# Supplementary material for: Reassessment of the involvement of Snord115 in the serotonin 2c receptor pathway in a genetically relevant mouse model
Source: eLife journal article supplement (doi:10.7554/elife.60862), 2020-10-05
Supplement: supp [file elife-60862-supp-v1.zip]

**A**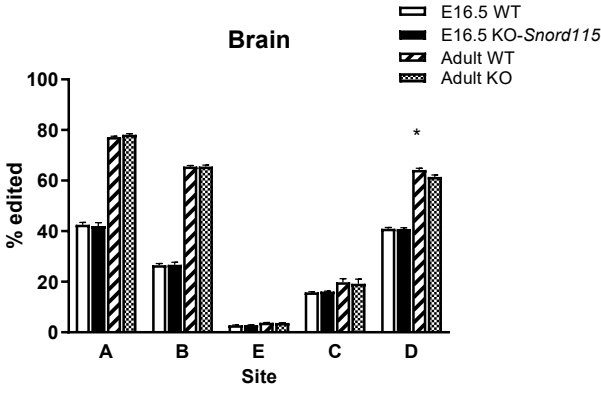**B**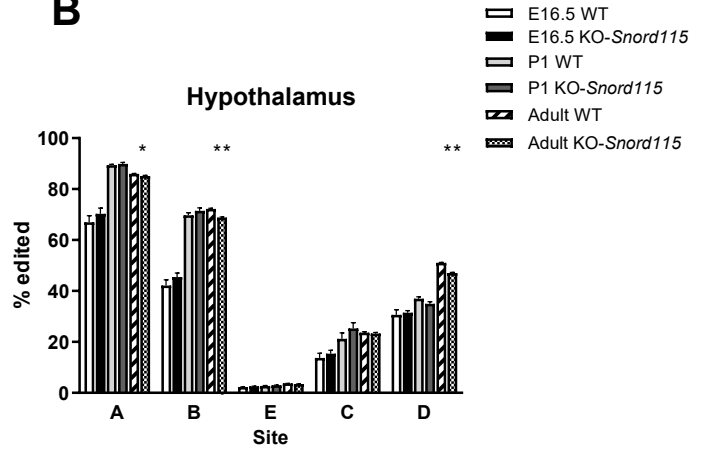**C**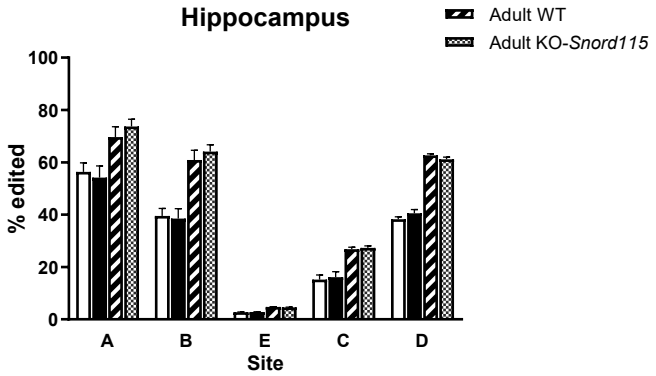**D**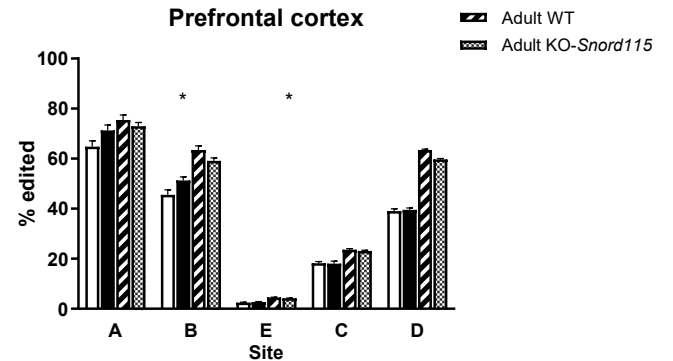

| RNA isoforms (amino acids) | Editing sites | Abundance (% in WT) | Fold-change (KO/WT) | p-value | Brain structures       |
|----------------------------|---------------|---------------------|---------------------|---------|------------------------|
| GGAAG (VNV)                | ABD           | 17.86               | 1.167               | 0.03044 | E16.5 embryonic cortex |
| GGGAG (VDV)                | ABED          | 0.4704              | 1.78                | 0.02194 | E16.5 embryonic cortex |
| AGGAA (MDI)                | BE            | 0.03237             | 1.174               | 0.04797 | E16.5 embryonic cortex |
| AAAAA (INI)                | nonedited     | 23.01               | 0.8434              | 0.02145 | E16.5 embryonic cortex |

**E**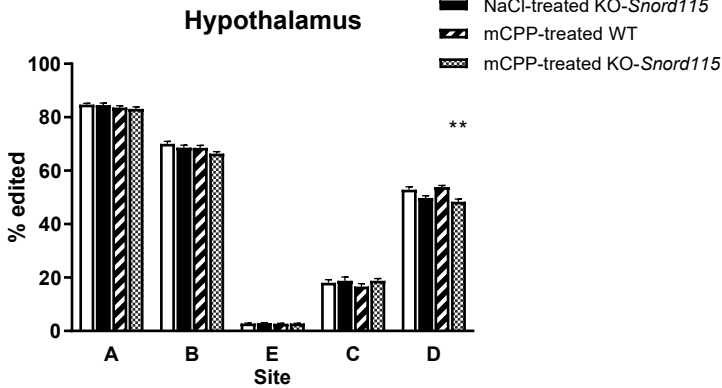**F**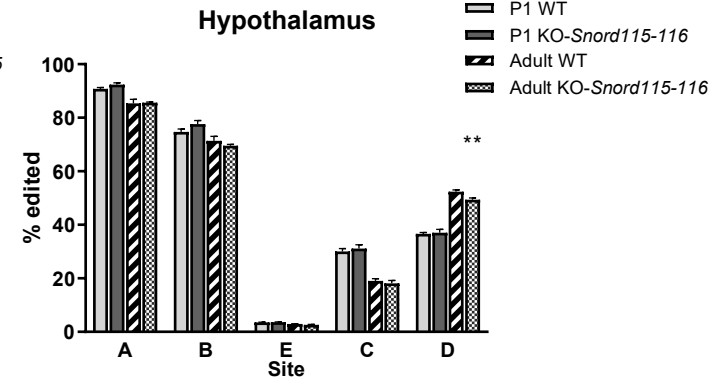

| RNA isoforms (amino acids) | Editing sites | Abundance (% in WT) | Fold-change (KO/WT) | p-value   | Brain structures            |
|----------------------------|---------------|---------------------|---------------------|-----------|-----------------------------|
| GAAAA (VNI)                | A             | 10.41               | 1.15                | 0.002292  | Hypothalamus (mCPP-treated) |
| GGAGG (VSV)                | ABCD          | 9.987               | 0.8686              | 0.01938   | Hypothalamus (mCPP-treated) |
| GGAAG (VNV)                | ABD           | 33.4                | 0.8878              | 0.0007347 | Hypothalamus (mCPP-treated) |
| GGGAG (VDV)                | ABED          | 0.8969              | 0.8454              | 0.01213   | Hypothalamus (mCPP-treated) |
| GAAGA (VSI)                | AC            | 1.158               | 1.226               | 0.01251   | Hypothalamus (mCPP-treated) |
| AAAGA (ISI)                | C             | 0.8562              | 1.214               | 0.009849  | Hypothalamus (mCPP-treated) |
| GAGGA (VGI)                | AEC           | 0.22581             | 0.7728              | 0.003318  | Hypothalamus (mCPP-treated) |
| AGAGA (MSI)                | BC            | 0.02579             | 2.17                | 0.03513   | Hypothalamus (NaCl-treated) |
| AGGAG (MDV)                | BED           | 0.01485             | 0.5301              | 0.02148   | Hypothalamus (NaCl-treated) |
| AAAGA (ISI)                | C             | 0.7209              | 1.387               | 0.003732  | Hypothalamus (NaCl-treated) |

| RNA isoforms (amino acids) | Editing sites | Abundance (% in WT) | Fold-change (KO/WT) | p-value   | Brain structures            |
|----------------------------|---------------|---------------------|---------------------|-----------|-----------------------------|
| GAAAA (VNI)                | A             | 9.523               | 1.218               | 0.0008377 | Hypothalamus (KO116/115)    |
| GGAAG (VNV)                | ABD           | 33.31               | 0.9414              | 0.02804   | Hypothalamus (KO116/115)    |
| GGGGG (VGV)                | ABECD         | 0.2064              | 0.8696              | 0.03686   | Hypothalamus (KO116/115)    |
| GAAAG (VNV)                | AD            | 3.15                | 1.081               | 0.02528   | Hypothalamus (KO116/115)    |
| GAGGA (VGI)                | AEC           | 0.2555              | 0.7705              | 0.04724   | Hypothalamus (KO116/115)    |
| GAGGG (VGV)                | AECD          | 0.08634             | 0.7894              | 0.03416   | Hypothalamus (KO116/115)    |
| AGAAA (MNI)                | B             | 0.6889              | 1.194               | 0.01163   | Hypothalamus (KO116/115)    |
| AAAGA (ISI)                | C             | 0.6924              | 1.36                | 0.01547   | Hypothalamus (KO116/115)    |
| GGGGG (VGV)                | ABECD         | 0.2646              | 1.494               | 0.03725   | Hypothalamus P1 (KO116/115) |
| GAAAG (VNV)                | AD            | 1.486               | 0.7761              | 0.04812   | Hypothalamus P1 (KO116/115) |
| GGAAA (VNI)                | AB            | 24.86               | 1.083               | 0.03069   | Hypothalamus P1 (KO116/115) |
