# Supplementary material for: Reassessment of the involvement of Snord115 in the serotonin 2c receptor pathway in a genetically relevant mouse model
Source: eLife. 2020 Oct 5;9:e60862. doi: 10.7554/eLife.60862 (PMC7673782; doi:10.7554/eLife.60862)
Supplement: Supplementary file 1. — Raw data are deposited at NCBI Gene Expression Omnibus (GEO) and accessible through GSE145159. Note that RiboMeth-seq data from WT littermates were also included in Hebras et al., 2020 RNA biol. [file elife-60862-supp1.xlsx]

## Sheet: Adult brain_KO115 vs WT
Data_handling_v3			Brain_wt_1						Brain_wt_2						Brain_wt_3						Average			Brain_115KO_1						Brain_115KO_2						Brain_115KO_3						Average
RNA	Position	Nucl	5'_reads	3'_reads	5'+3'	v5_score	v6_score	Meth%	5'_reads	3'_reads	5'+3'	v5_score	v6_score	Meth%	5'_reads	3'_reads	5'+3'	v5_score	v6_score	Meth%	Av.Meth%	Std.dev.	>=0.75	5'_reads	3'_reads	5'+3'	v5_score	v6_score	Meth%	5'_reads	3'_reads	5'+3'	v5_score	v6_score	Meth%	5'_reads	3'_reads	5'+3'	v5_score	v6_score	Meth%	Av.Meth%	Std.dev.	>=0.75
18S	1	U	592	0	592	0	0	0	855	0	855	0	0	0	2154	0	2154	0	0	0	0	0		1101	0	1101	0	0	0	6209	0	6209	0	0	0	1398	0	1398	0	0	0	0	0
18S	2	A	277	0	277	0	0	0	424	0	424	0	0	0	746	0	746	0	0	0	0	0		400	0	400	0	0	0	2918	0	2918	0	0	0	482	0	482	0	0	0	0	0
18S	3	C	761	0	761	0	0	0	763	0	763	0	0	0	1314	0	1314	0	0	0	0	0		725	0	725	0	0	0	5108	0	5108	0	0	0	919	0	919	0	0	0	0	0
18S	4	C	840	0	840	0	0	0	1186	0	1186	0	0	0	1762	0	1762	0	0	0	0	0		714	0	714	0	0	0	7188	0	7188	0	0	0	1592	0	1592	0	0	0	0	0
18S	5	U	497	0	497	0	0	0	1088	0	1088	0	0	0	1363	0	1363	0	0	0	0	0		557	0	557	0	0	0	5285	0	5285	0	0	0	1577	0	1577	0	0	0	0	0
18S	6	G	311	0	311	0	0	0	657	0	657	0	0	0	768	0	768	0	0	0	0	0		279	0	279	0	0	0	2851	0	2851	0	0	0	1097	0	1097	0	0	0	0	0
18S	7	G	410	0	410	0.00319005	0	0	305	0	305	0.725926	0.102336	0.421399	636	0	636	0.330141	0	0.248493	0.223297	0.172955		307	0	307	0.614214	0.0449155	0.38127	2398	0	2398	0.383113	0	0.277077	518	0	518	0.681717	0.0533854	0.405835	0.354727	0.0558153
18S	8	U	394	0	394	0.0874262	0	0.0805849	236	0	236	1.20497	0	0.547527	627	0	627	0.167781	0	0.143871	0.257328	0.206822		338	0	338	0.612848	0	0.380675	2377	0	2377	0.26112	0	0.207123	542	0	542	0.589134	0	0.371157	0.319652	0.0796644
18S	9	U	305	0	305	0.713181	0	0.417086	207	0	207	1.87505	0	0.653273	475	0	475	0.538375	0	0.350442	0.4736	0.129928		392	0	392	0.966469	0	0.492111	2389	0	2389	0.273157	0	0.214621	793	0	793	0.20974	0	0.173557	0.29343	0.141486
18S	10	G	206	0	206	1.82974	0.0779181	0.647716	202	0	202	2.12063	0	0.680627	333	0	333	1.07741	0.0324865	0.51938	0.615908	0.069565		421	0	421	1.13863	0	0.533001	1600	0	1600	0.883226	0	0.469152	565	0	565	0.843581	0	0.458016	0.486723	0.0330375
18S	11	A	165	0	165	3.19043	0.385117	0.762457	197	0	197	2.58883	0.154853	0.722374	206	0	206	2.23371	0.305003	0.691791	0.725541	0.028936		295	0	295	2.89501	0.286521	0.743906	1068	0	1068	1.83431	0.240799	0.647394	406	0	406	1.85998	0.168527	0.650906	0.680736	0.0446915
18S	12	U	187	0	187	3.16223	0.445456	0.760717	154	0	154	4.06022	0.484329	0.803404	204	0	204	2.15014	0.359476	0.683612	0.749244	0.0495733		425	0	425	2.17556	0.305716	0.685602	1278	0	1278	1.31906	0.193862	0.568983	325	0	325	2.85545	0.406898	0.741217	0.665267	0.0717695
18S	13	C	384	0	384	1.55296	0.24896	0.608917	258	0	258	2.89764	0.421779	0.744172	361	0	361	0.987508	0.120189	0.497549	0.616879	0.100841		654	0	654	1.66409	0.277767	0.624995	1487	0	1487	1.26926	0.210121	0.559493	476	0	476	2.31083	0.328425	0.698403	0.627631	0.0567405
18S	14	C	1205	0	1205	0.128017	0	0	1237	0	1237	0.132849	0	0	960	0	960	0.26003	0	0	0	0		2153	0	2153	0.148777	0	0	3528	0	3528	0.0146973	0	0	1888	0	1888	0.111699	0	0	0	0
18S	15	U	1938	0	1938	0.393548	0	0	2113	1	2114	0.441077	0	0	1178	0	1178	0.325068	0	0	0	0		4304	0	4304	0.563686	0	0	6506	0	6506	0.436456	0	0	3150	0	3150	0.410268	0	0	0	0
18S	16	G	1385	0	1385	0.0945647	0	0.0864518	1290	4	1294	0.197718	0	0.165185	787	1	788	0.262343	0	0.208031	0.153223	0.0503503		1990	0	1990	0.248211	0	0.198934	4276	0	4276	0.0636531	0	0.059857	1772	0	1772	0.348474	0	0.258529	0.17244	0.083243
18S	17	C	2099	0	2099	0.225317	0	0	2027	24	2051	0.216158	0	0	1143	0	1143	0.0668803	0	0	0	0		3439	0	3439	0.276292	0	0	6036	0	6036	0.220568	0	0	2827	0	2827	0.117067	0	0	0	0
18S	18	C	1028	0	1028	0.960512	0.0896174	0.490172	1237	23	1260	0.518689	0	0.341716	615	1	616	1.15523	0.144552	0.536416	0.456101	0.0830569		2253	1	2254	0.28234	0	0.220252	2513	0	2513	1.24792	0.152649	0.555243	1767	0	1767	0.663512	0	0.398998	0.391498	0.136862
18S	19	A	3076	1	3077	0.337153	0	0	3530	26	3556	0.465539	0	0	1924	3	1927	0.274735	0	0	0	0		5319	0	5319	0.471514	0	0	8054	0	8054	0.30382	0	0	5486	0	5486	0.483298	0	0	0	0
18S	20	G	1635	0	1635	0.540519	0.0397111	0.351007	1543	17	1560	0.594263	0	0.372901	920	2	922	1.05129	0.074026	0.512774	0.412227	0.0716567		1812	0	1812	1.03985	0.0662196	0.509907	4553	1	4554	0.603596	0	0.376453	2645	0	2645	0.397682	0	0.284607	0.390322	0.0924997
18S	21	U	2495	7	2502	0.0232033	0	0	2164	40	2204	0.101497	0	0.0921822	1809	14	1823	0.0150828	0	0.0148668	0.035683	0.0404094		2921	0	2921	0.207039	0	0.171575	8226	2	8228	0.151155	0	0	3924	0	3924	0.0938542	0	0	0.0571916	0.0808811
18S	22	A	3690	11	3701	0.365775	0	0	3385	106	3491	0.327374	0	0	2411	15	2426	0.168631	0	0	0	0		4328	0	4328	0.225407	0	0	9714	11	9725	0.154259	0	0	5017	9	5026	0.267606	0	0	0	0
18S	23	G	1917	80	1997	0.310194	0	0.236844	1046	81	1127	1.46154	0.114714	0.593965	1331	38	1369	0.679157	0	0.404639	0.411816	0.145882		1635	2	1637	1.34274	0.0607462	0.573298	4060	30	4090	1.47451	0.041623	0.595939	2054	10	2064	1.05062	0.0227571	0.512464	0.560567	0.0352473
18S	24	C	3399	91	3490	0.301795	0	0	2234	524	2758	0.0174137	0	0	2527	351	2878	0.209579	0	0	0	0		3862	3	3865	0.0470455	0	0	6777	755	7532	0.459722	0	0.314967	3777	197	3974	0.0784039	0	0.0727206	0.129229	0.13465
18S	25	A	3291	143	3434	0.297348	0	0	2526	1131	3657	0.268996	0	0	2499	563	3062	0.231926	0	0	0	0		4698	10	4708	0.235405	0	0	7070	2047	9117	0.318739	0	0.24172	3950	402	4352	0.0117467	0	0.0116129	0.0844444	0.111312
18S	26	U	4277	370	4647	0.552362	0	0	4504	1282	5786	0.598948	0	0	3869	2018	5887	0.659441	0	0	0	0		8782	155	8937	0.674896	0	0	12311	9549	21860	0.482751	0	0	7840	903	8743	0.56693	0	0	0	0
18S	27	A	34	0	34	69.7419	0.959736	0.986262	22	117	139	19.7534	0.830467	0.952143	11	4	15	164.283	0.974592	0.994326	0.977577	0.0182835	1	52	2	54	68.7523	0.940148	0.985921	46	96	142	99.0039	0.957139	0.99007	44	21	65	70.5899	0.946865	0.98624	0.98741	0.00188505	1
18S	28	U	1104	610	1714	0.211312	0	0.174533	1444	1055	2499	0.00448889	0	0	724	3089	3813	0.45818	0	0	0.0581776	0.0822756		2352	761	3113	0.052569	0	0.0499588	3555	24813	28368	0.612392	0	0	3000	3666	6666	0.436487	0	0	0.0166529	0.0235508
18S	29	G	1681	558	2239	0.206215	0	0	1680	1745	3425	0.364649	0	0	689	1229	1918	0.101361	0	0.0920758	0.0306919	0.0434049		3275	1062	4337	0.337967	0	0	6148	13487	19635	0.403963	0	0	3370	998	4368	0.135068	0	0	0	0
18S	30	C	1411	403	1814	0.0917784	0	0	1951	1493	3444	0.408483	0	0	1010	1308	2318	0.184438	0	0	0	0		3779	454	4233	0.361227	0	0	4860	14562	19422	0.42175	0	0	4081	2435	6516	0.490256	0	0	0	0
18S	31	U	533	447	980	0.568943	0	0.362864	839	883	1722	0.189385	0	0.159307	449	824	1273	0.395072	0	0.283351	0.268507	0.0837619		1380	123	1503	0.895021	0	0.472467	1275	11960	13235	0.157073	0	0	1471	1724	3195	0.0690551	0	0.0646134	0.179027	0.209164
18S	32	U	290	528	818	0.665459	0	0.399858	582	858	1440	0.278803	0	0.218137	271	1069	1340	0.135504	0	0.119412	0.245803	0.116151		1207	330	1537	0.69706	0	0.410903	301	11004	11305	0.0865224	0	0	332	2188	2520	0.244678	0	0.196642	0.202515	0.167802
18S	33	G	449	588	1037	0.0934918	0	0.0855738	428	502	930	0.751307	0	0.429261	291	574	865	0.426803	0	0.299375	0.271403	0.141697		1029	315	1344	0.706295	0	0.414115	1139	3198	4337	1.19868	0.0113006	0.54524	878	513	1391	0.980452	0	0.495244	0.484866	0.0540319
18S	34	U	501	263	764	0.611329	0.0654276	0.379702	382	213	595	1.90792	0.282821	0.656491	201	395	596	1.11173	0.112006	0.526871	0.521022	0.113074		989	98	1087	1.2812	0.1643	0.56186	1201	876	2077	3.51154	0.468023	0.778429	723	213	936	1.98482	0.308277	0.665209	0.6685	0.0884445
18S	35	C	572	429	1001	0.190552	0	0.160188	629	164	793	1.07379	0.0916622	0.518106	397	449	846	0.234894	0	0.190396	0.289563	0.162074		1269	102	1371	0.759799	0.0173494	0.431932	1549	1922	3471	1.15221	0.0914952	0.535433	1066	687	1753	0.341505	0	0.254677	0.407347	0.115929
18S	36	U	493	64	557	1.18969	0.278792	0.543758	476	60	536	2.00459	0.341249	0.66759	180	136	316	2.36831	0.396485	0.703775	0.638374	0.068515		1125	59	1184	0.982007	0.0895784	0.495672	1453	226	1679	2.92761	0.382704	0.745505	677	260	937	1.43241	0.190223	0.589143	0.610107	0.103066
18S	37	C	1271	162	1433	0.18207	0	0	1489	275	1764	0.159421	0	0	683	200	883	0.119696	0	0.107008	0.0356695	0.0504443		3844	106	3950	0.48428	0	0	3997	1073	5070	0.0665374	0	0.0623979	1665	703	2368	0.185399	0	0	0.0207993	0.0294147
18S	38	A	941	148	1089	0.24893	0	0.199461	1301	209	1510	0.171307	0	0.146335	472	230	702	0.623171	0.0187342	0.384259	0.243352	0.101969		2707	96	2803	0.140054	0	0	3123	1767	4890	0.0765669	0	0.0711349	1214	563	1777	0.199225	0	0.166206	0.0791137	0.0680875
18S	39	A	1157	194	1351	0.0891354	0	0.0818962	1860	291	2151	0.144331	0	0	626	342	968	0.214952	0	0.177073	0.086323	0.0723575		3330	118	3448	0.292043	0	0	4207	2222	6429	0.239584	0	0	1678	556	2234	0.0226995	0	0	0	0
18S	40	A	1303	369	1672	0.0699409	0	0	2080	392	2472	0.196284	0	0	850	468	1318	0.0776767	0	0	0	0		3103	196	3299	0.212899	0	0	4506	2269	6775	0.259466	0	0	2033	681	2714	0.152212	0	0	0	0
18S	41	G	1018	612	1630	0.042353	0	0.040656	1327	516	1843	0.184719	0	0.15599	666	487	1153	0.14456	0	0.126397	0.107681	0.0489093		1619	501	2120	0.356567	0	0.262936	2647	2882	5529	0.0298091	0	0	1231	673	1904	0.323587	0	0.244574	0.16917	0.119856
18S	42	A	1101	418	1519	0.223662	0	0.182879	1412	581	1993	0.174769	0	0.148832	850	674	1524	0.0995191	0	0	0.110571	0.0794111		1396	200	1596	0.940082	0.173545	0.484714	2593	2061	4654	0.225633	0	0.184127	1450	713	2163	0.220713	0	0.180875	0.283239	0.142471
18S	43	U	1218	935	2153	0.0668059	0	0	1660	1005	2665	0.0484996	0	0	1067	833	1900	0.217891	0	0	0	0		1731	1150	2881	0.105999	0	0.0958701	2906	3108	6014	0.00347649	0	0	1718	1128	2846	0.0159427	0	0.015698	0.0371893	0.0419855
18S	44	U	1698	1156	2854	0.275785	0	0	2548	2452	5000	0.515808	0	0	1679	1375	3054	0.519098	0	0	0	0		2914	1657	4571	0.323063	0	0	5398	3598	8996	0.346842	0	0	2809	1983	4792	0.39987	0	0	0	0
18S	45	A	871	1465	2336	0.0280226	0	0.0272701	1033	1106	2139	0.381521	0	0.276254	633	802	1435	0.273855	0	0.215099	0.172874	0.105941		1056	1213	2269	0.639814	0.0619346	0.39028	1887	2661	4548	0.503661	0.050322	0.335006	1212	1752	2964	0.169372	0	0.144882	0.290056	0.105104
18S	46	A	741	1311	2052	0.277388	0	0.217235	1200	1315	2515	0.175658	0	0.149463	543	584	1127	0.71252	0.0443877	0.416281	0.260993	0.113237		1605	1635	3240	0.170356	0	0.145597	2315	2514	4829	0.445641	0.0350154	0.308309	1477	1609	3086	0.181917	0	0.153959	0.202622	0.0748103
18S	47	G	508	1669	2177	0.315085	0.00633568	0.239677	519	853	1372	1.36773	0.240403	0.577832	344	734	1078	0.907919	0.138223	0.4761	0.431203	0.141655		761	2645	3406	0.177474	0	0.150762	2025	2311	4336	0.772846	0.13358	0.435992	877	1037	1914	1.1977	0.207745	0.545108	0.377287	0.166256
18S	48	C	620	1943	2563	0.177115	0	0.150515	854	2029	2883	0.12245	0	0.109125	532	1118	1650	0.266512	0	0.210531	0.156724	0.0416307		953	3012	3965	0.0593573	0	0.0560448	3193	3875	7068	0.134536	0	0.118597	1245	2075	3320	0.34672	0.00352836	0.257512	0.144051	0.0841952
18S	49	C	951	2615	3566	0.0950752	0	0	1272	3270	4542	0.282368	0	0	899	1549	2448	0.0992151	0	0	0	0		2109	2884	4993	0.0856472	0	0	3955	5425	9380	0.0647135	0	0	2133	3668	5801	0.168614	0	0	0	0
18S	50	A	832	1952	2784	0.248709	0	0.19923	1093	2570	3663	0.0718523	0	0	671	1788	2459	0.0834959	0	0	0.0664101	0.0939181		1850	2893	4743	0.0038739	0	0	3586	4954	8540	0.102104	0	0.0926541	1605	3109	4714	0.119057	0	0.106411	0.066355	0.047255
18S	51	U	977	4140	5117	0.349605	0	0	1253	3395	4648	0.313303	0	0	625	2941	3566	0.403286	0	0	0	0		2111	5981	8092	0.470658	0	0	4176	8214	12390	0.239792	0	0	3170	4190	7360	0.293553	0	0	0	0
18S	52	G	1019	2448	3467	0.0496604	0	0.0473239	748	1555	2303	0.486526	0	0.327386	368	1378	1746	0.371946	0	0.271221	0.21531	0.120977		850	3667	4517	0.0460799	0	0.0440594	3103	4500	7603	0.384954	0	0.277981	1418	2587	4005	0.476283	0	0.322678	0.214906	0.122177
18S	53	C	1853	3020	4873	0.271137	0	0	1521	3058	4579	0.327031	0	0	977	1967	2944	0.225931	0	0	0	0		1633	3357	4990	0.0848038	0	0	5361	10095	15456	0.341223	0	0	2991	5353	8344	0.313221	0	0	0	0
18S	54	A	1730	1663	3393	0.0876318	0	0.080593	1291	2242	3533	0.116359	0	0	754	1301	2055	0.141877	0	0.124302	0.0682984	0.0514855		1588	2510	4098	0.112765	0	0.10136	4770	7319	12089	0.110997	0	0	2622	3969	6591	0.0719795	0	0	0.0337865	0.0477814
18S	55	U	1971	3717	5688	0.409762	0	0	1456	3263	4719	0.40916	0	0	918	3437	4355	0.540677	0	0	0	0		2212	5993	8205	0.514104	0	0	6143	11234	17377	0.420646	0	0	4052	6313	10365	0.448413	0	0	0	0
18S	56	G	1335	1639	2974	0.164844	0	0.141557	728	1534	2262	0.216217	0	0.177843	394	1138	1532	0.399855	0	0.285773	0.201725	0.06125		1127	1632	2759	0.574255	0.0571544	0.364863	3350	5461	8811	0.20414	0	0.169547	1603	3099	4702	0.294398	0	0.227478	0.253963	0.081907
18S	57	U	1419	1880	3299	0.01233	0	0	853	1579	2432	0.0228022	0	0.0223028	647	1372	2019	0.0515677	0	0	0.00743427	0.0105137		1219	761	1980	1.13328	0.198304	0.531365	4307	6274	10581	0.0559367	0	0	2144	3184	5328	0.0867121	0	0.0798069	0.203724	0.233957
18S	58	C	1562	1664	3226	0.0905451	0	0	716	408	1124	1.07288	0.207277	0.517801	477	1319	1796	0.0600322	0	0	0.1726	0.244094		1140	1602	2742	0.389675	0	0.280481	4568	4380	8948	0.0480389	0	0.0458418	2360	3444	5804	0.0857173	0	0	0.108774	0.122849
18S	59	U	1854	956	2810	0.0278193	0	0	871	634	1505	0.443707	0	0.30748	781	522	1303	0.221583	0	0.181504	0.162995	0.126209		1383	1034	2417	0.601388	0.0242919	0.375639	5533	5511	11044	0.228638	0	0	3013	3524	6537	0.236807	0	0	0.125213	0.177078
18S	60	A	930	688	1618	0.581456	0.0804415	0.367815	390	820	1210	0.610506	0.0138123	0.379271	326	372	698	1.07485	0.111005	0.518396	0.421827	0.068444		568	2578	3146	0.173057	0	0.147567	1828	3594	5422	0.493192	0.0433863	0.330334	1407	2448	3855	0.228662	0	0.186146	0.221349	0.0786572
18S	61	A	1459	866	2325	0.0343078	0	0	683	800	1483	0.199274	0	0.166255	631	538	1169	0.0761918	0	0.0708539	0.0790364	0.0681197		1125	3581	4706	0.248417	0	0	3608	3508	7116	0.00294444	0	0.0029362	2597	1875	4472	0.0305239	0	0	0.000978735	0.00138414
18S	62	G	693	652	1345	0.507083	0.0949265	0.336632	351	815	1166	0.38629	0	0.278822	264	308	572	0.902114	0.173749	0.474705	0.363386	0.0821758		406	2423	2829	0.262517	0	0.207989	2156	2457	4613	0.387006	0.0309317	0.279066	1270	865	2135	0.920339	0.210533	0.479376	0.322144	0.114904
18S	63	U	901	1066	1967	0.0858909	0	0	789	1124	1913	0.163126	0	0	595	521	1116	0.126748	0	0	0	0		826	3031	3857	0.0716347	0	0	3006	3454	6460	0.0946534	0	0	1553	1849	3402	0.144027	0	0.125927	0.0419756	0.0593624
18S	64	A	495	701	1196	0.475188	0.0655019	0.322303	338	901	1239	0.344516	0	0.256392	232	362	594	0.617591	0.0901129	0.382194	0.320296	0.0513781		431	3253	3684	0.0103272	0	0.0102243	1568	1891	3459	0.663513	0.0987264	0.398932	1259	1068	2327	0.677468	0.0953009	0.403967	0.271041	0.184437
18S	65	C	383	971	1354	0.187429	0	0.157943	324	2004	2328	0.320705	0	0	214	566	780	0.130659	0	0.115691	0.0912112	0.0667628		404	5310	5714	0.389149	0	0	1468	2310	3778	0.418047	0	0.29486	1714	1867	3581	0.00361065	0	0	0.0982866	0.138998
18S	66	G	272	1192	1464	0.0210315	0	0.020612	208	939	1147	0.539654	0	0.350702	195	477	672	0.304507	0.0089538	0.233693	0.201669	0.136648		291	2706	2997	0.264569	0	0.209272	1539	1551	3090	0.667979	0.12902	0.40055	1106	712	1818	0.998711	0.19905	0.499815	0.369879	0.12058
18S	67	C	393	893	1286	0.171182	0	0.146259	526	1332	1858	0.0112725	0	0	498	512	1010	0.135191	0	0	0.0487529	0.068947		413	3839	4252	0.144917	0	0	2397	2879	5276	0.0370876	0	0	2750	1747	4497	0.238353	0	0	0	0
18S	68	A	261	881	1142	0.34947	0.0273112	0.259136	388	792	1180	0.760438	0.0827081	0.432168	333	417	750	0.32237	0	0.244028	0.311777	0.0853519		347	3246	3593	0.0310487	0	0.0301218	1707	1923	3630	0.505673	0.0807732	0.335907	1977	1611	3588	0.0283985	0	0.0276218	0.131217	0.144741
18S	69	C	537	916	1453	0.052751	0	0.0501405	604	2864	3468	0.455764	0	0	514	681	1195	0.154404	0	0	0.0167135	0.0236365		559	3363	3922	0.0766647	0	0	2268	5109	7377	0.280799	0	0	2955	2561	5516	0.34087	0	0	0	0
18S	70	G	480	1605	2085	0.277687	0	0	531	1032	1563	0.417271	0	0.294551	401	567	968	0.189015	0	0.159106	0.151219	0.120379		883	2369	3252	0.147413	0	0.128508	2072	3619	5691	0.0469938	0	0.0448921	2341	1814	4155	0.0115496	0	0	0.0578002	0.0532514
18S	71	G	377	869	1246	0.319006	0	0.242	569	813	1382	0.670587	0.0202621	0.401582	328	463	791	0.606327	0.0536766	0.377759	0.340447	0.0702885		1173	1240	2413	0.582583	0.0974149	0.368218	1744	2615	4359	0.484416	0.0386837	0.326385	1267	1161	2428	0.879351	0.145713	0.468004	0.387536	0.0594074
18S	72	C	711	530	1241	0.445768	0.0169119	0.308498	1021	972	1993	0.248551	0	0.199152	648	234	882	0.650107	0.0747173	0.394249	0.300633	0.0798422		2120	424	2544	0.591054	0.0517269	0.371578	3498	2662	6160	0.111782	0	0.100558	2560	851	3411	0.460717	0	0.315468	0.262535	0.116803
18S	73	C	1079	594	1673	0.0863866	0	0.0795611	1824	1786	3610	0.314536	0	0	809	429	1238	0.242005	0	0.194977	0.0915127	0.0800464		3552	336	3888	0.033819	0	0.0327209	4823	3273	8096	0.136846	0	0	4043	758	4801	0.0928548	0	0.0849816	0.0392341	0.0349979
18S	74	G	1198	1397	2595	0.319521	0	0	1852	1769	3621	0.311096	0	0	963	1556	2519	0.427429	0	0	0	0		4476	765	5241	0.266366	0	0	6256	2456	8712	0.187039	0	0	4434	1581	6015	0.136468	0	0	0	0
18S	75	G	664	777	1441	0.394121	0	0.282843	839	726	1565	0.782652	0	0.439195	594	751	1345	0.221339	0	0.181337	0.301125	0.106061		1943	677	2620	0.57406	0	0.364789	4508	2513	7021	0.089313	0	0.0820009	2762	1211	3973	0.427557	0	0.299555	0.248782	0.120901
18S	76	U	1178	1271	2449	0.213991	0	0	1995	1140	3135	0.207933	0	0	1140	1463	2603	0.42104	0	0	0	0		3858	1351	5209	0.278816	0	0	7653	4170	11823	0.396656	0	0	5952	2253	8205	0.364473	0	0	0	0
18S	77	A	813	650	1463	0.406618	0	0.289215	1248	529	1777	0.491295	0	0.329566	677	888	1565	0.0426352	0	0.0409168	0.219899	0.127627		2320	1462	3782	0.0335536	0	0.0324726	4265	2024	6289	0.248763	0	0.199233	4158	1459	5617	0.00467545	0	0	0.0772353	0.0872782
18S	78	C	2329	1292	3621	0.486122	0	0	3985	1892	5877	0.63521	0	0	1912	1442	3354	0.583862	0	0	0	0		7369	2182	9551	0.666082	0	0	7242	3560	10802	0.318968	0	0	8977	2305	11282	0.558811	0	0	0	0
18S	79	A	917	953	1870	0.129919	0	0.115035	918	1899	2817	0.15209	0	0	625	897	1522	0.0128256	0	0.0126714	0.0425688	0.0515018		1447	1927	3374	0.118542	0	0.106007	3063	2743	5806	0.35894	0.0423883	0.264166	3891	2476	6367	0.146502	0	0	0.123391	0.108544
18S	80	G	603	854	1457	0.51499	0.0540906	0.340084	379	744	1123	1.12348	0.131052	0.529296	349	335	684	1.26991	0.242815	0.559814	0.476398	0.0971906		654	1395	2049	0.809935	0.0659047	0.447615	2348	2954	5302	0.491037	0.0859692	0.329367	1551	1153	2704	1.08403	0.195966	0.520253	0.432412	0.0786666
18S	81	U	691	1899	2590	0.170651	0	0	588	1273	1861	0.141622	0	0.124112	466	624	1090	0.257042	0	0.204631	0.109581	0.0841698		946	854	1800	0.960392	0.0665366	0.490037	3171	5594	8765	0.154125	0	0	2706	2631	5337	0.0389721	0	0	0.163346	0.231006
18S	82	G	801	713	1514	0.535614	0.0456614	0.348945	508	304	812	1.65211	0.238527	0.623231	485	409	894	0.471248	0	0.320548	0.430908	0.136486		899	929	1828	0.866162	0.0544452	0.464277	2527	4391	6918	0.0738691	0	0.068797	2159	1478	3637	0.413209	0.00227197	0.292448	0.275174	0.161915
18S	83	A	941	1005	1946	0.174108	0	0.148355	865	935	1800	0.0695046	0	0.0650214	441	550	991	0.197928	0	0.165364	0.126247	0.0438463		1495	1270	2765	0.116337	0	0.104247	2510	4438	6948	0.0315553	0	0.0305943	1686	2332	4018	0.193625	0	0.16225	0.0990303	0.0538745
18S	84	A	687	1315	2002	0.128995	0	0.114307	511	1042	1553	0.195596	0	0.163685	325	466	791	0.418967	0	0.295525	0.191172	0.0764925		549	1973	2522	0.152363	0	0.132263	1745	4299	6044	0.171032	0	0.146073	1520	2058	3578	0.285881	0	0.222371	0.166902	0.0396254
18S	85	A	507	1805	2312	0.0944228	0	0	434	1164	1598	0.0255993	0	0	264	553	817	0.172372	0	0.147182	0.0490605	0.0693821		413	2271	2684	0.0956714	0	0	1351	6025	7376	0.124977	0	0	1394	2283	3677	0.13046	0	0.115432	0.0384775	0.0544154
18S	86	C	772	2022	2794	0.291318	0	0	1050	795	1845	0.234513	0	0	494	651	1145	0.246587	0	0	0	0		802	2232	3034	0.257591	0	0	2381	6707	9088	0.345223	0	0	2122	1962	4084	0.0417408	0	0	0	0
18S	87	U	606	3230	3836	0.539742	0	0	909	1001	1910	0.293273	0	0	406	773	1179	0.294322	0	0	0	0		726	3123	3849	0.473304	0	0	1721	6134	7855	0.273185	0	0	2012	3427	5439	0.332194	0	0	0	0
18S	88	G	659	1421	2080	0.133472	0	0	542	678	1220	0.0937483	0	0.0857771	423	507	930	0.11906	0	0	0.0285924	0.0404357		501	1883	2384	0.133892	0	0	1904	2238	4142	0.34184	0	0.254801	1394	2058	3452	0.0604016	0	0.0569766	0.103926	0.109191
18S	89	C	413	1767	2180	0.244409	0	0	654	1383	2037	0.421094	0	0	383	773	1156	0.35641	0	0	0	0		437	2005	2442	0.221235	0	0	1649	6013	7662	0.397164	0	0	1420	3569	4989	0.342411	0	0	0	0
18S	90	G	152	550	702	1.38786	0.272519	0.581562	279	552	831	0.495633	0.0757027	0.331653	165	302	467	0.690598	0.142302	0.40901	0.440742	0.104463		135	756	891	1.13478	0.249739	0.531847	606	2560	3166	0.463821	0.0747429	0.316925	566	2198	2764	0.186984	0	0.157577	0.335449	0.153355
18S	91	A	194	602	796	0.997212	0.0762311	0.499616	184	499	683	0.797661	0.103634	0.444083	137	363	500	0.580772	0.0430563	0.367862	0.437187	0.0540088		163	928	1091	0.662424	0	0.398688	495	2107	2602	0.628903	0.0963487	0.386181	508	3241	3749	0.197804	0	0	0.261623	0.185066
18S	92	A	392	376	768	0.964832	0.0195618	0.491376	376	419	795	0.578546	0	0.366797	229	272	501	0.681563	0.0019865	0.405796	0.421323	0.0520305		310	677	987	0.752339	0	0.429582	705	1167	1872	1.10345	0.157217	0.524724	710	1867	2577	0.166934	0	0.143101	0.365803	0.162193
18S	93	U	126	317	443	2.08398	0.0884204	0.676238	114	425	539	1.22337	0.0146668	0.550692	122	283	405	0.982895	0	0.496303	0.574411	0.0753483		139	243	382	3.21712	0.298179	0.763344	271	1541	1812	0.835987	0	0.455471	278	610	888	2.24244	0.341289	0.691831	0.636882	0.131557
18S	94	G	431	453	884	0.368035	0	0.269247	250	504	754	0.559853	0	0.359219	237	451	688	0.17402	0	0.148409	0.258958	0.0863695		324	636	960	0.556666	0	0.35784	631	1849	2480	0.192387	0	0.1614	713	1972	2685	0.0923223	0	0	0.17308	0.146321
18S	95	G	526	252	778	0.626901	0	0.385639	339	326	665	0.964198	0.00035978	0.491262	219	240	459	1.05928	0.0280866	0.514936	0.463945	0.0562085		612	504	1116	0.447767	0	0.309472	539	1580	2119	0.480608	0	0.324705	534	960	1494	0.761375	0	0.432426	0.355535	0.0547249
18S	96	C	999	415	1414	0.148496	0	0	736	752	1488	0.141877	0	0	509	404	913	0.0536834	0	0.0510013	0.0170004	0.0240423		1207	474	1681	0.0365504	0	0.0352818	889	2086	2975	0.0173686	0	0.0170777	573	774	1347	0.972709	0.0505767	0.493268	0.181876	0.220313
18S	97	U	1573	836	2409	0.516556	0	0	1037	828	1865	0.276897	0	0	893	430	1323	0.239879	0	0	0	0		2433	743	3176	0.439436	0	0	772	1991	2763	0.193126	0	0.161915	586	2564	3150	0.184566	0	0	0.0539715	0.0763273
18S	98	C	1024	910	1934	0.358231	0	0	790	2023	2813	0.538443	0	0	953	1023	1976	0.505244	0	0	0	0		1254	766	2020	0.0122657	0	0.012123	1393	3071	4464	0.271776	0	0	794	2774	3568	0.294156	0	0	0.00404099	0.00571482
18S	99	A	25	4	29	48.6426	0.925681	0.980514	20	126	146	10.1494	0.677076	0.910864	16	8	24	48.7756	0.915637	0.980698	0.957359	0.0328766	1	56	18	74	31.065	0.892712	0.969216	55	38	93	40.8747	0.927623	0.976367	32	39	71	40.3465	0.917936	0.976142	0.973909	0.00331914	1
18S	100	U	1068	788	1856	0.275396	0	0	821	824	1645	0.0315985	0	0	721	865	1586	0.289169	0	0	0	0		1363	1442	2805	0.155924	0	0	1377	2554	3931	0.0177659	0	0	647	1965	2612	0.166343	0	0.142666	0.0475555	0.0672536
18S	101	U	1051	1286	2337	0.427003	0	0	1047	1729	2776	0.436994	0	0	995	1409	2404	0.548191	0	0	0	0		1588	2497	4085	0.381653	0	0	1544	5704	7248	0.479531	0	0	862	4566	5428	0.444123	0	0	0	0
18S	102	A	643	690	1333	0.0986757	0	0.0898746	864	1143	2007	0.167458	0	0	573	825	1398	0.137995	0	0	0.0299582	0.0423673		1286	2990	4276	0.374471	0	0	1064	4995	6059	0.334736	0	0	614	4115	4729	0.3165	0	0	0	0
18S	103	A	543	669	1212	0.183622	0	0.155244	566	1117	1683	0.016891	0	0	379	721	1100	0.0852054	0	0.0785812	0.0779416	0.0633796		811	1999	2810	0.0158465	0	0.0156047	1061	4361	5422	0.251589	0	0	535	3216	3751	0.0879235	0	0	0.00520158	0.00735615
18S	104	A	180	551	731	1.00165	0.107237	0.500755	244	623	867	1.04169	0.0333866	0.510498	222	366	588	1.11736	0.0623267	0.528136	0.51313	0.0113321		297	1465	1762	0.758032	0	0.431321	410	2462	2872	0.596477	0	0.373702	194	1966	2160	0.771793	0	0.435714	0.413579	0.0282542
18S	105	U	281	823	1104	0.291735	0	0.226005	315	535	850	1.09064	0.0640973	0.521971	283	449	732	0.610111	0	0.379246	0.375741	0.120853		604	1270	1874	0.772984	0	0.43611	514	2264	2778	0.693835	0	0.409711	334	1666	2000	1.0303	0.0309816	0.507587	0.451136	0.0413464
18S	106	C	716	935	1651	0.0818536	0	0	0.0272845	0.0385862	2608	0.321967	0	0	543	720	1263	0.0522504	0	0	0	0		1800	2218	4018	0.120428	0	0	1071	5168	6239	0.254783	0	0	1224	4854	6078	0.317507	0	0	0	0
18S	107	A	832	1014	1846	0.189268	0	0	1040	1219	2259	0.173274	0	0	699	801	1500	0.245237	0	0	0	0		2260	2771	5031	0.293789	0	0	1163	4153	5316	0.0954632	0	0	1706	4257	5963	0.250285	0	0	0	0
18S	108	G	601	656	1257	0.211394	0	0.174619	674	340	1014	0.961861	0.107856	0.490526	393	330	723	0.586986	0.0300548	0.370197	0.345114	0.130182		1263	1766	3029	0.238841	0	0.192845	732	1984	2716	0.838507	0.113122	0.456172	759	1368	2127	1.30299	0.152082	0.565897	0.404971	0.156542
18S	109	U	457	572	1029	0.526839	0.0144514	0.345272	481	397	878	1.30857	0.194356	0.567111	298	320	618	0.849794	0.102516	0.459801	0.457394	0.0905815		922	359	1281	2.04929	0.251671	0.672227	482	1423	1905	1.63773	0.293067	0.62101	535	1561	2096	1.36264	0.153045	0.576861	0.623366	0.0389685
18S	110	U	841	1257	2098	0.327341	0	0	1228	1460	2688	0.3363	0	0	758	993	1751	0.44558	0	0	0	0		2305	2770	5075	0.328885	0	0	1024	6712	7736	0.463807	0	0	1513	5405	6918	0.374608	0	0	0	0
18S	111	A	745	1031	1776	0.157882	0	0	1221	1445	2666	0.301204	0	0	522	669	1191	0.110048	0	0	0	0		2070	3346	5416	0.367485	0	0	975	5238	6213	0.298929	0	0	1387	4751	6138	0.265885	0	0	0	0
18S	112	U	785	1840	2625	0.454722	0	0	1001	2373	3374	0.454558	0	0	518	1146	1664	0.39019	0	0	0	0		1724	5611	7335	0.569276	0	0	771	5547	6318	0.326755	0	0	1273	7594	8867	0.524788	0	0	0	0
18S	113	G	633	851	1484	0.016648	0	0.0163862	917	1332	2249	0.164573	0	0	443	501	944	0.116602	0	0.104525	0.0403037	0.0459013		1608	2093	3701	0.111492	0	0	547	4303	4850	0.166316	0	0	1045	5525	6570	0.371925	0	0	0	0
18S	114	G	631	409	1040	0.449237	0	0.310187	870	860	1730	0.0860774	0	0.0792975	527	395	922	0.108932	0	0.0983277	0.162604	0.104646		1259	809	2068	0.515998	0	0.340477	621	4041	4662	0.204037	0	0	942	2170	3112	0.34039	0	0.254009	0.198162	0.1445
18S	115	U	660	598	1258	0.102806	0	0.0932898	827	703	1530	0.177008	0	0.150472	487	372	859	0.132506	0	0.117123	0.120295	0.023452		1156	803	1959	0.439972	0	0.30565	599	2989	3588	0.0291477	0	0	912	2391	3303	0.15756	0	0.136149	0.147267	0.125029
18S	116	U	43	95	138	10.09	0.744296	0.910419	87	24	111	16.864	0.843874	0.944494	33	52	85	11.9948	0.775904	0.923873	0.926262	0.0140129	1	78	320	398	6.22643	0.596931	0.861918	68	52	120	29.4938	0.909695	0.967469	99	71	170	22.7116	0.8735	0.958063	0.92915	0.0476949	1
18S	117	C	958	719	1677	0.2206	0	0	1496	472	1968	0.14195	0	0	856	295	1151	0.156308	0	0	0	0		1589	1165	2754	0.177782	0	0	1077	2375	3452	0.189381	0	0	1638	1444	3082	0.0646304	0	0.0607254	0.0202418	0.0286262
18S	118	C	1346	751	2097	0.400238	0	0	1837	390	2227	0.290589	0	0	964	274	1238	0.187481	0	0	0	0		1726	699	2425	0.183022	0	0	1574	1022	2596	0.023463	0	0	2283	1298	3581	0.192748	0	0	0	0
18S	119	U	1041	88	1129	0.22764	0	0.185563	1276	169	1445	0.13925	0	0.122304	795	51	846	0.359766	0	0.26481	0.190892	0.0582996		1029	97	1126	0.614848	0	0.380956	1174	242	1416	0.693899	0	0.409817	1705	210	1915	0.437677	0	0.304544	0.365106	0.0444149
18S	120	U	1089	347	1436	0.0405474	0	0	1594	300	1894	0.17973	0	0	950	290	1240	0.0435312	0	0	0	0		1463	249	1712	0.0606149	0	0	1222	474	1696	0.261409	0	0.207333	1964	722	2686	0.105525	0	0	0.0691109	0.0977375
18S	121	U	27	9	36	43.9042	0.934968	0.978319	40	12	52	33.9966	0.910442	0.97195	19	7	26	54.6687	0.947316	0.98269	0.977653	0.00441003	1	25	8	33	52.1392	0.943356	0.981725	18	9	27	79.6536	0.960751	0.988039	41	34	75	35.3281	0.914681	0.972825	0.980863	0.00624066	1
18S	122	G	1633	441	2074	0.250624	0	0	2137	505	2642	0.372191	0	0	1733	316	2049	0.281837	0	0	0	0		2015	351	2366	0.330151	0	0	2130	654	2784	0.292132	0	0	3112	913	4025	0.415096	0	0	0	0
18S	123	G	894	358	1252	0.483072	0.0219467	0.325899	1003	454	1457	0.42178	0	0.2968	1053	245	1298	0.44979	0	0.31041	0.311036	0.0118881		962	262	1224	0.572635	0	0.364314	1150	640	1790	0.350202	0	0.259477	1256	724	1980	0.453968	0	0.312336	0.312042	0.0427998
18S	124	U	1099	749	1848	0.00437474	0	0	1107	417	1524	0.394754	0	0.283161	1416	378	1794	0.0976849	0	0.089037	0.124066	0.118224		977	483	1460	0.332421	0	0.249615	1239	893	2132	0.126384	0	0.11225	1705	667	2372	0.197415	0	0.164926	0.175597	0.0565841
18S	125	C	1838	962	2800	0.36579	0	0	2298	718	3016	0.311111	0	0	2544	457	3001	0.340799	0	0	0	0		2092	545	2637	0.282449	0	0	2381	781	3162	0.221688	0	0	3323	766	4089	0.352795	0	0	0	0
18S	126	G	938	647	1585	0.235876	0	0.190955	927	322	1249	0.919138	0.0693234	0.479132	1271	313	1584	0.417007	0	0.294418	0.321502	0.119196		809	647	1456	0.477206	0	0.323196	1209	432	1641	0.722885	0.036588	0.419727	1576	357	1933	0.51141	0	0.338482	0.360468	0.0423641
18S	127	C	1450	1227	2677	0.319525	0	0	2115	817	2932	0.227408	0	0	2283	791	3074	0.316235	0	0	0	0		1474	696	2170	0.00459594	0	0	2402	973	3375	0.175142	0	0	3280	575	3855	0.313491	0	0	0	0
18S	128	U	1634	1046	2680	0.315823	0	0	2180	504	2684	0.113205	0	0	2489	623	3112	0.316875	0	0	0	0		1734	803	2537	0.121303	0	0	2463	911	3374	0.127895	0	0	2938	396	3334	0.17985	0	0	0	0
18S	129	C	1962	949	2911	0.426351	0	0	3413	1010	4423	0.527594	0	0	3378	991	4369	0.575029	0	0	0	0		2814	995	3809	0.454057	0	0	3355	1920	5275	0.48947	0	0	4216	474	4690	0.499505	0	0	0	0
18S	130	G	740	640	1380	0.245877	0	0.197467	1161	705	1866	0.25846	0	0.205465	968	794	1762	0.152051	0	0.132048	0.178327	0.0328865		1106	1494	2600	0.136712	0	0	1302	891	2193	0.384088	0	0.277594	1110	933	2043	0.221314	0	0.181283	0.152959	0.115083
18S	131	C	1237	542	1779	0.139513	0	0	2337	866	3203	0.352559	0	0	1594	524	2118	0.146715	0	0	0	0		1755	834	2589	0.142467	0	0	3064	1029	4093	0.338039	0	0	1876	605	2481	0.102283	0	0	0	0
18S	132	U	514	535	1049	0.371683	0	0.271157	1685	488	2173	0.0727435	0	0	709	504	1213	0.370062	0	0.270269	0.180475	0.127616		1048	1003	2051	0.0609757	0	0.0574978	2170	837	3007	0.11882	0	0	1031	487	1518	0.369424	0	0.269896	0.109131	0.116076
18S	133	C	242	540	782	0.733007	0.0914551	0.42328	1093	643	1736	0.122983	0	0.109571	383	375	758	1.02923	0.1646	0.507533	0.346795	0.171233		802	1322	2124	0.0115033	0	0	1885	873	2758	0.0776811	0	0	555	704	1259	0.592601	0.0339517	0.372282	0.124094	0.175495
18S	134	C	63	526	589	1.05535	0.130115	0.513888	343	581	924	0.993429	0.169376	0.498622	92	343	435	2.10084	0.311989	0.678008	0.563506	0.0812047		214	991	1205	0.758218	0.187564	0.431446	764	953	1717	0.415076	0.0304104	0.293445	126	973	1099	0.668576	0.0183423	0.400905	0.375265	0.059184
18S	135	U	48	456	504	1.13146	0.114369	0.531332	286	649	935	0.753288	0.0270192	0.429905	174	432	606	0.828867	0	0.453622	0.47162	0.0433191		342	1542	1884	0.0379251	0	0.0365581	980	776	1756	0.235939	0	0.190986	158	772	930	0.822103	0.0301355	0.45145	0.226331	0.171213
18S	136	C	124	345	469	1.06078	0.184812	0.515279	390	1113	1503	0.085557	0	0	282	420	702	0.260518	0	0.206909	0.240729	0.211717		573	1291	1864	0.0179803	0	0	1025	848	1873	0.0172003	0	0	183	836	1019	0.503039	0.0404427	0.3349	0.111633	0.157873
18S	137	U	58	1040	1098	0.174472	0	0	144	508	652	1.20425	0.169277	0.546712	215	563	778	0.0926687	0	0.0849092	0.21054	0.240223		327	1368	1695	0.0590212	0	0.0557629	485	711	1196	0.493196	0.0611627	0.33048	171	664	835	0.933227	0.179296	0.483029	0.289757	0.176792
18S	138	C	718	535	1253	0.271655	0	0	557	826	1383	0.0594894	0	0	418	290	708	0.181837	0	0.154043	0.0513478	0.0726167		255	1276	1531	0.168001	0.00349342	0.143917	513	718	1231	0.282449	0.000500823	0.220382	1079	563	1642	0.00231961	0	0	0.121433	0.0913644
18S	139	C	602	452	1054	0.0930384	0	0	610	533	1143	0.156391	0	0.135343	431	269	700	0.248676	0	0.19938	0.111574	0.0831135		525	804	1329	0.351571	0.0817718	0.260265	734	610	1344	0.0704172	0	0.0658305	1359	909	2268	0.246222	0	0	0.108698	0.110492
18S	140	U	271	507	778	0.312666	0	0.238425	469	665	1134	0.177758	0	0.151042	347	509	856	0.0735252	0	0.068564	0.152677	0.0693549		357	1389	1746	0.00401959	0	0	651	706	1357	0.00922108	0	0	907	1020	1927	0.0289938	0	0	0	0
18S	141	A	317	390	707	0.528374	0.0200344	0.34603	260	312	572	1.60646	0.35372	0.61675	191	205	396	1.67962	0.407955	0.627403	0.530061	0.130203		344	1602	1946	0.0917137	0	0	533	312	845	0.626215	0.181939	0.385355	865	488	1353	0.520532	0.0267693	0.342502	0.242619	0.172447
18S	142	C	644	394	1038	0.0884932	0	0.0813708	522	1257	1779	0.120755	0	0	685	414	1099	0.0592525	0	0.0559861	0.0457856	0.0339935		455	1528	1983	0.0702061	0	0	727	405	1132	0.251986	0	0.201411	1240	764	2004	0.0962704	0	0.0878563	0.0964224	0.0824485
18S	143	U	589	920	1509	0.246093	0	0	714	1195	1909	0.132641	0	0	835	724	1559	0.205862	0	0	0	0		508	1381	1889	0.0116049	0	0	898	446	1344	0.0584965	0	0.0553026	1342	1447	2789	0.196862	0	0	0.0184342	0.0260699
18S	144	U	489	1371	1860	0.397045	0	0	793	1540	2333	0.268209	0	0	808	752	1560	0.134536	0	0	0	0		599	1588	2187	0.134816	0	0	820	628	1448	0.0114408	0	0.0113192	1825	1781	3606	0.379749	0	0	0.00377305	0.0053359
18S	145	G	438	506	944	0.344797	0	0.256595	930	750	1680	0.137484	0	0.12093	1048	384	1432	0.0803908	0	0.0744571	0.150661	0.0772723		525	1074	1599	0.256583	0.0020008	0.204293	816	527	1343	0.193097	0	0.161946	1488	1255	2743	0.113472	0	0	0.12208	0.0880375
18S	146	G	367	617	984	0.423903	0	0.297917	598	794	1392	0.572617	0	0.364284	713	598	1311	0.401651	0	0.286712	0.316304	0.0342336		331	1305	1636	0.316914	0.0312103	0.240761	542	878	1420	0.296356	0	0.228731	1058	1037	2095	0.326659	0	0.246316	0.238603	0.00733918
18S	147	A	625	502	1127	0.331324	0	0.249034	679	1247	1926	0.188053	0	0.158356	769	641	1410	0.409583	0	0.290717	0.232702	0.0552564		692	1227	1919	0.133686	0	0.117976	755	626	1381	0.464014	0.0109511	0.317103	1172	831	2003	0.495437	0	0.33141	0.255496	0.0974167
18S	148	U	495	1196	1691	0.0216443	0	0	1318	2634	3952	0.407693	0	0	1764	1367	3131	0.337896	0	0	0	0		741	2377	3118	0.321068	0	0	947	2165	3112	0.284199	0	0	2035	1594	3629	0.124389	0	0	0	0
18S	149	A	258	944	1202	0.589397	0.06171	0.371025	711	1421	2132	0.261817	0	0.207569	804	1063	1867	0.292012	0	0.226107	0.268234	0.0730772		411	1243	1654	0.454676	0.0482439	0.312692	577	1267	1844	0.533917	0	0.348197	1253	895	2148	0.700279	0.0839684	0.411974	0.357621	0.041076
18S	150	A	134	1149	1283	0.539746	0.0159772	0.350719	353	1057	1410	1.00856	0.122454	0.502308	670	1050	1720	0.456931	0	0.313751	0.388926	0.0815814		246	2216	2462	0.0646321	0	0	341	1179	1520	1.05629	0.124604	0.513851	903	818	1721	1.2557	0.240742	0.556821	0.356891	0.252969
18S	151	C	466	1392	1858	0.0770845	0	0.0716035	996	1900	2896	0.0475971	0	0	1216	1820	3036	0.185838	0	0	0.0238678	0.0337542		617	1474	2091	0.120161	0	0.107317	1080	1773	2853	0.155688	0	0.134755	1875	1307	3182	0.250892	0	0.200621	0.147564	0.039153
18S	152	U	1142	2109	3251	0.393245	0	0	2140	2523	4663	0.437271	0	0	1963	2590	4553	0.482235	0	0	0	0		1251	2468	3719	0.41486	0	0	2307	2569	4876	0.311883	0	0	3262	3774	7036	0.466858	0	0	0	0
18S	153	G	1134	1070	2204	0.0505719	0	0	1356	1267	2623	0.0668572	0	0.0626898	762	1339	2101	0.224796	0	0.183609	0.0820997	0.0762043		1145	855	2000	0.135044	0	0.119029	1770	1151	2921	0.248179	0	0.198887	1270	3320	4590	0.119386	0	0	0.105972	0.0817186
18S	154	U	1403	2505	3908	0.518763	0	0	1849	2785	4634	0.459916	0	0	970	3131	4101	0.445458	0	0	0	0		1681	1073	2754	0.23149	0	0	2866	3666	6532	0.471521	0	0	1671	5115	6786	0.447124	0	0	0	0
18S	155	G	2004	1460	3464	0.461004	0	0	1763	1280	3043	0.18917	0	0	1020	2019	3039	0.271184	0	0	0	0		2629	885	3514	0.447144	0	0	4578	2497	7075	0.503385	0	0	1921	3663	5584	0.335564	0	0	0	0
18S	156	G	703	522	1225	0.677524	0	0.40408	696	1021	1717	0.484931	0	0.326696	448	910	1358	0.68615	0.00549188	0.407111	0.379295	0.037214		644	271	915	1.41789	0.234932	0.586681	1321	1620	2941	0.42825	0	0.299914	863	2599	3462	0.0931755	0	0.0852563	0.323951	0.20541
18S	157	U	995	849	1844	0.0198494	0	0.0194735	841	1995	2836	0.170658	0	0	806	1560	2366	0.140065	0	0	0.00649115	0.00917988		957	605	1562	0.308104	0	0.23565	2216	1922	4138	0.00841588	0	0.00834765	1281	4030	5311	0.366928	0	0	0.0813326	0.109172
18S	158	A	945	989	1934	0.116032	0	0	881	1103	1984	0.15279	0	0.132598	558	1138	1696	0.116637	0	0.104509	0.0790356	0.0570509		1056	808	1864	0.0573846	0	0.0542978	2393	1167	3560	0.220793	0	0.180902	1215	2271	3486	0.0672816	0	0	0.0784	0.0757939
18S	159	A	4	9	13	121.498	0.977094	0.992415	6	74	80	26.8044	0.903369	0.964463	8	19	27	63.204	0.956558	0.984973	0.980617	0.0118199	1	5	21	26	75.0872	0.96412	0.987338	14	31	45	101.367	0.974352	0.990442	23	32	55	54.5466	0.956039	0.982313	0.986697	0.00334927	1
18S	160	U	565	309	874	0.625803	0	0.38519	544	1152	1696	0.102298	0	0.0928541	414	764	1178	0.257469	0	0.20489	0.227645	0.120425		569	1119	1688	0.0424709	0	0.0407638	3199	1190	4389	0.0708023	0	0	1020	109	1129	1.25853	0.0830951	0.557452	0.199405	0.253723
18S	161	U	621	720	1341	0.149006	0	0	415	805	1220	0.386668	0	0.279012	456	817	1273	0.030996	0	0	0.093004	0.131527		633	2048	2681	0.409442	0	0	3729	1364	5093	0.257325	0	0	1178	347	1525	0.33827	0	0.25289	0.0842968	0.119214
18S	162	C	557	869	1426	0.323227	0	0	897	1758	2655	0.471139	0	0	438	1227	1665	0.374256	0	0	0	0		371	2013	2384	0.36894	0	0	4162	2091	6253	0.449217	0	0	1322	290	1612	0.0687814	0	0.0643924	0.0214641	0.0303548
18S	163	U	474	716	1190	0.183525	0	0	779	1345	2124	0.337333	0	0	431	895	1326	0.209512	0	0	0	0		434	1345	1779	0.104544	0	0	2480	1912	4392	0.167552	0	0	1335	348	1683	0.0762404	0	0	0	0
18S	164	A	452	347	799	0.169361	0	0.144987	668	1143	1811	0.271584	0	0	455	648	1103	0.101379	0	0	0.0483291	0.0683476		429	1829	2258	0.340155	0	0	3921	1732	5653	0.398866	0	0	837	997	1834	0.278183	0	0	0	0
18S	165	G	378	515	893	0.0489187	0	0	467	807	1274	0.0193638	0	0.0190106	444	305	749	0.335437	0	0.251433	0.0901477	0.114309		457	1059	1516	0.00532484	0	0	2447	1474	3921	0.122486	0	0	529	683	1212	0.0757351	0	0.0704571	0.0234857	0.0332138
18S	166	A	2	6	8	103.069	0.971735	0.99145	6	7	13	98.6365	0.970838	0.990674	6	13	19	52.7811	0.945757	0.982319	0.988148	0.0041333	1	4	33	37	41.931	0.936368	0.977306	33	28	61	59.457	0.955684	0.983722	13	25	38	36.0114	0.923226	0.973656	0.978228	0.00416079	1
18S	167	G	261	364	625	0.364679	0	0.26754	368	476	844	0.463274	0	0.316857	313	238	551	0.856421	0.0055782	0.46178	0.348726	0.0824377		402	1136	1538	0.105119	0	0	1183	925	2108	0.538143	0	0.349973	394	309	703	1.02696	0.0809	0.507005	0.285659	0.211921
18S	168	C	341	595	936	0.206581	0	0	527	643	1170	0.0574248	0	0	456	486	942	0.020985	0	0	0	0		532	755	1287	0.0468944	0	0	1905	1183	3088	0.106701	0	0	627	997	1624	0.219043	0	0	0	0
18S	169	U	439	983	1422	0.540564	0	0	598	661	1259	0.186146	0	0	531	901	1432	0.380685	0	0	0	0		776	765	1541	0.298307	0	0	1939	1581	3520	0.316372	0	0	751	1042	1793	0.244073	0	0	0	0
18S	170	A	290	448	738	0.0274545	0	0	477	759	1236	0.179934	0	0	291	1034	1325	0.24762	0	0	0	0		685	520	1205	0.148176	0	0	2130	1212	3342	0.335922	0	0	632	1309	1941	0.228361	0	0	0	0
18S	171	A	440	371	811	0.156951	0	0	410	787	1197	0.207986	0	0	396	1003	1399	0.265786	0	0	0	0		895	405	1300	0.27431	0	0	1518	959	2477	0.202565	0	0	567	1302	1869	0.15921	0	0	0	0
18S	172	U	8	9	17	42.1944	0.907678	0.978107	17	15	32	35.434	0.869439	0.973363	61	18	79	14.6383	0.750339	0.936803	0.962758	0.0184544	1	44	12	56	17.4144	0.813587	0.946597	55	40	95	20.7625	0.825234	0.954506	41	131	172	10.0451	0.687008	0.909938	0.937014	0.0194157	1
18S	173	A	688	283	971	0.246296	0	0	604	740	1344	0.068005	0	0	436	1078	1514	0.224224	0	0	0	0		823	338	1161	0.187952	0	0	1413	549	1962	0.00945831	0	0	624	1632	2256	0.174332	0	0	0	0
18S	174	C	22	17	39	21.1533	0.871719	0.955939	11	34	45	30.7848	0.881187	0.969201	18	32	50	26.3828	0.880545	0.964171	0.963104	0.00546672	1	10	18	28	34.6751	0.920618	0.97291	35	73	108	18.0565	0.838725	0.947981	20	174	194	10.3347	0.752314	0.912188	0.944359	0.0249214	1
18S	175	A	588	384	972	0.15334	0	0	828	1038	1866	0.314902	0	0	428	1450	1878	0.353811	0	0	0	0		595	352	947	0.0118378	0	0	1505	900	2405	0.259804	0	0	823	2502	3325	0.427066	0	0	0	0
18S	176	U	181	900	1081	0.170497	0	0	413	1592	2005	0.346156	0	0	150	2634	2784	0.596984	0	0	0	0		242	509	751	0.358924	0	0.264383	945	1281	2226	0.223554	0	0	491	3570	4061	0.550271	0	0	0.0881275	0.124631
18S	177	G	25	466	491	1.23489	0.142873	0.553054	67	339	406	2.80393	0.0850407	0.73759	31	1242	1273	0.0157248	0	0.0154933	0.435379	0.306313		127	1419	1546	0.339417	0	0	42	670	712	1.60723	0.196058	0.616783	34	2056	2090	0.0341835	0	0	0.205594	0.290754
18S	178	C	246	767	1013	0.185843	0	0.156848	430	2848	3278	0.605435	0	0	247	1233	1480	0.125418	0	0	0.0522827	0.073939		372	790	1162	0.108455	0	0.0979195	1035	1100	2135	0.145188	0	0	327	2419	2746	0.296578	0	0	0.0326398	0.0461597
18S	179	C	338	957	1295	0.0314901	0	0.0305516	344	2836	3180	0.571043	0	0	230	932	1162	0.180883	0	0.153288	0.0612797	0.0662441		352	474	826	0.828013	0	0.453258	1561	1018	2579	0.230073	0	0	632	1826	2458	0.199431	0	0	0.151086	0.213668
18S	180	G	480	859	1339	0.0828607	0	0.076573	380	452	832	1.04371	0	0.510994	371	554	925	0.476554	0	0.322984	0.303517	0.177885		304	637	941	0.975383	0	0.494035	955	327	1282	0.818646	0.0476644	0.450333	359	1005	1364	0.498453	0	0.332808	0.425725	0.0680817
18S	181	A	761	667	1428	0.105832	0	0.0957638	384	207	591	1.99107	0.211511	0.666047	427	514	941	0.477058	0.00217222	0.323211	0.361674	0.2344		308	1064	1372	0.601667	0.0155665	0.375821	979	1863	2842	0.148028	0	0	402	1062	1464	0.403413	0.00294158	0.287591	0.221138	0.160463
18S	182	C	1242	1127	2369	0.348795	0	0	732	504	1236	0.387515	0	0.27945	575	734	1309	0.0194317	0	0	0.0931499	0.131734		771	1491	2262	0.0172632	0	0.0169776	1489	428	1917	0.456998	0.00213301	0.31377	713	396	1109	0.807958	0.118555	0.447113	0.259287	0.179778
18S	183	G	1320	948	2268	0.281465	0	0	799	571	1370	0.262744	0	0.208194	638	575	1213	0.00890536	0	0	0.0693981	0.0981437		959	1222	2181	0.141328	0	0.123877	981	928	1909	0.709692	0.0557934	0.415226	582	621	1203	0.622019	0.0891668	0.383681	0.307595	0.130545
18S	184	G	1472	1111	2583	0.382185	0	0	1424	554	1978	0.155011	0	0	1034	952	1986	0.463367	0	0	0	0		1457	2957	4414	0.481586	0	0	2526	1455	3981	0.137357	0	0	976	1117	2093	0.119728	0	0	0	0
18S	185	G	1121	592	1713	0.0498444	0	0	597	444	1041	0.570345	0	0.36342	563	511	1074	0.0196072	0	0.0192477	0.127556	0.166966		1187	857	2044	0.274415	0	0.215409	1827	1142	2969	0.29859	0	0.229993	487	701	1188	0.605196	0.0451304	0.377221	0.274208	0.0730842
18S	186	C	860	902	1762	0.138848	0	0	983	2024	3007	0.578531	0	0	614	505	1119	0.086121	0	0	0	0		5458	648	6106	0.653012	0	0	2335	2071	4406	0.111628	0	0	799	1723	2522	0.317189	0	0	0	0
18S	187	G	550	824	1374	0.0434586	0	0.0416776	586	627	1213	0.178949	0	0.151893	589	302	891	0.101258	0	0.0920413	0.0952041	0.0450509		3886	738	4624	0.529235	0	0	2224	1578	3802	0.109647	0	0.0988362	776	1122	1898	0.052788	0	0	0.0329454	0.0465918
18S	188	C	504	790	1294	0.00015444	0	0	537	1859	2396	0.489343	0	0	438	521	959	0.0616667	0	0	0	0		1226	526	1752	0.31338	0	0.23871	2351	3280	5631	0.273793	0	0	988	1505	2493	0.32285	0	0	0.0795699	0.112529
18S	189	U	205	1608	1813	0.432476	0	0	309	1962	2271	0.51341	0	0	203	875	1078	0.27439	0	0	0	0		429	931	1360	0.515128	0	0.340155	1718	6722	8440	0.550195	0	0	858	2406	3264	0.524598	0	0	0.113385	0.16035
18S	190	G	30	378	408	1.43583	0.321005	0.590055	51	347	398	1.91919	0.321822	0.658004	23	471	494	0.517486	0.0606882	0.34147	0.529843	0.136058		64	455	519	2.62656	0.33384	0.724641	271	4738	5009	0.178847	0	0	139	1313	1452	0.146815	0	0.128097	0.284246	0.315767
18S	191	A	2	259	261	2.11756	0.384369	0.680069	9	333	342	1.85986	0.213658	0.650997	8	386	394	0.591111	0.111859	0.3721	0.567722	0.138834		20	759	779	0.917151	0	0.478713	71	4280	4351	0.0977762	0	0	20	1285	1305	0.169321	0	0.144898	0.20787	0.200442
18S	192	C	13	361	374	0.806133	0.0303232	0.446991	18	338	356	1.38646	0.0726572	0.581652	11	447	458	0.197846	0	0.165469	0.398037	0.173396		70	539	609	1.13585	0	0.53221	169	3272	3441	0.0961134	0	0.0877089	28	1117	1145	0.238918	0	0.19298	0.270966	0.189661
18S	193	C	43	260	303	0.861769	0	0.463696	42	235	277	1.34273	0	0.574028	32	323	355	0.383052	0	0.277525	0.438416	0.12236		215	261	476	0.964524	0	0.491495	248	2664	2912	0.182317	0	0.154248	90	874	964	0.286126	0	0.22265	0.289464	0.145561
18S	194	C	96	160	256	0.880545	0	0.46921	58	167	225	1.47227	0	0.596581	61	333	394	0.102419	0	0.0931178	0.386303	0.213735		283	249	532	0.264645	0	0.209575	291	2075	2366	0.329409	0	0.247865	134	538	672	0.666815	0.00708556	0.40041	0.28595	0.0824314
18S	195	C	53	198	251	0.623369	0	0.384938	35	220	255	0.598785	0	0.375442	47	216	263	0.494823	0	0.331866	0.364082	0.0231079		174	270	444	0.34407	0	0.25642	222	1833	2055	0.328459	0	0.247339	108	757	865	0.0659995	0	0.0619804	0.18858	0.0895959
18S	196	C	108	208	316	0.0117771	0	0	99	227	326	0.12912	0	0	114	192	306	0.0884546	0	0.0815101	0.02717	0.0384242		263	283	546	0.0404428	0	0	351	1538	1889	0.157578	0	0.136189	143	539	682	0.0904506	0	0.0830595	0.073083	0.0560449
18S	197	C	129	221	350	0.164103	0	0	51	204	255	0.103906	0	0.0944602	76	171	247	0.270833	0	0.213793	0.102751	0.0874773		332	230	562	0.113381	0	0	584	1223	1807	0.0100541	0	0.00995946	302	399	701	0.0872745	0	0	0.00331982	0.00469493
18S	198	U	212	251	463	0.423348	0	0	144	193	337	0.205523	0	0	152	229	381	0.270506	0	0	0	0		308	291	599	0.239056	0	0	503	1132	1635	0.0623132	0	0	317	168	485	0.207567	0	0.172182	0.0573941	0.0811675
18S	199	U	137	182	319	0.137049	0	0	127	154	281	0.00571316	0	0.00570081	144	180	324	0.169949	0	0	0.00190027	0.00268739		184	342	526	0.168522	0	0	331	596	927	0.50898	0.075904	0.337542	255	90	345	0.646532	0.0717217	0.393353	0.243632	0.173774
18S	200	C	144	138	282	0.0429525	0	0.0413236	99	206	305	0.00453885	0	0.00453309	143	174	317	0.153634	0	0	0.0152856	0.0185044		253	217	470	0.0966973	0	0	406	663	1069	0.177664	0	0.150981	259	223	482	0.126501	0	0.112502	0.0878277	0.0640595
18S	201	C	111	123	234	0.49896	0	0.333818	71	123	194	0.958803	0.0675753	0.490769	75	128	203	0.461383	0	0.316779	0.380456	0.0783129		232	185	417	0.00738969	0	0	349	548	897	0.387986	0	0.279756	202	189	391	0.484807	0	0.327074	0.202277	0.14433
18S	202	C	48	161	209	1.34037	0	0.573885	71	146	217	1.50454	0	0.601827	58	142	200	0.90492	0	0.476287	0.550666	0.0538167		103	211	314	0.51425	0	0.340321	126	548	674	1.19508	0	0.544803	126	188	314	1.10459	0.10491	0.52564	0.470255	0.0922096
18S	203	G	26	80	106	5.34839	0.375151	0.843722	18	223	241	2.123	0.0593803	0.680696	25	97	122	3.18799	0.212222	0.762702	0.762373	0.0665554	1	42	149	191	2.01562	0.15105	0.66955	78	242	320	4.69232	0.415378	0.824776	63	141	204	2.86607	0.424688	0.742276	0.745534	0.0634125
18S	204	G	29	63	92	8.01601	0.641478	0.890148	30	263	293	2.25283	0.261534	0.693301	24	103	127	3.98047	0.432804	0.800471	0.79464	0.0804682	1	61	163	224	1.84291	0.169923	0.649263	177	327	504	3.19199	0.388843	0.76181	179	243	422	1.09089	0.215274	0.522324	0.644466	0.0978284
18S	205	G	299	52	351	1.62841	0.181999	0.620212	304	229	533	1.04536	0.0912465	0.511557	174	129	303	1.31959	0.128397	0.569697	0.567155	0.0443947		229	92	321	1.18054	0.106713	0.54217	865	266	1131	1.08584	0.148553	0.520797	776	194	970	0.0146355	0	0.0144391	0.359135	0.243893
18S	206	G	656	44	700	0.429941	0	0.300971	606	131	737	0.646266	0	0.392888	382	75	457	0.693571	0	0.41006	0.367973	0.0478936		327	51	378	1.09666	0.165986	0.52371	1832	85	1917	0.329371	0	0.247862	964	34	998	0.143188	0	0.125363	0.298978	0.166593
18S	207	G	1210	26	1236	0.128815	0	0	1211	21	1232	0.0530233	0	0.0503922	720	30	750	0.110445	0	0.0995798	0.0499907	0.0406543		452	34	486	0.839357	0.170363	0.456842	2508	21	2529	0.0697848	0	0.0652567	1188	19	1207	0.00545438	0	0.00542926	0.175843	0.200192
18S	208	G	2458	98	2556	0.573098	0	0	2885	62	2947	0.55329	0	0	1691	55	1746	0.523895	0	0	0	0		1479	97	1576	0.435454	0	0	5978	51	6029	0.562265	0	0	1865	81	1946	0.343725	0	0	0	0
18S	209	G	2518	315	2833	0.59119	0	0	3015	261	3276	0.580378	0	0	1916	232	2148	0.605749	0	0	0	0		1723	331	2054	0.556383	0	0	6033	213	6246	0.554261	0	0	1894	273	2167	0.393414	0	0	0	0
18S	210	G	1524	430	1954	0.335965	0	0	2008	483	2491	0.380284	0	0	1343	321	1664	0.436964	0	0	0	0		764	458	1222	0.131335	0	0	4010	850	4860	0.374633	0	0	1336	401	1737	0.193172	0	0	0	0
18S	211	A	584	332	916	0.596232	0	0.37378	986	388	1374	0.217261	0	0.17859	602	229	831	0.271902	0	0.213978	0.255449	0.0849105		599	559	1158	0.039258	0	0	1694	2052	3746	0.160428	0	0	1221	910	2131	0.364441	0	0	0	0
18S	212	U	172	520	692	1.24974	0.129655	0.55586	239	645	884	0.936798	0	0.483966	208	459	667	0.647804	0	0.393489	0.477772	0.066432		183	1146	1329	0.15477	0	0	573	1331	1904	0.741073	0.0120946	0.42577	440	1309	1749	0.211835	0	0	0.141923	0.20071
18S	213	G	369	748	1117	0.343063	0	0.255604	521	377	898	0.846447	0	0.458696	288	444	732	0.45601	0	0.313485	0.342595	0.0854288		394	938	1332	0.134384	0	0	692	572	1264	1.56712	0.227674	0.610647	450	270	720	0.996471	0.166149	0.499463	0.370037	0.265563
18S	214	C	798	1116	1914	0.299663	0	0	1230	1347	2577	0.47039	0	0	564	625	1189	0.193063	0	0	0	0		627	738	1365	0.173206	0	0	1069	2927	3996	0.321019	0	0	835	1052	1887	0.364648	0	0	0	0
18S	215	G	542	605	1147	0.148277	0	0.129228	439	446	885	0.555066	0	0.3572	409	209	618	0.504882	0	0.335857	0.274095	0.102806		554	139	693	0.726913	0.114152	0.421284	702	1142	1844	0.409714	0	0.290748	349	194	543	1.26379	0.225707	0.558716	0.423583	0.10941
18S	216	U	417	274	691	0.7658	0	0.43404	660	882	1542	0.289177	0	0	358	289	647	0.256156	0	0.204171	0.212737	0.177299		519	143	662	0.679487	0.0794996	0.404944	697	1319	2016	0.105178	0	0.0952113	523	93	616	0.760364	0.0296287	0.432334	0.31083	0.152875
18S	217	G	339	1080	1419	0.256385	0	0	491	285	776	0.343529	0	0.255937	330	615	945	0.245208	0	0	0.0853123	0.12065		573	330	903	0.244408	0	0.19658	780	769	1549	0.352688	0	0.260856	386	328	714	0.396395	0	0.284155	0.247197	0.0370341
18S	218	C	501	1716	2217	0.57885	0	0	449	631	1080	0.138843	0	0	314	953	1267	0.476358	0	0	0	0		529	478	1007	0.221991	0	0.181811	997	1708	2705	0.298727	0	0	593	765	1358	0.371466	0	0	0.0606036	0.0857064
18S	219	A	326	610	936	0.131756	0	0.116527	372	311	683	0.404321	0	0.288212	200	279	479	0.57044	0.0451995	0.363718	0.256153	0.10343		443	849	1292	0.020727	0	0.0203215	675	974	1649	0.254263	0	0.202817	346	491	837	0.079581	0	0.0737963	0.0989782	0.0766017
18S	220	U	240	211	451	1.32623	0.198217	0.570662	255	233	488	0.932152	0.0580526	0.482953	219	139	358	1.09613	0.193385	0.523626	0.525747	0.0358384		347	321	668	1.27931	0.215379	0.561638	653	341	994	1.21151	0.216421	0.54807	281	74	355	1.80581	0.265191	0.644241	0.58465	0.0424999
18S	221	U	291	678	969	0.0807216	0	0	311	347	658	0.228494	0	0.186225	240	316	556	0.243706	0	0.196235	0.127487	0.0902394		562	1426	1988	0.218127	0	0	769	744	1513	0.343314	0	0.255698	479	279	758	0.246889	0	0.198214	0.151304	0.109532
18S	222	U	142	166	308	1.94441	0.28207	0.6611	208	232	440	0.865457	0.115557	0.464503	229	157	386	0.820126	0.0995746	0.451228	0.52561	0.0959587		327	245	572	2.27861	0.404986	0.695363	616	754	1370	0.517003	0.0374027	0.340969	309	228	537	0.943123	0.193791	0.485829	0.507387	0.145481
18S	223	A	133	470	603	0.408591	0	0.290412	180	481	661	0.169856	0	0.145381	285	374	659	0.0195286	0	0.0191831	0.151659	0.110818		442	1538	1980	0.0528297	0	0	749	1697	2446	0.192095	0	0	443	548	991	0.0925291	0	0.0847708	0.0282569	0.0399613
18S	224	U	348	430	778	0.005634	0	0.0056096	358	361	719	0.107299	0	0.0970236	352	505	857	0.233942	0	0	0.0342111	0.0444742		535	2530	3065	0.385848	0	0	855	2231	3086	0.371162	0	0	585	645	1230	0.0587418	0	0	0	0
18S	225	C	567	473	1040	0.354744	0	0	584	782	1366	0.468658	0	0	564	407	971	0.359934	0	0	0	0		1076	1744	2820	0.299842	0	0	1004	2134	3138	0.403511	0	0	854	884	1738	0.341793	0	0	0	0
18S	226	A	473	250	723	0.0197514	0	0	546	282	828	0.0111111	0	0	445	269	714	0.0482362	0	0	0	0		744	1872	2616	0.231813	0	0	671	1751	2422	0.19673	0	0	760	664	1424	0.119821	0	0	0	0
18S	227	G	348	318	666	0.12567	0	0.111789	441	232	673	0.314705	0	0.239643	389	194	583	0.268113	0	0.211712	0.187715	0.0548851		572	2679	3251	0.407117	0	0	657	837	1494	0.395444	0.0215618	0.283518	667	711	1378	0.0342277	0	0	0.094506	0.133652
18S	228	A	405	127	532	0.478049	0.0484019	0.323843	477	272	749	0.238637	0	0.192869	333	137	470	0.658363	0.12386	0.397505	0.304739	0.0846274		512	1332	1844	0.0795905	0	0.0737599	522	1130	1652	0.261988	0	0.207699	723	584	1307	0.0527098	0	0.050107	0.110522	0.0693898
18S	229	U	349	320	669	0.283831	0	0.221339	479	507	986	0.00454801	0	0	325	303	628	0.32042	0.0240542	0.242958	0.154765	0.109791		702	1187	1889	0.04495	0	0.0430382	609	1031	1640	0.342298	0	0.255125	762	842	1604	0.116421	0	0	0.0993877	0.111516
18S	230	C	301	505	806	0.15634	0	0.135348	574	478	1052	0.0333439	0	0.0322976	523	473	996	0.127672	0	0	0.0558818	0.0577172		958	856	1814	0.0611203	0	0.0576297	690	1073	1763	0.312743	0	0.238339	975	844	1819	0.187741	0	0	0.0986562	0.101534
18S	231	A	326	379	705	0.4243	0.0627734	0.298197	420	406	826	0.428322	0.0359311	0.300132	357	315	672	0.409955	0.0278537	0.291064	0.296464	0.00389921		784	409	1193	0.546166	0.0792991	0.35343	578	792	1370	0.777664	0.133227	0.437644	702	608	1310	0.203382	0	0.169116	0.320063	0.112136
18S	232	A	422	510	932	0.0954269	0	0.0871992	395	630	1025	0.176262	0	0.149973	276	633	909	0.0452381	0	0.0433257	0.0934994	0.043766		834	340	1174	0.464132	0.020265	0.317186	666	1180	1846	0.342922	0.034278	0.255458	742	731	1473	0.0557591	0	0.0528482	0.208498	0.112909
18S	233	A	260	828	1088	0.0112029	0	0	329	884	1213	0.052883	0	0.0502662	342	786	1128	0.138293	0	0	0.0167554	0.0236957		587	372	959	0.732824	0.0982598	0.423162	654	1658	2312	0.130105	0	0.115171	631	576	1207	0.352391	0.0503043	0.260729	0.266354	0.1258
18S	234	A	223	994	1217	0.0504744	0	0	333	1031	1364	0.0235735	0	0.023047	237	673	910	0.168496	0	0.144335	0.0557939	0.0633109		546	581	1127	0.40134	0.0411017	0.286578	464	2069	2533	0.130211	0	0.11525	451	679	1130	0.49163	0.112356	0.329788	0.243872	0.0926445
18S	235	C	372	1325	1697	0.285761	0	0	417	1214	1631	0.0731822	0	0	512	914	1426	0.238955	0	0	0	0		867	984	1851	0.187563	0	0	802	3196	3998	0.257128	0	0	860	977	1837	0.08609	0	0	0	0
18S	236	C	487	1324	1811	0.308787	0	0	708	1641	2349	0.349641	0	0	818	992	1810	0.400153	0	0	0	0		1526	880	2406	0.403324	0	0	1239	3433	4672	0.347307	0	0	1448	1080	2528	0.339563	0	0	0	0
18S	237	A	386	870	1256	0.106523	0	0.0963379	563	784	1347	0.312372	0	0.238156	470	601	1071	0.110717	0	0.0997646	0.144753	0.0660607		986	381	1367	0.127502	0	0.113157	939	2545	3484	0.0416451	0	0	882	973	1855	0.0576928	0	0	0.0377189	0.0533426
18S	238	A	261	795	1056	0.44723	0.0405153	0.309227	591	911	1502	0.29036	0	0.225139	362	533	895	0.438492	0.0351053	0.305064	0.27981	0.0386958		910	349	1259	0.240767	0	0.194171	829	2433	3262	0.077519	0	0.0719626	690	783	1473	0.233431	0	0.189358	0.151831	0.0565093
18S	239	C	558	731	1289	0.221593	0	0.181512	915	792	1707	0.19382	0	0.162432	487	503	990	0.339287	0.0197425	0.253525	0.199157	0.0392255		1167	392	1559	0.0288675	0	0	1772	1980	3752	0.0646801	0	0	975	1031	2006	0.135996	0	0	0	0
18S	240	C	836	830	1666	0.0636939	0	0	1543	794	2337	0.125972	0	0	878	415	1293	0.00534089	0	0	0	0		1520	471	1991	0.280667	0	0	2517	1740	4257	0.187762	0	0	915	832	1747	0.00687135	0	0	0	0
18S	241	C	819	1110	1929	0.213541	0	0	1512	1020	2532	0.192337	0	0	978	566	1544	0.188659	0	0	0	0		1105	507	1612	0.0962733	0	0	2463	1942	4405	0.240785	0	0	1296	855	2151	0.237319	0	0	0	0
18S	242	G	686	436	1122	0.394182	0	0.282914	1081	836	1917	0.104374	0	0.0945541	843	323	1166	0.0872893	0	0.0803449	0.152604	0.0923254		1078	385	1463	0.0319444	0	0	2130	418	2548	0.33982	0.0480878	0.253705	1775	581	2356	0.351742	0	0	0.0845684	0.119598
18S	243	G	1596	307	1903	0.264332	0	0	1817	777	2594	0.250233	0	0	978	250	1228	0.029934	0	0	0	0		1196	136	1332	0.00692673	0	0.00688421	2534	837	3371	0.0792738	0	0	931	403	1334	0.122139	0	0.108918	0.0386006	0.0498009
18S	244	U	1979	592	2571	0.509828	0	0	2531	970	3501	0.496148	0	0	1452	628	2080	0.492562	0	0	0	0		1066	200	1266	0.0400333	0	0.0385216	2779	722	3501	0.171318	0	0	1136	371	1507	0.106617	0	0	0.0128405	0.0181592
18S	245	G	1452	352	1804	0.301028	0	0	1530	703	2233	0.200463	0	0	1266	330	1596	0.337118	0	0	0	0		636	276	912	0.441731	0.0854691	0.306622	1676	831	2507	0.121146	0	0.108094	467	452	919	0.42965	0.0795572	0.300757	0.238491	0.0922358
18S	246	A	586	527	1113	0.0895771	0	0.0822805	908	728	1636	0.0391027	0	0.0376533	349	362	711	0.518493	0.0715839	0.341768	0.153901	0.134086		348	283	631	1.03318	0.227079	0.508554	1170	1544	2714	0.0708901	0	0	154	681	835	0.420906	0.030871	0.296473	0.268343	0.208567
18S	247	G	333	356	689	0.621417	0.0729636	0.383598	592	535	1127	0.36648	0	0.268367	422	268	690	0.423107	0	0.297615	0.316527	0.048907		510	873	1383	0.19719	0	0	748	945	1693	0.381274	0	0.276149	438	345	783	0.357072	0	0.263367	0.179839	0.127272
18S	248	C	423	320	743	0.280078	0	0.219027	782	552	1334	0.0258593	0	0	606	291	897	0.0564835	0	0	0.0730091	0.10325		627	809	1436	0.283283	0	0	852	1822	2674	0.285259	0	0	259	794	1053	0.161849	0	0	0	0
18S	249	U	107	352	459	0.916353	0.10234	0.478718	128	388	516	1.3559	0.223482	0.576007	78	440	518	0.547013	0.0153255	0.354034	0.469586	0.0908496		151	1075	1226	0.203387	0	0	168	1775	1943	0.0864483	0	0	39	734	773	0.0143842	0	0.0141983	0.00473275	0.00669313
18S	250	C	161	362	523	0.424364	0	0.298332	195	335	530	0.937456	0.0434548	0.48433	93	525	618	0.157117	0	0.135973	0.306212	0.142325		246	1007	1253	0.269086	0	0	250	1185	1435	0.110407	0	0.0994917	67	493	560	0.366053	0	0.268314	0.122602	0.110751
18S	251	C	159	256	415	0.459455	0	0.315332	260	285	545	0.481868	0	0.325579	157	375	532	0.139462	0	0.122595	0.254502	0.0933661		265	666	931	0.0458274	0	0	353	872	1225	0.104849	0	0.0949688	96	744	840	0.181424	0	0	0.0316563	0.0447687
18S	252	C	86	232	318	0.616684	0.0551378	0.382191	167	579	746	0.13375	0	0	112	325	437	0.205327	0	0.170673	0.184288	0.156326		230	490	720	0.178826	0	0.151877	264	517	781	0.541574	0.0494284	0.351604	90	472	562	0.229663	0	0.187039	0.230173	0.0870562
18S	253	U	10	472	482	0.0863124	0	0	40	227	267	1.2893	0.211306	0.564105	18	395	413	0.192163	0	0.161516	0.241874	0.237201		59	510	569	0.449669	0.0698044	0.310563	31	551	582	0.821727	0.0901506	0.451495	3	305	308	1.29547	0.244329	0.565156	0.442405	0.104136
18S	254	C	12	293	305	0.431191	0.0127819	0.301971	11	454	465	0.172508	0	0.147397	10	351	361	0.30795	0	0.235943	0.228437	0.0633271		27	411	438	0.795242	0.136215	0.443535	33	366	399	1.462	0.194989	0.59443	9	214	223	2.269	0.415436	0.695045	0.57767	0.10336
18S	255	C	53	433	486	0.188341	0	0	109	395	504	0.0165016	0	0	36	362	398	0.108744	0	0.0983008	0.0327669	0.0463394		42	379	421	0.829489	0.103118	0.453987	191	320	511	0.609527	0	0.37916	92	512	604	0.136988	0	0.120659	0.317935	0.142801
18S	256	C	100	481	581	0.357236	0	0	248	429	677	0.300541	0	0	248	387	635	0.357285	0	0	0	0		406	394	800	0.0842974	0	0	443	565	1008	0.323114	0	0	313	769	1082	0.358757	0	0	0	0
18S	257	G	39	337	376	0.0069555	0	0.0069257	155	259	414	0.18407	0	0.155772	97	284	381	0.0879581	0	0.081042	0.0812466	0.0607664		295	364	659	0.127828	0	0.113493	188	223	411	0.682605	0.0384287	0.40627	312	669	981	0.232553	0	0	0.173254	0.171157
18S	258	G	56	168	224	0.669235	0.0926523	0.401993	73	209	282	0.726541	0.0992867	0.42167	54	172	226	0.818796	0.142343	0.451279	0.424981	0.0202564		143	247	390	0.97613	0.154197	0.4946	96	350	446	0.437609	0	0.304875	107	487	594	0.350532	0	0.259875	0.353117	0.101717
18S	259	C	42	231	273	0.320195	0	0.243208	137	279	416	0.0774847	0	0.072073	106	189	295	0.332508	0	0.250169	0.188484	0.0823638		431	177	608	0.263383	0	0.208745	207	766	973	0.411522	0	0	125	613	738	0.0893851	0	0.082153	0.0969661	0.0858613
18S	260	U	26	352	378	0.0982996	0	0	89	501	590	0.23087	0	0	60	378	438	0.145887	0	0	0	0		280	691	971	0.231939	0	0	126	752	878	0.328087	0	0	58	926	984	0.183914	0	0	0	0
18S	261	C	65	345	410	0.181103	0	0	81	481	562	0.149418	0	0	104	416	520	0.294391	0	0	0	0		336	1031	1367	0.464344	0	0	138	317	455	0.430482	0	0.301397	197	552	749	0.159319	0	0.137583	0.146327	0.1232
18S	262	C	49	295	344	0.0351691	0	0	85	431	516	0.0596175	0	0	60	427	487	0.255533	0	0	0	0		375	898	1273	0.405137	0	0	140	509	649	0.00396581	0	0.00395621	294	1243	1537	0.472656	0	0	0.00131874	0.00186498
18S	263	G	36	252	288	0.133718	0	0.118307	87	258	345	0.458992	0.00273676	0.31522	45	223	268	0.365138	0.00830846	0.268204	0.23391	0.0839668		258	603	861	0.0662155	0	0	143	302	445	0.544195	0.0234221	0.352926	207	803	1010	0.155424	0	0	0.117642	0.166371
18S	264	G	35	99	134	1.59934	0.372589	0.617046	106	171	277	0.92458	0.168111	0.481306	31	189	220	0.690096	0.122436	0.409414	0.502588	0.0860909		205	271	476	0.834941	0.0871712	0.455544	125	235	360	1.10419	0.217408	0.525449	140	377	517	0.795903	0.0888183	0.443654	0.474882	0.0360839
18S	265	C	52	250	302	0.115695	0	0.104005	76	238	314	0.780776	0.172128	0.43923	52	242	294	0.257439	0	0.205286	0.249507	0.140382		244	441	685	0.28484	0	0.221945	191	419	610	0.267612	0	0.211388	182	375	557	0.681701	0.0718458	0.405796	0.27971	0.0892608
18S	266	C	54	377	431	0.212912	0	0	54	721	775	0.310452	0	0	46	345	391	0.0454649	0	0	0	0		209	284	493	0.988754	0.152182	0.497679	147	610	757	0.0624597	0	0.0588609	227	374	601	0.593466	0.0651843	0.372826	0.309789	0.184609
18S	267	G	54	310	364	0.0308676	0	0.0300231	90	770	860	0.304478	0	0	48	400	448	0.072779	0	0	0.0100077	0.014153		292	508	800	0.362408	0	0.26625	228	541	769	0.2129	0	0.175718	343	547	890	0.138172	0	0.121518	0.187829	0.0597038
18S	268	G	123	227	350	0.25334	0	0.202592	147	358	505	0.428107	0	0.300188	88	237	325	0.538991	0	0.350923	0.284568	0.0615549		507	200	707	0.867765	0.00567725	0.464952	356	703	1059	0.0465618	0	0.0445304	399	890	1289	0.109828	0	0	0.169828	0.209475
18S	269	G	295	96	391	0.312217	0	0.238394	360	217	577	0.372972	0	0.271996	218	86	304	0.899709	0.0599347	0.474422	0.328271	0.104251		902	88	990	0.510136	0	0.338034	643	529	1172	0.120811	0	0.107871	777	60	837	0.629064	0	0.386434	0.277446	0.121525
18S	270	G	363	82	445	0.27581	0	0.216565	454	235	689	0.23161	0	0.188276	300	139	439	0.414672	0	0.293594	0.232812	0.0445041		1215	127	1342	0.178291	0	0.151409	800	524	1324	0.117996	0	0.105614	1024	432	1456	0.0314878	0	0	0.0856741	0.0634
18S	271	G	173	98	271	1.45302	0.293063	0.593229	346	281	627	0.521568	0.0385327	0.343142	216	132	348	0.971251	0.104025	0.493425	0.476599	0.102788		920	148	1068	0.640713	0	0.390732	504	374	878	0.948869	0.161951	0.487166	678	131	809	1.06708	0.136624	0.516534	0.464811	0.0537363
18S	272	U	276	237	513	0.367121	0.0209374	0.268918	379	300	679	0.519771	0.090345	0.342337	301	260	561	0.26552	0	0.210106	0.273787	0.0540928		1000	1051	2051	0.144488	0	0	567	772	1339	0.335896	0	0.251579	818	287	1105	0.619038	0.0419592	0.382563	0.211381	0.158746
18S	273	C	133	665	798	0.00453344	0	0.00451862	215	1480	1695	0.390992	0	0	124	1149	1273	0.453262	0	0	0.00150621	0.0021301		643	2602	3245	0.459345	0	0	469	2097	2566	0.281483	0	0	692	1632	2324	0.198891	0	0	0	0
18S	274	G	662	682	1344	0.3114	0	0	881	791	1672	0.270605	0	0	701	857	1558	0.511838	0	0	0	0		2317	2042	4359	0.609396	0	0	1480	1821	3301	0.388674	0	0	2372	1129	3501	0.424246	0	0	0	0
18S	275	G	489	907	1396	0.217959	0	0	525	854	1379	0.04281	0	0.0410811	489	843	1332	0.336768	0	0	0.0136937	0.0193658		1260	1964	3224	0.426732	0	0	918	2360	3278	0.351567	0	0	1944	1468	3412	0.364411	0	0	0	0
18S	276	G	218	613	831	0.568616	0	0.362773	288	629	917	0.804745	0.0631861	0.446174	185	449	634	0.636325	0	0.389249	0.399399	0.0347964		511	443	954	1.15691	0.122681	0.536633	447	1740	2187	0.090453	0	0.0829847	917	699	1616	0.540995	0	0.35121	0.323609	0.186227
18S	277	C	562	383	945	0.528823	0	0.346141	391	1003	1394	0.266738	0	0.21069	249	249	498	1.31116	0.162578	0.567808	0.37488	0.147202		806	177	983	1.01012	0.0979576	0.502771	642	1336	1978	0.266032	0	0.210215	1721	683	2404	0.0488519	0	0.046595	0.253193	0.188696
18S	278	G	493	265	758	1.08	0.172793	0.519561	503	587	1090	0.77293	0.133222	0.436187	277	184	461	1.6651	0.304681	0.625288	0.527012	0.0773795		671	322	993	0.902068	0.0656012	0.474507	648	625	1273	1.10999	0.205606	0.526259	1350	256	1606	0.685328	0.0360128	0.406794	0.469187	0.0489163
18S	279	C	1017	1092	2109	0.287509	0	0	1055	1103	2158	0.10564	0	0	415	612	1027	0.199622	0	0.166539	0.055513	0.0785072		987	763	1750	0.0299448	0	0	1249	1577	2826	0.0801242	0	0	2178	704	2882	0.105415	0	0	0	0
18S	280	C	1503	1363	2866	0.484033	0	0	1950	1465	3415	0.443937	0	0	924	860	1784	0.31756	0	0	0	0		1408	336	1744	0.112264	0	0	2074	2146	4220	0.400732	0	0	3879	847	4726	0.506563	0	0	0	0
18S	281	G	1307	1123	2430	0.370575	0	0	1666	1250	2916	0.287369	0	0	739	1053	1792	0.281558	0	0	0	0		920	595	1515	0.0810393	0	0	1230	679	1909	0.494927	0.0432248	0.331187	1950	574	2524	0.0266227	0	0	0.110396	0.156123
18S	282	G	965	975	1940	0.197149	0	0	1176	1273	2449	0.0856735	0	0	649	772	1421	0.014596	0	0	0	0		665	600	1265	0.0485694	0	0.0463546	1019	2086	3105	0.118899	0	0	1374	687	2061	0.149208	0	0.12989	0.0587483	0.0537468
18S	283	C	1459	599	2058	0.266737	0	0	1834	600	2434	0.0650194	0	0	1133	807	1940	0.291116	0	0	0	0		750	512	1262	0.0701328	0	0.0655851	1784	880	2664	0.0462664	0	0.0442364	2778	277	3055	0.281726	0	0	0.0366072	0.0273131
18S	284	G	814	163	977	0.586117	0.0340351	0.369768	1179	443	1622	0.43156	0	0.301591	914	243	1157	0.269363	0	0.212348	0.294569	0.064458		468	308	776	0.825769	0.224142	0.452605	1460	885	2345	0.186938	0	0.157552	1713	187	1900	0.164545	0	0.141359	0.250505	0.143058
18S	285	G	641	226	867	0.692358	0.0756257	0.409387	1179	420	1599	0.423882	0	0.297825	916	252	1168	0.255099	0	0.203389	0.303534	0.0841952		790	558	1348	0.00236389	0	0.00236006	2037	644	2681	0.013369	0	0.0131974	899	230	1129	0.933766	0.168143	0.483095	0.166218	0.22411
18S	286	C	1019	260	1279	0.0206597	0	0	2288	442	2730	0.257626	0	0	1759	158	1917	0.29905	0	0	0	0		1019	393	1412	0.0764174	0	0	3335	604	3939	0.378161	0	0	1786	161	1947	0.0213723	0	0	0	0
18S	287	U	1034	137	1171	0.0850019	0	0	2809	312	3121	0.431465	0	0	1943	161	2104	0.418364	0	0	0	0		1106	356	1462	0.161358	0	0	3482	423	3905	0.434067	0	0	1621	97	1718	0.0378321	0	0	0	0
18S	288	U	957	198	1155	0.21583	0	0	2358	485	2843	0.439237	0	0	1610	239	1849	0.389634	0	0	0	0		1079	496	1575	0.264552	0	0	2762	163	2925	0.261669	0	0	1489	108	1597	0.0586288	0	0	0	0
18S	289	U	727	198	925	0.137761	0	0	830	527	1357	0.151064	0	0.131322	444	246	690	0.659463	0.114182	0.397742	0.176355	0.16547		807	657	1464	0.235791	0	0	1094	422	1516	0.402798	0.0344939	0.287274	1502	129	1631	0.166619	0	0	0.095758	0.135422
18S	290	G	322	148	470	0.543619	0.130301	0.352657	415	272	687	1.06699	0.16851	0.516568	222	153	375	1.76711	0.309213	0.639227	0.502817	0.117395		655	564	1219	0.0963024	0	0	706	240	946	1.15262	0.21	0.535713	1245	342	1587	0.26109	0	0	0.178571	0.252538
18S	291	G	289	49	338	1.01298	0.213293	0.503962	621	136	757	0.66221	0.0226618	0.398708	543	97	640	0.444531	0	0.308067	0.403579	0.0800483		599	423	1022	0.0607147	0	0.0572922	658	385	1043	0.831716	0.091803	0.454301	519	383	902	0.244026	0.0148398	0.196333	0.235976	0.164484
18S	292	U	182	116	298	1.14441	0.213987	0.534504	422	298	720	0.57203	0	0.364201	562	240	802	0.0400028	0	0.0385102	0.312405	0.205774		549	444	993	0.0317237	0	0.0307782	807	496	1303	0.382941	0	0.277057	348	518	866	0.219082	0	0.179881	0.162572	0.101285
18S	293	G	263	143	406	0.390827	0	0.281501	419	165	584	0.652536	0	0.395278	464	157	621	0.212808	0	0.1757	0.28416	0.0896621		262	155	417	1.53915	0.349917	0.60674	602	233	835	1.07578	0.136683	0.518553	306	236	542	0.871803	0.158405	0.466214	0.530502	0.0579882
18S	294	A	157	192	349	0.478127	0	0.324095	321	142	463	0.706466	0	0.414517	326	138	464	0.409725	0	0.291086	0.343232	0.052176		222	487	709	0.403912	0.0250318	0.287994	487	377	864	0.858292	0.128003	0.462159	253	248	501	0.903143	0.138114	0.475051	0.408401	0.0853034
18S	295	C	271	162	433	0.062596	0	0.0590366	207	359	566	0.122771	0	0.109518	277	218	495	0.148454	0	0.129492	0.0993489	0.0296485		256	456	712	0.400343	0.0232458	0.286176	1197	617	1814	0.204659	0	0	274	329	603	0.506935	0.00781162	0.336771	0.207649	0.148276
18S	296	U	292	296	588	0.243633	0	0	96	224	320	1.1964	0.115497	0.545483	214	218	432	0.377803	0	0.274667	0.273384	0.222694		278	731	1009	0.0653135	0	0.0613662	1341	559	1900	0.207002	0	0	309	273	582	0.658109	0	0.397314	0.152894	0.174638
18S	297	C	282	292	574	0.1863	0	0	367	276	643	0.100052	0	0.0910804	334	275	609	0.036357	0	0	0.0303601	0.0429357		346	407	753	0.51786	0	0.341476	1509	408	1917	0.191559	0	0	359	256	615	0.617532	0.0747431	0.382158	0.241211	0.171369
18S	298	U	347	228	575	0.131829	0	0	572	308	880	0.195044	0	0	546	174	720	0.208137	0	0	0	0		459	465	924	0.286907	0	0.22313	1934	486	2420	0.379558	0	0	419	570	989	0.0264646	0	0.0258077	0.0829794	0.0996603
18S	299	A	327	124	451	0.270206	0	0.213098	446	190	636	0.263457	0	0.20878	481	208	689	0.165668	0	0	0.140626	0.0994532		578	854	1432	0.133899	0	0	1651	412	2063	0.251109	0	0	455	943	1398	0.244913	0	0	0	0
18S	300	G	143	150	293	1.28401	0.224059	0.563013	210	184	394	1.40231	0.189921	0.584349	179	114	293	1.21961	0.227037	0.550315	0.565892	0.014043		219	953	1172	0.171043	0	0.146167	655	529	1184	0.429189	0.00575652	0.30048	211	806	1017	0.212224	0	0.175212	0.207286	0.0669562
18S	301	A	156	147	303	1.62091	0.292704	0.61923	323	179	502	1.08142	0.179072	0.520056	264	178	442	0.537146	0.0528346	0.349958	0.496414	0.111194		339	1237	1576	0.0959628	0	0	708	399	1107	0.58569	0.101228	0.36957	269	904	1173	0.171569	0	0.14655	0.17204	0.151949
18S	302	U	389	497	886	0.0197169	0	0	817	1311	2128	0.541788	0	0	517	562	1079	0.404547	0	0	0	0		581	2573	3154	0.582856	0	0	1119	980	2099	0.218249	0	0	371	2076	2447	0.417847	0	0	0	0
18S	303	A	223	485	708	0.52241	0.00396796	0.343465	272	832	1104	0.174218	0	0.148484	194	337	531	0.491437	0	0.329921	0.273957	0.0888948		250	809	1059	0.555881	0	0.357494	497	656	1153	0.603254	0.0580107	0.376472	199	1267	1466	0.219087	0	0.179814	0.304593	0.0885717
18S	304	A	253	553	806	0.543605	0.0643821	0.352449	263	559	822	0.76988	0.0339085	0.435289	244	270	514	0.692859	0.0774714	0.409753	0.399164	0.0346384		367	913	1280	0.385463	0	0.278376	488	510	998	0.924135	0.168004	0.480536	189	936	1125	0.841228	0.120833	0.457105	0.405339	0.0902843
18S	305	C	477	777	1254	0.0443913	0	0.0425369	420	1059	1479	0.015961	0	0	329	449	778	0.1364	0	0.120164	0.0542336	0.049749		525	1469	1994	0.113122	0	0	786	746	1532	0.219243	0	0.179915	293	1237	1530	0.415683	0	0.293763	0.157893	0.120935
18S	306	C	952	603	1555	0.110633	0	0	859	1202	2061	0.273068	0	0	570	518	1088	0.190348	0	0	0	0		599	692	1291	0.412298	0	0.292094	986	1158	2144	0.132624	0	0	419	1669	2088	0.0696984	0	0.0651862	0.119093	0.125191
18S	307	U	916	1190	2106	0.288335	0	0	666	868	1534	0.166942	0	0.143139	514	550	1064	0.0422014	0	0	0.047713	0.0674764		436	1228	1664	0.128902	0	0.114244	929	1359	2288	0.084627	0	0	433	2031	2464	0.0496552	0	0	0.0380815	0.0538554
18S	308	C	342	1777	2119	0.242248	0	0	338	1369	1707	0.124779	0	0.110994	214	627	841	0.346727	0	0.257686	0.122894	0.105536		376	1120	1496	0.294782	0	0.227787	388	1609	1997	0.1329	0	0.117361	245	2986	3231	0.270878	0	0	0.115049	0.0930079
18S	309	G	1787	1094	2881	0.467075	0	0	2191	967	3158	0.426348	0	0	1270	466	1736	0.375968	0	0	0	0		1803	639	2442	0.285055	0	0	2377	1330	3707	0.416667	0	0	900	3210	4110	0.450847	0	0	0	0
18S	310	G	1298	984	2282	0.293011	0	0	961	902	1863	0.0963042	0	0.0878875	957	572	1529	0.211721	0	0	0.0292958	0.0414305		2029	1300	3329	0.494054	0	0	926	1419	2345	0.0388984	0	0.0374573	474	3306	3780	0.39625	0	0	0.0124858	0.0176575
18S	311	G	629	352	981	0.782824	0.0835001	0.439343	557	521	1078	1.06906	0.177036	0.516919	530	315	845	0.636919	0.0550187	0.389377	0.448547	0.0524739		1638	250	1888	0.0247632	0	0	480	1077	1557	0.673271	0.0478076	0.402522	359	1501	1860	0.327876	0	0.247018	0.216513	0.165739
18S	312	C	186	709	895	0.880878	0.0855297	0.468611	232	1456	1688	0.28208	0	0.220119	129	485	614	1.36298	0.259528	0.577203	0.421978	0.149462		220	287	507	2.87458	0.429316	0.742285	165	1897	2062	0.229666	0	0.186844	618	1462	2080	0.124267	0	0.110579	0.346569	0.28154
18S	313	C	1382	1054	2436	0.421379	0	0	1711	2199	3910	0.515168	0	0	1221	1070	2291	0.428936	0	0	0	0		2427	360	2787	0.38472	0	0	1500	3242	4742	0.535882	0	0	811	1438	2249	0.0217679	0	0	0	0
18S	314	G	718	683	1401	0.0161436	0	0	981	1384	2365	0.13732	0	0	564	877	1441	0.0227693	0	0	0	0		1614	247	1861	0.0500358	0	0	1191	1065	2256	0.0626348	0	0.0589675	502	1371	1873	0.101743	0	0.0923922	0.0504532	0.0381964
18S	315	A	361	466	827	0.576516	0	0.36597	676	1612	2288	0.131008	0	0	337	1083	1420	0.00935179	0	0.00927161	0.125081	0.170377		744	235	979	0.869615	0.134777	0.465384	943	1797	2740	0.14483	0	0	237	1553	1790	0.0514548	0	0.0489628	0.171449	0.208803
18S	316	U	338	839	1177	0.0812488	0	0	627	1306	1933	0.0459841	0	0	293	1557	1850	0.290258	0	0	0	0		861	800	1661	0.0179503	0	0	1080	1406	2486	0.110052	0	0	247	1130	1377	0.212635	0	0.175455	0.0584849	0.0827101
18S	317	C	429	871	1300	0.286318	0	0	790	1415	2205	0.236386	0	0	412	1530	1942	0.370595	0	0	0	0		738	712	1450	0.0359446	0	0.0347205	567	1386	1953	0.137592	0	0.121005	472	1015	1487	0.0246416	0	0	0.0519085	0.0508732
18S	318	G	248	416	664	0.396207	0	0.28408	376	640	1016	0.687971	0.059217	0.40781	266	744	1010	0.250093	0	0.200218	0.297369	0.0852685		542	1256	1798	0.238305	0	0	351	589	940	1.44345	0.245734	0.591	305	676	981	0.414076	0.0352384	0.293035	0.294678	0.241278
18S	319	C	207	477	684	0.247315	0	0.198511	466	1099	1565	0.037555	0	0	299	1215	1514	0.253091	0	0	0.0661702	0.0935788		571	1342	1913	0.315529	0	0	488	1281	1769	0.184859	0	0.156092	365	1154	1519	0.219715	0	0	0.0520307	0.0735825
18S	320	A	96	288	384	0.953131	0.204828	0.488651	237	913	1150	0.139811	0	0.122755	126	609	735	0.434722	0	0.303288	0.304898	0.149381		321	825	1146	0.0638768	0	0.0600908	268	951	1219	0.596293	0.00664846	0.373741	146	693	839	0.33623	0	0.25185	0.228561	0.129102
18S	321	C	124	568	692	0.0603014	0	0	178	1205	1383	0.176525	0	0	120	1124	1244	0.293815	0	0	0	0		227	1243	1470	0.285951	0	0	171	3025	3196	0.488587	0	0	176	1197	1373	0.309567	0	0	0	0
18S	322	G	82	338	420	0.608577	0.0519812	0.378892	120	452	572	1.00275	0.177526	0.501124	59	422	481	0.79509	0.137204	0.443437	0.441151	0.0499272		151	573	724	0.472123	0.0859711	0.32101	86	1537	1623	0.0563492	0	0.0533745	79	515	594	0.631783	0.0872473	0.387573	0.253986	0.144433
18S	323	C	187	312	499	0.258667	0	0.205836	216	430	646	0.622274	0.0309794	0.383947	66	338	404	0.84118	0.0998381	0.457483	0.349089	0.10565		236	543	779	0.212094	0	0.175167	163	2210	2373	0.366161	0	0	144	811	955	0.109042	0	0	0.0583889	0.0825744
18S	324	C	232	288	520	0.143016	0	0.125332	308	344	652	0.516318	0.0226386	0.340852	86	279	365	0.759532	0.0725791	0.432339	0.299507	0.128699		193	352	545	0.64534	0.0634922	0.39266	195	1533	1728	0.13904	0	0	163	374	537	0.568401	0.0279222	0.362838	0.251833	0.178488
18S	325	C	378	149	527	0.117214	0	0.105094	567	108	675	0.442291	0	0.306974	218	166	384	0.535411	0	0.3493	0.253789	0.106554		226	242	468	0.736603	0.0634465	0.424684	330	560	890	0.698765	0.0928123	0.411609	264	141	405	1.00523	0.11948	0.50192	0.446071	0.0398501
18S	326	C	380	154	534	0.0815576	0	0.0755381	632	109	741	0.236164	0	0.191254	211	118	329	0.585825	0	0.370121	0.212304	0.12118		204	185	389	0.881966	0.121673	0.46928	465	595	1060	0.291863	0	0.226089	381	92	473	0.551406	0	0.355908	0.350426	0.099358
18S	327	C	528	106	634	0.0735433	0	0	702	173	875	0.0329148	0	0.0319012	319	113	432	0.131614	0	0.116544	0.0494818	0.0491763		286	144	430	0.671694	0.0543677	0.402363	628	400	1028	0.290627	0	0.225353	529	122	651	0.0808623	0	0.0749191	0.234212	0.133825
18S	328	C	927	123	1050	0.497769	0	0	1532	132	1664	0.516563	0	0	549	121	670	0.362411	0	0	0	0		714	149	863	0.264198	0	0	1024	277	1301	0.13335	0	0	1078	191	1269	0.5372	0	0	0	0
18S	329	G	465	100	565	0.0131724	0	0.0130238	758	102	860	0.0446767	0	0.0428137	316	81	397	0.140899	0	0.123771	0.0598694	0.0467931		460	134	594	0.121251	0	0.108302	613	193	806	0.389274	0	0.28045	390	137	527	0.235753	0	0.19107	0.193274	0.0702966
18S	330	U	523	117	640	0.135725	0	0	1162	159	1321	0.359287	0	0	424	164	588	0.254141	0	0	0	0		839	157	996	0.372863	0	0	845	260	1105	0.0578059	0	0	781	123	904	0.342812	0	0	0	0
18S	331	G	329	99	428	0.309997	0	0.237062	672	88	760	0.171572	0	0.146611	237	252	489	0.0751701	0	0	0.127891	0.097681		557	129	686	0.0458515	0	0	554	136	690	0.528043	0.060962	0.345896	331	143	474	0.363556	0	0.267035	0.20431	0.148013
18S	332	G	276	59	335	0.657573	0.0911738	0.397422	339	103	442	1.01031	0.131894	0.503129	204	110	314	0.505256	0.0826616	0.33637	0.412307	0.0688877		342	183	525	0.274715	0	0.215833	345	233	578	0.926386	0.190241	0.481325	199	133	332	1.00954	0.134909	0.503126	0.400095	0.130596
18S	333	C	578	108	686	0.2235	0	0	790	181	971	0.13666	0	0	283	142	425	0.165649	0	0.142396	0.0474653	0.0671261		751	299	1050	0.407781	0	0	587	867	1454	0.25428	0	0	438	277	715	0.0752017	0	0	0	0
18S	334	G	282	123	405	0.375424	0	0.273441	679	270	949	0.12717	0	0	273	278	551	0.112943	0	0	0.0911471	0.128901		389	232	621	0.0628081	0	0.0591859	483	273	756	0.589036	0.0609898	0.370996	367	139	506	0.381416	0	0.2765	0.235561	0.130546
18S	335	G	196	119	315	0.711181	0.0916115	0.416378	287	208	495	0.654234	0.0484362	0.395973	160	157	317	0.609119	0.0680782	0.379283	0.397212	0.0151693		212	286	498	0.32338	0	0.24473	300	702	1002	0.179683	0	0.152444	194	99	293	1.36081	0.234738	0.577248	0.324807	0.182435
18S	336	C	330	188	518	0.0613359	0	0.0578963	538	284	822	0.0737951	0	0	302	235	537	0.0552045	0	0	0.0192988	0.0272926		395	297	692	0.0193523	0	0	494	1359	1853	0.398622	0	0	540	333	873	0.24911	0	0	0	0
18S	337	G	301	149	450	0.289258	0	0.224747	369	190	559	0.386647	0	0.279195	211	219	430	0.24148	0	0.194874	0.232939	0.0349081		209	132	341	1.03239	0.111089	0.508701	471	564	1035	0.186915	0	0.157608	444	307	751	0.0852689	0	0	0.222103	0.212624
18S	338	A	179	281	460	0.358062	0	0.264078	233	121	354	1.32839	0.247284	0.571209	209	234	443	0.285586	0	0.222534	0.352607	0.155503		152	278	430	0.587084	0	0.370455	309	1268	1577	0.229271	0	0	393	252	645	0.191864	0	0.161188	0.177214	0.151662
18S	339	C	319	728	1047	0.41725	0	0	274	1060	1334	0.419417	0	0	241	773	1014	0.456081	0	0	0	0		149	622	771	0.157369	0	0	474	1533	2007	0.395147	0	0	628	636	1264	0.373474	0	0	0	0
18S	340	G	136	431	567	0.344464	0	0.256545	151	797	948	0.0868165	0	0	95	408	503	0.344533	0	0.256626	0.171057	0.120956		86	368	454	0.526447	0	0.345381	320	835	1155	0.136448	0	0.120156	353	504	857	0.0640119	0	0.0602269	0.175255	0.12276
18S	341	A	72	402	474	0.83724	0.072292	0.456228	65	602	667	0.395326	0	0.283626	45	411	456	0.629711	0.0546283	0.386914	0.375589	0.070918		40	797	837	0.16957	0	0	126	714	840	0.6601	0.119314	0.397912	168	274	442	1.36469	0.248687	0.577662	0.325191	0.241371
18S	342	C	189	863	1052	0.125546	0	0	263	319	582	0.824967	0.108414	0.45247	203	477	680	0.198058	0	0.165519	0.205996	0.186924		122	1415	1537	0.552789	0	0	497	376	873	0.729596	0.0951756	0.422109	543	258	801	0.52872	0	0.34614	0.256083	0.183715
18S	343	C	366	403	769	0.36785	0	0.269181	451	547	998	0.121978	0	0.108814	329	327	656	0.356655	0.0176415	0.263188	0.213728	0.0742257		140	303	443	0.92968	0.0209484	0.482342	884	255	1139	0.334981	0	0.25109	766	125	891	0.521674	0.0092568	0.343082	0.358838	0.0950633
18S	344	C	492	429	921	0.215486	0	0.177442	633	448	1081	0.129729	0	0.114926	564	361	925	0.00385169	0	0	0.0974559	0.0734861		202	332	534	0.68081	0.0117379	0.4055	1153	305	1458	0.101576	0	0.0922675	1350	82	1432	0.00648988	0	0	0.165922	0.173544
18S	345	A	500	451	951	0.269199	0	0.212277	552	827	1379	0.065	0	0	484	443	927	0.0586327	0	0.0554417	0.0892397	0.0898968		173	310	483	1.11878	0.147411	0.528545	1010	525	1535	0.0981192	0	0.0894051	1481	239	1720	0.129841	0	0	0.205983	0.230988
18S	346	U	579	1496	2075	0.443428	0	0	568	973	1541	0.107717	0	0	604	786	1390	0.30238	0	0	0	0		165	793	958	0.125211	0	0.111381	1075	536	1611	0.121368	0	0.108292	1468	156	1624	0.0133812	0	0	0.0732243	0.0517928
18S	347	U	523	1063	1586	0.205874	0	0	512	650	1162	0.280615	0	0.219273	485	813	1298	0.219613	0	0	0.0730909	0.103366		165	1002	1167	0.0108162	0	0	1011	770	1781	0.0463898	0	0.044357	1245	326	1571	0.0686316	0	0.0642621	0.0362064	0.0268605
18S	348	C	644	1041	1685	0.228074	0	0	842	1428	2270	0.356099	0	0	789	802	1591	0.360797	0	0	0	0		283	1290	1573	0.226211	0	0	1661	1507	3168	0.429764	0	0	2325	1329	3654	0.583317	0	0	0	0
18S	349	G	605	887	1492	0.087713	0	0	674	1290	1964	0.192429	0	0	651	539	1190	0.0670305	0	0	0	0		188	981	1169	0.200522	0	0.167148	1460	521	1981	0.0511885	0	0.0487192	1707	501	2208	0.182456	0	0	0.0719558	0.0701883
18S	350	A	393	737	1130	0.202407	0	0.168459	327	1339	1666	0.0517163	0	0	334	534	868	0.272727	0	0.21448	0.127646	0.0921941		88	935	1023	0.432867	0	0.302304	887	1597	2484	0.202432	0	0	1107	567	1674	0.0764113	0	0.0710265	0.124444	0.129066
18S	351	A	396	889	1285	0.0399084	0	0.0384056	213	1145	1358	0.204775	0	0.170073	308	613	921	0.179778	0	0.152523	0.120334	0.0583735		132	2099	2231	0.336609	0	0	810	1350	2160	0.0691449	0	0	939	316	1255	0.435448	0	0.303522	0.101174	0.143081
18S	352	C	511	1154	1665	0.221008	0	0	417	1953	2370	0.345302	0	0	397	797	1194	0.116578	0	0	0	0		254	1760	2014	0.164075	0	0	1464	1650	3114	0.392335	0	0	1039	748	1787	0.0551703	0	0	0	0
18S	353	G	360	498	858	0.573561	0.0696801	0.364769	178	1070	1248	0.366969	0	0.268612	340	335	675	0.637163	0.0561278	0.389539	0.340973	0.0521569		353	1057	1410	0.359894	0	0.264787	616	493	1109	0.919319	0.117826	0.479207	778	294	1072	0.595319	0	0.373384	0.372459	0.0875391
18S	354	U	396	885	1281	0.00730629	0	0.00725892	243	1548	1791	0.0631882	0	0	442	616	1058	0.00122757	0	0.00122723	0.00282871	0.00317244		546	1451	1997	0.0180792	0	0.0177669	540	1191	1731	0.194842	0	0.163148	569	909	1478	0.0926076	0	0.0848108	0.0885753	0.0594114
18S	355	C	985	788	1773	0.312758	0	0	693	1065	1758	0.0599899	0	0	993	665	1658	0.411406	0	0	0	0		1930	1141	3071	0.329315	0	0	1330	1529	2859	0.335571	0	0	1032	1965	2997	0.571529	0	0	0	0
18S	356	U	56	22	78	16.3302	0.853427	0.942986	35	39	74	23.149	0.898989	0.95912	24	20	44	24.0931	0.889895	0.960999	0.954369	0.00808505	1	32	45	77	31.3855	0.921761	0.969506	22	12	34	61.4981	0.957266	0.98445	17	35	52	27.5482	0.899442	0.96561	0.973188	0.00812018	1
18S	357	G	812	439	1251	0.00495208	0	0	890	807	1697	0.0415456	0	0	788	268	1056	0.0414801	0	0	0	0		1780	768	2548	0.0419467	0	0	890	699	1589	0.25239	0	0.201628	635	636	1271	0.0353337	0	0.0341538	0.0785939	0.0881084
18S	358	C	1062	483	1545	0.214841	0	0	1427	853	2280	0.299635	0	0	1001	264	1265	0.199895	0	0	0	0		2278	795	3073	0.170737	0	0	1237	810	2047	0.0179633	0	0	690	822	1512	0.149027	0	0	0	0
18S	359	C	1396	285	1681	0.311587	0	0	1767	485	2252	0.320975	0	0	1240	188	1428	0.323785	0	0	0	0		2934	315	3249	0.205552	0	0	1925	615	2540	0.246696	0	0	947	261	1208	0.0356677	0	0.0344668	0.0114889	0.0162478
18S	360	C	1222	310	1532	0.237704	0	0	1563	484	2047	0.259066	0	0	1108	183	1291	0.251703	0	0	0	0		3343	272	3615	0.284507	0	0	2555	140	2695	0.283473	0	0	1276	90	1366	0.1264	0	0	0	0
18S	361	U	1013	425	1438	0.195954	0	0	1196	604	1800	0.17101	0	0	862	373	1235	0.236165	0	0	0	0		2663	587	3250	0.178766	0	0	2065	702	2767	0.296765	0	0	1107	137	1244	0.061535	0	0	0	0
18S	362	A	539	16	555	1.22732	0.180506	0.551475	584	522	1106	0.395202	0	0.283442	376	23	399	1.49194	0.205143	0.599308	0.478075	0.139005		1444	708	2152	0.295221	0	0.228013	1030	262	1292	0.621844	0	0.383601	542	22	564	1.06081	0.125631	0.515196	0.375603	0.117378
18S	363	U	812	467	1279	0.0320399	0	0	1007	406	1413	0.115983	0	0.103995	644	137	781	0.28923	0	0.224566	0.10952	0.0917619		2397	1133	3530	0.218887	0	0	1778	212	1990	0.0663876	0	0.062284	974	147	1121	0.0734007	0	0.0684383	0.0435741	0.0309138
18S	364	C	780	352	1132	0.127439	0	0.113123	1080	630	1710	0.100799	0	0	863	371	1234	0.206802	0	0	0.0377077	0.0533267		3140	623	3763	0.26754	0	0	1926	1021	2947	0.319987	0	0	911	673	1584	0.262475	0	0	0	0
18S	365	A	574	217	791	0.700814	0.135976	0.412352	517	277	794	1.08751	0.224532	0.521273	357	234	591	0.850563	0.123228	0.460044	0.464556	0.0445812		1192	323	1515	0.980556	0.236881	0.495256	1027	452	1479	0.488273	0.0699902	0.328229	400	340	740	0.808382	0.122288	0.447353	0.423613	0.0702243
18S	366	A	584	315	899	0.476815	0.0605646	0.32311	559	211	770	1.10551	0.214842	0.525378	385	193	578	0.908175	0.156033	0.47637	0.44162	0.0861541		1294	254	1548	0.86917	0.162384	0.465164	1025	268	1293	0.692865	0.136287	0.409472	540	217	757	0.856332	0.161412	0.461631	0.445423	0.0254616
18S	367	C	1088	131	1219	0.0847905	0	0.0782221	1208	103	1311	0.200542	0	0.167149	811	100	911	0.215899	0	0.177724	0.141032	0.0446223		2591	65	2656	0.00472965	0	0	1939	216	2155	0.0373016	0	0	1062	162	1224	0.190676	0	0.160251	0.0534169	0.0755429
18S	368	U	1436	189	1625	0.164863	0	0	1615	152	1767	0.0870978	0	0	923	209	1132	0.0409434	0	0.0393664	0.0131221	0.0185575		2688	235	2923	0.134071	0	0	2083	343	2426	0.123907	0	0	1206	355	1561	0.0739152	0	0.0688688	0.0229563	0.0324651
18S	369	U	1432	461	1893	0.219318	0	0	1565	471	2036	0.155141	0	0	1195	184	1379	0.0688245	0	0	0	0		2770	180	2950	0.176987	0	0	1676	492	2168	0.0920137	0	0.0842962	1319	714	2033	0.0752049	0	0	0.0280987	0.0397376
18S	370	U	1317	396	1713	0.0730714	0	0	1666	476	2142	0.161264	0	0	1303	350	1653	0.173949	0	0	0	0		3554	189	3743	0.425867	0	0	1324	410	1734	0.463522	0.0384885	0.316842	1275	201	1476	0.436049	0	0.303788	0.206877	0.146381
18S	371	C	1597	347	1944	0.133665	0	0	1930	815	2745	0.32539	0	0	1409	553	1962	0.252827	0	0	0	0		3251	141	3392	0.417238	0	0	2382	594	2976	0.149778	0	0	1705	888	2593	0.138371	0	0	0	0
18S	372	G	943	140	1083	0.700994	0.102204	0.412332	901	266	1167	0.824191	0.119563	0.452024	821	329	1150	0.439917	0	0.3057	0.390019	0.0617851		1440	75	1515	0.347398	0	0.257955	1290	707	1997	0.39118	0.0121705	0.281287	972	876	1848	0.380338	0	0.275648	0.27163	0.00993982
18S	373	A	1231	226	1457	0.255175	0	0.203409	1111	543	1654	0.272561	0	0.214285	1040	383	1423	0.178574	0	0.151607	0.189767	0.027346		1087	165	1252	0.520599	0.0408738	0.342544	1460	724	2184	0.311462	0	0.237575	1038	1337	2375	0.112664	0	0.101294	0.227138	0.0987661
18S	374	U	1717	467	2184	0.187526	0	0	2001	621	2622	0.245059	0	0	1434	715	2149	0.243318	0	0	0	0		1494	197	1691	0.0270948	0	0	3089	721	3810	0.282206	0	0	2327	2419	4746	0.478964	0	0	0	0
18S	375	G	1978	673	2651	0.361974	0	0	2273	430	2703	0.293779	0	0	1426	520	1946	0.148034	0	0	0	0		494	137	631	1.46132	0.258468	0.594096	4265	305	4570	0.41617	0	0	2864	786	3650	0.262598	0	0	0.198032	0.28006
18S	376	G	1691	480	2171	0.224089	0	0	1793	300	2093	0.0942163	0	0	1547	408	1955	0.173069	0	0	0	0		735	141	876	0.504371	0	0.335525	2658	488	3146	0.112004	0	0	1463	995	2458	0.127044	0	0.112764	0.149429	0.139409
18S	377	U	2165	538	2703	0.419983	0	0	2708	487	3195	0.476881	0	0	2267	586	2853	0.488675	0	0	0	0		850	236	1086	0.00411939	0	0.00410625	2949	1099	4048	0.337592	0	0	2237	1881	4118	0.38006	0	0	0.00136875	0.00193571
18S	378	A	873	292	1165	0.430646	0.0210582	0.301196	1471	326	1797	0.0520208	0	0	1032	432	1464	0.064672	0	0.0607825	0.120659	0.130048		426	168	594	0.70239	0.121951	0.412998	1613	784	2397	0.164077	0	0.141	1368	1532	2900	0.107813	0	0	0.184666	0.17141
18S	379	G	515	387	902	0.809536	0.155747	0.447646	511	309	820	1.09372	0.225016	0.522685	603	232	835	0.877685	0.174516	0.467727	0.479353	0.0317184		607	100	707	0.369507	0.00538211	0.270089	785	1127	1912	0.407254	0	0.289504	879	781	1660	0.546525	0.0230136	0.353527	0.304373	0.035649
18S	380	U	736	684	1420	0.0691219	0	0.0646956	563	268	831	0.998878	0.1625	0.50002	794	288	1082	0.383205	0.00456037	0.277226	0.280647	0.177737		830	165	995	0.0205266	0	0.0201335	699	1413	2112	0.235405	0	0.190622	884	961	1845	0.30068	0	0.231268	0.147341	0.0914671
18S	381	C	381	626	1007	0.443552	0.0123985	0.307475	493	367	860	0.77099	0.0534931	0.43563	655	521	1176	0.17471	0	0.148834	0.297313	0.117304		667	224	891	0.190159	0	0.159927	660	1572	2232	0.0898044	0	0.0824381	1083	1695	2778	0.273228	0	0	0.0807884	0.0653004
18S	382	G	260	788	1048	0.275183	0	0.21596	509	640	1149	0.234464	0	0.190066	240	599	839	0.602037	0.0279191	0.376074	0.2607	0.082264		517	135	652	0.8951	0.147144	0.472705	563	1022	1585	0.488861	0.0245001	0.328485	537	484	1021	1.00216	0.168763	0.500785	0.433992	0.0754803
18S	383	C	404	1024	1428	0.168649	0	0	466	920	1386	0.0402307	0	0	346	903	1249	0.0340533	0	0	0	0		644	346	990	0.33774	0	0.252661	654	1920	2574	0.160552	0	0	745	1131	1876	0.0424436	0	0	0.0842203	0.119106
18S	384	C	568	844	1412	0.2265	0	0	732	842	1574	0.223633	0	0	493	1187	1680	0.365801	0	0	0	0		988	352	1340	0.138694	0	0.121881	1047	1654	2701	0.269549	0	0	980	981	1961	0.201353	0	0	0.040627	0.0574552
18S	385	G	421	492	913	0.21787	0	0.179055	388	379	767	0.653617	0.0275428	0.395576	304	628	932	0.178135	0	0.151339	0.24199	0.10919		530	565	1095	0.622435	0.0912841	0.383858	335	214	549	2.86687	0.457314	0.741742	377	214	591	1.63703	0.282188	0.621184	0.582261	0.148675
18S	386	U	309	1131	1440	0.275588	0	0	289	1716	2005	0.414152	0	0	295	1229	1524	0.329086	0	0	0	0		521	2132	2653	0.307967	0	0	485	2295	2780	0.340277	0	0	528	1127	1655	0.165949	0	0	0	0
18S	387	G	212	662	874	0.265994	0	0.210296	192	745	937	0.462367	0	0.316408	166	660	826	0.333521	0	0.250333	0.259012	0.0437523		291	1438	1729	0.269615	0	0.212456	237	1806	2043	0.0448793	0	0	371	913	1284	0.0971639	0	0.088622	0.100359	0.0871311
18S	388	C	195	883	1078	0.0139018	0	0	259	1542	1801	0.270009	0	0	241	762	1003	0.0446547	0	0.0427867	0.0142622	0.0201698		364	2245	2609	0.122967	0	0	415	2155	2570	0.273015	0	0	475	1261	1736	0.247566	0	0	0	0
18S	389	C	179	354	533	1.09255	0.233192	0.522582	197	862	1059	0.353239	0	0.261214	246	329	575	0.903858	0.174483	0.475184	0.41966	0.113697		381	1728	2109	0.192217	0	0.161291	415	1525	1940	0.0141451	0	0	560	343	903	0.549275	0.0104651	0.35479	0.172027	0.145041
18S	390	U	149	952	1101	0.0638435	0	0	254	1143	1397	0.00695438	0	0	255	1023	1278	0.232022	0	0	0	0		494	3644	4138	0.424781	0	0	426	565	991	0.958266	0.103545	0.489596	638	310	948	0.445182	0	0.30827	0.265956	0.202104
18S	391	A	131	555	686	0.551933	0.0717708	0.355976	123	479	602	1.455	0.282168	0.593069	189	370	559	0.816806	0.145107	0.450026	0.466357	0.0974793		329	2496	2825	0.0651333	0	0	221	646	867	1.19012	0.158025	0.54369	347	239	586	1.40151	0.260489	0.58401	0.3759	0.266311
18S	392	C	344	774	1118	0.0544534	0	0	569	1022	1591	0.093244	0	0	558	449	1007	0.00893959	0	0	0	0		827	2340	3167	0.145507	0	0	782	893	1675	0.146135	0	0.127569	892	462	1354	0.0617712	0	0.058218	0.0619289	0.0521458
18S	393	C	645	1051	1696	0.406908	0	0	997	1092	2089	0.353222	0	0	876	535	1411	0.333585	0	0	0	0		1506	2141	3647	0.293488	0	0	1325	1749	3074	0.443205	0	0	1266	893	2159	0.375381	0	0	0	0
18S	394	A	434	415	849	0.326092	0	0.246123	692	912	1604	0.116989	0	0	431	406	837	0.227765	0	0.185692	0.143938	0.104727		1109	1378	2487	0.0807431	0	0.0747385	816	1301	2117	0.132405	0	0	868	1193	2061	0.345253	0	0	0.0249128	0.0352321
18S	395	U	267	776	1043	0.0883993	0	0.0812911	474	1210	1684	0.16784	0	0	331	736	1067	0.0370474	0	0	0.027097	0.038321		798	1240	2038	0.321078	0.0063422	0.243133	565	945	1510	0.253144	0	0.202114	700	391	1091	0.311111	0	0.237454	0.227567	0.0181468
18S	396	G	219	866	1085	0.0958052	0	0.0875026	345	789	1134	0.319139	0	0.242091	346	467	813	0.365643	0.0292141	0.267985	0.199193	0.0796814		628	1047	1675	0.586668	0.0951183	0.369888	538	941	1479	0.323048	0	0.244294	655	783	1438	0.0187476	0	0	0.204727	0.153576
18S	397	G	192	821	1013	0.250296	0	0.200347	350	985	1335	0.130123	0	0.115217	327	493	820	0.395223	0.0565856	0.283516	0.199693	0.0687094		644	2206	2850	0.160014	0	0	537	1173	1710	0.202857	0	0.168728	583	955	1538	0.0394701	0	0	0.0562427	0.0795392
18S	398	U	234	1265	1499	0.0817259	0	0	470	1483	1953	0.203577	0	0	440	1108	1548	0.201621	0	0	0	0		785	2274	3059	0.196231	0	0	451	2159	2610	0.141504	0	0	588	1709	2297	0.335224	0	0	0	0
18S	399	G	204	1220	1424	0.041575	0	0.0399425	215	751	966	0.790026	0.166469	0.441604	305	814	1119	0.213929	0	0.176358	0.219302	0.166766		376	1163	1539	0.648442	0.0351269	0.393521	286	1331	1617	0.533361	0.0223463	0.347978	389	671	1060	0.6756	0.0436916	0.403426	0.381642	0.0241448
18S	400	A	97	946	1043	0.528161	0.0580439	0.345835	175	846	1021	0.737454	0.176559	0.424684	193	878	1071	0.360987	0	0.265421	0.345314	0.0650201		388	1766	2154	0.112209	0	0.100931	244	1966	2210	0.134821	0	0.118851	266	459	725	1.67567	0.288045	0.626584	0.282122	0.243681
18S	401	C	232	1212	1444	0.111949	0	0.100741	284	1472	1756	0.0281604	0	0	484	863	1347	0.104006	0	0.0942711	0.0650041	0.0460406		571	2148	2719	0.17	0	0	452	1695	2147	0.196617	0	0.164375	459	585	1044	0.855183	0.0807489	0.461208	0.208527	0.190858
18S	402	C	162	1228	1390	0.177123	0	0.150563	204	1516	1720	0.00254374	0	0.00253876	457	945	1402	0.0867348	0	0.0798647	0.0776554	0.0604508		356	1196	1552	0.489933	0	0.328971	387	2340	2727	0.0673306	0	0	533	798	1331	0.49195	0	0.329902	0.219625	0.155298
18S	403	A	209	1866	2075	0.243963	0	0	267	1790	2057	0.164874	0	0	373	1207	1580	0.0115398	0	0	0	0		471	1885	2356	0.0860651	0	0	332	2507	2839	0.0979773	0	0	411	2088	2499	0.238076	0	0	0	0
18S	404	C	189	3125	3314	0.574275	0	0	201	2588	2789	0.417841	0	0	402	2978	3380	0.591327	0	0	0	0		371	4576	4947	0.647076	0	0	452	5180	5632	0.60431	0	0	602	2680	3282	0.431445	0	0	0	0
18S	405	G	152	2023	2175	0.304708	0	0	212	2251	2463	0.337369	0	0	255	1340	1595	0.00779031	0	0	0	0		383	961	1344	0.541966	0	0.351647	374	2492	2866	0.138174	0	0	262	3002	3264	0.423546	0	0	0.117216	0.165768
18S	406	G	224	1729	1953	0.260651	0	0	298	2091	2389	0.333812	0	0	524	1736	2260	0.352479	0	0	0	0		534	1629	2163	0.116569	0	0	479	2930	3409	0.324992	0	0	489	3366	3855	0.529054	0	0	0	0
18S	407	G	280	607	887	0.651614	0.0323912	0.394801	230	748	978	0.709125	0.132676	0.415153	195	750	945	0.634202	0.0199083	0.388332	0.399429	0.0114283		334	537	871	1.28056	0.128948	0.561793	241	1143	1384	0.709876	0.0684206	0.415338	341	927	1268	0.639576	0.00230078	0.390274	0.455801	0.0756425
18S	408	U	165	453	618	1.20016	0.130265	0.545889	268	812	1080	0.424751	0.000443225	0.298317	218	738	956	0.53547	0	0.348971	0.397725	0.106789		252	384	636	2.01376	0.255257	0.668537	222	679	901	1.52634	0.261277	0.604435	198	920	1118	0.831606	0.100003	0.454253	0.575742	0.0898033
18S	409	G	193	536	729	0.669802	0	0.401456	214	940	1154	0.223367	0	0.182713	326	882	1208	0.108437	0	0.0979016	0.227357	0.127883		397	483	880	1.11537	0.0895069	0.527553	284	953	1237	0.672267	0.0137615	0.402204	335	730	1065	0.855024	0.11755	0.461157	0.463638	0.0512039
18S	410	A	159	571	730	0.452455	0	0.311804	154	815	969	0.344536	0	0.256446	149	917	1066	0.167427	0	0.143531	0.23726	0.0700241		319	1397	1716	0.00348153	0	0	210	1398	1608	0.156819	0	0.135634	189	1404	1593	0.113683	0	0.102136	0.0792566	0.0576872
18S	411	C	105	1438	1543	0.504375	0	0	144	1500	1644	0.35515	0	0	248	1380	1628	0.39189	0	0	0	0		351	2211	2562	0.418425	0	0	212	1821	2033	0.25053	0	0	280	1813	2093	0.264242	0	0	0	0
18S	412	G	110	593	703	0.0527936	0	0.0502139	175	617	792	0.299622	0	0.230769	241	652	893	0.112105	0	0.100906	0.127296	0.0760368		509	1161	1670	0.0521777	0	0.0496184	294	1044	1338	0.105975	0	0.0958849	363	1037	1400	0.0481561	0	0.0459749	0.0638261	0.0227177
18S	413	G	93	428	521	0.284036	0	0.221536	198	489	687	0.4052	0.0176679	0.288656	146	480	626	0.511519	0.0391826	0.338771	0.282988	0.0480286		491	1554	2045	0.0199794	0	0.0195974	317	857	1174	0.197816	0	0.165264	284	861	1145	0.212662	0	0.175494	0.120119	0.0712019
18S	414	G	198	159	357	0.825605	0.0748505	0.452929	398	401	799	0.210931	0	0.174369	675	276	951	0.0372316	0	0	0.209099	0.186531		1270	437	1707	0.47526	0	0.322281	932	656	1588	0.127467	0	0	768	804	1572	0.123133	0	0	0.107427	0.151925
18S	415	G	271	78	349	0.839968	0.0803985	0.457222	468	268	736	0.34063	0	0.25434	372	125	497	0.944623	0.16154	0.486264	0.399275	0.103168		1264	162	1426	1.05974	0.0941592	0.514676	869	455	1324	0.103514	0	0.0938679	564	636	1200	0.212073	0	0.175088	0.261211	0.182269
18S	416	A	213	129	342	0.847554	0.0922795	0.459469	445	292	737	0.392969	0	0.282384	357	147	504	0.994411	0.153813	0.499094	0.413649	0.0942178		1194	197	1391	1.45548	0.27504	0.592922	754	413	1167	0.328444	0.0255467	0.247399	664	326	990	0.56133	0.096692	0.359753	0.400024	0.143905
18S	417	A	232	189	421	0.462164	0	0.316595	334	286	620	0.737126	0.133361	0.42473	353	259	612	0.676763	0.0861321	0.404006	0.381777	0.0468606		1861	341	2202	0.659137	0.099566	0.397386	658	401	1059	0.510618	0.102473	0.338231	682	231	913	0.732592	0.161705	0.423097	0.386238	0.035532
18S	418	U	292	355	647	0.132579	0	0	527	287	814	0.332556	0.0927954	0.249793	507	332	839	0.228254	0	0.186016	0.14527	0.10597		3152	724	3876	0.0373485	0	0	756	382	1138	0.437099	0.120413	0.30434	737	457	1194	0.321832	0.0662559	0.243628	0.182656	0.131514
18S	419	C	408	383	791	0.265306	0	0	937	517	1454	0.249538	0	0	1095	274	1369	0.21236	0	0	0	0		7354	688	8042	0.560467	0	0	1268	668	1936	0.148483	0	0	1186	995	2181	0.291231	0	0	0	0
18S	420	A	347	266	613	0.0669924	0	0.0628822	1039	454	1493	0.187736	0	0	986	434	1420	0.134451	0	0	0.0209607	0.0296429		5512	580	6092	0.337952	0	0	1426	507	1933	0.0716764	0	0	1108	985	2093	0.191006	0	0	0	0
18S	421	G	309	403	712	0.0536855	0	0	1004	323	1327	0.0248661	0	0	838	279	1117	0.192775	0	0.16174	0.0539134	0.076245		3846	1233	5079	0.165092	0	0	1234	533	1767	0.0575855	0	0.0544791	962	772	1734	0.0201793	0	0.0197913	0.0247568	0.0225164
18S	422	G	530	134	664	0.0600835	0	0.0567586	1397	315	1712	0.246429	0	0	1609	272	1881	0.302728	0	0	0.0189195	0.0267563		5439	871	6310	0.348246	0	0	1906	609	2515	0.267934	0	0	1363	868	2231	0.216154	0	0	0	0
18S	423	G	448	149	597	0.227388	0	0.185514	941	279	1220	0.131604	0	0.116383	1097	151	1248	0.145094	0	0.126798	0.142898	0.0304324		3366	241	3607	0.204986	0	0.170154	1501	418	1919	0.0163657	0	0.0161105	1173	515	1688	0.0854023	0	0.0787255	0.08833	0.0632536
18S	424	U	513	272	785	0.112793	0	0	1045	427	1472	0.101637	0	0	1198	241	1439	0.0361651	0	0	0	0		2980	140	3120	0.323361	0	0.244408	1582	554	2136	0.121728	0	0	1279	580	1859	0.0543907	0	0	0.0814692	0.115215
18S	425	U	704	367	1071	0.391739	0	0	1052	397	1449	0.102199	0	0	1204	818	2022	0.360054	0	0	0	0		2816	552	3368	0.125263	0	0.111348	1611	757	2368	0.233976	0	0	1345	677	2022	0.174235	0	0	0.0371161	0.0524901
18S	426	C	812	329	1141	0.444143	0	0	1585	674	2259	0.495895	0	0	1598	985	2583	0.553986	0	0	0	0		3980	965	4945	0.376688	0	0	1813	1097	2910	0.431303	0	0	1862	1029	2891	0.491728	0	0	0	0
18S	427	G	392	174	566	0.263296	0	0.208711	776	407	1183	0.000957207	0	0	705	434	1139	0.0736062	0	0.0686159	0.0924424	0.0868557		2106	427	2533	0.160431	0	0.138299	1063	488	1551	0.0914376	0	0.0838267	926	453	1379	0.110217	0	0.0993403	0.107155	0.0229144
18S	428	A	383	145	528	0.488469	0	0.328586	740	199	939	0.223995	0	0.183163	552	353	905	0.292249	0	0.226349	0.246032	0.0609785		2062	326	2388	0.0929538	0	0.0850808	1155	432	1587	0.0189547	0	0.0186136	946	386	1332	0.0962991	0	0.0879003	0.0638649	0.0320182
18S	429	U	410	139	549	0.618081	0	0.382414	772	297	1069	0.0130737	0	0.0129169	340	475	815	0.349905	0	0.259442	0.218258	0.153632		1530	461	1991	0.16337	0	0.140489	1061	342	1403	0.109758	0	0.098966	809	328	1137	0.263357	0	0.208603	0.149353	0.0451958
18S	430	U	25	27	52	19.4822	0.855019	0.952054	29	24	53	21.3912	0.881729	0.95613	16	49	65	16.4396	0.837128	0.943479	0.950554	0.00527268	1	44	106	150	14.4865	0.844227	0.935828	35	10	45	35.957	0.929196	0.973514	35	15	50	28.8586	0.907162	0.967144	0.958829	0.0164706	1
18S	431	C	364	148	512	1.11685	0.0623588	0.528086	512	210	722	0.517304	0	0.341248	251	380	631	0.618477	0	0.382509	0.417281	0.0801415		854	837	1691	0.168525	0	0.144293	771	227	998	0.520843	0	0.342696	520	38	558	1.51024	0.183123	0.60206	0.363016	0.187434
18S	432	C	445	408	853	0.252823	0	0.201992	430	370	800	0.297253	0	0.229361	124	519	643	0.421808	0	0.296995	0.242783	0.039929		586	955	1541	0.152853	0	0.132662	664	427	1091	0.282041	0	0.220151	718	620	1338	0.0862335	0	0	0.117604	0.0905048
18S	433	G	791	406	1197	0.0749861	0	0	414	431	845	0.190688	0	0.160309	251	496	747	0.09388	0	0.0859279	0.0820789	0.0655023		684	766	1450	0.0985068	0	0.0897296	725	298	1023	0.324392	0	0.245117	734	478	1212	0.0360447	0	0	0.111616	0.101258
18S	434	G	2035	100	2135	0.48841	0	0	946	236	1182	0.156673	0	0	783	164	947	0.166045	0	0	0	0		1358	406	1764	0.156147	0	0	1507	425	1932	0.321153	0	0	965	681	1646	0.300917	0	0	0	0
18S	435	A	2228	206	2434	0.545225	0	0	1308	262	1570	0.372933	0	0	1229	305	1534	0.522765	0	0	0	0		1401	1025	2426	0.442288	0	0	1738	488	2226	0.408572	0	0	1610	812	2422	0.547219	0	0	0	0
18S	436	G	2304	212	2516	0.571271	0	0	1605	272	1877	0.502733	0	0	1202	154	1356	0.455916	0	0	0	0		1294	506	1800	0.258566	0	0	1957	457	2414	0.47331	0	0	1152	355	1507	0.208459	0	0	0	0
18S	437	A	390	266	656	0.944546	0	0.486122	491	426	917	0.164815	0	0.141627	218	494	712	0.158968	0	0.13733	0.255026	0.163419		331	616	947	0.524461	0.0301364	0.344269	458	558	1016	0.447351	0	0.309293	455	395	850	0.549432	0	0.354871	0.336144	0.0194741
18S	438	G	184	60	244	4.19211	0.452555	0.808035	332	53	385	1.91721	0.311648	0.657791	105	53	158	4.52103	0.598491	0.819808	0.761878	0.0737574	1	163	39	202	6.30438	0.680341	0.863678	144	39	183	7.466	0.681382	0.882447	153	25	178	6.95227	0.71024	0.874864	0.873663	0.00770922	1
18S	439	G	1199	163	1362	0.200831	0	0	1151	233	1384	0.25724	0	0	445	362	807	0.0296617	0	0.0288419	0.00961397	0.0135962		1446	332	1778	0.238979	0	0	1424	124	1548	0.0674198	0	0	1066	167	1233	0.103611	0	0.0939523	0.0313174	0.0442896
18S	440	G	1062	159	1221	0.164384	0	0	910	263	1173	0.113572	0	0	561	179	740	0.15599	0	0.135099	0.0450329	0.0636861		1299	102	1401	0.00589634	0	0.00586594	1610	515	2125	0.336077	0	0	1067	503	1570	0.136983	0	0	0.00195531	0.00276523
18S	441	A	645	177	822	0.158971	0	0.13731	588	452	1040	0.00715124	0	0.00710724	407	453	860	0.0299135	0	0.0290775	0.0578315	0.0569109		1155	251	1406	0.0540314	0	0.0512963	1010	708	1718	0.137813	0	0	1142	556	1698	0.186692	0	0	0.0170988	0.0241813
18S	442	G	145	148	293	2.10903	0.25868	0.679099	169	332	501	1.17776	0.204543	0.541307	218	296	514	0.830334	0.0928349	0.454134	0.55818	0.0926137		315	268	583	1.87447	0.278759	0.652498	295	371	666	1.4242	0.211924	0.587857	458	442	900	0.638537	0.0540577	0.389964	0.54344	0.111686
18S	443	C	349	193	542	0.458113	0	0.31458	350	348	698	0.497981	0.0511571	0.332753	271	375	646	0.478654	0.0374862	0.324048	0.323793	0.00742132		447	675	1122	0.532275	0	0.347577	533	522	1055	0.509291	0.00521728	0.337649	744	560	1304	0.132337	0	0.11695	0.267392	0.106456
18S	444	C	337	231	568	0.407694	0	0.28998	375	600	975	0.0754668	0	0.0702381	367	415	782	0.314715	0.0143973	0.239612	0.199943	0.0939924		461	955	1416	0.336101	0	0.251687	667	524	1191	0.400541	0.000573778	0.286161	805	581	1386	0.118033	0	0.10564	0.214496	0.0782491
18S	445	U	560	337	897	0.11783	0	0	649	798	1447	0.279466	0	0	483	983	1466	0.285632	0	0	0	0		811	2053	2864	0.313613	0	0	1208	947	2155	0.227819	0	0	1549	946	2495	0.397894	0	0	0	0
18S	446	G	434	227	661	0.213729	0	0.176313	489	403	892	0.265174	0	0.20978	474	670	1144	0.0423872	0	0.0406977	0.142264	0.073106		592	1069	1661	0.449733	0	0.310346	874	905	1779	0.0123471	0	0	835	706	1541	0.0726113	0	0.0677368	0.126028	0.133234
18S	447	A	705	271	976	0.213033	0	0	688	692	1380	0.210467	0	0	717	1016	1733	0.314866	0	0	0	0		1003	1982	2985	0.154997	0	0	1139	1358	2497	0.314852	0	0	1065	1018	2083	0.235834	0	0	0	0
18S	448	G	695	436	1131	0.32287	0	0	718	649	1367	0.197506	0	0	618	830	1448	0.139529	0	0	0	0		840	2678	3518	0.208355	0	0	1168	1103	2271	0.224286	0	0	1021	812	1833	0.145686	0	0	0	0
18S	449	A	514	313	827	0.0138486	0	0.0136758	646	562	1208	0.0124345	0	0	593	621	1214	0.0768267	0	0.0714	0.0283586	0.0309428		726	1567	2293	0.389305	0	0.280304	1118	997	2115	0.114766	0	0	857	721	1578	0.00142143	0	0.00142031	0.093908	0.131803
18S	450	A	471	293	764	0.137763	0	0.121222	547	608	1155	0.0830161	0	0.076714	519	989	1508	0.145888	0	0	0.0659786	0.0500674		611	2439	3050	0.0719473	0	0.0671388	766	968	1734	0.118943	0	0.106354	637	901	1538	0.0111472	0	0	0.0578311	0.043915
18S	451	A	381	339	720	0.217245	0.00637821	0.178676	370	604	974	0.28841	0	0.224028	275	889	1164	0.120048	0	0.107263	0.169989	0.0480632		575	2398	2973	0.161825	0	0.139325	681	690	1371	0.450931	0.108975	0.310944	470	691	1161	0.298049	0	0.229766	0.226678	0.0700969
18S	452	C	428	471	899	0.0671728	0	0	356	1135	1491	0.220539	0	0	407	1671	2078	0.456902	0	0	0	0		513	5054	5567	0.402468	0	0	887	940	1827	0.0336433	0	0.0325655	639	1139	1778	0.255187	0	0	0.0108552	0.0153515
18S	453	G	643	341	984	0.167208	0	0	535	597	1132	0.0748455	0	0.069691	375	815	1190	0.0213266	0	0	0.0232303	0.0328526		669	3425	4094	0.119848	0	0	1377	840	2217	0.155896	0	0	642	885	1527	0.132403	0	0	0	0
18S	454	G	451	392	843	0.0541864	0	0	449	410	859	0.402016	0	0.286979	261	567	828	0.310856	0	0.237358	0.174779	0.125237		498	4635	5133	0.324551	0	0	1198	501	1699	0.115046	0	0.10323	415	329	744	0.79126	0.195214	0.442065	0.181765	0.188823
18S	455	C	447	438	885	0.107976	0	0	374	1496	1870	0.414876	0	0	275	679	954	0.0439442	0	0.0421366	0.0140455	0.0198634		654	2548	3202	0.157956	0	0.136446	1045	1268	2313	0.195755	0	0	447	615	1062	0.205049	0	0.170291	0.102246	0.0736071
18S	456	U	442	511	953	0.184568	0	0	403	1180	1583	0.315832	0	0	307	648	955	0.039749	0	0	0	0		670	1763	2433	0.536926	0.0428733	0.349444	1087	527	1614	0.209102	0	0.173029	349	419	768	0.678009	0.123496	0.404369	0.308947	0.09869
18S	457	A	165	431	596	0.420919	0.0417703	0.29658	140	421	561	1.05306	0.146191	0.513368	103	479	582	0.501982	0.023854	0.334595	0.381514	0.0945175		316	2850	3166	0.120258	0	0.107378	454	1128	1582	0.248586	0	0.199195	135	984	1119	0.0852976	0	0.0786585	0.12841	0.0514069
18S	458	C	222	367	589	0.404859	0	0.288533	124	678	802	0.307278	0	0.235276	110	528	638	0.225387	0	0.184166	0.235992	0.0426104		281	4559	4840	0.353405	0	0	603	837	1440	0.342725	0	0.255378	188	912	1100	0.0556867	0	0.0527947	0.102724	0.110073
18S	459	C	202	393	595	0.424925	0	0.29856	198	1045	1243	0.254716	0	0	215	432	647	0.0475652	0	0.0454724	0.114678	0.131343		400	2513	2913	0.0236635	0	0.0231243	901	1615	2516	0.293065	0	0	220	1511	1731	0.414383	0	0	0.00770809	0.0109009
18S	460	A	134	308	442	1.03027	0.191366	0.50802	120	524	644	0.48441	0	0.326673	95	221	316	1.10491	0.216521	0.525708	0.453467	0.0899472		255	2521	2776	0.0366783	0	0	656	1196	1852	0.0437789	0	0	150	947	1097	0.0587533	0	0	0	0
18S	461	C	175	1101	1276	0.316149	0	0	226	1391	1617	0.483223	0	0	235	653	888	0.330309	0	0	0	0		389	3978	4367	0.515939	0	0	1152	1777	2929	0.435047	0	0	281	1578	1859	0.488381	0	0	0	0
18S	462	A	122	760	882	0.124236	0	0.110618	99	485	584	0.555081	0	0.357339	138	396	534	0.162908	0	0.140312	0.202756	0.109977		344	1537	1881	0.154499	0	0.133885	727	1346	2073	0.191669	0	0	148	980	1128	0.0930322	0	0	0.0446283	0.0631139
18S	463	U	116	1310	1426	0.33426	0	0	102	558	660	0.306186	0	0.234684	98	540	638	0.0687185	0	0	0.078228	0.110631		230	1650	1880	0.030179	0	0.02931	746	1076	1822	0.0801304	0	0	168	596	764	0.40366	0	0.287845	0.105718	0.129338
18S	464	C	3	342	345	2.0947	0.197313	0.6775	5	15	20	42.3265	0.92023	0.977994	3	202	205	1.9973	0.290348	0.667448	0.774314	0.144082	1	1	124	125	13.447	0.78664	0.931293	9	24	33	50.8899	0.941887	0.981285	5	20	25	40.9081	0.926255	0.977035	0.963204	0.0226312	1
18S	465	C	93	1163	1256	0.200796	0	0	86	576	662	0.27399	0	0.21532	103	503	606	0.0388248	0	0	0.0717732	0.101503		150	313	463	2.16331	0.158024	0.684342	592	731	1323	0.194956	0	0.163253	161	284	445	1.30655	0.100598	0.567004	0.471533	0.223188
18S	466	A	16	1301	1317	0.214829	0	0	20	886	906	0.0982727	0	0	17	520	537	0.112102	0	0.100971	0.033657	0.0475982		12	279	291	3.56564	0.239083	0.781559	79	769	848	0.821987	0	0.45144	24	695	719	0.381543	0	0.27645	0.50315	0.209427
18S	467	A	16	1703	1719	0.415691	0	0	20	1247	1267	0.370505	0	0	27	902	929	0.390418	0	0	0	0		29	575	604	0.932268	0	0.482887	95	2333	2428	0.457797	0	0	30	1304	1334	0.274074	0	0	0.160962	0.227635
18S	468	G	148	1521	1669	0.41159	0	0	122	1270	1392	0.444413	0	0	107	666	773	0.236994	0	0	0	0		137	1697	1834	0.540727	0	0	456	1036	1492	0.101689	0	0	165	1243	1408	0.304243	0	0	0	0
18S	469	G	138	573	711	0.4826	0	0.325818	145	880	1025	0.187286	0	0	128	552	680	0.114048	0	0	0.108606	0.153592		167	983	1150	0.240284	0	0	362	1597	1959	0.360737	0	0	147	1385	1532	0.3148	0	0	0	0
18S	470	A	18	12	30	33.9097	0.919357	0.972253	12	33	45	19.4529	0.847381	0.952119	3	15	18	34.4146	0.919823	0.973209	0.965861	0.00972446	1	5	24	29	31.5615	0.894626	0.970282	12	116	128	9.92016	0.722449	0.909072	6	215	221	4.5516	0.498259	0.820538	0.899964	0.0614713	1
18S	471	A	211	844	1055	0.0667403	0	0	200	735	935	0.061764	0	0	136	709	845	0.269083	0	0	0	0		179	973	1152	0.206341	0	0	254	1355	1609	0.174175	0	0	225	892	1117	0.10484	0	0.0949684	0.0316561	0.0447686
18S	472	G	280	819	1099	0.145606	0	0	246	775	1021	0.142466	0	0	163	481	644	0.00938846	0	0.00931544	0.00310515	0.00439134		178	1220	1398	0.320959	0	0	231	919	1150	0.251694	0	0.201222	343	1176	1519	0.144532	0	0	0.0670742	0.0948572
18S	473	G	103	730	833	0.123554	0	0.110085	146	691	837	0.0510077	0	0.0485873	106	411	517	0.309953	0	0.236963	0.131878	0.0784328		55	1023	1078	0.0151993	0	0	116	1127	1243	0.211379	0	0.17461	147	1404	1551	0.119538	0	0	0.0582035	0.0823121
18S	474	C	247	826	1073	0.220484	0	0	291	933	1224	0.3479	0	0	260	705	965	0.361859	0	0	0	0		151	770	921	0.211906	0	0.17501	284	1210	1494	0.0359569	0	0	309	1328	1637	0.168898	0	0	0.0583368	0.0825007
18S	475	A	149	525	674	0.264626	0	0.209497	219	600	819	0.00627371	0	0.00624216	155	408	563	0.230063	0	0.187304	0.134348	0.0910363		159	681	840	0.367803	0	0.269134	261	1324	1585	0.0774065	0	0	234	1852	2086	0.382383	0	0	0.0897115	0.126871
18S	476	G	88	769	857	0.0356773	0	0	101	407	508	0.636062	0.0152414	0.389244	104	365	469	0.535154	0	0.349083	0.246109	0.174796		111	956	1067	0.0873908	0	0.0804367	247	525	772	0.995903	0.113922	0.499297	200	423	623	1.27815	0.136954	0.561443	0.380392	0.213613
18S	477	C	117	965	1082	0.215215	0	0	102	739	841	0.027593	0	0.0268832	157	794	951	0.205894	0	0	0.00896106	0.0126728		152	915	1067	0.20644	0.00436756	0.171248	333	1599	1932	0.210898	0	0	228	1243	1471	0.0732714	0	0	0.0570826	0.080727
18S	478	A	209	498	707	0.20871	0	0.172874	260	623	883	0.05137	0	0	217	470	687	0.160336	0	0.138354	0.103743	0.0746985		264	1106	1370	0.0633277	0	0	594	1777	2371	0.381703	0	0	391	1599	1990	0.364496	0	0	0	0
18S	479	G	204	689	893	0.089473	0	0	197	497	694	0.246027	0	0.197678	253	447	700	0.226407	0	0.184825	0.127501	0.0903092		271	1308	1579	0.148502	0	0	562	1557	2119	0.258994	0	0	280	1255	1535	0.170052	0	0	0	0
18S	480	G	181	291	472	0.716937	0.0429872	0.418082	207	494	701	0.174122	0	0.14848	295	330	625	0.379783	0	0.275568	0.28071	0.110125		410	794	1204	0.135473	0	0.119397	311	948	1259	0.271808	0	0.213851	274	758	1032	0.176573	0	0.150198	0.161148	0.0393306
18S	481	C	453	657	1110	0.375558	0	0	492	611	1103	0.334924	0	0	696	519	1215	0.345842	0	0	0	0		925	1044	1969	0.319504	0	0	271	1326	1597	0.0389097	0	0	579	282	861	0.330201	0	0.248451	0.0828169	0.117121
18S	482	G	279	291	570	0.280366	0	0.219273	357	151	508	0.548396	0	0.35462	500	254	754	0.150508	0	0.130969	0.234954	0.0919759		860	420	1280	0.169486	0	0.14502	873	162	1035	0.504944	0	0.335739	630	194	824	0.269818	0	0.212689	0.231149	0.0789473
18S	483	C	596	486	1082	0.414712	0	0	724	761	1485	0.554703	0	0	1129	384	1513	0.474747	0	0	0	0		1341	574	1915	0.205196	0	0	1487	386	1873	0.212748	0	0	1049	168	1217	0.200921	0	0	0	0
18S	484	G	248	244	492	0.30737	0	0.235471	282	241	523	0.422477	0	0.2974	512	237	749	0.161096	0	0.138905	0.223925	0.0652184		700	452	1152	0.492734	0	0.33028	543	559	1102	0.393855	0	0.282749	396	369	765	0.239295	0	0.193293	0.268774	0.056791
18S	485	C	441	437	878	0.379914	0	0	633	485	1118	0.448635	0	0	1113	384	1497	0.498472	0	0	0	0		1642	766	2408	0.339661	0	0	846	1710	2556	0.503081	0	0	658	656	1314	0.415547	0	0	0	0
18S	486	A	5	4	9	57.4267	0.948895	0.98457	6	1	7	86.7556	0.966042	0.990015	19	2	21	39.2551	0.929207	0.976261	0.983615	0.00565553	1	38	10	48	37.4635	0.928966	0.974518	14	75	89	15.5847	0.840402	0.940333	8	33	41	18.9188	0.877277	0.950933	0.955262	0.0142877	1
18S	487	A	297	158	455	0.110307	0	0.0995448	301	128	429	0.467364	0	0.319012	547	136	683	0.13577	0	0.119694	0.179417	0.0990506		1168	609	1777	0.0229659	0	0	426	969	1395	0.0488141	0	0	465	301	766	0.0697668	0	0	0	0
18S	488	A	275	210	485	0.0693644	0	0	512	100	612	0.048269	0	0	619	133	752	0.0451085	0	0	0	0		1520	575	2095	0.172344	0	0	400	768	1168	0.127165	0	0.112904	487	252	739	0.0525826	0	0	0.0376346	0.0532234
18S	489	U	307	213	520	0.205033	0	0	390	103	493	0.180814	0	0.15339	589	172	761	0.113955	0	0	0.0511299	0.0723086		1807	917	2724	0.38665	0	0	425	1108	1533	0.190635	0	0	493	231	724	0.0729349	0	0	0	0
18S	490	U	215	160	375	0.0122045	0	0.0120891	511	158	669	0.219635	0	0	646	191	837	0.304163	0	0	0.0040297	0.00569886		2146	634	2780	0.429466	0	0	441	1395	1836	0.385762	0	0	469	198	667	0.0340153	0	0	0	0
18S	491	A	80	65	145	1.64262	0.180937	0.623203	189	29	218	1.59173	0.154517	0.615241	302	80	382	0.541717	0	0.351969	0.530138	0.126026		979	261	1240	0.367526	0	0.268911	164	685	849	0.387229	0	0.279375	216	125	341	0.940253	0.0977874	0.485335	0.34454	0.0996483
18S	492	C	146	64	210	0.625961	0	0.386105	330	53	383	0.358247	0	0.264263	372	82	454	0.0898169	0	0.0825812	0.244316	0.124713		1327	204	1531	0.0181317	0	0	287	911	1198	0.16625	0	0	447	59	506	0.186544	0	0.157478	0.0524927	0.0742358
18S	493	C	357	83	440	0.240237	0	0	692	46	738	0.309968	0	0	428	72	500	0.0309825	0	0	0	0		1475	202	1677	0.14026	0	0	533	688	1221	0.19429	0	0	572	95	667	0.0659182	0	0	0	0
18S	494	C	412	54	466	0.293076	0	0	737	104	841	0.40644	0	0	520	112	632	0.320484	0	0	0	0		1767	165	1932	0.348566	0	0	513	450	963	0.0290111	0	0	692	143	835	0.258014	0	0	0	0
18S	495	A	171	39	210	0.64613	0.0659294	0.393648	370	41	411	0.297033	0	0.229439	252	62	314	0.321023	0	0.243596	0.288894	0.0742969		856	169	1025	0.145289	0	0.126966	278	307	585	0.542548	0.0880042	0.352112	398	92	490	0.339194	0	0.253668	0.244249	0.0921563
18S	496	C	310	47	357	0.123215	0	0	619	149	768	0.387993	0	0	242	50	292	0.256883	0	0.204937	0.0683125	0.0966084		450	67	517	0.956821	0.146365	0.48945	527	213	740	0.0610586	0	0.0576183	684	93	777	0.214796	0	0	0.182356	0.218418
18S	497	U	143	116	259	0.228077	0	0.186302	261	69	330	0.484659	0	0.32711	180	96	276	0.160168	0	0.138487	0.2173	0.0800638		433	101	534	0.506771	0	0.336747	324	125	449	0.58642	0.0886926	0.370168	417	87	504	0.247305	0	0.198587	0.301834	0.0742709
18S	498	C	128	133	261	0.237659	0	0.192617	317	127	444	0.0571286	0	0.0541564	66	80	146	1.15578	0.224698	0.537828	0.261534	0.203383		162	104	266	1.70799	0.225711	0.631596	322	114	436	0.507882	0.00387553	0.33733	379	82	461	0.369937	0	0.270467	0.413131	0.156871
18S	499	C	190	220	410	0.241903	0	0	262	171	433	0.036892	0	0.0356586	187	90	277	0.01251	0	0.0123995	0.0160194	0.0147809		391	109	500	0.14837	0	0.129425	469	116	585	0.023284	0	0	553	247	800	0.281801	0	0	0.0431418	0.0610117
18S	500	C	306	160	466	0.374138	0	0	256	194	450	0.101996	0	0	186	141	327	0.223509	0	0	0	0		388	103	491	0.0525745	0	0	623	140	763	0.367859	0	0	857	168	1025	0.483604	0	0	0	0
18S	501	G	170	100	270	0.148052	0	0.129376	212	178	390	0.0422279	0	0	93	94	187	0.352364	0.0270752	0.261583	0.13032	0.106793		146	149	295	0.284197	0	0.221887	435	132	567	0.190258	0	0	492	95	587	0.0461073	0	0	0.0739623	0.104598
18S	502	A	70	136	206	0.657703	0.0638239	0.397915	93	127	220	0.764907	0.127102	0.434512	59	115	174	0.551619	0.0303342	0.356826	0.396418	0.0317328		82	135	217	0.566157	0.0930833	0.362556	190	188	378	0.251334	0	0.201277	277	109	386	0.567155	0	0.362499	0.308777	0.0760141
18S	503	C	111	137	248	0.394645	0	0.283789	89	209	298	0.21178	0	0.175251	50	145	195	0.454819	0.00911428	0.313729	0.25759	0.0594913		97	109	206	0.528341	0.0380987	0.346792	201	168	369	0.232853	0	0.189288	249	130	379	0.55462	0	0.357361	0.297814	0.0768604
18S	504	C	89	166	255	0.490538	0.0136906	0.329966	54	284	338	0.140675	0	0.123646	74	174	248	0.381035	0	0.27671	0.243441	0.0874534		95	108	203	0.525109	0.0103465	0.345419	75	168	243	1.05264	0.13309	0.513849	209	120	329	0.900808	0.0799694	0.474665	0.444644	0.0719631
18S	505	C	59	278	337	0.0978304	0	0.0893533	47	225	272	0.383272	0	0.277812	55	200	255	0.392882	0	0.282857	0.216674	0.0900531		66	129	195	0.521542	0	0.343925	66	199	265	0.804428	0	0.446738	151	109	260	1.37884	0.0985687	0.580562	0.457075	0.0968829
18S	506	G	72	180	252	0.597628	0	0.375	52	165	217	0.832926	0.0462194	0.455564	64	174	238	0.645886	0	0.393425	0.407996	0.0344664		130	195	325	0.131493	0	0	61	177	238	1.09856	0.0473836	0.524528	201	323	524	0.127048	0	0.112917	0.212482	0.225414
18S	507	G	156	297	453	0.0307146	0	0	86	294	380	0.161505	0	0.139363	76	307	383	0.142303	0	0.12486	0.0880744	0.0625588		155	176	331	0.028012	0	0	144	273	417	0.293567	0	0.227364	349	400	749	0.160311	0	0	0.0757881	0.107181
18S	508	G	398	302	700	0.400586	0	0	278	257	535	0.203856	0	0	177	422	599	0.282019	0	0	0	0		239	143	382	0.178503	0	0	306	447	753	0.3341	0	0	593	581	1174	0.509428	0	0	0	0
18S	509	G	258	191	449	0.130321	0	0.115523	101	385	486	0.0065024	0	0.0064736	106	371	477	0.0640632	0	0.0603248	0.0607737	0.0445202		96	78	174	1.36521	0	0.578602	146	427	573	0.115931	0	0.10405	226	322	548	0.302813	0	0.232756	0.305136	0.200381
18S	510	A	346	429	775	0.280011	0	0	232	626	858	0.386768	0	0	206	1065	1271	0.597519	0	0	0	0		227	279	506	0.0281832	0	0	324	774	1098	0.305389	0	0	547	515	1062	0.29008	0	0	0	0
18S	511	G	29	1	30	22.1011	0.851991	0.95805	6	6	12	50.8462	0.924502	0.982169	14	13	27	24.5123	0.822445	0.96215	0.967456	0.0105374	1	9	7	16	36.0739	0.892537	0.974573	15	6	21	47.2207	0.90941	0.980186	10	22	32	28.1734	0.870637	0.966726	0.973828	0.00552004	1
18S	512	G	529	115	644	0.13733	0	0.120912	400	203	603	0.104323	0	0.0946097	224	356	580	0.220731	0	0.181074	0.132199	0.0361897		376	113	489	0.397302	0	0.284751	773	38	811	0.420936	0	0.296495	489	142	631	0.542915	0	0.352237	0.311161	0.0294383
18S	513	U	1017	240	1257	0.454831	0	0	890	464	1354	0.561304	0	0	454	599	1053	0.369418	0	0	0	0		706	419	1125	0.425913	0	0	1197	342	1539	0.256349	0	0	835	1024	1859	0.548178	0	0	0	0
18S	514	A	30	5	35	23.0401	0.830704	0.959512	19	3	22	32.8778	0.866266	0.971729	10	8	18	42.0918	0.896223	0.977988	0.969743	0.0076727	1	10	9	19	42.6172	0.894342	0.978195	26	8	34	41.2051	0.9081	0.976968	21	5	26	39.221	0.889563	0.976036	0.977066	0.000883949	1
18S	515	G	811	246	1057	0.272695	0	0	745	250	995	0.311502	0	0	465	540	1005	0.276154	0	0	0	0		614	795	1409	0.416044	0	0	1173	943	2116	0.342891	0	0	892	467	1359	0.288546	0	0	0	0
18S	516	U	1093	503	1596	0.533208	0	0	938	514	1452	0.548528	0	0	505	1146	1651	0.591283	0	0	0	0		632	1332	1964	0.544043	0	0	1753	1356	3109	0.535509	0	0	1173	769	1942	0.502825	0	0	0	0
18S	517	G	768	351	1119	0.259722	0	0	397	392	789	0.0670042	0	0	373	559	932	0.213302	0	0	0	0		282	697	979	0.156633	0	0.135541	1439	932	2371	0.301232	0	0	742	760	1502	0.29929	0	0	0.0451803	0.0638946
18S	518	A	1159	233	1392	0.382962	0	0	632	269	901	0.144457	0	0	418	513	931	0.181378	0	0	0	0		738	627	1365	0.0927119	0	0	1499	801	2300	0.18435	0	0	755	400	1155	0.0139466	0	0.0137665	0.00458882	0.00648958
18S	519	C	59	1	60	16.7594	0.822027	0.944564	33	2	35	24.6077	0.879887	0.961993	21	4	25	33.2782	0.913028	0.971917	0.959491	0.0113064	1	34	9	43	34.2611	0.921127	0.972267	119	7	126	17.3534	0.84556	0.94592	66	5	71	18.0397	0.856715	0.94817	0.955452	0.0119252	1
18S	520	G	426	291	717	0.663015	0	0.399017	295	411	706	0.394468	0	0.283168	227	542	769	0.160332	0	0.138332	0.273506	0.106643		201	1146	1347	0.22106	0	0.181149	1575	454	2029	0.236076	0	0.191064	720	267	987	0.383356	0	0.277323	0.216512	0.0431899
18S	521	A	552	119	671	1.03748	0	0.509571	409	276	685	0.647668	0	0.39343	255	508	763	0.290183	0	0.225145	0.376048	0.116765		282	1321	1603	0.12286	0	0.109477	1878	311	2189	0.277387	0	0.21723	1090	314	1404	0.0401028	0	0.038583	0.121763	0.0734478
18S	522	A	692	159	851	0.783425	0	0.43957	484	327	811	0.580309	0	0.367499	329	392	721	0.46285	0	0.316703	0.374591	0.0504105		341	1613	1954	0.0370276	0	0	2116	303	2419	0.249137	0	0.199513	1007	377	1384	0.129049	0	0.114372	0.104628	0.0817418
18S	523	A	896	297	1193	0.339047	0	0.253359	582	379	961	0.463756	0	0.317051	376	410	786	0.464478	0	0.317438	0.295949	0.0301166		523	1638	2161	0.0882979	0	0	2162	384	2546	0.252314	0	0.201542	1116	416	1532	0.0694934	0	0.0650175	0.088853	0.0839875
18S	524	A	1099	244	1343	0.373049	0	0.271841	742	363	1105	0.476773	0.00952742	0.323046	510	285	795	0.623646	0.0507597	0.3844	0.326429	0.046014		627	1646	2273	0.0711326	0	0	3011	476	3487	0.0371305	0	0	1180	387	1567	0.122725	0	0.109372	0.0364574	0.0515586
18S	525	A	1646	420	2066	0.0681449	0	0	1209	434	1643	0.0679981	0	0.063705	845	397	1242	0.0729597	0	0.0680496	0.0439182	0.0311055		1098	1597	2695	0.214	0	0	3441	495	3936	0.12229	0	0	1393	610	2003	0.0858616	0	0	0	0
18S	526	U	4028	351	4379	0.589391	0	0	3168	471	3639	0.529389	0	0	2189	438	2627	0.517013	0	0	0	0		2297	2147	4444	0.554471	0	0	6892	734	7626	0.573265	0	0	2509	727	3236	0.412851	0	0	0	0
18S	527	A	1962	212	2174	0.00839847	0	0	1372	410	1782	0.163619	0	0.14068	1194	147	1341	0.114464	0	0.102777	0.0811523	0.0594331		719	1050	1769	0.269824	0	0.212584	3165	379	3544	0.0654192	0	0.0614186	1269	555	1824	0.172298	0	0.147044	0.140349	0.0618943
18S	528	A	2697	171	2868	0.261438	0	0	2736	214	2950	0.301265	0	0	1548	145	1693	0.119461	0	0	0	0		1175	875	2050	0.0630262	0	0.0593166	4060	333	4393	0.173732	0	0	1822	439	2261	0.0582965	0	0	0.0197722	0.0279621
18S	529	C	1677	257	1934	0.139386	0	0.12239	1837	563	2400	0.103735	0	0	2400	260	2660	0.484747	0	0	0.0407965	0.057695		1166	1226	2392	0.154488	0	0	3079	491	3570	0.0142319	0	0.0140361	2054	394	2448	0.122136	0	0	0.0046787	0.00661668
18S	530	A	3755	156	3911	0.514988	0	0	3030	245	3275	0.386671	0	0	2070	127	2197	0.369958	0	0	0	0		1839	497	2336	0.177022	0	0	4108	383	4491	0.245491	0	0	2035	359	2394	0.0914173	0	0	0	0
18S	531	A	1755	182	1937	0.0299966	0	0.0291376	1611	401	2012	0.0346029	0	0.0334616	919	158	1077	0.337765	0	0.25266	0.105086	0.104365		704	451	1155	0.665215	0.0762666	0.399685	1733	349	2082	0.660804	0.115416	0.397997	1484	473	1957	0.131444	0	0.116226	0.304636	0.133228
18S	532	U	429	349	778	1.48937	0.245395	0.598601	1079	548	1627	0.218871	0	0.179659	367	242	609	1.28304	0.202774	0.562392	0.446884	0.189534		474	498	972	0.83773	0.0853806	0.456105	2325	484	2809	0.11187	0	0.100647	2063	908	2971	0.316932	0	0	0.185584	0.195651
18S	533	A	1549	146	1695	0.0893278	0	0	1861	230	2091	0.190658	0	0	1367	118	1485	0.246531	0	0	0	0		870	293	1163	0.328265	0	0.247298	2486	225	2711	0.00772697	0	0.00767053	990	644	1634	0.251179	0.00705933	0.200852	0.15194	0.103761
18S	534	C	1024	270	1294	0.109738	0	0.0989555	1763	379	2142	0.27911	0	0	775	249	1024	0.0478157	0	0.0456762	0.0482106	0.0404381		961	1094	2055	0.331626	0	0	1818	306	2124	0.238332	0.00403637	0.192535	1063	711	1774	0.101283	0	0.0920155	0.0948503	0.0786278
18S	535	A	559	276	835	0.592371	0	0.372285	793	134	927	0.628041	0.114435	0.38602	437	128	565	0.811464	0.0941239	0.448398	0.402235	0.0331205		656	289	945	0.526509	0.0525377	0.34515	1636	363	1999	0.233833	0	0.189595	1078	922	2000	0.0831084	0	0	0.178248	0.141135
18S	536	G	551	322	873	0.419197	0	0.295614	505	102	607	1.3049	0.243274	0.566546	601	94	695	0.246296	0	0.197851	0.353337	0.155955		1498	139	1637	0.213675	0	0	2139	315	2454	0.0674994	0	0	1502	504	2006	0.139456	0	0	0	0
18S	537	G	677	85	762	0.438314	0.016858	0.305019	801	103	904	0.31709	0	0.240953	508	115	623	0.25146	0	0.201191	0.249054	0.0427731		1147	110	1257	0.00181063	0	0.0018088	1854	273	2127	0.0222536	0	0.0217791	1312	366	1678	0.00532725	0	0	0.00786264	0.00986811
18S	538	A	506	179	685	0.546923	0.0790316	0.353889	463	115	578	0.95331	0.134364	0.48848	527	114	641	0.164538	0	0.14148	0.32795	0.142845		916	136	1052	0.210372	0	0.173945	1576	224	1800	0.207601	0.0419997	0.171991	1052	258	1310	0.252911	0.0342901	0.201982	0.182639	0.0137007
18S	539	C	602	181	783	0.362883	0.0265767	0.266511	561	217	778	0.356497	0	0.263056	356	193	549	0.362222	0.0151202	0.266261	0.265276	0.00157294		926	95	1021	0.235279	0	0.190618	1653	247	1900	0.106798	0	0.0965383	1076	190	1266	0.222161	0.0447617	0.181895	0.15635	0.042443
18S	540	U	544	393	937	0.0994906	0	0.0905758	567	342	909	0.0721368	0	0.0673522	409	221	630	0.0836063	0	0.0772686	0.0783988	0.00951461		903	154	1057	0.153329	0	0.133054	1666	290	1956	0.0363652	0	0.0351065	1027	195	1222	0.250504	0.0542298	0.200454	0.122871	0.0678856
18S	541	C	845	442	1287	0.225647	0	0	846	587	1433	0.403138	0	0	621	255	876	0.265767	0	0	0	0		1258	229	1487	0.255122	0	0	1962	318	2280	0.149169	0	0	1266	70	1336	0.121375	0	0.10831	0.0361032	0.0510576
18S	542	U	715	692	1407	0.280508	0	0	784	315	1099	0.184323	0	0	492	201	693	0.0526257	0	0	0	0		1171	157	1328	0.153624	0	0	1792	308	2100	0.0876461	0	0	1055	252	1307	0.128364	0.00719604	0.113838	0.0379461	0.0536639
18S	543	U	813	591	1404	0.27395	0	0	717	183	900	0.0101369	0	0.0100462	554	216	770	0.181568	0	0	0.00334873	0.00473582		1023	123	1146	0.0558365	0	0	1687	437	2124	0.147833	0	0	1158	332	1490	0.0520829	0	0	0	0
18S	544	U	615	447	1062	0.00678374	0	0.00674433	555	162	717	0.268292	0	0.21177	480	206	686	0.0863011	0	0	0.0728382	0.0982784		806	342	1148	0.0968572	0	0	1320	447	1767	0.0280292	0	0.02728	1058	421	1479	0.0491592	0	0	0.00909332	0.0128599
18S	545	C	467	511	978	0.153206	0	0.13297	524	489	1013	0.121795	0	0	365	236	601	0.0637135	0	0.059991	0.0643204	0.0543711		662	209	871	0.198216	0	0.165584	1040	931	1971	0.0859139	0	0	1003	638	1641	0.129111	0	0	0.0551948	0.0780573
18S	546	G	474	522	996	0.243419	0	0.195924	338	555	893	0.088255	0	0.0811812	321	132	453	0.522198	0.0678716	0.343552	0.206886	0.107393		422	246	668	0.656967	0.102385	0.396846	731	779	1510	0.348739	0	0.258694	710	795	1505	0.0180021	0	0.0176953	0.224412	0.156674
18S	547	A	388	613	1001	0.425682	0	0.29879	247	622	869	0.213665	0	0.176217	301	472	773	0.0638099	0	0	0.158336	0.122634		491	561	1052	0.0662446	0	0.0621843	647	713	1360	0.749229	0.000460077	0.428499	733	895	1628	0.0048155	0	0.00479535	0.16516	0.187677
18S	548	G	351	726	1077	0.440198	0	0.305848	333	547	880	0.286114	0	0.222661	197	217	414	0.913199	0.132806	0.477917	0.335475	0.106293		307	844	1151	0.0171586	0	0	455	1055	1510	0.642569	0	0.391355	639	830	1469	0.139327	0	0.122362	0.171239	0.163466
18S	549	G	340	522	862	0.958388	0.16258	0.489666	187	300	487	1.61398	0.32506	0.617926	183	268	451	0.849435	0.130813	0.459844	0.522479	0.0685807		320	396	716	0.724516	0.1262	0.420467	379	604	983	1.68155	0.200605	0.627319	398	666	1064	0.642347	0.112346	0.391339	0.479708	0.105052
18S	550	C	533	484	1017	0.797391	0.169729	0.443881	291	387	678	1.00332	0.222347	0.501198	215	320	535	0.649192	0.105427	0.394088	0.446389	0.0437632		401	343	744	0.720209	0.13638	0.419002	589	1485	2074	0.341339	0	0.254568	580	793	1373	0.261216	0	0.207234	0.293601	0.0907529
18S	551	C	1099	649	1748	0.161197	0	0.138888	552	518	1070	0.405177	0.0824471	0.288538	542	335	877	0.105239	0	0.0953167	0.174247	0.0827498		792	176	968	0.370554	0.0451549	0.270572	1051	1472	2523	0.243071	0	0.195603	860	1100	1960	0.116658	0	0	0.155392	0.114061
18S	552	C	2287	603	2890	0.211868	0	0	1466	770	2236	0.300825	0	0	928	359	1287	0.134636	0	0	0	0		1889	179	2068	0.332436	0	0	2384	3186	5570	0.440316	0	0	1512	1206	2718	0.353496	0	0	0	0
18S	553	U	3056	999	4055	0.383443	0	0	1704	613	2317	0.23249	0	0	1382	504	1886	0.339204	0	0	0	0		1976	172	2148	0.297797	0	0	3761	3581	7342	0.559605	0	0	2165	904	3069	0.398252	0	0	0	0
18S	554	G	2265	461	2726	0.0687895	0	0.0643841	1748	663	2411	0.160079	0	0	838	202	1040	0.440709	0	0.306101	0.123495	0.13177		1501	58	1559	0.0651282	0	0.0611827	1433	1165	2598	0.566085	0	0.361554	873	276	1149	0.928251	0.0918884	0.481613	0.30145	0.176823
18S	555	U	1945	109	2054	0.555956	0	0.35742	1554	461	2015	0.145089	0	0.126761	961	93	1054	0.587667	0.0264154	0.370366	0.284849	0.11191		1782	32	1814	0.0741904	0	0	1353	239	1592	1.83748	0.301343	0.647717	1207	122	1329	0.767987	0.0850591	0.43457	0.360762	0.269531
18S	556	A	1647	909	2556	0.308652	0	0.235925	1086	584	1670	0.536598	0.0824976	0.349348	662	497	1159	0.580115	0.0907604	0.367335	0.317536	0.0581729		1232	48	1280	0.457663	0	0.314139	1354	3254	4608	0.000200092	0	0.000200095	888	428	1316	0.94846	0.203375	0.486964	0.267101	0.201485
18S	557	A	1383	2889	4272	0.220519	0	0	986	1818	2804	0.0576154	0	0	713	1466	2179	0.150882	0	0	0	0		1281	270	1551	0.275286	0	0.215972	1503	4663	6166	0.217718	0	0	945	1241	2186	0.204171	0	0.169618	0.12853	0.0928335
18S	558	U	1594	3982	5576	0.403066	0	0	1062	1865	2927	0.0149552	0	0	770	2308	3078	0.384894	0	0	0	0		1337	1886	3223	0.368355	0	0	1766	2974	4740	0.134559	0	0.118622	1238	1978	3216	0.138898	0	0	0.0395408	0.0559191
18S	559	U	1134	3897	5031	0.331284	0	0	948	2409	3357	0.126428	0	0	706	2235	2941	0.341597	0	0	0	0		1317	853	2170	0.0280567	0	0.0273032	1827	3061	4888	0.108836	0	0.0981716	1519	1959	3478	0.176044	0	0	0.041825	0.0413729
18S	560	G	849	2564	3413	0.0138482	0	0.013663	1039	2976	4015	0.267297	0	0	527	1736	2263	0.121859	0	0	0.00455433	0.0064408		1315	427	1742	0.370562	0	0.270485	2361	2700	5061	0.0835309	0	0.0771054	1534	2328	3862	0.240682	0	0	0.115864	0.113775
18S	561	G	835	1935	2770	0.251177	0	0.20081	674	2904	3578	0.158055	0	0	529	1750	2279	0.138665	0	0	0.0669368	0.0946629		912	422	1334	0.88506	0.108642	0.4697	1976	4225	6201	0.107727	0	0	1222	2243	3465	0.115067	0	0	0.156567	0.221419
18S	562	A	1057	1761	2818	0.240933	0	0.19421	925	1943	2868	0.0977189	0	0.0890483	449	1632	2081	0.0624186	0	0	0.0944194	0.0793768		1120	1386	2506	0.0151354	0	0	2251	4991	7242	0.230814	0	0	1239	2476	3715	0.170518	0	0	0	0
18S	563	A	1619	1324	2943	0.18442	0	0.15575	1171	1799	2970	0.0603463	0	0.05693	581	1021	1602	0.240369	0	0.193886	0.135522	0.0577125		1491	1327	2818	0.0924087	0	0	2772	4576	7348	0.250005	0	0	1368	1456	2824	0.144692	0	0.126442	0.0421473	0.0596053
18S	564	U	2239	1549	3788	0.105633	0	0	2374	2049	4423	0.321516	0	0	1008	1490	2498	0.24689	0	0	0	0		2021	2980	5001	0.518426	0	0	3739	4109	7848	0.313067	0	0	2044	2883	4927	0.380202	0	0	0	0
18S	565	G	1460	972	2432	0.404941	0.0529446	0.288311	1245	1410	2655	0.181656	0	0.153779	614	494	1108	0.785272	0.142336	0.440084	0.294058	0.116954		845	1626	2471	0.0795847	0	0.0737455	2768	1578	4346	0.328646	0.018089	0.247397	1253	1775	3028	0.0453725	0	0.0434169	0.12152	0.0898655
18S	566	A	2134	905	3039	0.107387	0	0.0970019	1625	1238	2863	0.0841636	0	0.077655	730	508	1238	0.588315	0.0681832	0.37059	0.181749	0.133764		1442	1735	3177	0.181662	0	0	3295	2884	6179	0.101192	0	0	1505	1780	3285	0.0872253	0	0	0	0
18S	567	G	1826	611	2437	0.433397	0.0909749	0.302443	1516	694	2210	0.392427	0.0505053	0.281921	692	320	1012	0.995152	0.195324	0.499032	0.361132	0.0978692		835	1019	1854	0.471027	0.0113617	0.32032	2326	1241	3567	0.591312	0.116158	0.371653	1063	452	1515	0.985525	0.184437	0.49652	0.396164	0.0739917
18S	568	U	3191	762	3953	0.159147	0	0	2143	831	2974	0.0353053	0	0	844	434	1278	0.563617	0.0586625	0.360638	0.120213	0.170006		1145	1087	2232	0.175917	0	0.149657	2284	1297	3581	0.508037	0.038975	0.336949	1117	681	1798	0.548373	0	0.354288	0.280298	0.092648
18S	569	C	2766	920	3686	0.0881717	0	0	1550	652	2202	0.339033	0	0.253278	1235	740	1975	0.00661831	0	0	0.084426	0.119396		885	1686	2571	0.012973	0	0	2660	1396	4056	0.264656	0	0.209312	1199	1391	2590	0.00888117	0	0.00880636	0.0727062	0.0966619
18S	570	C	4244	763	5007	0.365553	0	0	3017	785	3802	0.295506	0	0	2701	563	3264	0.427412	0	0	0	0		1875	1082	2957	0.189133	0	0	4543	1744	6287	0.262576	0	0	1780	2487	4267	0.454012	0	0	0	0
18S	571	A	2698	467	3165	0.0305398	0	0.0296438	2085	317	2402	0.118509	0	0.105992	2138	401	2539	0.249668	0	0	0.045212	0.0446495		1155	1242	2397	0.0594384	0	0	3147	2913	6060	0.277303	0	0	1167	1046	2213	0.0638312	0	0.0600267	0.0200089	0.0282969
18S	572	C	4361	449	4810	0.392912	0	0	2972	1052	4024	0.417005	0	0	2648	469	3117	0.426313	0	0	0	0		1382	1253	2635	0.202837	0	0	3668	2938	6606	0.382019	0	0	1202	1065	2267	0.0351656	0	0	0	0
18S	573	U	2671	671	3342	0.135175	0	0	2112	340	2452	0.0361553	0	0	1866	381	2247	0.18751	0	0	0	0		972	697	1669	0.247818	0	0.198696	2589	744	3333	0.243068	0	0.195586	952	527	1479	0.447988	0	0.309531	0.234604	0.0529963
18S	574	U	1507	239	1746	0.66605	0.134701	0.399915	1217	312	1529	0.527996	0.00245728	0.345696	1316	190	1506	0.214282	0	0.176564	0.307392	0.0951203		789	197	986	1.16787	0.261854	0.53897	1823	762	2585	0.559143	0.0424844	0.358711	664	318	982	1.19218	0.159382	0.544085	0.480589	0.0862058
18S	575	U	1543	724	2267	0.164648	0	0.141425	2273	672	2945	0.315758	0	0	1234	533	1767	0.0384301	0	0	0.0471417	0.0666685		1646	904	2550	0.255791	0	0	2988	1208	4196	0.11379	0	0	1729	1357	3086	0.38791	0	0	0	0
18S	576	A	1240	1086	2326	0.0572793	0	0.0541981	1215	437	1652	0.241608	0	0.194688	935	755	1690	0.0652014	0	0	0.0829619	0.082042		1065	903	1968	0.0449241	0	0	2241	1229	3470	0.045901	0	0.0438986	1081	895	1976	0.0257011	0	0	0.0146329	0.020694
18S	577	A	1069	783	1852	0.221557	0	0.181453	1297	541	1838	0.00549211	0	0	603	356	959	0.531782	0.0695651	0.347402	0.176285	0.141873		1212	593	1805	0.0100529	0	0	2311	771	3082	0.103514	0	0.0938315	927	828	1755	0.00306252	0	0.0030549	0.0322955	0.0435304
18S	578	A	276	608	884	1.58477	0.306573	0.613387	210	274	484	2.90976	0.487949	0.744622	129	147	276	4.18275	0.592291	0.807615	0.721875	0.0809084		476	459	935	0.999917	0.20525	0.500246	991	497	1488	1.30778	0.267061	0.566847	429	535	964	0.863339	0.151895	0.463587	0.510227	0.0427425
18S	579	U	678	727	1405	0.465347	0.0606958	0.317722	619	448	1067	0.529151	0.0224502	0.346254	567	384	951	0.273669	0	0.215044	0.293007	0.0563451		821	863	1684	0.0389383	0	0.0375004	1708	776	2484	0.25345	0	0.202267	757	862	1619	0.0252949	0	0.0246857	0.0881509	0.0808614
18S	580	C	621	1352	1973	0.0325059	0	0	493	878	1371	0.093667	0	0.085702	381	517	898	0.252317	0	0.20166	0.0957872	0.0826354		638	1625	2263	0.253293	0	0	1482	939	2421	0.270474	0	0.212962	650	832	1482	0.119113	0	0.106499	0.106487	0.0869412
18S	581	C	639	1825	2464	0.233676	0	0	580	1123	1703	0.152771	0	0	530	606	1136	0.0532395	0	0	0	0		679	1054	1733	0.0313597	0	0.0304232	1908	1949	3857	0.243243	0	0	753	1480	2233	0.282746	0	0	0.0101411	0.0143416
18S	582	U	637	1805	2442	0.239601	0	0	581	1243	1824	0.272085	0	0	444	920	1364	0.271013	0	0	0	0		691	838	1529	0.131264	0	0.1161	1792	1516	3308	0.134566	0	0	715	946	1661	0.0539377	0	0	0.0386999	0.05473
18S	583	U	560	1190	1750	0.0803922	0	0.0744495	394	1138	1532	0.122258	0	0	409	719	1128	0.123197	0	0	0.0248165	0.0350958		659	722	1381	0.252677	0	0.201826	1773	1475	3248	0.120635	0	0	694	578	1272	0.29327	0	0.226904	0.14291	0.10157
18S	584	U	839	1713	2552	0.30746	0	0	623	1304	1927	0.349769	0	0	627	888	1515	0.373138	0	0	0	0		1090	1324	2414	0.319416	0	0	2501	1960	4461	0.397943	0	0	771	826	1597	0.0216103	0	0.0211662	0.00705539	0.00997783
18S	585	A	466	1366	1832	0.0213978	0	0.0209608	349	517	866	0.622197	0.132877	0.383825	307	570	877	0.183498	0	0.155196	0.186661	0.1498		774	1107	1881	0.0881214	0	0	1599	1087	2686	0.0984907	0	0.0896904	557	758	1315	0.331687	0.0393985	0.249215	0.112968	0.103064
18S	586	A	285	1092	1377	0.31536	0	0.239884	316	476	792	0.69256	0.0734761	0.409484	206	410	616	0.621646	0.0350485	0.383726	0.344365	0.0746234		535	1072	1607	0.019251	0	0.0188989	988	992	1980	0.43934	0	0.305344	390	928	1318	0.279218	0	0.218402	0.180882	0.119913
18S	587	C	205	1904	2109	0.23991	0	0	223	1156	1379	0.0929308	0	0	142	980	1122	0.21305	0	0	0	0		397	1316	1713	0.100441	0	0	881	1548	2429	0.116493	0	0.104377	443	1457	1900	0.13653	0	0	0.0347922	0.0492037
18S	588	G	290	1133	1423	0.168407	0	0.14422	372	724	1096	0.227003	0	0.185144	169	492	661	0.389342	0	0.28054	0.203301	0.0571141		490	548	1038	0.554123	0.00599185	0.356771	929	792	1721	0.579436	0.0121124	0.366998	439	1042	1481	0.1713	0	0.146332	0.290034	0.101698
18S	589	A	432	981	1413	0.247871	0	0.198747	528	929	1457	0.0321216	0	0	305	706	1011	0.0983202	0	0	0.0662491	0.0936904		907	725	1632	0.0160577	0	0	1426	1815	3241	0.168744	0	0	819	1799	2618	0.331997	0	0	0	0
18S	590	G	411	1021	1432	0.275118	0	0.215877	444	701	1145	0.347702	0	0.258163	280	808	1088	0.164524	0	0	0.158014	0.113058		1001	1348	2349	0.334572	0	0	1180	1556	2736	0.0391345	0	0.0376739	1041	981	2022	0.0313341	0	0	0.012558	0.0177597
18S	591	G	247	1528	1775	0.032276	0	0.0312839	319	1119	1438	0.102355	0	0.0929098	206	588	794	0.222376	0	0.182108	0.102101	0.0619159		651	574	1225	0.39072	0	0.281113	751	2604	3355	0.158055	0	0	691	1654	2345	0.172895	0	0	0.0937042	0.132518
18S	592	A	6	21	27	78.1306	0.964505	0.987808	1	130	131	13.3253	0.830828	0.930686	0	8	8	129.685	0.978085	0.993192	0.970562	0.0282824	1	12	7	19	95.1117	0.973954	0.990111	13	16	29	113.777	0.97657	0.991575	13	14	27	81.069	0.965979	0.988245	0.989977	0.00136284	1
18S	593	U	175	498	673	2.56832	0.445995	0.720055	156	1278	1434	0.384646	0.0206175	0.277933	121	178	299	3.27133	0.506525	0.766479	0.588156	0.220178		636	626	1262	0.48486	0.0546058	0.32671	710	1416	2126	0.57958	0.00434273	0.36703	740	998	1738	0.249677	0	0.199885	0.297875	0.0712174
18S	594	C	191	2908	3099	0.237125	0	0	342	2759	3101	0.3499	0	0	226	1096	1322	0.00503065	0	0	0	0		705	1455	2160	0.142167	0	0	929	2472	3401	0.0359854	0	0.0347453	867	1910	2777	0.217811	0	0	0.0115818	0.0163791
18S	595	C	262	4495	4757	0.486675	0	0	402	3166	3568	0.39453	0	0	307	1976	2283	0.38723	0	0	0	0		831	2139	2970	0.368727	0	0	982	5550	6532	0.460398	0	0	1048	2831	3879	0.458966	0	0	0	0
18S	596	A	243	2467	2710	0.0786508	0	0.0729408	363	2222	2585	0.0460815	0	0	244	1007	1251	0.331594	0	0.24917	0.10737	0.104596		863	1381	2244	0.093754	0	0	835	3655	4490	0.133794	0	0	1015	2216	3231	0.33421	0	0	0	0
18S	597	U	165	2560	2725	0.0809693	0	0.0749297	288	1932	2220	0.132783	0	0.117265	175	1692	1867	0.132423	0	0	0.0640649	0.0484858		796	1756	2552	0.251935	0	0	839	3622	4461	0.143349	0	0	931	362	1293	0.747081	0	0.427806	0.142602	0.20167
18S	598	U	73	3903	3976	0.290968	0	0	135	2193	2328	0.0799294	0	0.074043	148	2331	2479	0.352186	0	0	0.024681	0.0349042		324	2485	2809	0.33675	0	0	377	4996	5373	0.317547	0	0	614	1785	2399	0.155593	0	0	0	0
18S	599	G	196	4059	4255	0.331563	0	0	259	3410	3669	0.326119	0	0	218	1969	2187	0.206597	0	0	0	0		758	1536	2294	0.141031	0	0	583	1932	2515	0.631523	0	0.38717	930	922	1852	0.178467	0	0.15151	0.17956	0.159301
18S	600	G	245	3523	3768	0.24341	0	0	457	2969	3426	0.281983	0	0	342	2154	2496	0.305856	0	0	0	0		880	919	1799	0.108309	0	0.0977733	703	4782	5485	0.311842	0	0	1232	1909	3141	0.342259	0	0	0.0325911	0.0460908
18S	601	A	65	3646	3711	0.285288	0	0	184	2719	2903	0.182427	0	0	118	2547	2665	0.365862	0	0	0	0		447	1560	2007	0.0128597	0	0	406	5424	5830	0.363065	0	0	447	1278	1725	0.303232	0	0.23278	0.0775934	0.109734
18S	602	G	269	3437	3706	0.373228	0	0	741	2797	3538	0.410091	0	0	460	1667	2127	0.239171	0	0	0	0		835	1318	2153	0.116785	0	0	1038	2284	3322	0.133032	0	0.117444	1035	934	1969	0.0762267	0	0.0708612	0.0627684	0.0482866
18S	603	G	8	42	50	49.2802	0.954547	0.980494	18	42	60	37.4395	0.93451	0.974401	8	25	33	51.9042	0.95637	0.981644	0.978846	0.00317822	1	13	22	35	61.5052	0.9578	0.984439	13	29	42	94.9121	0.972804	0.989814	25	17	42	53.6059	0.948583	0.982105	0.985453	0.00322762	1
18S	604	G	268	880	1148	0.953592	0.13647	0.48834	373	712	1085	0.947105	0.107261	0.486647	333	563	896	0.781073	0.0810202	0.438815	0.471267	0.0229576		637	346	983	1.30557	0.203451	0.566517	1002	1266	2268	0.720058	0.0790664	0.418731	751	176	927	1.53433	0.27134	0.605675	0.530308	0.0804998
18S	605	C	495	857	1352	0.457157	0	0.313891	702	1734	2436	0.2464	0	0	621	893	1514	0.0788045	0	0	0.10463	0.14797		1455	313	1768	0.269757	0	0.212542	1647	1352	2999	0.264752	0	0.209386	1599	1185	2784	0.218476	0	0	0.140643	0.0994579
18S	606	A	374	906	1280	0.392454	0	0.282001	687	792	1479	0.227778	0	0.185623	567	695	1262	0.0722178	0	0.0674035	0.178342	0.0877604		1283	572	1855	0.333884	0	0.250411	1749	2342	4091	0.0514011	0	0	1382	2053	3435	0.339477	0	0	0.0834703	0.118045
18S	607	A	647	941	1588	0.0031816	0	0	881	773	1654	0.00615643	0	0.00612243	682	1057	1739	0.31175	0	0	0.00204081	0.00288614		1808	1753	3561	0.315007	0	0	1702	3416	5118	0.268983	0	0	1834	2100	3934	0.435476	0	0	0	0
18S	608	G	443	775	1218	0.226816	0	0.185006	662	521	1183	0.395617	0	0.283643	469	417	886	0.356432	0	0.262991	0.24388	0.0424755		1560	966	2526	0.0848129	0	0.0782106	1517	2480	3997	0.0344756	0	0	1283	917	2200	0.13246	0	0.117014	0.0650747	0.0486652
18S	609	U	783	1320	2103	0.404858	0	0	999	600	1599	0.0825833	0	0	692	685	1377	0.223569	0	0	0	0		2179	2242	4421	0.416973	0	0	1835	3598	5433	0.319556	0	0	1733	1172	2905	0.17127	0	0	0	0
18S	610	C	567	976	1543	0.11109	0	0	1163	465	1628	0.0577178	0	0	588	420	1008	0.14723	0	0.128447	0.0428155	0.0605503		2397	1770	4167	0.342109	0	0	1748	3357	5105	0.232452	0	0	1530	767	2297	0.130853	0	0.115756	0.0385854	0.054568
18S	611	U	366	653	1019	0.414031	0.047715	0.293005	891	345	1236	0.308955	0	0.236178	445	281	726	0.673605	0.131096	0.402819	0.310667	0.0691677		1481	845	2326	0.337612	0	0.25248	1367	2204	3571	0.192696	0	0.161602	1220	529	1749	0.597892	0.0934446	0.374309	0.262797	0.0871435
18S	612	G	1010	703	1713	0.227953	0	0	1586	562	2148	0.327796	0	0	1036	398	1434	0.228115	0	0	0	0		2465	2129	4594	0.376206	0	0	2658	2359	5017	0.182065	0	0	2802	970	3772	0.327402	0	0	0	0
18S	613	G	987	275	1262	0.0546846	0	0.0518882	1102	385	1487	0.00978943	0	0	783	208	991	0.141857	0	0.124343	0.0587439	0.0509939		1295	1055	2350	0.316523	0	0.240501	1795	1499	3294	0.290174	0.0121736	0.224963	1807	370	2177	0.207999	0	0.17225	0.212572	0.0292085
18S	614	U	898	460	1358	0.0646799	0	0	1157	674	1831	0.236845	0	0	721	398	1119	0.000505952	0	0.000506148	0.000168716	0.000238601		2131	1018	3149	0.0736825	0	0	2271	1503	3774	0.137628	0	0.121006	2031	358	2389	0.0798233	0	0.0739512	0.0649857	0.0498056
18S	615	G	517	284	801	0.591147	0.0801274	0.371814	482	243	725	1.02949	0.188687	0.50761	539	205	744	0.554422	0.0474777	0.356982	0.412136	0.0677819		962	367	1329	1.29055	0.251131	0.563609	1435	583	2018	1.24315	0.268256	0.55432	1213	397	1610	0.68093	0.119174	0.405241	0.507723	0.0725652
18S	616	C	974	208	1182	0.0381046	0	0	908	500	1408	0.0648372	0	0	928	201	1129	0.0405408	0	0	0	0		1501	366	1867	0.535451	0.0319541	0.348847	2847	687	3534	0.263184	0	0.208396	2126	444	2570	0.0153939	0	0.0151664	0.190803	0.136791
18S	617	C	1304	298	1602	0.34739	0	0	1516	451	1967	0.393716	0	0	1451	218	1669	0.390033	0	0	0	0		3618	521	4139	0.37781	0	0	5373	769	6142	0.274828	0	0	3317	619	3936	0.355821	0	0	0	0
18S	618	A	748	155	903	0.243326	0	0.19588	862	280	1142	0.116623	0	0.104524	927	164	1091	0.00660358	0	0.00656623	0.102324	0.0773027		2204	406	2610	0.0923699	0	0.0845888	3548	533	4081	0.285307	0	0.222018	2131	462	2593	0.111574	0	0.100409	0.135672	0.0613964
18S	619	G	613	248	861	0.243297	0	0.19587	562	160	722	0.696619	0.0707031	0.410927	741	83	824	0.317818	0	0.241392	0.28273	0.0925349		1594	673	2267	0.23252	0	0.188722	3537	484	4021	0.398906	0	0.285206	1642	280	1922	0.527105	0.0495431	0.345284	0.273071	0.0644896
18S	620	C	875	257	1132	0.0785035	0	0	886	466	1352	0.168572	0	0	1529	242	1771	0.449649	0	0	0	0		2564	569	3133	0.109718	0	0	6277	1248	7525	0.227367	0	0	2619	893	3512	0.168729	0	0	0	0
18S	621	A	331	255	586	0.946735	0.178971	0.486745	282	346	628	0.917559	0.118406	0.478901	448	173	621	0.787013	0.120773	0.440804	0.468817	0.0200653		1277	691	1968	0.551289	0.0550002	0.355491	2947	1180	4127	0.644458	0.101503	0.391955	1433	1172	2605	0.253837	0	0.20251	0.316652	0.0820717
18S	622	G	516	224	740	0.597931	0.101996	0.374507	534	131	665	0.846413	0.127463	0.458782	574	104	678	0.626411	0.0896778	0.385498	0.406263	0.0374072		1864	919	2783	0.117429	0	0.105122	5460	834	6294	0.111	0	0.0999242	1814	821	2635	0.297534	0	0.229374	0.144807	0.0598359
18S	623	C	943	174	1117	0.0128603	0	0	853	236	1089	0.0260245	0	0.0253871	744	170	914	0.104627	0	0.0948105	0.0400659	0.0400738		2356	1290	3646	0.189236	0	0	7443	1012	8455	0.199255	0	0	2572	803	3375	0.0294333	0	0	0	0
18S	624	C	1123	275	1398	0.225161	0	0	1380	331	1711	0.396177	0	0	755	387	1142	0.172966	0	0	0	0		2775	1365	4140	0.316252	0	0	9473	1673	11146	0.416911	0	0	3967	1041	5008	0.386067	0	0	0	0
18S	625	G	729	206	935	0.251377	0	0.201052	536	273	809	0.405995	0	0.289013	544	245	789	0.215963	0	0.177792	0.222619	0.0478986		1834	484	2318	0.293747	0	0.227127	7610	366	7976	0.118512	0	0	2068	429	2497	0.352331	0	0.260613	0.16258	0.115771
18S	626	C	1339	181	1520	0.259522	0	0	884	466	1350	0.200049	0	0	860	331	1191	0.244323	0	0	0	0		3029	607	3636	0.235701	0	0	9172	832	10004	0.321333	0	0	3431	1027	4458	0.296459	0	0	0	0
18S	627	G	1821	149	1970	0.446604	0	0	1622	291	1913	0.493562	0	0	1042	379	1421	0.435521	0	0	0	0		4360	355	4715	0.469817	0	0	9257	428	9685	0.319171	0	0	3853	1904	5757	0.507601	0	0	0	0
18S	628	G	1504	97	1601	0.250257	0	0	923	244	1167	0.10118	0	0	712	222	934	0.0835769	0	0	0	0		2871	216	3087	0.15928	0	0	5251	406	5657	0.229533	0	0.18671	2097	1011	3108	0.0383153	0	0	0.0622367	0.088016
18S	629	U	20	0	20	67.6101	0.962991	0.986109	21	3	24	47.0658	0.941925	0.980011	13	3	16	55.8307	0.957666	0.983422	0.983181	0.00249556	1	54	10	64	42.6325	0.943064	0.977426	106	28	134	54.2793	0.958219	0.982042	145	67	212	14.0668	0.834448	0.93392	0.964462	0.021679	1
18S	630	A	1242	204	1446	0.116978	0	0	952	585	1537	0.335869	0	0	752	322	1074	0.220207	0	0	0	0		2223	434	2657	0.108206	0	0	4514	643	5157	0.255355	0	0.203444	2047	976	3023	0.0970679	0	0	0.0678147	0.0959045
18S	631	A	988	136	1124	0.149195	0	0.129926	617	306	923	0.128788	0	0.114203	481	214	695	0.222941	0	0.182513	0.142214	0.0292096		1420	512	1932	0.190251	0	0.159911	6690	583	7273	0.218283	0	0	1849	673	2522	0.000726648	0	0.000726408	0.0535457	0.075212
18S	632	U	719	264	983	0.359993	0	0.2649	402	332	734	0.541557	0	0.351616	444	304	748	0.132191	0	0.116895	0.24447	0.0969072		917	661	1578	0.440307	0	0.305838	4989	668	5657	0.0166392	0	0	1342	666	2008	0.243908	0	0.196161	0.167333	0.126511
18S	633	U	1050	263	1313	0.0250211	0	0.0244285	363	213	576	1.0399	0.105753	0.510213	323	278	601	0.502455	0	0.334793	0.289812	0.200855		818	551	1369	0.622741	0.023761	0.383932	4467	1724	6191	0.18071	0	0	1115	611	1726	0.393753	0	0.28263	0.222187	0.162462
18S	634	C	1713	286	1999	0.353417	0	0	606	345	951	0.227603	0	0.185563	607	331	938	0.0445036	0	0	0.0618543	0.0874752		1473	748	2221	0.0774777	0	0	4490	1993	6483	0.282783	0	0	1278	509	1787	0.257538	0	0.204886	0.0682955	0.0965844
18S	635	C	1528	380	1908	0.287213	0	0	916	626	1542	0.21065	0	0	697	392	1089	0.0990724	0	0	0	0		1790	1006	2796	0.265948	0	0	5343	2314	7657	0.426999	0	0	1837	960	2797	0.152954	0	0	0	0
18S	636	A	840	213	1053	0.455998	0.00989097	0.31339	547	769	1316	0.0432296	0	0.0414684	526	484	1010	0.0801077	0	0.0742344	0.143031	0.121203		924	1125	2049	0.118862	0	0.106281	1790	1176	2966	0.661435	0.154519	0.398191	1464	913	2377	0.129418	0	0.114631	0.206368	0.135683
18S	637	G	431	353	784	1.00954	0.183747	0.502692	322	578	900	0.632347	0.0913582	0.387649	278	331	609	0.942204	0.174013	0.485531	0.458624	0.0506738		556	1642	2198	0.0551412	0	0.0522821	1349	729	2078	1.27543	0.276445	0.560641	719	653	1372	1.11744	0.192879	0.527913	0.380279	0.232313
18S	638	C	903	467	1370	0.155094	0	0.134354	497	1696	2193	0.333369	0	0	477	439	916	0.374676	0.0278903	0.272772	0.135709	0.111363		812	1026	1838	0.41064	0.0134603	0.291214	2576	1018	3594	0.1862	0	0.157009	1238	1066	2304	0.346696	0	0.257525	0.235249	0.0570083
18S	639	U	802	1343	2145	0.286756	0	0	487	1071	1558	0.0436605	0	0.0418597	596	1233	1829	0.336691	0	0	0.0139532	0.0197329		850	1719	2569	0.0458971	0	0.0438993	2117	1146	3263	0.2412	0	0.194376	1412	1623	3035	0.0818731	0	0.0757002	0.104659	0.0647547
18S	640	C	827	1131	1958	0.234258	0	0	598	1290	1888	0.159314	0	0	642	925	1567	0.205548	0	0	0	0		945	1928	2873	0.0581342	0	0	1947	1579	3526	0.0274486	0	0.0267226	1760	1063	2823	0.194082	0	0.162585	0.0631026	0.0711857
18S	641	C	1120	1030	2150	0.3131	0	0	1060	1364	2424	0.355693	0	0	1114	1089	2203	0.454976	0	0	0	0		1807	1704	3511	0.222893	0	0	2912	2167	5079	0.353473	0	0	3110	3722	6832	0.540301	0	0	0	0
18S	642	A	602	530	1132	0.365176	0	0.267667	648	883	1531	0.0596751	0	0.0563492	658	566	1224	0.0768254	0	0.0713985	0.131805	0.0962652		1194	1059	2253	0.26676	0	0.210658	1665	1477	3142	0.0380281	0	0.0366461	2054	1941	3995	0.121138	0	0	0.0824349	0.0918938
18S	643	A	757	637	1394	0.106444	0	0.0962658	432	1042	1474	0.0910584	0	0.0835107	604	604	1208	0.148286	0	0.12923	0.103002	0.019263		1302	1502	2804	0.00941177	0	0.0093273	1529	1204	2733	0.28886	0	0.224184	1752	1618	3370	0.108356	0	0.0977886	0.110433	0.0881696
18S	644	U	916	1186	2102	0.30196	0	0	782	1829	2611	0.450698	0	0	974	971	1945	0.313932	0	0	0	0		1906	3437	5343	0.529495	0	0	2045	2110	4155	0.168963	0	0	3319	2739	6058	0.420709	0	0	0	0
18S	645	A	258	985	1243	0.22241	0	0.182063	189	1307	1496	0.0397981	0	0	258	695	953	0.532867	0.0120602	0.347866	0.176643	0.142067		756	2742	3498	0.245696	0	0	904	1603	2507	0.516148	0	0.340523	1892	2222	4114	0.092364	0	0	0.113508	0.160524
18S	646	G	5	203	208	6.43514	0.679347	0.866061	1	6	7	190.761	0.986978	0.995434	10	46	56	25.6817	0.900922	0.963154	0.94155	0.0549814	1	30	1027	1057	1.6597	0.289138	0.62424	49	6	55	75.8724	0.96683	0.987221	86	45	131	30.2747	0.914178	0.96826	0.859907	0.166821	1
18S	647	C	645	1568	2213	0.440314	0	0	444	1196	1640	0.2385	0	0	590	833	1423	0.0647316	0	0	0	0		942	2255	3197	0.24894	0	0	1734	3138	4872	0.182764	0	0	1919	2572	4491	0.218188	0	0	0	0
18S	648	G	501	647	1148	0.173378	0	0.147869	357	622	979	0.292653	0	0.226576	374	948	1322	0.0311329	0	0.0302151	0.134887	0.0806879		553	1122	1675	0.531815	0	0.347315	1022	2589	3611	0.319161	0	0.241993	1041	1506	2547	0.41559	0	0.293662	0.294323	0.0429999
18S	649	U	787	1030	1817	0.298221	0	0	479	915	1394	0.156591	0	0	639	1869	2508	0.504491	0	0	0	0		951	1414	2365	0.0646332	0	0.0607335	1611	5707	7318	0.332377	0	0	1364	3606	4970	0.338568	0	0	0.0202445	0.02863
18S	650	A	568	698	1266	0.0604315	0	0.0570301	401	447	848	0.431017	0	0.301444	414	1007	1421	0.030622	0	0	0.119491	0.13075		549	1271	1820	0.411203	0	0.291498	807	2904	3711	0.59839	0	0.374433	739	2482	3221	0.0888544	0	0.0816268	0.249186	0.123225
18S	651	U	513	513	1026	0.322861	0	0.244242	349	463	812	0.398647	0	0.285274	465	1018	1483	0.101183	0	0	0.176505	0.125927		687	489	1176	1.20649	0.187122	0.547003	968	5242	6210	0.0305336	0	0.0296336	637	2768	3405	0.00215633	0	0.00215232	0.19293	0.250619
18S	652	A	450	477	927	0.510093	0	0.338031	512	659	1171	0.0634433	0	0	537	549	1086	0.26084	0	0.207029	0.181687	0.139159		659	1482	2141	0.217969	0	0.179029	863	5121	5984	0.185514	0	0.156506	726	2312	3038	0.120592	0	0.107646	0.147727	0.0297961
18S	653	U	300	369	669	1.29927	0.299049	0.565446	262	638	900	0.332162	0.0116007	0.249548	399	442	841	0.717722	0.0819413	0.418123	0.411039	0.129062		511	871	1382	1.07832	0.222313	0.519024	697	4815	5512	0.430578	0.0392041	0.30102	567	1319	1886	0.972284	0.211109	0.493106	0.437717	0.0972364
18S	654	U	885	1173	2058	0.315428	0	0	632	1178	1810	0.396988	0	0	1166	1027	2193	0.419209	0	0	0	0		1476	3183	4659	0.449623	0	0	1858	11554	13412	0.44792	0	0	1463	3421	4884	0.303414	0	0	0	0
18S	655	A	548	862	1410	0.093653	0	0.0856888	344	730	1074	0.10216	0	0.0927692	524	607	1131	0.195966	0	0.163977	0.114145	0.0353548		794	2912	3706	0.201702	0	0	1135	7507	8642	0.0430599	0	0	901	2545	3446	0.033646	0	0.0325599	0.0108533	0.0153489
18S	656	A	588	1088	1676	0.0749884	0	0	482	784	1266	0.0635885	0	0	737	524	1261	0.0153812	0	0	0	0		661	2310	2971	0.0608756	0	0.0574006	1207	8244	9451	0.128256	0	0	956	3018	3974	0.143944	0	0	0.0191335	0.0270589
18S	657	A	696	1174	1870	0.122151	0	0	386	611	997	0.278379	0	0.21793	527	689	1216	0.0124349	0	0.0122922	0.0767408	0.099962		885	3047	3932	0.197268	0	0	949	11690	12639	0.376557	0	0	1166	3356	4522	0.266686	0	0	0	0
18S	658	G	728	881	1609	0.104438	0	0.094615	533	735	1268	0.0114351	0	0.0113146	508	329	837	0.506457	0.0611496	0.336457	0.147462	0.137899		892	3442	4334	0.236476	0	0	835	7706	8541	0.0568121	0	0	982	1586	2568	0.337892	0	0.252629	0.0842097	0.11909
18S	659	U	880	1086	1966	0.0467548	0	0	586	578	1164	0.201793	0	0.16803	642	592	1234	0.0328835	0	0.0318616	0.0666305	0.0728706		1226	1217	2443	0.493867	0.0230686	0.330687	1236	6729	7965	0.00227355	0	0	1272	2095	3367	0.0164885	0	0	0.110229	0.155887
18S	660	U	866	1298	2164	0.103177	0	0	889	510	1399	0.0394444	0	0.0379737	664	794	1458	0.1053	0	0	0.0126579	0.017901		1452	1085	2537	0.464486	0.0557698	0.317252	1775	6145	7920	0.0405729	0	0	1926	2682	4608	0.317468	0	0	0.105751	0.149554
18S	661	G	529	1012	1541	0.296959	0.0046717	0.22908	371	612	983	0.538516	0.0904901	0.350254	399	498	897	0.487528	0.0811578	0.327989	0.302441	0.0526645		722	4682	5404	0.396296	0	0	572	5527	6099	0.143654	0	0.125628	1008	1042	2050	0.562436	0.100373	0.360086	0.161905	0.149226
18S	662	C	529	1325	1854	0.0761485	0	0.0707957	463	1290	1753	0.15928	0	0	345	697	1042	0.296996	0.0123201	0.229157	0.0999842	0.0958026		732	2154	2886	0.200339	0	0.16695	890	5819	6709	0.0570078	0	0	955	2052	3007	0.0203531	0	0	0.05565	0.078701
18S	663	U	732	1955	2687	0.282937	0	0	869	890	1759	0.128845	0	0	666	730	1396	0.0155651	0	0	0	0		1230	1680	2910	0.181995	0	0.154018	1627	2496	4123	0.465966	0.0333513	0.317909	1449	1531	2980	0.0557568	0	0	0.157309	0.129807
18S	664	G	789	1463	2252	0.164566	0	0	826	499	1325	0.177024	0	0.150496	613	754	1367	0.0128817	0	0	0.0501653	0.0709444		1200	3265	4465	0.323419	0	0	1006	2220	3226	0.636838	0.0375478	0.38914	908	997	1905	0.394509	0	0.283008	0.224049	0.164245
18S	665	C	1277	1545	2822	0.380781	0	0	1441	1386	2827	0.518965	0	0	1094	1120	2214	0.431116	0	0	0	0		2255	1934	4189	0.326258	0	0	2096	5093	7189	0.404174	0	0	1480	1746	3226	0.250962	0	0	0	0
18S	666	A	937	820	1757	0.000297055	0	0.000297135	1220	696	1916	0.259439	0	0	952	817	1769	0.276271	0	0	9.90452e-05	0.000140071		1614	1091	2705	0.043808	0	0.0419843	1505	2716	4221	0.0241855	0	0	1131	1482	2613	0.0945975	0	0	0.0139948	0.0197916
18S	667	G	648	645	1293	0.292547	0	0.226469	762	510	1272	0.0954875	0	0.0872269	632	565	1197	0.072519	0	0.0676683	0.127121	0.0707017		927	1343	2270	0.180806	0	0.153178	1103	1801	2904	0.295995	0	0.228453	740	915	1655	0.396967	0.00113815	0.284286	0.221973	0.0537205
18S	668	U	595	1070	1665	0.0971655	0	0	707	599	1306	0.00873927	0	0	632	707	1339	0.0933168	0	0	0	0		776	1472	2248	0.04108	0	0.0394759	988	2166	3154	0.0656031	0	0.0615826	704	1348	2052	0.124999	0	0.111158	0.0707389	0.0299718
18S	669	U	786	1190	1976	0.337801	0	0	928	838	1766	0.380236	0	0	1019	906	1925	0.445956	0	0	0	0		926	2205	3131	0.356045	0	0	1211	2489	3700	0.221715	0	0	815	1862	2677	0.19576	0	0	0	0
18S	670	A	85	25	110	10.9877	0.79988	0.91727	117	3	120	8.67971	0.735518	0.897457	113	2	115	9.1477	0.776442	0.902222	0.90565	0.00844404	1	76	33	109	18.397	0.875658	0.94889	96	218	314	8.49993	0.742007	0.895035	80	144	224	9.5957	0.781775	0.906002	0.916643	0.023238	1
18S	671	A	537	479	1016	0.0745876	0	0.069474	493	308	801	0.22189	0	0.181781	528	314	842	0.183406	0	0.155137	0.135464	0.047913		402	948	1350	0.266609	0	0.210614	547	1659	2206	0.147239	0	0.128392	412	1822	2234	0.0302759	0	0	0.113002	0.0866686
18S	672	A	439	473	912	0.0640136	0	0.0602244	518	282	800	0.063823	0	0.0600645	509	360	869	0.0279693	0	0.0272388	0.0491759	0.015512		411	911	1322	0.137398	0	0.120881	577	1658	2235	0.0229875	0	0	423	1952	2375	0.115128	0	0	0.0402936	0.0569837
18S	673	A	340	444	784	0.147077	0	0.128362	253	177	430	0.852591	0	0.460793	349	400	749	0.120978	0	0.10805	0.232401	0.16171		248	1185	1433	0.056865	0	0	313	1730	2043	0.0297565	0	0	251	2202	2453	0.170479	0	0	0	0
18S	674	A	218	350	568	0.541144	0	0.351532	220	182	402	0.87979	0	0.468644	274	306	580	0.429528	0	0.30083	0.373669	0.0702752		338	860	1198	0.0890464	0	0.0818282	215	2126	2341	0.211794	0	0	255	3275	3530	0.457403	0	0	0.0272761	0.0385742
18S	675	G	203	248	451	0.841396	0.0310588	0.457483	260	114	374	0.934074	0	0.483624	255	255	510	0.568319	0	0.362827	0.434645	0.0518917		382	654	1036	0.228801	0	0.186345	296	1342	1638	0.121232	0	0.108183	224	1540	1764	0.19604	0	0.163985	0.152838	0.0328686
18S	676	C	219	334	553	0.412415	0	0.292366	378	627	1005	0.406207	0	0	318	306	624	0.201031	0	0.167605	0.153324	0.119784		426	450	876	0.374104	0	0.272479	454	960	1414	0.183031	0	0.154806	320	1718	2038	0.0485696	0	0	0.142428	0.111583
18S	677	U	65	968	1033	0.273727	0	0	111	348	459	0.489444	0	0.329089	81	531	612	0.260721	0	0.207071	0.17872	0.135838		154	924	1078	0.119524	0	0.106852	152	868	1020	0.663162	0.0527273	0.398971	193	1844	2037	0.0712899	0	0	0.168608	0.168631
18S	678	C	384	727	1111	0.331944	0	0	509	757	1266	0.521179	0	0	358	705	1063	0.311216	0	0	0	0		752	634	1386	0.178947	0	0	595	1567	2162	0.293954	0	0	521	1299	1820	0.0304778	0	0	0	0
18S	679	G	219	473	692	0.0829726	0	0.0767178	261	301	562	0.157865	0	0.136551	254	716	970	0.269321	0	0	0.0710895	0.0558884		304	588	892	0.25945	0	0.206186	271	681	952	0.605363	0	0.377335	253	844	1097	0.50081	0	0.333896	0.305805	0.0726396
18S	680	U	216	589	805	0.079818	0	0	333	372	705	0.0752912	0	0	241	697	938	0.211797	0	0	0	0		557	981	1538	0.340192	0	0	331	1584	1915	0.281025	0	0	440	1375	1815	0.228451	0	0	0	0
18S	681	A	195	554	749	0.00168889	0	0.00168829	258	395	653	0.0256541	0	0.0250498	279	454	733	0.0444444	0	0.0426088	0.0231156	0.0167616		490	1182	1672	0.422986	0	0	288	1918	2206	0.426748	0	0	334	1929	2263	0.479628	0	0	0	0
18S	682	G	127	956	1083	0.350492	0	0	207	300	507	0.345188	0	0.256986	176	831	1007	0.290289	0	0	0.0856619	0.121144		257	1078	1335	0.283782	0	0	143	339	482	1.86142	0.200733	0.650994	153	350	503	1.47954	0.250439	0.597177	0.416057	0.295016
18S	683	U	169	192	361	1.2674	0.207284	0.559649	151	280	431	0.662629	0	0.399098	118	140	258	2.1332	0.338114	0.681678	0.546808	0.115719		275	193	468	1.20095	0.220386	0.546179	199	310	509	1.69832	0.146038	0.629857	194	149	343	2.52506	0.309582	0.716908	0.630982	0.0697044
18S	684	U	108	834	942	0.185519	0	0	228	805	1033	0.328648	0	0	140	770	910	0.171155	0	0	0	0		360	353	713	0.416869	0	0.29451	208	1927	2135	0.430155	0	0	327	411	738	0.562141	0	0.360165	0.218225	0.156619
18S	685	G	10	91	101	7.73366	0.718968	0.886496	11	63	74	10.0178	0.766407	0.910339	16	92	108	6.91621	0.684247	0.874691	0.890508	0.0148275	1	34	25	59	17.7846	0.846585	0.947606	12	94	106	12.799	0.776908	0.928159	16	28	44	28.6059	0.87278	0.966949	0.947571	0.0158357	1
18S	686	G	104	843	947	0.117429	0	0	275	620	895	0.108631	0	0	188	1123	1311	0.446054	0	0	0	0		429	595	1024	0.103339	0	0.0937429	322	1532	1854	0.255508	0	0	310	597	907	0.486405	0	0.327478	0.140407	0.137704
18S	687	A	95	615	710	0.263291	0	0.208649	200	566	766	0.121918	0	0.108796	135	549	684	0.165564	0	0.142224	0.153223	0.0415003		373	525	898	0.512013	0	0.338879	265	1055	1320	0.163975	0	0.140967	287	1369	1656	0.190183	0	0	0.159949	0.138997
18S	688	U	74	422	496	0.892265	0.0686659	0.472035	151	317	468	0.988107	0.113239	0.497543	69	254	323	1.59276	0.174901	0.615043	0.528207	0.0622795		192	539	731	1.04778	0.0726871	0.512009	272	330	602	1.77658	0.281174	0.640227	239	317	556	1.69751	0.201357	0.629706	0.593981	0.0581219
18S	689	C	144	1305	1449	0.424667	0	0	240	1323	1563	0.438853	0	0	174	878	1052	0.286145	0	0	0	0		492	635	1127	0.397449	0	0.284591	496	1313	1809	0.0812646	0	0	430	1647	2077	0.295263	0	0	0.0948636	0.134157
18S	690	U	80	1313	1393	0.374119	0	0	149	1066	1215	0.215305	0	0	95	1052	1147	0.337631	0	0	0	0		295	1499	1794	0.0937604	0	0	422	1394	1816	0.0392038	0	0	284	1947	2231	0.315576	0	0	0	0
18S	691	U	36	1342	1378	0.366441	0	0	70	1247	1317	0.27417	0	0	47	1230	1277	0.406825	0	0	0	0		118	2104	2222	0.247788	0	0	168	2336	2504	0.329009	0	0	161	3191	3352	0.567946	0	0	0	0
18S	692	G	70	1042	1112	0.169552	0	0	152	1154	1306	0.249086	0	0	63	736	799	0.0609583	0	0.0575237	0.0191746	0.0271169		158	2524	2682	0.370638	0	0	294	2275	2569	0.322715	0	0	199	2095	2294	0.308942	0	0	0	0
18S	693	G	136	784	920	0.0072747	0	0	187	739	926	0.0720364	0	0.0672636	116	541	657	0.253546	0	0.202509	0.0899241	0.0842123		324	4211	4535	0.68021	0	0	452	2441	2893	0.435395	0	0	332	1517	1849	0.161231	0	0	0	0
18S	694	G	146	372	518	0.772062	0.124395	0.43616	135	539	674	0.448115	0	0.309764	98	395	493	0.664507	0.0203426	0.399708	0.381877	0.0531188		324	1776	2100	0.216611	0	0	484	1445	1929	0.131002	0	0	275	826	1101	0.366294	0	0.268271	0.0894237	0.126464
18S	695	A	122	503	625	0.393042	0.00671034	0.282471	163	1100	1263	0.295086	0	0	113	541	654	0.2219	0	0.18183	0.154767	0.116895		274	1211	1485	0.0740093	0	0.0689525	376	1158	1534	0.0799855	0	0.0741064	265	1167	1432	0.0443592	0	0	0.0476863	0.0337849
18S	696	G	122	544	666	0.178128	0	0.151388	80	583	663	0.310124	0	0.236986	98	398	496	0.552135	0	0.356188	0.248187	0.0839835		159	630	789	0.909887	0.0660672	0.476725	315	617	932	0.692867	0.114437	0.409545	187	376	563	1.2896	0.197683	0.563679	0.483316	0.0630971
18S	697	C	90	816	906	0.248303	0	0	93	975	1068	0.296778	0	0	65	1139	1204	0.472374	0	0	0	0		193	644	837	0.562808	0	0.360401	218	1291	1509	0.0978146	0	0	129	1030	1159	0.106868	0	0	0.120134	0.169895
18S	698	G	123	629	752	0.163391	0	0	93	468	561	0.301898	0	0.232208	106	881	987	0.396694	0	0	0.0774027	0.109464		101	339	440	1.60975	0.118063	0.617358	163	870	1033	0.193101	0	0.161979	117	547	664	0.304428	0	0.23365	0.337662	0.199927
18S	699	G	233	542	775	0.261183	0	0	153	424	577	0.150135	0	0.130733	119	607	726	0.197891	0	0	0.0435777	0.0616282		255	415	670	0.378159	0	0.274691	442	363	805	0.352537	0	0.260888	156	235	391	0.90958	0.13468	0.476962	0.337514	0.0987658
18S	700	G	197	227	424	0.342039	0.0649191	0.255313	140	176	316	1.04816	0.192529	0.512546	146	270	416	0.386278	0	0.279127	0.348995	0.116056		125	286	411	0.688026	0.0137407	0.408179	326	541	867	0.0542115	0	0.05148	111	480	591	0.0336524	0	0.0326101	0.16409	0.172769
18S	701	C	113	285	398	0.360763	0.0528239	0.265607	103	615	718	0.216721	0	0	84	387	471	0.120009	0	0.107353	0.12432	0.109095		39	406	445	0.272696	0	0.214644	176	576	752	0.0684374	0	0.0641334	84	369	453	0.209373	0	0.173441	0.15074	0.063508
18S	702	G	159	233	392	0.271501	0	0.213956	135	288	423	0.23923	0	0.193415	59	270	329	0.490909	0	0.329939	0.24577	0.0601042		11	261	272	0.886895	0.156048	0.470943	120	424	544	0.330928	0	0.248988	45	402	447	0.0258929	0	0.0252944	0.248408	0.181936
18S	703	G	171	192	363	0.264621	0	0.209705	156	320	476	0.012369	0	0.0122432	62	250	312	0.431097	0	0.301909	0.174619	0.12083		110	352	462	0.000215983	0	0	205	342	547	0.21253	0	0.175543	29	295	324	0.333265	0	0.25054	0.142027	0.104992
18S	704	G	305	130	435	0.0817278	0	0	245	161	406	0.0741196	0	0.0691632	187	110	297	0.273937	0	0.2156	0.094921	0.089883		234	203	437	0.00961441	0	0.00954444	238	267	505	0.148748	0	0.12971	108	226	334	0.10126	0	0.0921994	0.0771515	0.0501983
18S	705	C	262	201	463	0.243918	0	0	317	268	585	0.346189	0	0	184	196	380	0.183115	0	0	0	0		388	227	615	0.318615	0	0	329	317	646	0.228044	0	0	194	205	399	0.194556	0	0	0	0
18S	706	G	312	136	448	0.318337	0	0	292	157	449	0.184889	0	0	184	171	355	0.228558	0	0	0	0		420	154	574	0.267729	0	0	430	224	654	0.322358	0	0	186	196	382	0.213316	0	0	0	0
18S	707	G	186	111	297	0.0154735	0	0	182	105	287	0.283603	0.00959598	0.221542	104	88	192	0.412608	0.0745296	0.293165	0.171569	0.124792		154	85	239	0.948472	0.199289	0.487821	226	67	293	0.460922	0.0890322	0.316237	92	66	158	0.856883	0.233846	0.463031	0.422363	0.0757217
18S	708	U	63	75	138	1.02286	0.253864	0.507456	102	88	190	0.794008	0.181933	0.443884	68	101	169	0.489739	0.090767	0.330044	0.427128	0.0733905		118	240	358	0.259331	0	0.206384	120	73	193	1.01816	0.206917	0.50579	80	84	164	0.636768	0.125172	0.390486	0.367553	0.123303
18S	709	C	91	103	194	0.29567	0	0.229105	117	151	268	0.210657	0	0.174538	41	110	151	0.670102	0.0967157	0.402821	0.268821	0.0973356		68	277	345	0.405812	0.0238518	0.289262	215	162	377	0.0760729	0	0	96	112	208	0.258373	0	0.206107	0.165123	0.121595
18S	710	C	54	157	211	0.0877358	0	0.0810105	107	161	268	0.163197	0	0.14075	94	187	281	0.175808	0	0	0.0739202	0.0576793		159	277	436	0.129087	0	0.114561	171	124	295	0.177402	0	0.151106	97	170	267	0.027529	0	0	0.0885558	0.0643712
18S	711	G	53	76	129	0.723248	0.0668433	0.421582	70	86	156	1.10283	0.19611	0.526044	76	67	143	0.766744	0.104252	0.4357	0.461109	0.0462765		81	372	453	0.156804	0	0.135808	81	102	183	0.991244	0.0749226	0.499164	49	109	158	0.831097	0.0670298	0.455444	0.363472	0.161969
18S	712	C	43	105	148	0.38516	0	0.279416	89	156	245	0.280623	0	0.219828	72	123	195	0.250227	0	0.200965	0.233403	0.0334348		85	566	651	0.199318	0	0	90	105	195	0.930215	0.0631603	0.4832	72	148	220	0.398039	0	0.285637	0.256279	0.198355
18S	713	C	29	111	140	0.379827	0.015158	0.276693	70	270	340	0.105018	0	0	46	178	224	0.0524938	0	0.0500872	0.108927	0.120378		133	444	577	0.0646098	0	0	90	147	237	0.606723	0.0591065	0.378605	68	154	222	0.437768	0	0.30543	0.228012	0.163973
18S	714	G	53	63	116	0.706743	0.18084	0.416173	82	168	250	0.331297	0.022174	0.2496	60	152	212	0.154564	0	0.134419	0.266731	0.115661		126	257	383	0.539583	0.0652644	0.351067	104	86	190	1.27208	0.289476	0.561167	55	119	174	1.06673	0.226679	0.517575	0.476603	0.0905336
18S	715	C	74	169	243	0.20082	0	0	122	340	462	0.310343	0	0	116	284	400	0.416625	0	0	0	0		291	538	829	0.340268	0	0	248	212	460	0.020294	0	0	151	368	519	0.314573	0	0	0	0
18S	716	G	140	61	201	0.0133113	0	0.013201	263	76	339	0.00771242	0	0.0076758	180	50	230	0.108562	0	0.0983142	0.0397303	0.0414864		312	324	636	0.093145	0	0	405	170	575	0.16034	0	0	181	247	428	0.0692826	0	0	0	0
18S	717	A	224	67	291	0.331887	0	0	305	216	521	0.386058	0	0	307	107	414	0.451432	0	0	0	0		372	482	854	0.366745	0	0	522	182	704	0.273853	0	0	248	367	615	0.354762	0	0	0	0
18S	718	G	131	112	243	0.143124	0	0	253	148	401	0.156136	0	0	148	101	249	0.00888889	0	0	0	0		361	328	689	0.213833	0	0	550	264	814	0.325644	0	0	346	342	688	0.403822	0	0	0	0
18S	719	G	144	50	194	0.153105	0	0.13337	229	72	301	0.146836	0	0.128406	95	56	151	0.745541	0.0927375	0.428728	0.230168	0.140418		226	223	449	0.243309	0	0.196045	377	154	531	0.232435	0	0.188886	126	176	302	0.580235	0.0428523	0.367951	0.250961	0.0827762
18S	720	C	188	83	271	0.199428	0	0	215	234	449	0.305506	0	0	133	98	231	0.0726533	0	0.0680056	0.0226685	0.0320581		247	271	518	0.0336545	0	0.0326195	413	346	759	0.127178	0	0	211	283	494	0.0718519	0	0	0.0108732	0.015377
18S	721	G	181	51	232	0.0360992	0	0	138	62	200	0.62775	0.123223	0.386837	245	28	273	0.109002	0	0	0.128946	0.182357		270	58	328	0.719048	0.135723	0.419023	361	271	632	0.137248	0	0.120852	195	274	469	0.0133806	0	0	0.179958	0.176097
18S	722	A	109	78	187	0.206087	0	0.17163	127	192	319	0.0873958	0	0	92	65	157	0.616737	0.0489716	0.382969	0.184866	0.156627		223	210	433	0.242038	0	0.195234	312	403	715	0.0349628	0	0.0338273	156	336	492	0.079716	0	0	0.0763537	0.0851877
18S	723	G	69	79	148	0.549068	0.114986	0.355993	76	114	190	0.517219	0.0669983	0.34208	108	52	160	0.595445	0.0429042	0.374674	0.357582	0.013354		178	137	315	0.684142	0.067448	0.406991	204	421	625	0.183262	0	0.155088	116	262	378	0.179595	0	0.152593	0.238224	0.11934
18S	724	U	112	136	248	0.115261	0	0	159	130	289	0.0976245	0	0	123	110	233	0.0378443	0	0.0366151	0.012205	0.0172605		135	213	348	0.435403	0	0.303938	196	564	760	0.0549861	0	0	89	340	429	0.0400258	0	0	0.101313	0.143278
18S	725	C	146	169	315	0.340577	0	0	144	122	266	0.0542655	0	0	231	169	400	0.44123	0	0	0	0		271	474	745	0.414418	0	0	426	847	1273	0.496354	0	0	196	416	612	0.419213	0	0	0	0
18S	726	A	58	101	159	0.404097	0.0311202	0.289085	90	79	169	0.526536	0.0728923	0.346256	93	51	144	0.782989	0.0961807	0.440849	0.35873	0.062582		90	455	545	0.1721	0	0	187	392	579	0.23205	0	0.188608	53	213	266	0.434499	0.0327649	0.303685	0.164098	0.125185
18S	727	C	74	110	184	0.162282	0	0.140276	63	111	174	0.397206	0.0404095	0.285454	181	100	281	0.151221	0	0	0.14191	0.116542		132	609	741	0.44976	0	0	312	468	780	0.16274	0	0	84	192	276	0.28199	0	0.220584	0.0735279	0.103984
18S	728	C	48	173	221	0.0474975	0	0	84	168	252	0.0602108	0	0	194	189	383	0.426273	0	0	0	0		124	528	652	0.371652	0	0	307	573	880	0.314088	0	0	104	394	498	0.401202	0	0	0	0
18S	729	G	45	172	217	0.10051	0	0.0917124	56	129	185	0.417861	0	0.295834	111	126	237	0.0510271	0	0.0487446	0.14543	0.107788		73	165	238	0.94463	0.0683843	0.486811	177	46	223	1.94628	0.35228	0.661591	70	108	178	0.790068	0.0947557	0.442744	0.530382	0.0945071
18S	730	C	77	231	308	0.216469	0	0	126	212	338	0.253917	0	0	97	134	231	0.0737069	0	0.0689238	0.0229746	0.032491		136	121	257	0.762489	0.0251475	0.433574	256	273	529	0.105765	0	0.0958124	128	95	223	0.309375	0	0.237085	0.255491	0.138503
18S	731	C	94	57	151	0.739547	0	0.426752	140	118	258	0.0135564	0	0.0134262	137	47	184	0.359039	0	0.265241	0.23514	0.170077		198	53	251	0.776543	0.0330206	0.438088	417	82	499	0.0952222	0	0.0871023	155	16	171	0.608398	0	0.379636	0.301609	0.153544
18S	732	C	114	62	176	0.483176	0	0.327017	157	124	281	0.0405043	0	0	113	94	207	0.156891	0	0.13618	0.154399	0.134124		274	9	283	0.484781	0	0.327276	553	19	572	0.151619	0	0	259	20	279	0.140079	0	0	0.109092	0.154279
18S	733	G	73	86	159	0.691319	0	0.410262	69	110	179	0.593889	0	0.373907	102	54	156	0.573178	0.0235532	0.365825	0.383331	0.0193264		178	42	220	0.890799	0.0257505	0.472253	246	83	329	0.474411	0	0.322426	155	63	218	0.0943683	0	0.0865922	0.293757	0.158745
18S	734	U	26	225	251	0.0509259	0	0.0486418	43	190	233	0.227825	0	0.1862	51	99	150	0.631641	0.0365087	0.388698	0.207846	0.139668		228	186	414	0.0789558	0	0	167	132	299	0.545926	0	0.353902	90	31	121	1.04572	0.093807	0.513231	0.289044	0.214486
18S	735	C	160	533	693	0.683125	0	0	229	383	612	0.597354	0	0	277	183	460	0.560135	0	0	0	0		611	228	839	0.610423	0	0	300	461	761	0.484485	0	0	252	179	431	0.534697	0	0	0	0
18S	736	C	73	236	309	0.129355	0	0	69	150	219	0.387323	0	0.280105	101	85	186	0.262567	0	0.208847	0.162984	0.118862		216	161	377	0.0603175	0	0.0570285	169	100	269	0.789712	0.080771	0.442166	105	47	152	0.617429	0.0100302	0.383284	0.294159	0.169391
18S	737	C	50	187	237	0.187302	0	0.158314	79	127	206	0.560386	0	0.360248	100	138	238	0.0633659	0	0.0598253	0.192796	0.125047		241	126	367	0.172886	0	0.147745	176	133	309	0.710932	0	0.416308	109	42	151	0.810088	0.00564826	0.449173	0.337742	0.135017
18S	738	C	68	151	219	0.376414	0	0.274381	107	284	391	0.158078	0	0	129	140	269	0.0609877	0	0.0576833	0.110688	0.118119		271	113	384	0.208514	0	0.172909	271	246	517	0.0954526	0	0.0872891	142	114	256	0.185949	0	0.15731	0.139169	0.0372334
18S	739	G	59	86	145	1.23577	0.13553	0.554425	46	122	168	1.23682	0.150593	0.554403	80	79	159	1.10875	0.0727797	0.527348	0.545392	0.0127588		192	110	302	0.691272	0.0560573	0.409528	161	91	252	1.59758	0.250831	0.615964	77	94	171	1.03359	0.116723	0.509716	0.511736	0.0842892
18S	740	C	68	90	158	1.13075	0.172729	0.532252	67	166	233	0.65584	0.00850271	0.397102	126	118	244	0.435193	0	0.304094	0.411149	0.0936732		237	133	370	0.442917	0.0179209	0.307534	201	228	429	0.598811	0.0156157	0.375081	119	179	298	0.224861	0	0.184083	0.288899	0.07908
18S	741	C	181	104	285	0.182906	0	0.155083	142	144	286	0.410801	0	0.291904	162	40	202	0.948495	0.122876	0.488017	0.311668	0.136636		282	120	402	0.414943	0.0392654	0.293773	391	211	602	0.250562	0	0.200626	165	87	252	0.684058	0.104769	0.407152	0.300517	0.0844487
18S	742	C	275	74	349	0.0685714	0	0	303	148	451	0.131072	0	0	179	73	252	0.651603	0.118357	0.395474	0.131825	0.186428		466	92	558	0.00773206	0	0.00768638	684	206	890	0.117546	0	0	352	81	433	0.0424731	0	0.0408329	0.0161731	0.0177172
18S	743	C	346	101	447	0.240848	0	0	481	158	639	0.373715	0	0	562	104	666	0.373796	0	0	0	0		703	87	790	0.273227	0	0	1167	245	1412	0.439734	0	0	555	126	681	0.289801	0	0	0	0
18S	744	U	351	169	520	0.306398	0	0	512	192	704	0.402285	0	0	610	145	755	0.388595	0	0	0	0		669	164	833	0.27454	0	0	1003	308	1311	0.334646	0	0	665	123	788	0.312576	0	0	0	0
18S	745	U	266	165	431	0.0778549	0	0	326	200	526	0.156146	0	0	501	217	718	0.290527	0	0	0	0		550	271	821	0.22717	0	0	774	348	1122	0.155447	0	0	529	114	643	0.0667702	0	0	0	0
18S	746	G	189	154	343	0.289664	0	0.225112	181	109	290	0.740512	0.0813951	0.426298	249	75	324	0.894803	0.110838	0.473009	0.374806	0.107554		331	232	563	0.243105	0	0.195842	440	152	592	0.852708	0.12528	0.460669	325	106	431	0.602958	0.0743097	0.376697	0.344403	0.1105
18S	747	C	284	115	399	0.176889	0	0.150622	206	244	450	0.128726	0	0.11427	423	153	576	0.107298	0	0.0970529	0.120648	0.0223297		434	413	847	0.170322	0	0	778	422	1200	0.101934	0	0	474	269	743	0.0468489	0	0	0	0
18S	748	C	298	87	385	0.256218	0.0197697	0.204381	240	205	445	0.141131	0	0.12392	406	167	573	0.163376	0	0.140643	0.156315	0.0346669		417	199	616	0.211021	0.0116225	0.174484	654	490	1144	0.0431053	0	0	601	215	816	0.106542	0	0	0.0581614	0.0822526
18S	749	U	409	143	552	0.139944	0	0	345	169	514	0.0202158	0	0	371	273	644	0.0618949	0	0.0583725	0.0194575	0.027517		349	329	678	0.085567	0	0.0789295	295	463	758	0.498961	0.0435995	0.333164	560	204	764	0.00822077	0	0	0.137364	0.142151
18S	750	C	457	118	575	0.187307	0	0	376	191	567	0.150685	0	0	603	273	876	0.260889	0	0	0	0		474	220	694	0.0133813	0	0.0132234	718	427	1145	0.0758581	0	0	754	258	1012	0.289668	0	0	0.00440779	0.00623356
18S	751	U	363	170	533	0.124241	0	0	267	90	357	0.371291	0	0.271313	482	281	763	0.1516	0	0	0.0904376	0.127898		379	330	709	0.0547105	0	0	764	483	1247	0.169347	0	0	524	111	635	0.18681	0	0.157614	0.052538	0.0742999
18S	752	C	458	189	647	0.296965	0	0	570	234	804	0.451594	0	0	747	264	1011	0.407631	0	0	0	0		426	427	853	0.267864	0	0	1218	508	1726	0.435868	0	0	843	247	1090	0.359446	0	0	0	0
18S	753	G	503	123	626	0.252809	0	0	462	121	583	0.186967	0	0	701	208	909	0.332405	0	0	0	0		612	341	953	0.370277	0	0	877	270	1147	0.0846593	0	0	767	151	918	0.214315	0	0	0	0
18S	754	G	229	114	343	0.485013	0.076094	0.327246	165	66	231	1.2318	0.265086	0.552999	271	147	418	0.579554	0.082991	0.367465	0.415903	0.0983221		231	430	661	0.0691843	0	0	435	223	658	0.666734	0.132908	0.400389	357	127	484	0.568522	0.125187	0.362934	0.254441	0.180566
18S	755	C	307	92	399	0.311778	0.0063441	0.23813	275	249	524	0.0350688	0	0	387	128	515	0.281223	0	0.219828	0.152653	0.1082		217	280	497	0.279496	0	0.218785	495	323	818	0.347538	0	0.25814	504	172	676	0.0855572	0	0.0789215	0.185282	0.0769053
18S	756	G	208	56	264	1.12172	0.254623	0.529626	220	109	329	0.649731	0.0838371	0.394565	274	61	335	1.05046	0.192493	0.51305	0.47908	0.0601432		152	81	233	1.8463	0.371224	0.649642	518	207	725	0.587297	0.109102	0.37032	278	118	396	0.907613	0.212142	0.476414	0.498792	0.115125
18S	757	C	344	50	394	0.477215	0.0738554	0.323605	262	126	388	0.483976	0.0171644	0.326701	370	88	458	0.503123	0.0249078	0.335204	0.328503	0.00490386		223	109	332	0.996396	0.194697	0.499849	785	275	1060	0.0905749	0	0.0831243	454	181	635	0.147921	0	0.129037	0.237337	0.186568
18S	758	C	452	35	487	0.212773	0	0.17574	524	48	572	0.0495831	0	0.0473194	367	42	409	0.726206	0.111282	0.42129	0.214783	0.155149		338	89	427	0.546417	0.0774831	0.353879	622	421	1043	0.151533	0	0.131702	514	163	677	0.0908063	0	0.0833597	0.189647	0.117795
18S	759	C	589	56	645	0.0906261	0	0	455	51	506	0.236336	0	0.191464	486	38	524	0.33528	0.0100306	0.251452	0.147639	0.10723		529	72	601	0.0758213	0	0.0705866	695	355	1050	0.153663	0	0.133306	624	101	725	0.00659627	0	0	0.0679641	0.0544535
18S	760	C	668	28	696	0.142675	0	0	549	44	593	0.155331	0	0.134643	831	66	897	0.224053	0	0	0.0448811	0.0634715		717	116	833	0.213349	0	0	1129	214	1343	0.0769015	0	0	751	62	813	0.11036	0	0	0	0
18S	761	C	777	59	836	0.293004	0	0	818	99	917	0.2435	0	0	1007	63	1070	0.342463	0	0	0	0		856	102	958	0.298853	0	0	1368	351	1719	0.282261	0	0	859	111	970	0.271267	0	0	0	0
18S	762	U	811	80	891	0.349165	0	0	664	54	718	0.0474733	0	0.045382	820	89	909	0.187253	0	0	0.0151273	0.0213933		685	128	813	0.112517	0	0	1090	301	1391	0.0708174	0	0	589	82	671	0.0964947	0	0.0881225	0.0293742	0.0415413
18S	763	C	942	74	1016	0.451098	0	0	1001	114	1115	0.33628	0	0	972	129	1101	0.331297	0	0	0	0		735	143	878	0.133788	0	0	1350	360	1710	0.257809	0	0	786	203	989	0.297003	0	0	0	0
18S	764	G	465	43	508	0.17959	0	0.152502	844	40	884	0.0827119	0	0	652	71	723	0.111971	0	0.100821	0.0844408	0.0633267		587	82	669	0.244577	0	0.19675	1340	257	1597	0.177082	0	0	666	103	769	0.0624242	0	0	0.0655834	0.0927489
18S	765	A	402	98	500	0.156931	0	0.135878	637	58	695	0.246105	0	0.197727	620	87	707	0.196343	0	0.164314	0.165973	0.025277		449	201	650	0.350043	0.0602557	0.259578	1029	226	1255	0.12224	0	0.109002	506	129	635	0.181639	0	0.153922	0.174168	0.0631172
18S	766	U	452	85	537	0.0477489	0	0.0456538	1201	169	1370	0.366099	0	0	894	210	1104	0.185822	0	0	0.0152179	0.0215214		874	331	1205	0.272987	0	0	1403	163	1566	0.0199177	0	0	770	144	914	0.153248	0	0	0	0
18S	767	G	209	57	266	1.12655	0.200482	0.530689	480	54	534	0.894995	0.144142	0.47276	335	102	437	1.35632	0.225292	0.576167	0.526539	0.0423175		500	280	780	0.251757	0	0.201329	568	167	735	1.34541	0.241024	0.573968	278	48	326	1.71923	0.306337	0.632961	0.469419	0.191092
18S	768	C	157	82	239	1.28991	0.221351	0.564328	589	151	740	0.364852	0	0.267585	444	96	540	0.934319	0.115859	0.483484	0.438466	0.125258		578	178	756	0.385263	0.0420471	0.278381	728	166	894	1.02844	0.172996	0.50729	383	144	527	0.68609	0.0577866	0.407369	0.39768	0.0937026
18S	769	U	169	145	314	0.679259	0.0770048	0.405265	526	124	650	0.707117	0.106711	0.41459	492	148	640	0.770914	0.100937	0.435704	0.41852	0.0127331		571	312	883	0.304512	9.46144e-05	0.233633	790	183	973	1.16734	0.192925	0.53886	304	122	426	1.4057	0.247664	0.58489	0.452461	0.155872
18S	770	C	377	100	477	0.0539749	0	0.0513126	912	157	1069	0.05108	0	0.0486408	819	186	1005	0.191816	0	0.161078	0.0870107	0.0523852		910	180	1090	0.174509	0	0.148696	1610	261	1871	0.227986	0	0.185739	712	156	868	0.286127	0	0.222671	0.185702	0.0302002
18S	771	U	432	115	547	0.0662003	0	0	914	176	1090	0.0644261	0	0.0605788	1034	253	1287	0.0259058	0	0	0.0201929	0.0285571		875	198	1073	0.307863	0.0134022	0.235561	1983	312	2295	0.0978707	0	0.0891813	943	220	1163	0.0662753	0	0.062206	0.128983	0.0761628
18S	772	U	631	222	853	0.436742	0	0	1710	207	1917	0.432829	0	0	2080	344	2424	0.51167	0	0	0	0		1303	284	1587	0.0853694	0	0	3676	467	4143	0.3926	0	0	1621	261	1882	0.322753	0	0	0	0
18S	773	A	372	120	492	0.143994	0	0.126093	1148	151	1299	0.121427	0	0	1301	368	1669	0.228942	0	0	0.042031	0.0594408		912	602	1514	0.0120059	0	0.0118712	2173	435	2608	0.0891487	0	0.0818805	1141	389	1530	0.0867552	0	0	0.0312506	0.0361273
18S	774	G	234	374	608	0.0219121	0	0	867	169	1036	0.161706	0	0.139312	805	234	1039	0.369135	0	0.269801	0.136371	0.110165		1132	670	1802	0.115641	0	0	2542	227	2769	0.0803049	0	0.0743602	858	155	1013	0.55652	0	0.357768	0.144043	0.154145
18S	775	C	381	259	640	0.0356561	0	0	1541	434	1975	0.453183	0	0	1644	391	2035	0.358017	0	0	0	0		1912	460	2372	0.339898	0	0	4700	804	5504	0.499699	0	0	1988	382	2370	0.366179	0	0	0	0
18S	776	U	301	370	671	0.0578208	0	0	1169	405	1574	0.308952	0	0	1308	683	1991	0.353704	0	0	0	0		2101	641	2742	0.446664	0	0	3672	960	4632	0.382757	0	0	1885	658	2543	0.394078	0	0	0	0
18S	777	G	234	275	509	0.26549	0	0.210118	548	275	823	0.31784	0	0.241405	347	796	1143	0.133178	0	0.117617	0.189713	0.0525556		1345	360	1705	0.0627654	0	0	2747	846	3593	0.197332	0	0	1671	609	2280	0.309357	0	0	0	0
18S	778	A	107	235	342	0.928183	0.126887	0.482106	149	409	558	0.844961	0.105524	0.458428	43	840	883	0.368012	0	0.269235	0.403256	0.0952592		709	745	1454	0.092585	0	0.0847927	880	1392	2272	0.276913	0	0.216936	525	827	1352	0.215406	0	0.177338	0.159689	0.0553718
18S	779	G	75	1048	1123	0.492497	0	0	143	592	735	0.240897	0	0.194344	227	593	820	0.302612	0	0.232529	0.142291	0.101815		635	779	1414	0.121186	0	0.108155	1147	790	1937	0.421288	0.0111261	0.29652	519	654	1173	0.361272	0.0175726	0.265559	0.223412	0.0824729
18S	780	U	114	783	897	0.315627	0	0	251	843	1094	0.270634	0	0	132	1302	1434	0.372319	0	0	0	0		1022	578	1600	0.0309043	0	0	1190	1030	2220	0.168998	0	0.144622	594	970	1564	0.0443592	0	0	0.0482074	0.0681756
18S	781	G	89	447	536	0.259135	0	0.206109	73	558	631	0.282507	0	0.220549	101	479	580	0.624594	0.0398185	0.384869	0.270509	0.0810794		562	275	837	0.951538	0.168028	0.487882	917	605	1522	0.714883	0.100158	0.417029	474	799	1273	0.212498	0	0.17537	0.360094	0.133784
18S	782	U	63	497	560	0.221668	0	0.181712	77	427	504	0.506887	0	0.336823	78	633	711	0.170287	0	0.145684	0.221406	0.0829267		490	269	759	1.14944	0.217908	0.535091	869	688	1557	0.575396	0.0727584	0.365388	351	880	1231	0.22261	0	0.182199	0.360892	0.144103
18S	783	C	82	228	310	1.39421	0.256805	0.583109	137	144	281	1.75252	0.33306	0.637518	81	194	275	1.9599	0.359457	0.662963	0.627863	0.0333072		730	203	933	0.783179	0.167023	0.439468	1036	771	1807	0.359605	0.000837957	0.2646	477	748	1225	0.216467	0	0.178067	0.294045	0.108728
18S	784	C	158	310	468	0.613646	0.0930923	0.380789	226	263	489	0.615079	0.0809943	0.381317	83	185	268	1.99765	0.384291	0.667232	0.476446	0.134906		1014	286	1300	0.323802	0.0505665	0.244742	1237	856	2093	0.211467	0	0.174623	533	592	1125	0.318936	0.050347	0.241976	0.220447	0.0324222
18S	785	C	243	565	808	0.0631369	0	0	386	502	888	0.128159	0	0	171	531	702	0.0828671	0	0.0766263	0.0255421	0.036122		1915	475	2390	0.297077	0	0	1602	1189	2791	0.0827682	0	0	697	657	1354	0.0730381	0	0.0681135	0.0227045	0.032109
18S	786	G	165	687	852	0.0808389	0	0	310	278	588	0.492567	0.0231851	0.330389	222	549	771	0.0429764	0	0.0412568	0.123882	0.146991		1775	253	2028	0.0952193	0	0	1924	204	2128	0.344585	0.0203073	0.256366	906	230	1136	0.330685	0.00739112	0.248672	0.168346	0.11908
18S	787	C	232	820	1052	0.202026	0	0	264	643	907	0.0290994	0	0.0283068	233	704	937	0.105354	0	0	0.00943561	0.013344		2032	209	2241	0.143627	0	0	2368	795	3163	0.0485848	0	0	1372	673	2045	0.29704	0	0	0	0
18S	788	G	174	690	864	0.171407	0	0.14647	301	854	1155	0.022328	0	0	235	734	969	0.0434135	0	0.0416484	0.0627061	0.0616222		1468	720	2188	0.0156185	0	0	2543	734	3277	0.046546	0	0.0444888	1241	758	1999	0.227594	0	0	0.0148296	0.0209722
18S	789	G	485	625	1110	0.00881088	0	0	684	681	1365	0.0585733	0	0	557	511	1068	0.0488099	0	0.0465799	0.0155266	0.021958		2139	898	3037	0.282799	0	0	3700	1117	4817	0.261042	0	0	1583	677	2260	0.306025	0	0	0	0
18S	790	G	417	382	799	0.591181	0.0597754	0.371828	453	783	1236	0.1782	0	0.151351	522	413	935	0.358155	0	0.263915	0.262365	0.0900158		1625	672	2297	0.019442	0	0.0190794	3212	1035	4247	0.0857972	0	0	944	583	1527	0.114602	0	0.102879	0.0406527	0.0446846
18S	791	G	380	412	792	0.792252	0.191979	0.442354	351	310	661	1.56831	0.285668	0.610998	388	379	767	0.876765	0.181426	0.467493	0.506948	0.0742869		1403	233	1636	0.544696	0.0964359	0.352763	2100	284	2384	0.823792	0.163319	0.451796	570	179	749	1.48101	0.314474	0.597259	0.467272	0.100413
18S	792	C	910	402	1312	0.108471	0	0.0979236	858	685	1543	0.10544	0	0.0954391	916	551	1467	0.00820466	0	0	0.0644542	0.0455873		1988	300	2288	0.0646765	0	0.0607725	3002	1302	4304	0.0224003	0	0	913	454	1367	0.323286	0	0.244441	0.101738	0.103912
18S	793	C	1213	657	1870	0.248411	0	0	1317	777	2094	0.194855	0	0	1099	745	1844	0.225312	0	0	0	0		1869	627	2496	0.0697415	0	0	3419	1677	5096	0.201332	0	0	1003	695	1698	0.019227	0	0.0188752	0.00629173	0.00889785
18S	794	C	2155	542	2697	0.477387	0	0	2168	1653	3821	0.585386	0	0	1898	1188	3086	0.563258	0	0	0	0		3451	638	4089	0.472806	0	0	5230	1991	7221	0.461145	0	0	1746	1047	2793	0.435238	0	0	0	0
18S	795	G	1593	246	1839	0.196347	0	0	1617	871	2488	0.325477	0	0	1089	754	1843	0.220143	0	0	0	0		1588	519	2107	0.0606789	0	0.0572332	3768	950	4718	0.164383	0	0	1323	617	1940	0.197304	0	0	0.0190777	0.02698
18S	796	A	1639	247	1886	0.197686	0	0	1118	675	1793	0.0181159	0	0	904	734	1638	0.106793	0	0	0	0		1227	681	1908	0.145591	0	0.127146	3337	1094	4431	0.138149	0	0	1258	736	1994	0.258162	0	0	0.0423821	0.0599373
18S	797	A	1726	414	2140	0.301349	0	0	1211	1131	2342	0.285854	0	0	834	1074	1908	0.259019	0	0	0	0		1441	1684	3125	0.362856	0	0	3757	1083	4840	0.243953	0	0	1432	775	2207	0.362334	0	0	0	0
18S	798	G	962	350	1312	0.222104	0	0.181852	664	649	1313	0.366734	0	0.268478	674	563	1237	0.207692	0	0.172089	0.207473	0.0433209		797	861	1658	0.327507	0	0.24682	1695	660	2355	0.692973	0.0389082	0.409426	913	435	1348	0.12933	0	0.114595	0.256947	0.120577
18S	799	C	25	6	31	53.9465	0.949281	0.982359	35	8	43	43.0846	0.93231	0.97782	26	12	38	40.7917	0.931074	0.976671	0.97895	0.00245575	1	78	13	91	25.6954	0.887002	0.962932	79	18	97	43.3616	0.932654	0.977683	34	9	43	37.6997	0.927214	0.974732	0.971783	0.00637285	1
18S	800	G	2104	204	2308	0.352586	0	0	1609	510	2119	0.167385	0	0	1107	563	1670	0.13588	0	0	0	0		2575	364	2939	0.23777	0	0	3947	758	4705	0.15808	0	0	1291	251	1542	0.0308058	0	0.029904	0.00996799	0.0140969
18S	801	U	26	0	26	62.7383	0.95819	0.984883	7	36	43	44.3121	0.937035	0.978422	9	9	18	83.0643	0.969537	0.988723	0.984009	0.00425082	1	59	6	65	38.7912	0.931056	0.97524	75	10	85	52.4447	0.948962	0.981503	24	4	28	61.5433	0.954927	0.984554	0.980432	0.0038769	1
18S	802	U	1969	200	2169	0.316564	0	0	1606	555	2161	0.134012	0	0	1183	587	1770	0.180018	0	0	0	0		2569	174	2743	0.089885	0	0	2896	1357	4253	0.0447631	0	0.0428549	1107	449	1556	0.167709	0	0.143701	0.0621853	0.060237
18S	803	U	1358	155	1513	0.0178262	0	0.0175254	1207	524	1731	0.170862	0	0.146001	943	497	1440	0.060714	0	0.0572763	0.0736007	0.0537049		2203	38	2241	0.214342	0	0.176574	2473	2163	4636	0.0146431	0	0.0144348	917	546	1463	0.36571	0	0.267914	0.152974	0.104819
18S	804	A	1483	323	1806	0.193654	0	0	1496	443	1939	0.058173	0	0.0550017	879	985	1864	0.207918	0	0	0.0183339	0.0259281		2502	953	3455	0.232395	0	0	2848	2880	5728	0.157369	0	0	1211	931	2142	0.029538	0	0	0	0
18S	805	C	1740	298	2038	0.311258	0	0	1837	664	2501	0.173084	0	0	952	1254	2206	0.338106	0	0	0	0		3091	1085	4176	0.342101	0	0	3904	3722	7626	0.357843	0	0	1952	813	2765	0.200414	0	0	0	0
18S	806	U	1692	455	2147	0.344362	0	0	2250	1530	3780	0.465503	0	0	938	1306	2244	0.332769	0	0	0	0		3333	1030	4363	0.317	0	0	4406	3217	7623	0.322891	0	0	1974	1167	3141	0.237347	0	0	0	0
18S	807	U	1332	377	1709	0.219123	0	0	1927	1030	2957	0.306979	0	0	863	1106	1969	0.260062	0	0	0	0		2621	1037	3658	0.148896	0	0	3845	2866	6711	0.22964	0	0	1781	1295	3076	0.186444	0	0	0	0
18S	808	U	1256	280	1536	0.144661	0	0	2463	1015	3478	0.436664	0	0	1018	1072	2090	0.324954	0	0	0	0		2462	1047	3509	0.0675625	0	0	3695	3447	7142	0.279159	0	0	2024	1960	3984	0.371641	0	0	0	0
18S	809	G	781	152	933	0.304521	0.0456724	0.233627	1466	510	1976	0.012016	0	0	656	595	1251	0.0887646	0	0.0815877	0.105071	0.0968124		1454	1247	2701	0.217057	0	0.1784	2698	2638	5336	0.0506131	0	0	1497	1586	3083	0.166865	0	0	0.0594668	0.0840987
18S	810	A	573	139	712	0.558766	0.0934759	0.35879	1018	386	1404	0.304705	0	0.233671	576	252	828	0.536724	0.0995709	0.34954	0.314	0.0569266		1201	915	2116	0.52651	0.0582918	0.345018	2250	2391	4641	0.0233735	0	0.0228445	1196	1508	2704	0.0697638	0	0	0.122621	0.157535
18S	811	A	479	150	629	0.56933	0.049457	0.363153	706	521	1227	0.368856	0	0.269624	668	268	936	0.202846	0	0.168788	0.267188	0.0793677		1202	1958	3160	0.0658687	0	0	2008	1873	3881	0.133173	0	0.117549	1080	1618	2698	0.11785	0	0	0.039183	0.0554131
18S	812	A	509	272	781	0.103353	0	0.0937806	593	534	1127	0.358954	0	0.264312	532	188	720	0.442364	0	0.306989	0.221694	0.0921111		1212	2699	3911	0.296558	0	0	1633	1559	3192	0.291683	0	0.225871	1101	1254	2355	0.0306169	0	0	0.0752904	0.106477
18S	813	A	403	307	710	0.124551	0	0.110895	514	314	828	0.652969	0	0.395316	489	201	690	0.389307	0	0.280509	0.26224	0.116831		997	2393	3390	0.194728	0	0	1317	1342	2659	0.474131	0.010358	0.321716	947	1018	1965	0.120092	0	0.107265	0.142994	0.133748
18S	814	A	287	203	490	0.684816	0	0.406955	344	229	573	1.3006	0.11238	0.565759	256	193	449	1.15763	0.107502	0.537082	0.503265	0.0691006		800	2163	2963	0.0316689	0	0	1130	1458	2588	0.493348	0	0.330449	723	786	1509	0.454408	0.02839	0.312577	0.214342	0.151738
18S	815	A	272	137	409	1.00423	0.143904	0.501665	414	174	588	1.05659	0.15524	0.514183	301	140	441	1.10402	0.172396	0.525285	0.513711	0.0096484		838	1041	1879	0.554196	0	0.356703	822	1414	2236	0.682109	0.0706527	0.405616	598	604	1202	0.697469	0.0865126	0.411089	0.391136	0.0244503
18S	816	U	207	181	388	1.39649	0.229267	0.583348	232	255	487	1.73657	0.292895	0.635054	257	159	416	1.39225	0.286808	0.582567	0.600323	0.0245606		530	289	819	2.7994	0.440948	0.737037	628	978	1606	1.38962	0.27293	0.581675	412	413	825	1.45857	0.270049	0.593552	0.637421	0.0706058
18S	817	U	375	173	548	0.768185	0.0685196	0.434896	819	245	1064	0.222024	0	0.181825	676	169	845	0.180956	0	0.153382	0.256701	0.126537		1031	582	1613	0.875389	0.0505726	0.466932	1325	987	2312	0.618744	0.0494674	0.382339	740	592	1332	0.415946	0	0.293914	0.381062	0.0706399
18S	818	A	600	375	975	0.0106557	0	0.0105541	1182	465	1647	0.218271	0	0	929	385	1314	0.245323	0	0	0.00351803	0.00497525		1591	1607	3198	0.136445	0	0	1874	3441	5315	0.365438	0	0	1303	860	2163	0.208641	0	0	0	0
18S	819	G	654	754	1408	0.235092	0	0	1135	457	1592	0.142722	0	0	1112	355	1467	0.270042	0	0	0	0		1743	2131	3874	0.31795	0	0	2086	3545	5631	0.389149	0	0	1361	1231	2592	0.35565	0	0	0	0
18S	820	A	851	1089	1940	0.401002	0	0	1332	986	2318	0.373902	0	0	864	1088	1952	0.414075	0	0	0	0		1696	4421	6117	0.617947	0	0	1906	5093	6999	0.507057	0	0	1295	2104	3399	0.510889	0	0	0	0
18S	821	G	473	503	976	0.42088	0	0.296424	567	866	1433	0.154533	0	0.13393	486	537	1023	0.297081	0	0.229211	0.219855	0.0666673		1078	1126	2204	0.2155	0	0.17736	1196	2950	4146	0.0790424	0	0	615	480	1095	0.816079	0	0.449589	0.208983	0.184901
18S	822	U	822	1553	2375	0.443303	0	0	1215	2214	3429	0.567052	0	0	640	1182	1822	0.2877	0	0	0	0		1962	1811	3773	0.356515	0	0	1567	2411	3978	0.0289045	0	0	981	1275	2256	0.16387	0	0	0	0
18S	823	G	270	524	794	1.00555	0.0901302	0.501698	337	394	731	1.53298	0.188346	0.605535	220	625	845	0.734174	0.0840485	0.423645	0.510293	0.0745046		536	800	1336	1.03142	0.102566	0.507921	551	1472	2023	1.07246	0.167915	0.517605	470	313	783	1.76787	0.280206	0.639006	0.554844	0.0596428
18S	824	U	340	482	822	1.0297	0.162228	0.507621	387	589	976	0.866007	0.0378154	0.464351	335	540	875	0.672996	0.0592496	0.402545	0.458172	0.043119		623	80	703	2.8545	0.444093	0.740836	575	538	1113	2.78738	0.451452	0.73614	508	249	757	1.89566	0.311023	0.654954	0.710643	0.0394248
18S	825	U	457	1962	2419	0.35702	0	0	699	641	1340	0.388301	0	0.279845	462	1254	1716	0.205086	0	0	0.0932817	0.13192		1114	1303	2417	0.00692951	0	0	956	2702	3658	0.046977	0	0.0448809	1089	1082	2171	0.0396204	0	0	0.0149603	0.0211571
18S	826	C	727	1660	2387	0.326763	0	0	1166	1957	3123	0.449648	0	0	925	1481	2406	0.464816	0	0	0	0		1778	606	2384	0.0225996	0	0	1413	3995	5408	0.327645	0	0	2071	1361	3432	0.415904	0	0	0	0
18S	827	A	403	1205	1608	0.0656792	0	0.0616672	570	1055	1625	0.201312	0	0.167663	451	814	1265	0.0802879	0	0.0743752	0.101235	0.0472571		816	645	1461	0.60548	0.0341055	0.377294	844	2857	3701	0.0167207	0	0.0164501	1352	1186	2538	0.189055	0	0	0.131248	0.17411
18S	828	A	223	1251	1474	0.179322	0	0.152143	512	860	1372	0.455701	0	0.313203	293	989	1282	0.0442453	0	0.0424022	0.169249	0.111214		477	1474	1951	0.210263	0	0.173807	619	3279	3898	0.0413696	0	0	1213	578	1791	0.228243	0	0.185913	0.119907	0.0849308
18S	829	A	201	1343	1544	0.0924919	0	0.0847116	668	991	1659	0.153514	0	0.133153	293	1015	1308	0.0259061	0	0	0.0726217	0.0550277		644	2094	2738	0.168922	0	0	792	4181	4973	0.260763	0	0	1497	1452	2949	0.2951	0	0	0	0
18S	830	G	143	1478	1621	0.060111	0	0.0567355	373	882	1255	0.627964	0.000267469	0.385924	207	590	797	0.646965	0.077322	0.393122	0.278594	0.156905		445	1501	1946	0.285014	0	0.221887	538	1281	1819	1.3129	0.248214	0.567777	843	610	1453	0.621366	0.0497753	0.383399	0.391021	0.141312
18S	831	C	174	1707	1881	0.0797024	0	0	398	2766	3164	0.387811	0	0	244	950	1194	0.0526267	0	0.0500354	0.0166785	0.0235869		499	1870	2369	0.107843	0	0.0973824	493	3519	4012	0.0481657	0	0.0459633	1233	1389	2622	0.0809379	0	0	0.0477819	0.039777
18S	832	A	153	1877	2030	0.206838	0	0	455	2102	2557	0.214656	0	0	296	1305	1601	0.29724	0	0	0	0		436	2843	3279	0.223333	0	0	487	5121	5608	0.287797	0	0	1081	1967	3048	0.218993	0	0	0	0
18S	833	G	92	1983	2075	0.279849	0	0	229	2886	3115	0.413457	0	0	120	1000	1120	0.0470215	0	0	0	0		271	3920	4191	0.406348	0	0	353	4442	4795	0.180824	0	0	519	1100	1619	0.549067	0.056924	0.354592	0.118197	0.167156
18S	834	G	86	998	1084	0.397952	0	0.284856	221	1092	1313	0.506021	0	0.336168	108	776	884	0.163905	0	0.14096	0.253995	0.0826272		152	2524	2676	0.00264392	0	0.00263793	299	2764	3063	0.300907	0	0.231363	315	1384	1699	0.445856	0	0.308494	0.180832	0.129877
18S	835	C	153	1301	1454	0.048866	0	0	397	1375	1772	0.0575735	0	0.0544683	188	824	1012	0.0578589	0	0	0.0181561	0.0256766		313	2252	2565	0.0321166	0	0.0311289	545	3811	4356	0.157932	0	0	677	1555	2232	0.0914664	0	0.0838358	0.0383216	0.0346016
18S	836	C	185	1369	1554	0.181886	0	0	487	1077	1564	0.182513	0	0.154427	279	596	875	0.0486301	0	0.0464255	0.0669508	0.0646936		462	2118	2580	0.0199966	0	0	679	3810	4489	0.230275	0	0	1049	1640	2689	0.106394	0	0	0	0
18S	837	C	347	1467	1814	0.38502	0	0	759	1866	2625	0.376974	0	0	359	792	1151	0.260706	0	0	0	0		733	2174	2907	0.185859	0	0	898	4409	5307	0.399535	0	0	1744	2628	4372	0.499024	0	0	0	0
18S	838	G	217	451	668	0.650473	0.139062	0.39447	468	671	1139	0.431189	0.0150759	0.301465	222	334	556	0.554119	0.124925	0.356961	0.350966	0.0382052		447	1496	1943	0.198691	0	0.165828	608	1992	2600	0.234162	0	0.189793	1031	1373	2404	0.0254054	0	0	0.11854	0.0843896
18S	839	A	109	593	702	0.368374	0.00894775	0.269486	318	791	1109	0.368719	0	0.269567	146	536	682	0.163446	0	0.140661	0.226571	0.0607477		293	2414	2707	0.249536	0	0	275	2037	2312	0.256694	0	0.204332	852	1621	2473	0.0889024	0	0	0.0681106	0.0963229
18S	840	G	109	380	489	0.820204	0.0946527	0.451117	479	624	1103	0.288969	0	0.224344	149	337	486	0.67164	0.139068	0.402279	0.359247	0.097452		334	1532	1866	0.0224365	0	0.0219556	370	1146	1516	0.824537	0.128615	0.452079	884	425	1309	0.849364	0.11763	0.459463	0.311166	0.204525
18S	841	C	246	361	607	0.420523	0	0.296377	505	758	1263	0.118363	0	0.105911	239	391	630	0.262951	0	0.208465	0.203584	0.0778339		457	1134	1591	0.149386	0	0.130041	470	1303	1773	0.466097	0	0.318039	1194	979	2173	0.0695441	0	0.0650502	0.171043	0.107275
18S	842	C	262	353	615	0.33557	0	0.251562	709	927	1636	0.182448	0	0	167	641	808	0.0576432	0	0	0.0838539	0.118587		373	942	1315	0.342021	0.0258039	0.255	446	2120	2566	0.0825347	0	0	1579	1224	2803	0.213909	0	0	0.0849999	0.120208
18S	843	G	193	229	422	0.899947	0.0506832	0.47426	303	346	649	1.20634	0.234164	0.547143	90	584	674	0.142222	0	0.124675	0.382026	0.184391		218	600	818	1.19041	0.242592	0.543767	271	559	830	1.8919	0.344402	0.654479	560	436	996	1.34741	0.263494	0.574244	0.59083	0.0466946
18S	844	C	229	216	445	0.75299	0.160387	0.430096	367	656	1023	0.33163	0.0355237	0.249223	118	580	698	0.0887935	0	0.0816595	0.25366	0.142283		284	885	1169	0.556572	0.0147439	0.357759	480	1191	1671	0.301814	0.0321477	0.231948	993	756	1749	0.225949	0	0.184391	0.258033	0.0731409
18S	845	C	407	212	619	0.278799	0	0.218292	741	678	1419	0.0650156	0	0	206	718	924	0.203568	0	0	0.0727639	0.102904		597	478	1075	0.785987	0.111068	0.440315	949	1354	2303	0.106525	0	0	1494	791	2285	0.109638	0	0	0.146772	0.207566
18S	846	U	509	652	1161	0.341958	0	0	1175	680	1855	0.303532	0	0	246	981	1227	0.427968	0	0	0	0		782	847	1629	0.180484	0	0.152969	982	1855	2837	0.307501	0	0	1708	1296	3004	0.368967	0	0	0.0509898	0.0721104
18S	847	G	788	610	1398	0.440807	0	0	1278	511	1789	0.256716	0	0	304	548	852	0.101303	0	0	0	0		1278	764	2042	0.0153206	0	0	1426	917	2343	0.129826	0	0	1761	578	2339	0.150019	0	0	0	0
18S	848	G	681	288	969	0.124467	0	0	956	368	1324	0.031631	0	0.0306836	255	366	621	0.265416	0	0.210013	0.0802322	0.0926199		1142	778	1920	0.141263	0	0.123834	1147	1620	2767	0.305238	0	0	1345	544	1889	0.0246326	0	0.0240528	0.0492958	0.0536137
18S	849	A	438	325	763	0.182519	0	0.154519	816	464	1280	0.0705265	0	0.0659283	192	407	599	0.334593	0	0.251021	0.157156	0.0755869		1061	1662	2723	0.114941	0	0	890	1309	2199	0.115753	0	0	1295	524	1819	0.0155495	0	0.0153197	0.00510655	0.00722175
18S	850	U	572	529	1101	0.192236	0	0	896	924	1820	0.26087	0	0	277	531	808	0.0330724	0	0	0	0		1826	2280	4106	0.393342	0	0	1119	1456	2575	0.257177	0	0	1638	696	2334	0.246757	0	0	0	0
18S	851	A	253	450	703	0.350821	0.0363119	0.259983	422	401	823	0.740251	0.158126	0.425667	163	241	404	1.02955	0.214565	0.507897	0.397849	0.103104		1067	1673	2740	0.0224492	0	0.0219642	468	526	994	1.04671	0.259022	0.511663	707	462	1169	0.522051	0.076656	0.343185	0.29227	0.203134
18S	852	C	154	653	807	0.202296	0	0.168432	399	679	1078	0.312728	0	0.238396	153	521	674	0.198206	0	0.165624	0.190817	0.0336628		976	1529	2505	0.189691	0	0.159499	485	712	1197	0.670506	0.0986761	0.40158	599	704	1303	0.277309	0	0.217235	0.259438	0.103236
18S	853	C	309	645	954	0.0242816	0	0.0237302	662	923	1585	0.132899	0	0	353	663	1016	0.217218	0	0	0.00791007	0.0111865		1935	727	2662	0.170514	0	0.145721	792	957	1749	0.136032	0	0.119803	861	1085	1946	0.212909	0	0	0.088508	0.0634728
18S	854	G	343	398	741	0.4174	0.0502825	0.294763	364	624	988	0.568846	0.0328549	0.362823	226	477	703	0.267077	0	0.211019	0.289535	0.062084		1737	1116	2853	0.146543	0	0.127852	588	233	821	1.72252	0.307519	0.632976	427	356	783	1.20594	0.182518	0.546994	0.435941	0.220662
18S	855	C	614	512	1126	0.0242433	0	0	759	957	1716	0.0663949	0	0	571	593	1164	0.198617	0	0	0	0		3485	1743	5228	0.404511	0	0	1384	976	2360	0.0517671	0	0	909	733	1642	0.0731048	0	0.0681632	0.0227211	0.0321324
18S	856	A	573	338	911	0.335989	0.0235892	0.251698	555	961	1516	0.1562	0	0.135175	472	359	831	0.296274	0	0.22877	0.205214	0.0504021		2331	1074	3405	0.0331931	0	0	1023	946	1969	0.252453	0	0.201649	626	674	1300	0.478265	0	0.323699	0.175116	0.133475
18S	857	G	563	255	818	0.609144	0.157204	0.378839	538	232	770	1.58585	0.339173	0.613587	365	207	572	1.11092	0.253455	0.526708	0.506378	0.0969078		1188	1394	2582	0.271188	0	0.213399	1047	546	1593	0.718876	0.151688	0.418377	380	307	687	2.13693	0.403124	0.681533	0.43777	0.191606
18S	858	C	1112	252	1364	0.0169231	0	0	1260	652	1912	0.0689435	0	0.0645284	811	380	1191	0.0303039	0	0.0294365	0.0313216	0.0263773		2240	722	2962	0.0608017	0	0.057335	1715	1206	2921	0.0388813	0	0	804	681	1485	0.491364	0.0398648	0.329622	0.128986	0.143789
18S	859	U	1057	514	1571	0.118172	0	0	1657	497	2154	0.0178654	0	0.0175599	903	544	1447	0.108326	0	0	0.00585329	0.0082778		2763	923	3686	0.203683	0	0	2383	1563	3946	0.275788	0	0	1164	1460	2624	0.142366	0	0	0	0
18S	860	A	1698	308	2006	0.305138	0	0	2629	792	3421	0.360377	0	0	1157	376	1533	0.126061	0	0	0	0		3535	908	4443	0.394834	0	0	2975	1398	4373	0.334728	0	0	1561	2153	3714	0.389783	0	0	0	0
18S	861	G	1885	249	2134	0.303742	0	0	2622	446	3068	0.21664	0	0	1600	277	1877	0.268258	0	0	0	0		2483	867	3350	0.205103	0	0	3509	1134	4643	0.355764	0	0	1456	2509	3965	0.396943	0	0	0	0
18S	862	G	1519	234	1753	0.116293	0	0	2246	345	2591	0.0379415	0	0	1391	547	1938	0.292591	0	0	0	0		1316	554	1870	0.319342	0	0.242145	2469	1034	3503	0.125409	0	0	1100	1929	3029	0.157774	0	0	0.0807148	0.114148
18S	863	A	1571	235	1806	0.174211	0	0	2795	457	3252	0.276118	0	0	1435	409	1844	0.276218	0	0	0	0		1673	552	2225	0.0459519	0	0	3362	914	4276	0.345808	0	0	1511	2232	3743	0.361515	0	0	0	0
18S	864	A	1161	120	1281	0.182137	0	0.154176	1762	746	2508	0.024339	0	0	942	184	1126	0.242009	0	0.194992	0.11639	0.0839698		717	473	1190	0.703331	0.039059	0.413119	2013	341	2354	0.231427	0	0.187999	1042	746	1788	0.46912	0	0.319442	0.306853	0.0923348
18S	865	U	1063	70	1133	0.308368	0	0.235848	1898	686	2584	0.0843327	0	0	1338	176	1514	0.135072	0	0	0.0786159	0.11118		542	413	955	0.938017	0.0433114	0.48427	1753	264	2017	0.373445	0.000719568	0.272002	809	1428	2237	0.142856	0	0.125048	0.293773	0.147458
18S	866	A	1102	243	1345	0.0254499	0	0.0248363	1550	1064	2614	0.133151	0	0	1118	193	1311	0.0445207	0	0	0.00827876	0.0117079		470	754	1224	0.326667	0	0.246383	1583	520	2103	0.204663	0	0.169959	1000	1635	2635	0.0919702	0	0	0.138781	0.102973
18S	867	A	2146	200	2346	0.495602	0	0	2216	846	3062	0.323666	0	0	1353	137	1490	0.230636	0	0	0	0		1559	726	2285	0.420249	0	0	2199	344	2543	0.106726	0	0	1136	1256	2392	0.0295445	0	0	0	0
18S	868	U	1151	108	1259	0.0467372	0	0	1111	413	1524	0.358106	0.0357276	0.263808	793	105	898	0.219651	0	0.180258	0.148022	0.110085		277	317	594	1.34456	0.191843	0.573891	1340	351	1691	0.255766	0	0.203769	991	1066	2057	0.104357	0	0.0945373	0.290733	0.205129
18S	869	G	73	9	82	14.2233	0.840862	0.935051	85	60	145	13.3733	0.841285	0.93087	37	9	46	22.0913	0.895694	0.957576	0.941166	0.0117286	1	21	43	64	21.2145	0.879786	0.955646	50	20	70	29.5521	0.916905	0.967715	33	62	95	25.0373	0.909021	0.961978	0.96178	0.00492911	1
18S	870	G	539	181	720	0.540114	0	0.351014	966	636	1602	0.0989741	0	0.0901116	574	266	840	0.070181	0	0.0656516	0.168926	0.129142		481	558	1039	0.261314	0	0.207334	1354	424	1778	0.0371682	0	0.0358557	1139	998	2137	0.0433479	0	0.0415655	0.0949184	0.0795241
18S	871	A	1029	170	1199	0.158361	0	0	1155	560	1715	0.0422753	0	0	976	193	1169	0.306781	0	0	0	0		1032	367	1399	0.0663968	0	0	1655	792	2447	0.299514	0	0	1147	1518	2665	0.166308	0	0	0	0
18S	872	A	607	201	808	0.275415	0	0.216151	1043	726	1769	0.147476	0	0	537	257	794	0.0253669	0	0	0.0720504	0.101895		1179	488	1667	0.22041	0	0	1249	727	1976	0.12927	0	0	1200	644	1844	0.248973	0	0.199429	0.0664763	0.0940117
18S	873	U	568	712	1280	0.257733	0	0	848	1405	2253	0.40597	0	0	616	269	885	0.213695	0	0	0	0		1295	838	2133	0.418796	0	0	1329	972	2301	0.277826	0	0	1517	1621	3138	0.324459	0	0	0	0
18S	874	A	314	603	917	0.0159041	0	0	505	691	1196	0.08771	0	0.0806993	373	208	581	0.136579	0	0.120349	0.067016	0.0500757		733	722	1455	0.149038	0	0	725	691	1416	0.171834	0	0.146725	1131	1983	3114	0.342729	0	0	0.0489084	0.0691669
18S	875	G	482	638	1120	0.230132	0	0	620	803	1423	0.150031	0	0	448	188	636	0.0194139	0	0	0	0		1048	680	1728	0.30766	0	0	855	881	1736	0.0826585	0	0	1257	1910	3167	0.373011	0	0	0	0
18S	876	G	421	313	734	0.289917	0.0214616	0.224994	302	588	890	0.437785	0.0706373	0.304724	380	172	552	0.207816	0	0.172317	0.234012	0.0544295		852	517	1369	0.0874534	0	0	665	1360	2025	0.193249	0	0	717	1706	2423	0.135928	0	0	0	0
18S	877	A	311	381	692	0.364855	0.0586781	0.267604	382	704	1086	0.0837167	0	0.0773152	290	255	545	0.173504	0	0.148083	0.164334	0.0785305		725	454	1179	0.0244727	0	0.0239079	503	637	1140	0.492151	0.0814269	0.33002	621	1224	1845	0.0953654	0	0.0871057	0.147011	0.131954
18S	878	C	240	706	946	0.0439751	0	0	249	442	691	0.689274	0.119688	0.408379	219	170	389	0.635299	0.119554	0.389101	0.265827	0.188133		463	376	839	0.443003	0.0566889	0.307254	569	539	1108	0.521331	0.0747915	0.342884	414	778	1192	0.632588	0.119072	0.387675	0.345938	0.0329025
18S	879	C	426	645	1071	0.142289	0	0	365	709	1074	0.0218088	0	0.0213628	267	167	434	0.507612	0.0639996	0.337213	0.119525	0.154176		491	346	837	0.490308	0	0.329261	596	1316	1912	0.13011	0	0	539	896	1435	0.279635	0	0.218646	0.182636	0.136811
18S	880	G	450	217	667	0.489904	0.0814429	0.329146	293	308	601	0.931783	0.181649	0.482759	288	199	487	0.430897	0.048184	0.30157	0.371158	0.0797125		460	208	668	0.945757	0.100689	0.486435	621	125	746	1.59384	0.301786	0.614789	362	413	775	1.35583	0.268577	0.575836	0.55902	0.0537325
18S	881	C	499	435	934	0.165466	0	0.142105	339	618	957	0.329807	0	0.248206	277	333	610	0.334152	0	0.250768	0.213693	0.0506312		385	282	667	1.19135	0.149029	0.544032	633	819	1452	0.566315	0	0.361718	589	916	1505	0.162653	0	0.139978	0.348576	0.165216
18S	882	G	669	295	964	0.286586	0	0.222929	709	468	1177	0.26511	0	0.209696	601	417	1018	0.0990732	0	0	0.144208	0.102114		708	295	1003	0.631972	0.038264	0.387481	1390	709	2099	0.263714	0	0.208761	921	863	1784	0.00497355	0	0	0.198747	0.158347
18S	883	G	549	195	744	1.09693	0.132864	0.523447	525	385	910	1.0725	0.119287	0.517764	349	213	562	1.08922	0.136656	0.521797	0.521003	0.00238689		488	301	789	1.59823	0.281957	0.615422	1203	542	1745	0.885071	0.079973	0.469659	681	443	1124	0.761304	0.125583	0.432457	0.505846	0.0789565
18S	884	U	816	258	1074	0.763152	0.0745738	0.433063	615	710	1325	0.789827	0.0391177	0.441473	504	367	871	0.608448	0.0380947	0.378553	0.417696	0.0278907		696	959	1655	0.435917	0.0423443	0.303708	1692	714	2406	0.618986	0.0693522	0.382428	880	553	1433	0.50623	0.0795395	0.336246	0.340794	0.0322975
18S	885	U	963	421	1384	0.59152	0.0753917	0.371839	913	728	1641	0.79146	0.101237	0.441946	651	488	1139	0.461442	0.0420255	0.315934	0.376573	0.0515531		1025	1916	2941	0.104993	0	0	2227	976	3203	0.408767	0.052506	0.290224	1254	507	1761	0.344173	0.0638237	0.256156	0.182127	0.129532
18S	886	C	1105	593	1698	0.48607	0.0808136	0.327214	1190	1133	2323	0.491648	0.0589594	0.329695	916	540	1456	0.326638	0.0414738	0.246342	0.301084	0.0387215		936	1713	2649	0.13779	0	0.121144	3010	1186	4196	0.190896	0	0.160328	1532	943	2475	0.00979178	0	0.00970071	0.0970574	0.0638083
18S	887	U	2117	774	2891	0.0341286	0	0	2434	1030	3464	0.155155	0	0.134349	1623	810	2433	0.147243	0	0	0.0447829	0.0633326		1181	2573	3754	0.151984	0	0	4855	2916	7771	0.308453	0	0	2237	1245	3482	0.243114	0	0	0	0
18S	888	A	2561	616	3177	0.0174428	0	0	3727	966	4693	0.0442977	0	0	2008	485	2493	0.0622026	0	0	0	0		1329	2836	4165	0.173185	0	0	6045	1310	7355	0.179466	0	0	2388	1269	3657	0.225718	0	0	0	0
18S	889	U	3393	1490	4883	0.350303	0	0	4850	858	5708	0.163062	0	0	2192	910	3102	0.221943	0	0	0	0		1501	4699	6200	0.45529	0	0	7476	1602	9078	0.332316	0	0	3023	565	3588	0.178725	0	0	0	0
18S	890	U	3625	1834	5459	0.399481	0	0	5538	2447	7985	0.391004	0	0	2337	1363	3700	0.329761	0	0	0	0		1684	3943	5627	0.375213	0	0	7317	1188	8505	0.254431	0	0	3228	793	4021	0.248914	0	0	0	0
18S	891	U	3439	941	4380	0.202374	0	0	5281	2380	7661	0.32814	0	0	2088	1565	3653	0.303731	0	0	0	0		1710	2609	4319	0.169388	0	0	6328	1686	8014	0.187615	0	0	2710	771	3481	0.102151	0	0	0	0
18S	892	U	2633	1555	4188	0.157012	0	0	5290	1690	6980	0.237411	0	0	1993	1512	3505	0.272558	0	0	0	0		1714	1559	3273	0.0832417	0	0.0768667	5605	559	6164	0.078733	0	0.0729975	2552	362	2914	0.0871164	0	0.0801606	0.0766749	0.00292747
18S	893	G	2856	1632	4488	0.241239	0	0	4574	2554	7128	0.267399	0	0	1509	1050	2559	0.00201823	0	0.00201495	0.00067165	0.000949856		1444	1173	2617	0.297271	0	0.229219	4746	4285	9031	0.332568	0	0	1906	1320	3226	0.0634576	0	0	0.0764062	0.108055
18S	894	U	2045	1881	3926	0.172354	0	0	3913	2587	6500	0.224868	0	0	1625	1549	3174	0.270047	0	0	0	0		1551	2022	3573	0.163813	0	0	4238	2854	7092	0.191951	0	0	2294	1360	3654	0.226706	0	0	0	0
18S	895	U	452	1904	2356	0.339938	0.0670389	0.253777	1172	1973	3145	0.595617	0.138535	0.373358	511	1057	1568	0.460952	0.0964027	0.315652	0.314262	0.0488284		1364	983	2347	0.206076	0	0.170925	1230	887	2117	1.71607	0.376608	0.631931	1523	793	2316	0.208565	0.0211639	0.172634	0.325164	0.216919
18S	896	G	493	1483	1976	0.438498	0.0522473	0.304938	1081	2326	3407	0.326148	0	0.245991	509	1228	1737	0.166341	0	0.142688	0.231205	0.0670582		1318	626	1944	0.282159	0	0.220154	1054	3086	4140	0.192444	0	0.161419	1162	1591	2753	0.0630558	0	0	0.127191	0.0930792
18S	897	G	1061	1155	2216	0.104095	0	0.0943191	1932	1997	3929	0.00821035	0	0	451	1087	1538	0.163613	0	0.140686	0.0783351	0.0585364		576	949	1525	0.45865	0.061715	0.314576	1955	3131	5086	0.159465	0	0	768	1503	2271	0.0728629	0	0.0679423	0.127506	0.135155
18S	898	U	1109	1184	2293	0.0726581	0	0	1964	1493	3457	0.0173061	0	0	460	1017	1477	0.0460307	0	0.0440336	0.0146779	0.0207576		494	1682	2176	0.125055	0	0	1804	2091	3895	0.00367614	0	0	697	1298	1995	0.142084	0	0.124462	0.0414875	0.0586721
18S	899	U	915	734	1649	0.146505	0	0.127852	1668	949	2617	0.139526	0	0.122483	428	579	1007	0.355908	0.00762619	0.262679	0.171005	0.0648608		393	739	1132	0.635824	0.124054	0.388897	1531	879	2410	0.500171	0	0.333501	538	968	1506	0.436201	0.0492373	0.303859	0.342086	0.0352433
18S	900	U	781	499	1280	0.2656	0	0.20999	1489	709	2198	0.150851	0	0.13113	398	634	1032	0.147284	0	0.128485	0.156535	0.0378141		455	764	1219	0.416612	0.0272051	0.294261	1462	1383	2845	0.0557586	0	0.0528313	611	1566	2177	0.128711	0	0	0.115697	0.128092
18S	901	U	628	551	1179	0.166412	0	0.142774	1136	470	1606	0.354657	0.0282755	0.261926	361	409	770	0.33365	0.035257	0.250422	0.218374	0.0536631		374	1327	1701	0.107148	0	0	1262	1007	2269	0.1728	0	0.147395	581	1235	1816	0.0380848	0	0	0.0491316	0.0694826
18S	902	C	712	518	1230	0.00527123	0	0	984	732	1716	0.130285	0	0.115327	386	435	821	0.148216	0	0.12922	0.0815158	0.0579188		449	1191	1640	0.116541	0	0	1350	1569	2919	0.167519	0	0	539	1471	2010	0.191535	0	0	0	0
18S	903	G	805	345	1150	0.0474949	0	0	1360	441	1801	0.0601492	0	0	670	249	919	0.0943237	0	0	0	0		836	783	1619	0.154671	0	0	1359	736	2095	0.0730704	0	0.068125	1031	673	1704	0.108961	0	0	0.0227083	0.0321144
18S	904	G	510	345	855	0.174961	0	0.149056	803	366	1169	0.314112	0.0199979	0.239185	487	237	724	0.111709	0	0.100609	0.16295	0.0574204		526	603	1129	0.23884	0	0.192931	795	944	1739	0.154974	0	0.134247	651	565	1216	0.211622	0.021044	0.174779	0.167319	0.0245315
18S	905	A	305	208	513	0.815672	0.193312	0.449722	521	435	956	0.430396	0.080235	0.301113	331	269	600	0.282714	0.0197171	0.220689	0.323841	0.0948733		435	765	1200	0.0967157	0	0.0882537	567	981	1548	0.182921	0.00872915	0.154719	298	623	921	0.55323	0.128816	0.356429	0.199801	0.114029
18S	906	A	173	276	449	0.913086	0.197625	0.47784	411	371	782	0.583042	0.105817	0.368602	253	219	472	0.601433	0.118807	0.376056	0.407499	0.0498311		335	1059	1394	0.102851	0	0	421	812	1233	0.420908	0.0864233	0.296394	316	516	832	0.655462	0.137812	0.396226	0.230873	0.168263
18S	907	C	257	318	575	0.447994	0.0227372	0.309761	345	629	974	0.177242	0	0.150688	226	358	584	0.287179	0	0.223404	0.227951	0.0650205		317	893	1210	0.0170107	0	0.0167398	406	993	1399	0.170548	0	0.145788	326	740	1066	0.196501	0	0.164359	0.108962	0.0656502
18S	908	U	156	743	899	0.0624074	0	0	481	617	1098	0.0543221	0	0.0515678	292	557	849	0.0877124	0	0	0.0171893	0.0243093		286	970	1256	0.0691594	0	0	414	910	1324	0.282927	0	0.220662	374	1127	1501	0.198017	0	0	0.073554	0.104021
18S	909	G	111	463	574	0.586184	0.0299123	0.369962	250	645	895	0.400955	0	0.286429	159	302	461	0.910847	0.175359	0.477212	0.377868	0.0780872		216	553	769	0.534632	0.115074	0.348673	303	771	1074	0.681054	0.080475	0.40536	216	852	1068	0.162145	0	0.139635	0.297889	0.114271
18S	910	A	71	849	920	0.0912535	0	0.0837059	199	1034	1233	0.121898	0	0.108732	139	947	1086	0.114239	0	0	0.064146	0.0464945		243	1258	1501	0.252049	0	0	197	1418	1615	0.260967	0	0.207059	216	1098	1314	0.0203549	0	0	0.0690198	0.0976087
18S	911	G	83	835	918	0.206916	0	0.171596	165	822	987	0.55713	0.000625968	0.358026	135	682	817	0.349878	0	0.259427	0.263016	0.0761517		309	756	1065	0.112695	0	0.101367	276	1224	1500	0.56053	0.0253739	0.359345	210	1117	1327	0.0396001	0	0.0381192	0.166277	0.13894
18S	912	G	75	505	580	1.2366	0.232768	0.553319	74	527	601	1.96617	0.37565	0.663236	85	518	603	1.06691	0.162965	0.516599	0.577718	0.0623009		233	407	640	0.970151	0.195601	0.492815	184	1166	1350	1.03257	0.207328	0.508197	142	760	902	0.750929	0.139264	0.429146	0.476719	0.0342204
18S	913	C	113	1143	1256	0.114744	0	0.103007	187	1231	1418	0.334077	0.0162626	0.250551	129	1050	1179	0.104783	0	0.094918	0.149492	0.0715356		338	566	904	0.402014	0.0254134	0.286966	260	1595	1855	0.642613	0.150814	0.391342	197	917	1114	0.507125	0.0998392	0.336685	0.338331	0.0426271
18S	914	C	178	1815	1993	0.287362	0	0	294	2014	2308	0.149646	0	0	238	1344	1582	0.161304	0	0	0	0		660	446	1106	0.112486	0	0.101195	409	3238	3647	0.136477	0	0	231	1349	1580	0.0722047	0	0.067382	0.0561922	0.0420634
18S	915	A	140	1243	1383	0.197624	0	0.165113	259	2616	2875	0.274146	0	0	162	1422	1584	0.123274	0	0	0.0550376	0.0778349		575	567	1142	0.106882	0	0.0966381	297	3662	3959	0.108134	0	0	154	1570	1724	0.0319549	0	0.0309828	0.0425403	0.0402899
18S	916	U	159	2789	2948	0.424287	0	0	311	3849	4160	0.456474	0	0	323	2779	3102	0.585695	0	0	0	0		870	1431	2301	0.45181	0	0	464	5850	6314	0.408887	0	0	267	2533	2800	0.353148	0	0	0	0
18S	917	G	130	1565	1695	0.173958	0	0.148255	200	1918	2118	0.275932	0	0.216339	161	1553	1714	0.162332	0	0	0.121532	0.090319		480	853	1333	0.0650175	0	0.0610913	365	4518	4883	0.153915	0	0	178	2180	2358	0.179191	0	0	0.0203638	0.0287987
18S	918	A	128	1963	2091	0.00738262	0	0	171	2883	3054	0.0487434	0	0	173	1453	1626	0.109185	0	0	0	0		540	1060	1600	0.0851412	0	0	521	5190	5711	0.236527	0	0	193	2728	2921	0.329135	0	0	0	0
18S	919	U	146	2242	2388	0.0943398	0	0	153	2331	2484	0.310427	0	0.236963	134	1322	1456	0.00825135	0	0	0.0789876	0.111705		369	1324	1693	0.0928571	0	0	312	3859	4171	0.125216	0	0.111305	173	1850	2023	0.0265152	0	0.0258427	0.045716	0.0475635
18S	920	U	33	1049	1082	1.18812	0.239222	0.543216	45	2001	2046	0.707268	0.12906	0.414387	56	633	689	1.15386	0.237693	0.536079	0.497894	0.0591199		131	244	375	3.65015	0.552222	0.785402	120	3054	3174	0.54175	0.0597286	0.351458	89	1031	1120	0.952384	0.158704	0.488029	0.54163	0.181166
18S	921	A	6	2739	2745	0.219459	0	0	15	2705	2720	0.278039	0	0.217614	8	1072	1080	0.261939	0	0.207721	0.141778	0.100334		26	1423	1449	0.130138	0	0.115223	22	5424	5446	0.154974	0	0	10	2209	2219	0.091982	0	0	0.0384075	0.0543164
18S	922	A	45	3517	3562	0.433764	0	0	63	5360	5423	0.418426	0	0	96	1269	1365	0.0914918	0	0	0	0		349	2433	2782	0.464331	0	0	339	6381	6720	0.362243	0	0	200	2710	2910	0.357193	0	0	0	0
18S	923	G	96	2449	2545	0.214149	0	0	104	3495	3599	0.0877809	0	0	119	819	938	0.232872	0	0.189049	0.0630163	0.0891185		347	1468	1815	0.13132	0	0	418	2942	3360	0.297081	0	0.229091	183	1578	1761	0.077103	0	0.0716215	0.100237	0.0956897
18S	924	A	22	2395	2417	0.215863	0	0	38	5482	5520	0.462605	0	0	52	1323	1375	0.254175	0	0	0	0		135	1851	1986	0.234502	0	0	194	5929	6123	0.386416	0	0	72	2430	2502	0.320362	0	0	0	0
18S	925	G	61	2065	2126	0.177611	0	0	108	4373	4481	0.362333	0	0	76	851	927	0.0573515	0	0.0542961	0.0180987	0.0255954		345	1453	1798	0.186857	0	0	403	3036	3439	0.0653618	0	0.0613684	198	834	1032	0.639873	0.0682811	0.390427	0.150599	0.171425
18S	926	G	105	1592	1697	0.0642717	0	0	177	3210	3387	0.194385	0	0	120	1051	1171	0.257935	0	0	0	0		268	1342	1610	0.126747	0	0	485	2873	3358	0.0144785	0	0	248	1249	1497	0.00379766	0	0.00378581	0.00126194	0.00178465
18S	927	G	107	769	876	0.740631	0.127506	0.425775	171	1631	1802	0.481568	0.00551722	0.325161	171	738	909	0.0608547	0	0	0.250312	0.181701		202	692	894	0.644904	0.0922453	0.392328	397	2942	3339	0.101055	0	0	223	869	1092	0.356491	0	0.262981	0.218436	0.163235
18S	928	A	73	787	860	0.502207	0	0.334571	110	1370	1480	0.628622	0.0371117	0.386144	98	493	591	0.392098	0	0.282002	0.334239	0.0425164		164	821	985	0.399854	0	0.285847	317	1420	1737	0.593927	0.0392636	0.372753	229	942	1171	0.185372	0	0.156495	0.271698	0.0888519
18S	929	C	39	979	1018	0.00268237	0	0.00267781	76	1918	1994	0.0337065	0	0	86	980	1066	0.35316	0	0	0.000892604	0.00126233		183	1581	1764	0.337583	0	0	304	1684	1988	0.1616	0	0.139179	239	1412	1651	0.252737	0	0	0.0463929	0.0656094
18S	930	G	37	575	612	0.439478	0	0.30565	75	695	770	1.28129	0.156844	0.561972	111	422	533	0.302143	0.00154842	0.232369	0.366664	0.141307		141	687	828	0.451535	0.0582281	0.311333	285	1562	1847	0.13649	0	0.120155	253	996	1249	0.0134578	0	0	0.143829	0.128199
18S	931	G	30	288	318	1.43424	0.220926	0.589954	91	292	383	2.78371	0.383603	0.736216	41	130	171	2.89393	0.515608	0.744301	0.690157	0.0709312		128	455	583	1.03467	0.218804	0.508947	208	586	794	1.42328	0.281825	0.587642	252	275	527	1.38712	0.291714	0.581547	0.559379	0.0357472
18S	932	C	58	319	377	0.749794	0.0604361	0.429153	113	444	557	1.09074	0.097546	0.522148	56	316	372	0.626482	0.0883519	0.385812	0.445704	0.0568762		231	748	979	0.123197	0	0.109784	234	418	652	1.80524	0.334738	0.643876	238	254	492	1.58136	0.329154	0.613089	0.455583	0.24484
18S	933	C	68	292	360	0.730656	0.0673802	0.422861	82	1059	1141	0.149611	0	0	77	407	484	0.189164	0	0.159349	0.19407	0.174369		207	851	1058	0.0660057	0	0.0619736	290	918	1208	0.481371	0	0.325131	350	648	998	0.259126	0	0.205962	0.197689	0.107593
18S	934	G	138	311	449	0.417358	0	0.294924	332	590	922	0.087649	0	0.0806661	188	337	525	0.100253	0	0.0912763	0.155622	0.0985967		567	365	932	0.321508	0	0.243486	679	685	1364	0.339446	0	0.253562	894	759	1653	0.23774	0	0	0.165683	0.117227
18S	935	G	272	225	497	0.348728	0	0.258946	409	329	738	0.439182	0	0.305448	300	251	551	0.107649	0	0.0973461	0.22058	0.0891836		721	564	1285	0.00894246	0	0	966	730	1696	0.132404	0	0.116983	720	957	1677	0.211144	0	0	0.0389945	0.0551465
18S	936	G	323	97	420	0.683954	0.147941	0.406733	397	300	697	0.52999	0.0162244	0.346726	338	201	539	0.133436	0	0.11792	0.29046	0.124439		785	260	1045	0.283663	0.000683191	0.221144	1346	405	1751	0.156164	0	0.135138	839	484	1323	0.0433283	0	0.041559	0.132614	0.0733369
18S	937	G	679	139	818	0.0842898	0	0	768	289	1057	0.0695337	0	0.0650706	488	141	629	0.0557496	0	0.0528852	0.0393186	0.028244		1494	81	1575	0.091152	0	0	2005	323	2328	0.0622442	0	0	1310	298	1608	0.10741	0	0	0	0
18S	938	G	614	62	676	0.266798	0.00781528	0.210854	531	120	651	0.940372	0.186772	0.485018	424	78	502	0.465673	0.0771062	0.318151	0.338008	0.112804		1018	34	1052	0.509476	0.0782582	0.337731	2115	120	2235	0.0863993	0	0.0795609	1019	43	1062	0.486579	0.0404898	0.327522	0.248271	0.119369
18S	939	C	1114	54	1168	0.210845	0	0	1434	75	1509	0.153642	0	0	853	108	961	0.203407	0	0	0	0		2049	59	2108	0.244002	0	0	3741	60	3801	0.327132	0	0	1860	57	1917	0.165294	0	0	0	0
18S	940	A	1131	79	1210	0.17019	0	0	1713	347	2060	0.387325	0	0	837	100	937	0.124994	0	0	0	0		2032	98	2130	0.208306	0	0	3287	78	3365	0.16055	0	0	1835	120	1955	0.14983	0	0	0	0
18S	941	U	1085	159	1244	0.135216	0	0	1771	189	1960	0.319633	0	0	832	211	1043	0.185973	0	0	0	0		1514	385	1899	0.0394561	0	0	2597	86	2683	0.172578	0	0.147225	1694	68	1762	0.0256444	0	0	0.0490751	0.0694026
18S	942	U	736	199	935	0.242854	0	0.195568	1191	107	1298	0.119819	0	0.107072	465	191	656	0.40416	0	0.288143	0.196928	0.0739282		1107	528	1635	0.17064	0	0.145842	1985	274	2259	0.536445	0.0996031	0.349248	1180	124	1304	0.369417	0.0469727	0.269913	0.255001	0.0837066
18S	943	C	1310	190	1500	0.244866	0	0	1557	331	1888	0.26939	0	0	1066	203	1269	0.328408	0	0	0	0		1954	750	2704	0.331965	0	0	3413	714	4127	0.174804	0	0	1903	372	2275	0.263454	0	0	0	0
18S	944	G	1119	62	1181	0.00758601	0	0	818	225	1043	0.409781	0	0.290867	634	102	736	0.245032	0	0.197023	0.16263	0.121211		1034	296	1330	0.514667	0.0456625	0.339958	2753	355	3108	0.198624	0	0.165755	1263	151	1414	0.267012	0	0.210859	0.238857	0.0738223
18S	945	U	1670	154	1824	0.404487	0	0	1593	173	1766	0.222889	0	0	1174	257	1431	0.419499	0	0	0	0		1742	677	2419	0.199275	0	0	4079	589	4668	0.195971	0	0	2131	154	2285	0.244094	0	0	0	0
18S	946	A	1106	56	1162	0.0215535	0	0	1078	112	1190	0.148055	0	0.129056	832	106	938	0.0708082	0	0	0.0430186	0.0608375		1529	422	1951	0.0631375	0	0.0594165	3440	214	3654	0.147031	0	0.128215	1601	245	1846	0.00569693	0	0	0.0625438	0.0523902
18S	947	U	1124	80	1204	0.0904011	0	0	1389	113	1502	0.19362	0	0	791	100	891	0.0370827	0	0	0	0		1756	602	2358	0.107343	0	0	4393	195	4588	0.060708	0	0	1703	244	1947	0.0323694	0	0	0	0
18S	948	U	810	113	923	0.193038	0	0.16195	1233	66	1299	0.137359	0	0	517	229	746	0.154842	0	0.134236	0.0987288	0.0707227		1306	503	1809	0.235678	0	0.190813	5118	250	5368	0.14467	0	0	1431	197	1628	0.193029	0	0.161881	0.117565	0.0839657
18S	949	G	710	67	777	0.457398	0.0634198	0.314123	592	31	623	0.884117	0.151409	0.469647	331	47	378	1.43814	0.310298	0.590491	0.458087	0.113122		805	211	1016	1.41766	0.322824	0.586615	2628	277	2905	0.866284	0.180719	0.464262	995	114	1109	0.87971	0.207276	0.468227	0.506368	0.0567662
18S	950	C	667	94	761	0.495757	0.062227	0.331733	1061	176	1237	0.114558	0	0	516	154	670	0.378606	0	0.274927	0.20222	0.14486		1306	1137	2443	0.00620113	0	0.00616542	4153	531	4684	0.265566	0	0.209875	1616	203	1819	0.165464	0	0.14204	0.11936	0.0846963
18S	951	G	626	30	656	0.761762	0.154876	0.43276	821	73	894	0.291881	0	0.22613	547	40	587	0.646769	0.0879336	0.393156	0.350682	0.0895433		1823	178	2001	0.349378	0.0469906	0.259014	4505	352	4857	0.370564	0.0289428	0.270414	1695	115	1810	0.241923	0.00198819	0.194884	0.241437	0.0332457
18S	952	C	1065	49	1114	0.011998	0	0	742	49	791	0.493715	0.00184475	0.330808	923	68	991	0.0476927	0	0	0.110269	0.155944		3404	257	3661	0.271728	0	0	7979	313	8292	0.1782	0	0	2971	100	3071	0.286831	0	0	0	0
18S	953	C	968	63	1031	0.141247	0	0.12387	416	94	510	1.61733	0.282876	0.618394	901	50	951	0.0912698	0	0.0837169	0.275327	0.243138		3164	141	3305	0.0773543	0	0	5050	455	5505	0.437034	0.0482125	0.304161	2843	107	2950	0.1846	0	0	0.101387	0.143383
18S	954	G	1225	23	1248	0.00431456	0	0	513	37	550	1.76893	0.318924	0.639268	1065	46	1111	0.0269984	0	0.0263117	0.22186	0.295348		2569	109	2678	0.371221	0	0.270796	7444	187	7631	0.0925358	0	0.0847084	1780	70	1850	0.510337	0.0189603	0.338017	0.231174	0.107141
18S	955	C	1591	31	1622	0.222934	0	0	1477	127	1604	0.04063	0	0	1151	65	1216	0.0045467	0	0	0	0		3207	176	3383	0.15001	0	0.130476	9858	271	10129	0.157421	0	0	2338	156	2494	0.149441	0	0.130057	0.0868444	0.0614085
18S	956	U	1610	89	1699	0.211516	0	0	1988	187	2175	0.202742	0	0	1719	129	1848	0.306947	0	0	0	0		4241	292	4533	0.0596873	0	0	13436	347	13783	0.364467	0	0	3491	217	3708	0.204595	0	0	0	0
18S	957	A	1051	74	1125	0.310973	0	0.237369	1470	118	1588	0.233284	0	0.189254	884	118	1002	0.476171	0.0286133	0.32279	0.249804	0.0552206		2995	211	3206	0.451069	0	0.31092	11465	280	11745	0.222278	0	0	2481	167	2648	0.200457	0	0.167037	0.159319	0.12705
18S	958	G	1289	66	1355	0.110914	0	0.099907	1698	229	1927	0.074562	0	0.0694218	1161	152	1313	0.165466	0	0.142067	0.103799	0.0297846		3477	135	3612	0.330083	0	0.248219	8573	272	8845	0.0624488	0	0.0587844	2393	305	2698	0.211918	0	0.174915	0.160639	0.0779922
18S	959	A	1763	58	1821	0.184724	0	0	2833	117	2950	0.283719	0	0	1752	158	1910	0.20432	0	0	0	0		6306	276	6582	0.305965	0	0	11520	362	11882	0.267663	0	0	3997	467	4464	0.312405	0	0	0	0
18S	960	G	2053	92	2145	0.310034	0	0	3752	138	3890	0.435792	0	0	2132	152	2284	0.334607	0	0	0	0		10012	233	10245	0.58695	0	0	10035	416	10451	0.188565	0	0	5138	303	5441	0.460784	0	0	0	0
18S	961	G	1114	112	1226	0.269981	0	0.212723	1760	206	1966	0.281393	0	0.219686	1018	232	1250	0.298685	0	0.230132	0.220847	0.00715449		3853	142	3995	0.21965	0	0.18013	7575	244	7819	0.0382509	0	0.0368462	2298	278	2576	0.241431	0	0.194539	0.137172	0.0711841
18S	962	U	1553	232	1785	0.195813	0	0	3160	448	3608	0.359469	0	0	1871	341	2212	0.337586	0	0	0	0		6955	342	7297	0.416149	0	0	9901	405	10306	0.327576	0	0	3184	569	3753	0.225881	0	0	0	0
18S	963	G	1071	453	1524	0.0482623	0	0	1932	180	2112	0.241042	0	0.1943	1364	376	1740	0.136952	0	0	0.0647666	0.0915938		3400	72	3472	0.309	0	0.23611	4417	362	4779	0.407736	0.0499768	0.289683	2121	364	2485	0.173988	0	0.148253	0.224682	0.0583011
18S	964	A	920	383	1303	0.167476	0	0.143546	1412	398	1810	0.548353	0.00498293	0.354279	1025	443	1468	0.0728008	0	0.0679036	0.188576	0.121171		2576	167	2743	0.626996	0	0.385457	2775	1042	3817	0.635274	0.0580985	0.388544	1925	693	2618	0.0997751	0	0.0907547	0.288252	0.139657
18S	965	A	1127	290	1417	0.0893982	0	0.0821152	1663	538	2201	0.31921	0	0.242054	1096	328	1424	0.13586	0	0.119683	0.147951	0.0682855		2688	522	3210	0.317506	0	0.241047	3156	1005	4161	0.403447	0	0.287518	1777	566	2343	0.248801	0	0.1993	0.242621	0.036032
18S	966	A	1047	505	1552	0.0181799	0	0	2325	763	3088	0.0789828	0	0	939	437	1376	0.175018	0	0.149041	0.0496805	0.0702588		2860	1049	3909	0.0284569	0	0	1825	1086	2911	0.879094	0.0678212	0.467914	1679	707	2386	0.166867	0	0.143056	0.203657	0.195772
18S	967	U	444	371	815	0.907217	0.179638	0.475982	1348	692	2040	0.421482	0	0.296611	454	279	733	1.24423	0.238822	0.55475	0.442448	0.10802		1050	814	1864	0.908138	0.120455	0.476063	824	1109	1933	1.7421	0.26877	0.635436	794	577	1371	1.01063	0.200523	0.502825	0.538108	0.0696832
18S	968	U	392	459	851	0.798122	0.0920362	0.444154	1014	371	1385	1.13822	0.100235	0.5325	354	252	606	1.77393	0.341938	0.639881	0.538845	0.0800311		1068	485	1553	1.23067	0.182473	0.551864	776	756	1532	2.39901	0.38236	0.705933	718	405	1123	1.46022	0.27094	0.593747	0.617181	0.0650443
18S	969	C	939	857	1796	0.213696	0	0	2653	2481	5134	0.512098	0	0	1409	585	1994	0.22166	0	0	0	0		2581	2308	4889	0.416953	0	0	3665	2711	6376	0.307938	0	0	1524	1470	2994	0.171642	0	0	0	0
18S	970	U	643	1698	2341	0.403017	0	0	2265	2089	4354	0.358472	0	0	1330	1016	2346	0.293675	0	0	0	0		2090	1449	3539	0.162963	0	0	3844	3716	7560	0.428421	0	0	1379	2590	3969	0.390344	0	0	0	0
18S	971	U	357	1858	2215	0.352106	0	0	2335	1894	4229	0.315608	0	0	1082	1379	2461	0.269221	0	0	0	0		1957	1545	3502	0.163879	0	0	3363	3913	7276	0.410926	0	0	1316	3051	4367	0.454983	0	0	0	0
18S	972	G	493	1231	1724	0.144116	0	0	2335	560	2895	0.029324	0	0.0284981	985	981	1966	0.0343558	0	0	0.00949938	0.0134341		1642	1047	2689	0.0954895	0	0.0871956	1164	4071	5235	0.157378	0	0	900	1706	2606	0.0317521	0	0	0.0290652	0.0411044
18S	973	G	342	562	904	0.707514	0.0359654	0.414622	1214	332	1546	0.985621	0.0182366	0.496541	791	478	1269	0.646422	0	0.39281	0.434657	0.044655		1023	1720	2743	0.0249919	0	0.0243912	1851	4188	6039	0.283116	0	0	789	1884	2673	0.0745284	0	0	0.0081304	0.0114981
18S	974	A	101	480	581	1.71502	0.299965	0.632079	398	312	710	3.36315	0.395574	0.771056	783	507	1290	0.674989	0.00666548	0.403168	0.602101	0.151678		618	1749	2367	0.190475	0	0.160056	963	3086	4049	0.12699	0	0.112706	525	1071	1596	0.623287	0.0624024	0.384114	0.218959	0.118372
18S	975	C	288	1014	1302	0.17244	0	0.147174	1101	1261	2362	0.24357	0	0.19593	1526	586	2112	0.0562076	0	0.0532403	0.132115	0.0592181		864	2100	2964	0.0486678	0	0	739	2390	3129	0.617849	0.0153197	0.381971	594	981	1575	0.720439	0.106507	0.418907	0.266959	0.18937
18S	976	C	384	1805	2189	0.359665	0	0	2448	3053	5501	0.562551	0	0	2789	846	3635	0.412715	0	0	0	0		1175	1416	2591	0.0813529	0	0.0752594	1082	2142	3224	0.616903	0	0.381607	1077	1672	2749	0.0462263	0	0	0.152289	0.165038
18S	977	G	527	1147	1674	0.12668	0	0	2442	1105	3547	0.272034	0	0	2847	569	3416	0.314786	0	0	0	0		1603	865	2468	0.19473	0	0.163046	1192	474	1666	2.63859	0.342429	0.725288	1292	1211	2503	0.0982206	0	0.0894687	0.325934	0.283979
18S	978	G	258	1050	1308	0.141864	0	0.124322	1094	453	1547	0.758656	0	0.431543	943	362	1305	1.0678	0.117217	0.516585	0.357483	0.168486		593	1838	2431	0.261431	0	0.207317	1336	1439	2775	1.41676	0.200177	0.586311	524	1031	1555	0.873165	0.172406	0.466304	0.419977	0.158153
18S	979	C	388	957	1345	0.120588	0	0.107683	1726	994	2720	0.0739638	0	0	1920	786	2706	0.00843903	0	0	0.0358942	0.050762		597	1508	2105	0.630701	0.12309	0.386879	2374	2636	5010	0.461032	0	0.315596	889	1509	2398	0.245649	0	0.197271	0.299915	0.0781971
18S	980	G	311	707	1018	0.645469	0.0840622	0.392505	878	502	1380	1.02826	0.0798643	0.507149	923	378	1301	1.36063	0.262755	0.576572	0.492075	0.0758974		885	1066	1951	1.09056	0.198796	0.521788	1816	2790	4606	0.911032	0.17903	0.476777	566	1625	2191	0.522389	0.0996989	0.343241	0.447268	0.0758191
18S	981	C	518	1120	1638	0.0707342	0	0.0660991	1259	1177	2436	0.170893	0	0.146002	2336	697	3033	0.0100894	0	0	0.0707004	0.0596939		2625	1315	3940	0.167758	0	0.143689	3674	8051	11725	0.200246	0	0	1427	2839	4266	0.210913	0	0	0.0478964	0.0677358
18S	982	A	476	994	1470	0.278405	0.0190077	0.217891	1167	1095	2262	0.291526	0	0.225799	1921	898	2819	0.0857092	0	0.0789689	0.17422	0.0674298		2873	1338	4211	0.205352	0	0.170401	3400	6753	10153	0.0751286	0	0.0698851	1084	3124	4208	0.149473	0	0	0.0800953	0.0699394
18S	983	A	733	1656	2389	0.233361	0	0	1909	1984	3893	0.323118	0	0	2800	2403	5203	0.476655	0	0	0	0		3539	2324	5863	0.0609046	0	0	4285	13769	18054	0.388629	0	0	1613	3791	5404	0.342716	0	0	0	0
18S	984	G	674	1151	1825	0.117671	0	0.105334	1406	1400	2806	0.0016823	0	0.00168007	2187	1559	3746	0.25187	0	0	0.0356713	0.0492636		2488	2121	4609	0.380443	0	0.275638	2653	12848	15501	0.213398	0	0	972	3010	3982	0.0334282	0	0	0.0918795	0.129937
18S	985	A	754	951	1705	0.350554	0.00198487	0.259676	923	848	1771	0.764384	0.157583	0.433369	1985	1612	3597	0.220678	0	0	0.231015	0.178079		3101	4044	7145	0.0647231	0	0	2287	10053	12340	0.0645833	0	0.0606699	906	2921	3827	0.0519651	0	0.0494103	0.0366934	0.0263502
18S	986	C	852	2035	2887	0.14104	0	0	1305	2724	4029	0.240204	0	0	1967	2173	4140	0.359596	0	0	0	0		5992	5491	11483	0.398475	0	0	3011	18326	21337	0.42195	0	0	1487	4708	6195	0.389823	0	0	0	0
18S	987	G	806	1931	2737	0.0619065	0	0.0583176	1107	2842	3949	0.140577	0	0	527	1698	2225	0.280373	0	0.219055	0.0924574	0.0926297		6920	4659	11579	0.373335	0	0	2515	13784	16299	0.208047	0	0	1695	2023	3718	0.101751	0	0.0923763	0.0307921	0.0435466
18S	988	G	953	1472	2425	0.326166	0	0.246023	1175	1735	2910	0.303374	0	0.232822	520	904	1424	0.992125	0.206441	0.498199	0.325681	0.122107		3251	2975	6226	0.266237	0	0.210285	2383	12053	14436	0.141761	0	0	815	2129	2944	0.394639	0.0798524	0.283037	0.164441	0.120011
18S	989	A	1162	1077	2239	0.544196	0.0701518	0.352516	1428	1403	2831	0.398172	0.0308919	0.284852	645	996	1641	0.627467	0.0745266	0.385692	0.34102	0.0419627		2308	5696	8004	0.0578069	0	0	2573	7813	10386	0.151632	0	0.131678	797	2303	3100	0.265792	0	0.210035	0.113904	0.0866624
18S	990	C	1756	1502	3258	0.086233	0	0.0794096	1816	1695	3511	0.145099	0	0.126745	343	1222	1565	0.588548	0.0705422	0.370643	0.192266	0.127604		3592	5834	9426	0.241487	0	0	3367	5888	9255	0.183899	0	0.155347	1119	2857	3976	0.0676277	0	0	0.0517824	0.0732314
18S	991	C	3736	932	4668	0.24656	0	0	2151	2084	4235	0.0295562	0	0	887	947	1834	0.286842	0	0.222998	0.0743328	0.105122		3102	4425	7527	0.0669973	0	0	3531	5483	9014	0.0919468	0	0.084213	1236	2903	4139	0.127525	0	0	0.028071	0.0396984
18S	992	A	4726	765	5491	0.338264	0	0	3140	2003	5143	0.164809	0	0	1986	551	2537	0.0966027	0	0	0	0		5468	4915	10383	0.401983	0	0	4860	3809	8669	0.0422722	0	0.0405622	2073	1063	3136	0.172939	0	0.147481	0.0626811	0.0622072
18S	993	G	5873	717	6590	0.459923	0	0	4329	1788	6117	0.306872	0	0	2471	447	2918	0.22317	0	0	0	0		2572	2691	5263	0.168079	0	0.143917	5551	2521	8072	0.0228264	0	0	2018	1799	3817	0.101793	0	0	0.0479723	0.067843
18S	994	A	3820	376	4196	0.0965716	0	0	3875	2257	6132	0.313388	0	0	2204	825	3029	0.222098	0	0	0	0		1356	1725	3081	0.900894	0.173793	0.474013	4113	952	5065	0.451005	0.0715423	0.310865	1707	2277	3984	0.14585	0	0	0.261626	0.196622
18S	995	G	2081	836	2917	0.304238	0	0.23333	1728	1617	3345	0.323846	0	0.24468	1067	595	1662	0.552268	0.0583902	0.355919	0.277977	0.0553083		623	1977	2600	1.14941	0.207496	0.534852	2023	1010	3033	1.23778	0.281558	0.553209	1185	874	2059	0.717077	0.161804	0.417733	0.501931	0.0600072
18S	996	C	1919	1510	3429	0.0457564	0	0.0437666	1403	3064	4467	0.0496643	0	0	1038	1320	2358	0.0853563	0	0.0786743	0.0408136	0.0321865		352	3741	4093	0.26328	0	0.20845	2679	4256	6935	0.151362	0	0	1504	2449	3953	0.187352	0	0	0.0694833	0.0982642
18S	997	G	1534	585	2119	0.651682	0.0359635	0.394669	1856	2061	3917	0.0746951	0	0.0695201	877	1238	2115	0.233948	0	0.189666	0.217952	0.13424		803	1528	2331	1.17294	0.195463	0.5399	1938	1629	3567	0.647126	0.0960886	0.392949	1959	1188	3147	0.00372018	0	0.00370756	0.312185	0.226226
18S	998	A	3818	488	4306	0.309837	0	0	3211	2364	5575	0.318484	0	0	2282	1270	3552	0.308065	0	0	0	0		2284	1794	4078	0.160788	0	0.138546	4450	1675	6125	0.149267	0	0	1821	1809	3630	0.191524	0	0	0.0461819	0.0653111
18S	999	A	2925	489	3414	0.206881	0	0	2332	1443	3775	0.0313971	0	0	2024	1618	3642	0.348925	0	0	0	0		2425	3035	5460	0.229586	0	0	3884	2532	6416	0.254188	0	0	1901	1374	3275	0.146327	0	0	0	0
18S	1000	A	1967	538	2505	0.0520395	0	0	1549	1408	2957	0.121847	0	0.108645	1348	1844	3192	0.28923	0	0	0.0362151	0.0512159		3159	3433	6592	0.400453	0	0	2709	3030	5739	0.224021	0	0	1966	1872	3838	0.353747	0	0	0	0
18S	1001	G	936	479	1415	0.569947	0.0762662	0.363199	457	1043	1500	1.06046	0.157882	0.514839	402	1454	1856	0.237031	0	0.191696	0.356578	0.132005		1413	2638	4051	0.0517742	0	0.0492371	1459	2131	3590	0.245927	0	0.197429	756	804	1560	0.613147	0.105145	0.380245	0.20897	0.135379
18S	1002	C	879	534	1413	0.480874	0	0.324878	797	2458	3255	0.143472	0	0	412	1747	2159	0.0590741	0	0.0558034	0.126894	0.141838		4052	2034	6086	0.316487	0	0	2009	2850	4859	0.117835	0	0	1072	705	1777	0.345944	0.00804647	0.257135	0.0857115	0.121214
18S	1003	A	916	347	1263	0.622495	0	0.383852	670	2685	3355	0.197735	0	0	346	1161	1507	0.579686	0.0376248	0.367117	0.250323	0.177137		3522	1015	4537	0.0116106	0	0.0114798	1525	2253	3778	0.140096	0	0.122909	890	1122	2012	0.116802	0	0.104633	0.0796739	0.0487943
18S	1004	U	1465	577	2042	0.0573721	0	0	661	1573	2234	0.189252	0	0.159195	421	1570	1991	0.160542	0	0.138394	0.0991962	0.0706545		3492	1284	4776	0.00848045	0	0	1784	1848	3632	0.187155	0	0.157686	897	1071	1968	0.103121	0	0.0935239	0.0837368	0.0647461
18S	1005	U	783	294	1077	0.845516	0.0679989	0.458377	280	830	1110	1.37138	0.203271	0.578524	224	1210	1434	0.673473	0.0665617	0.402608	0.479836	0.0734029		1164	751	1915	1.73927	0.329876	0.63506	1139	1464	2603	0.686836	0.109877	0.407267	403	683	1086	1.07336	0.17141	0.517921	0.520083	0.0930085
18S	1006	U	558	173	731	1.78563	0.335467	0.641329	255	520	775	2.37904	0.369197	0.704326	182	747	929	1.63332	0.329326	0.620505	0.655387	0.0356346		1510	401	1911	1.78301	0.331071	0.640798	1001	998	1999	1.21266	0.267185	0.548179	403	532	935	1.40335	0.263704	0.584173	0.59105	0.0381227
18S	1007	G	749	453	1202	0.697793	0.125734	0.411201	290	936	1226	1.08614	0.111719	0.520848	284	1633	1917	0.21936	0	0.179975	0.370675	0.142081		1635	1793	3428	0.479317	0	0.324076	1132	1836	2968	0.443767	0.0487144	0.307439	678	1076	1754	0.206578	0	0.171291	0.267602	0.0684402
18S	1008	C	1926	555	2481	0.176869	0	0	1055	2728	3783	0.383004	0	0	945	2567	3512	0.365335	0	0	0	0		3688	2357	6045	0.196615	0	0	2589	2380	4969	0.165046	0	0	1480	780	2260	0.0575262	0	0	0	0
18S	1009	C	3180	418	3598	0.418462	0	0	1986	2664	4650	0.51786	0	0	1697	1974	3671	0.37638	0	0	0	0		7484	2141	9625	0.540156	0	0	3897	3109	7006	0.428124	0	0	2281	1022	3303	0.365728	0	0	0	0
18S	1010	A	2017	202	2219	0.0712513	0	0.0665402	1452	707	2159	0.152922	0	0.132692	981	1423	2404	0.0404389	0	0.0388827	0.0793715	0.0393575		5203	899	6102	0.191937	0	0	2536	2257	4793	0.0984448	0	0	1438	1200	2638	0.16961	0	0	0	0
18S	1011	A	3199	279	3478	0.335741	0	0	2867	489	3356	0.282809	0	0	1921	2115	4036	0.418347	0	0	0	0		6100	1394	7494	0.375083	0	0	3726	2303	6029	0.293009	0	0	2359	1292	3651	0.412076	0	0	0	0
18S	1012	G	2316	431	2747	0.0932072	0	0	1799	707	2506	0.0357045	0	0.0344869	1289	1232	2521	0.00636179	0	0.00632407	0.0136037	0.0149907		3382	2048	5430	0.0972851	0	0	2794	2171	4965	0.112064	0	0	1428	979	2407	0.0135151	0	0	0	0
18S	1013	A	1843	202	2045	0.301119	0	0.231518	1253	482	1735	0.590623	0.0667919	0.37145	964	780	1744	0.508309	0.0854974	0.337134	0.313367	0.0595479		1655	831	2486	1.08058	0.198937	0.519465	1802	1517	3319	0.391416	0.0400135	0.281368	1108	821	1929	0.269758	0	0.212535	0.33779	0.131502
18S	1014	A	2149	322	2471	0.100993	0	0.091763	1425	404	1829	0.537213	0.103174	0.349596	1010	800	1810	0.420627	0.0634129	0.296201	0.245853	0.111117		2388	639	3027	0.674196	0.096655	0.402778	1616	1665	3281	0.385913	0.0510326	0.278515	957	626	1583	0.542572	0.0741118	0.351876	0.34439	0.0510055
18S	1015	U	2594	623	3217	0.176341	0	0	1910	841	2751	0.0277818	0	0	1278	1338	2616	0.111103	0	0	0	0		2790	1107	3897	0.213426	0	0.175924	2536	2349	4885	0.138068	0	0	1553	784	2337	0.019366	0	0	0.0586414	0.0829314
18S	1016	G	1294	1060	2354	0.127544	0	0.113159	1123	1102	2225	0.196037	0.00899944	0.163967	716	1490	2206	0.00302573	0	0	0.0923754	0.0685335		1231	4501	5732	0.287179	0	0	1256	2503	3759	0.103443	0	0.093768	869	756	1625	0.408788	0.0137435	0.290297	0.128022	0.120963
18S	1017	U	1640	961	2601	0.0707276	0	0.0660794	1742	1497	3239	0.166396	0	0	1083	1511	2594	0.192969	0	0	0.0220265	0.0311501		2116	1453	3569	0.254516	0	0.202925	1832	3079	4911	0.177319	0	0	1277	1811	3088	0.321042	0	0	0.0676417	0.0956598
18S	1018	U	716	1664	2380	0.2739	0	0.21508	988	1985	2973	0.0135769	0	0	621	1494	2115	0.00740391	0	0.00735294	0.0741443	0.0997017		1274	2133	3407	0.421078	0	0.29637	1622	1803	3425	0.244464	0	0.196487	1036	1738	2774	0.23777	0	0	0.164286	0.123116
18S	1019	U	506	1876	2382	0.331566	0	0.249083	593	2038	2631	0.175545	0	0.149379	446	1460	1906	0.110686	0	0.0997024	0.166055	0.062114		1082	2445	3527	0.417026	0	0.294355	1322	2266	3588	0.219972	0	0.18035	842	930	1772	0.293846	0	0.22721	0.233972	0.0467875
18S	1020	U	355	3089	3444	0.0623899	0	0	460	2413	2873	0.126293	0	0.112166	392	1532	1924	0.0979048	0	0.0892164	0.0671276	0.0483822		909	4625	5534	0.0786871	0	0	974	2080	3054	0.549282	0.118739	0.354615	684	781	1465	0.659322	0.113664	0.397508	0.250707	0.17814
18S	1021	C	532	2346	2878	0.206221	0	0.171014	828	2416	3244	0.0157199	0	0.0154813	595	818	1413	0.535989	0.0527471	0.349115	0.178537	0.136309		1530	2017	3547	0.581614	0	0.3678	1383	2200	3583	0.382155	0.0875066	0.276548	1049	647	1696	0.496523	0.0926495	0.331915	0.325421	0.0375354
18S	1022	A	518	1296	1814	1.10733	0.24322	0.525604	726	1960	2686	0.324215	0.00342467	0.244905	408	689	1097	1.04834	0.200322	0.512028	0.427512	0.129242		1834	872	2706	1.23114	0.184897	0.55189	1360	3035	4395	0.164728	0.0308769	0.141458	1041	1084	2125	0.257735	0.00606966	0.204997	0.299448	0.180378
18S	1023	U	706	4571	5277	0.330683	0	0	1035	3399	4434	0.22811	0	0	564	1561	2125	0.00537263	0	0	0	0		2755	6800	9555	0.442319	0	0	1765	4276	6041	0.147219	0	0	1498	1000	2498	0.113094	0	0.10164	0.03388	0.0479135
18S	1024	U	957	5935	6892	0.501717	0	0	1249	4800	6049	0.461664	0	0	853	3385	4238	0.564654	0	0	0	0		3430	9440	12870	0.595369	0	0	2203	4769	6972	0.23802	0	0	1740	1670	3410	0.166038	0	0	0	0
18S	1025	A	635	3112	3747	0.0186885	0	0.0183504	928	2280	3208	0.100242	0	0.0911352	419	1474	1893	0.0933709	0	0.0854385	0.0649747	0.0330503		2040	3342	5382	0.139546	0	0.122478	1631	4951	6582	0.159649	0	0	1295	2200	3495	0.158708	0	0	0.0408259	0.0577366
18S	1026	A	804	2873	3677	0.018739	0	0.0183993	922	2549	3471	0.0241295	0	0	498	1314	1812	0.113256	0	0.101785	0.0400613	0.0442866		2666	2752	5418	0.105493	0	0.0954422	1955	5216	7171	0.231327	0	0	1401	2045	3446	0.110631	0	0	0.0318141	0.0449919
18S	1027	U	849	3163	4012	0.136252	0	0	931	1497	2428	0.352413	0	0.26066	485	1409	1894	0.00819701	0	0	0.0868867	0.122876		2641	2470	5111	0.102597	0	0.0930671	2080	4111	6191	0.121417	0	0	1389	1907	3296	0.0755502	0	0	0.0310224	0.0438723
18S	1028	C	1333	4005	5338	0.411794	0	0	1677	3547	5224	0.468068	0	0	1067	2063	3130	0.469381	0	0	0	0		4588	2020	6608	0.201056	0	0	2838	3824	6662	0.201578	0	0	2128	2401	4529	0.338519	0	0	0	0
18S	1029	A	607	1418	2025	0.674992	0.086694	0.403101	942	1268	2210	0.35444	0	0.261775	447	791	1238	0.475258	0	0.322329	0.329068	0.0578926		1828	1652	3480	0.595209	0	0.37319	1489	3141	4630	0.15771	0	0.136251	1069	1764	2833	0.137227	0	0.120705	0.210049	0.115533
18S	1030	A	1519	1368	2887	0.0222838	0	0.0218054	2021	1026	3047	0.13509	0	0	857	816	1673	0.00988982	0	0	0.00726847	0.0102792		4152	2410	6562	0.30495	0	0	3295	3734	7029	0.321968	0	0	2557	1936	4493	0.341631	0	0	0	0
18S	1031	G	1137	1425	2562	0.0438072	0	0.0419843	1307	809	2116	0.182019	0	0.154051	686	540	1226	0.262374	0	0.207976	0.134671	0.0691377		2460	2180	4640	0.0902583	0	0	2330	2048	4378	0.0987339	0	0.0898802	1704	1169	2873	0.0913941	0	0.0837674	0.0578825	0.0410051
18S	1032	A	732	926	1658	0.623367	0.0330394	0.384139	865	580	1445	0.761311	0.0387433	0.432411	490	636	1126	0.382924	0	0.277072	0.364541	0.0649132		1369	1209	2578	0.739098	0.0601201	0.425084	1289	2164	3453	0.375973	0	0.273299	1355	1194	2549	0.275429	0	0.216017	0.3048	0.08821
18S	1033	A	9	280	289	8.48912	0.7413	0.894941	19	26	45	56.8048	0.951648	0.98307	5	58	63	24.7118	0.89276	0.961692	0.946568	0.0375342	1	13	570	583	7.11834	0.691455	0.877007	17	52	69	68.6927	0.964092	0.985853	16	19	35	96.7099	0.973005	0.990047	0.950969	0.0523271	1
18S	1034	C	610	1453	2063	0.246743	0	0.197987	922	1009	1931	0.291799	0	0.225976	416	711	1127	0.350621	0	0.25977	0.227911	0.0252599		1714	2032	3746	0.230318	0	0.187242	1537	3143	4680	0.0982743	0	0	2125	1550	3675	0.146787	0	0	0.0624141	0.0882669
18S	1035	G	1024	1549	2573	0.0286238	0	0.0278378	1404	1331	2735	0.114007	0	0	693	966	1659	0.109993	0	0	0.00927928	0.0131229		1814	3590	5404	0.142136	0	0	2267	1480	3747	0.141355	0	0.123878	2249	1063	3312	0.0017708	0	0	0.0412926	0.0583965
18S	1036	A	353	1611	1964	0.52095	0.0282981	0.342631	525	1553	2078	0.323312	0	0.244409	264	1217	1481	0.0895412	0	0.0822334	0.223091	0.10737		587	976	1563	2.55938	0.452029	0.719182	816	2767	3583	0.219723	0	0.180183	759	1450	2209	0.6409	0.0454897	0.390686	0.430017	0.221796
18S	1037	A	1572	1733	3305	0.0809874	0	0	2009	1429	3438	0.185089	0	0	911	1382	2293	0.284757	0	0	0	0		2446	2894	5340	0.0109301	0	0.0108139	2626	2991	5617	0.249037	0	0	2626	1911	4537	0.2323	0	0	0.00360465	0.00509774
18S	1038	A	1542	2268	3810	0.1856	0	0	2276	1622	3898	0.24653	0	0	946	1545	2491	0.308119	0	0	0	0		2579	5522	8101	0.341341	0	0	2881	3591	6472	0.339566	0	0	3493	2402	5895	0.413682	0	0	0	0
18S	1039	G	946	1671	2617	0.29843	0	0.229907	1327	1552	2879	0.150312	0	0.13071	562	712	1274	0.534161	0.00356477	0.348356	0.236324	0.0889693		1162	5323	6485	0.0938192	0	0	1900	1727	3627	0.311466	0	0.237545	1847	1024	2871	0.350545	0	0.259625	0.165723	0.11753
18S	1040	U	1202	3184	4386	0.244612	0	0	1538	1526	3064	0.140413	0	0.12316	707	957	1664	0.197664	0	0.165124	0.0960948	0.0700757		1246	7226	8472	0.3125	0	0	1720	2479	4199	0.15981	0	0.137818	2196	1210	3406	0.161403	0	0.139008	0.0922751	0.0652502
18S	1041	C	1090	5275	6365	0.527855	0	0	1767	2476	4243	0.2112	0	0	850	1739	2589	0.279365	0	0	0	0		1210	6772	7982	0.285711	0	0	1934	3097	5031	0.0886327	0	0	3871	1778	5649	0.376328	0	0	0	0
18S	1042	G	1432	3308	4740	0.366327	0	0	2533	2463	4996	0.371178	0	0	1059	1275	2334	0.217659	0	0	0	0		1907	6979	8886	0.411175	0	0	2954	1967	4921	0.105359	0	0	3144	1483	4627	0.260189	0	0	0	0
18S	1043	G	2026	1881	3907	0.244584	0	0	2961	1568	4529	0.299627	0	0	1395	1341	2736	0.354382	0	0	0	0		2795	3711	6506	0.17587	0	0	3663	3103	6766	0.395309	0	0	3246	1336	4582	0.269188	0	0	0	0
18S	1044	A	962	1094	2056	0.399109	0	0.285358	2058	1118	3176	0.0146854	0	0	853	1242	2095	0.176474	0	0	0.0951195	0.134519		1215	2923	4138	0.239704	0	0.193393	1357	3938	5295	0.249685	0	0	1478	1756	3234	0.00064915	0	0	0.0644644	0.0911665
18S	1045	G	1352	989	2341	0.0819907	0	0.0758076	3089	1114	4203	0.346641	0	0	1083	824	1907	0.153302	0	0	0.0252692	0.035736		2470	2745	5215	0.158996	0	0	3390	1364	4754	0.226337	0	0	1681	867	2548	0.166301	0	0.142636	0.0475453	0.0672393
18S	1046	G	915	236	1151	1.11307	0.158284	0.526971	1789	497	2286	0.210912	0	0.174239	772	234	1006	0.65133	0.106614	0.394665	0.365292	0.145492		1268	633	1901	1.2852	0.237315	0.56253	1973	744	2717	0.374033	0.0201027	0.272288	1944	365	2309	0.234238	0	0.18985	0.341556	0.159836
18S	1047	U	428	60	488	3.47566	0.441827	0.776924	641	157	798	2.38992	0.424992	0.705268	418	85	503	2.21916	0.398597	0.689785	0.723992	0.0379586		569	32	601	5.62202	0.621331	0.849202	846	83	929	3.03117	0.503072	0.752134	655	14	669	3.25667	0.49583	0.765343	0.788893	0.0429845	1
18S	1048	U	343	182	525	2.45953	0.327886	0.711334	495	121	616	2.97254	0.426174	0.748577	452	174	626	1.35837	0.202768	0.576369	0.67876	0.0739808		884	201	1085	2.33793	0.323767	0.700606	778	70	848	3.10518	0.4673	0.756623	524	61	585	3.43809	0.503889	0.774976	0.744068	0.0316325
18S	1049	C	1423	722	2145	0.32813	0	0	1811	1170	2981	0.330669	0	0	1435	610	2045	0.389714	0	0	0	0		3210	616	3826	0.174381	0	0	2268	1479	3747	0.19271	0	0	1495	1885	3380	0.351888	0	0	0	0
18S	1050	G	718	603	1321	0.0623214	0	0.0587071	774	835	1609	0.216135	0	0.177814	770	357	1127	0.115987	0	0.104015	0.113512	0.0490867		1188	709	1897	0.696376	0	0.410636	1076	1721	2797	0.0467675	0	0.0446933	895	1442	2337	0.0647514	0	0	0.151776	0.183948
18S	1051	A	714	752	1466	0.0992805	0	0	670	661	1331	0.389556	0	0.280497	676	506	1182	0.0121067	0	0	0.0934991	0.132228		1261	1398	2659	0.155096	0	0.134315	1229	1554	2783	0.00897589	0	0	878	1336	2214	0.0376273	0	0	0.0447716	0.0633166
18S	1052	A	724	819	1543	0.189479	0	0	961	1026	1987	0.197658	0	0	940	572	1512	0.293985	0	0	0	0		1937	2379	4316	0.351479	0	0	1752	1828	3580	0.293115	0	0	1144	1519	2663	0.232232	0	0	0	0
18S	1053	G	508	612	1120	0.284022	0	0.221351	858	660	1518	0.141058	0	0.123692	476	488	964	0.244629	0	0.196711	0.180585	0.0414681		1692	1489	3181	0.0147042	0	0.0144956	1133	2351	3484	0.223533	0	0	806	1228	2034	0.121949	0	0.108742	0.0410791	0.0482093
18S	1054	A	378	741	1119	0.40751	0	0.289709	552	645	1197	0.598024	0	0.374423	371	526	897	0.427926	0	0.299918	0.32135	0.037759		727	3870	4597	0.260002	0	0	527	1208	1735	0.792633	0.0530066	0.442304	841	1052	1893	0.332213	0	0.249468	0.230591	0.181062
18S	1055	C	596	1257	1853	0.129372	0	0	741	2263	3004	0.394365	0	0	635	909	1544	0.190169	0	0	0	0		1168	5166	6334	0.455719	0	0	1042	2621	3663	0.145139	0	0	1415	1872	3287	0.215325	0	0	0	0
18S	1056	G	379	1098	1477	0.157803	0	0.136375	360	1150	1510	0.330039	0	0.248266	416	675	1091	0.189042	0	0.159109	0.18125	0.0482877		510	1590	2100	0.886139	0.0471803	0.469935	988	1994	2982	0.108921	0	0.0982521	896	967	1863	0.510968	0.0332506	0.338293	0.30216	0.153875
18S	1057	A	251	508	759	1.68148	0.29899	0.627379	241	785	1026	1.2989	0.138486	0.565248	263	335	598	1.52144	0.259379	0.603802	0.59881	0.0256093		393	1040	1433	2.04321	0.334538	0.671554	682	1038	1720	1.25661	0.208785	0.557002	680	869	1549	1.04486	0.187383	0.51113	0.579895	0.0674636
18S	1058	U	437	660	1097	1.02877	0.201032	0.507318	400	517	917	1.8845	0.315674	0.653566	405	396	801	0.985218	0.164461	0.496589	0.552491	0.0716048		595	1355	1950	1.2965	0.23157	0.564681	916	825	1741	1.392	0.270177	0.58208	794	829	1623	1.10796	0.245284	0.525761	0.557507	0.0235452
18S	1059	C	2771	845	3616	0.37755	0	0	2333	1439	3772	0.295374	0	0	1800	612	2412	0.358544	0	0	0	0		3335	2751	6086	0.295265	0	0	3167	2354	5521	0.255443	0	0	3343	1783	5126	0.347981	0	0	0	0
18S	1060	A	1836	756	2592	0.0838197	0	0.0773648	2134	942	3076	0.0559094	0	0.0529654	1465	375	1840	0.00215463	0	0.00215116	0.0441605	0.0313307		2375	3361	5736	0.179116	0	0	2658	1707	4365	0.120629	0	0.107666	2647	1607	4254	0.0416373	0	0	0.0358887	0.0507543
18S	1061	G	1424	859	2283	0.376168	0	0.273431	1727	627	2354	0.551286	0	0.355471	1003	375	1378	0.483619	0	0.326132	0.318345	0.0339421		1681	3412	5093	0.0498102	0	0	3036	2044	5080	0.0257583	0	0.0251163	2505	1533	4038	0.10965	0	0.0988373	0.0413178	0.041945
18S	1062	A	1778	607	2385	0.406194	0	0.288946	1906	802	2708	0.407387	0	0.289539	1150	570	1720	0.219343	0	0.179972	0.252819	0.0515114		1849	2045	3894	0.261044	0	0.207048	2775	1963	4738	0.164868	0	0.14156	2179	1519	3698	0.299745	0	0.230666	0.193091	0.0376926
18S	1063	U	3536	1255	4791	0.299144	0	0	3999	2207	6206	0.39321	0	0	2467	1078	3545	0.425002	0	0	0	0		3720	3730	7450	0.366231	0	0	5497	3899	9396	0.419935	0	0	4318	2417	6735	0.262281	0	0	0	0
18S	1064	A	2448	1397	3845	0.0522419	0	0	2668	1831	4499	0.0703679	0	0	1359	724	2083	0.0994029	0	0.0904548	0.0301516	0.0426408		2143	2101	4244	0.217542	0	0.178708	3460	1732	5192	0.191859	0	0.161	3125	1383	4508	0.220719	0	0.180844	0.173517	0.00889361
18S	1065	C	3355	1741	5096	0.286057	0	0	3290	2480	5770	0.260933	0	0	1875	967	2842	0.192285	0	0	0	0		3773	3627	7400	0.346955	0	0	4863	2242	7105	0.116642	0	0	4034	1666	5700	0.00458204	0	0	0	0
18S	1066	C	5156	1558	6714	0.495903	0	0	5079	2899	7978	0.491093	0	0	2598	1243	3841	0.443091	0	0	0	0		4772	2930	7702	0.407452	0	0	8014	3286	11300	0.488896	0	0	6099	4527	10626	0.515646	0	0	0	0
18S	1067	G	2855	831	3686	0.0223669	0	0	2541	1102	3643	0.225015	0	0.183725	1502	571	2073	0.0896925	0	0.0823463	0.0886904	0.0751394		2134	975	3109	0.536242	0.0476775	0.349134	3753	737	4490	0.435926	0	0.303632	2960	2210	5170	0.0923526	0	0.0845597	0.245775	0.1155
18S	1068	U	1603	1352	2955	0.18716	0	0.157698	1622	1399	3021	0.466755	0	0.318295	851	795	1646	0.348533	0	0.25857	0.244854	0.0662766		1583	1120	2703	0.666071	0.0500365	0.399874	2209	2091	4300	0.456506	0	0.313476	1984	2824	4808	0.142866	0	0.12503	0.27946	0.114754
18S	1069	C	2878	1081	3959	0.198423	0	0	3461	1459	4920	0.179774	0	0	1512	1066	2578	0.225902	0	0	0	0		3379	1449	4828	0.172288	0	0	5449	2807	8256	0.325663	0	0	4216	3784	8000	0.392366	0	0	0	0
18S	1070	G	1378	560	1938	0.589726	0.0569704	0.371081	1088	1529	2617	0.509087	0	0.337433	679	569	1248	0.564692	0.0251721	0.361081	0.356532	0.0141084		1352	1105	2457	0.612612	0.0322316	0.379984	2285	1518	3803	0.496308	0	0.331747	1133	2478	3611	0.368519	0	0.269337	0.327023	0.0452946
18S	1071	U	1739	1033	2772	0.0241656	0	0	1782	2337	4119	0.142093	0	0	1152	1162	2314	0.256295	0	0	0	0		2068	1651	3719	0.013862	0	0	3185	3353	6538	0.199523	0	0	1957	3449	5406	0.184623	0	0	0	0
18S	1072	A	1327	1071	2398	0.00490945	0	0	1725	2885	4610	0.326283	0	0	855	876	1731	0.0632538	0	0	0	0		1975	1797	3772	0.124242	0	0	2810	2357	5167	0.0232134	0	0	1791	2937	4728	0.153331	0	0	0	0
18S	1073	G	563	800	1363	0.527224	0.0835011	0.345383	727	1390	2117	0.372915	0.0127575	0.271716	394	487	881	0.702595	0.141545	0.412936	0.343345	0.0576709		843	1667	2510	0.234364	0	0.189928	1479	2065	3544	0.328995	0	0.247605	831	1160	1991	0.804769	0.138746	0.446037	0.294523	0.109693
18S	1074	U	198	988	1186	0.588627	0.0709838	0.370722	501	1799	2300	0.151123	0	0.131332	303	575	878	0.616736	0.086387	0.381739	0.294598	0.115534		777	1277	2054	0.515534	0.0441846	0.340276	1074	2393	3467	0.325996	0	0.245904	564	1511	2075	0.531369	0	0.347099	0.311093	0.0461797
18S	1075	U	75	1183	1258	0.373268	0	0.271967	437	1404	1841	0.384341	0	0.277743	212	795	1007	0.359006	0	0.264361	0.271357	0.00548038		712	1366	2078	0.493197	0.0398043	0.330402	1219	1888	3107	0.474392	0.0478541	0.321825	437	1212	1649	0.751731	0.0144314	0.429285	0.360504	0.0487612
18S	1076	C	498	1263	1761	0.166175	0	0	939	1106	2045	0.0900945	0	0.0826854	464	798	1262	0.0210874	0	0	0.0275618	0.0389783		1819	2496	4315	0.376884	0	0	2949	1885	4834	0.159956	0	0	1081	1334	2415	0.0305923	0	0	0	0
18S	1077	C	584	1041	1625	0.149112	0	0	933	1562	2495	0.195406	0	0	660	812	1472	0.185962	0	0	0	0		1886	1768	3654	0.255455	0	0	4157	1334	5491	0.290315	0	0	1715	1054	2769	0.254184	0	0	0	0
18S	1078	G	448	574	1022	0.300978	0	0.231521	536	787	1323	0.4417	0	0.306535	522	545	1067	0.109831	0	0.0990459	0.212367	0.0857831		1195	993	2188	0.268722	0	0.211882	2853	498	3351	0.16901	0	0.144612	880	440	1320	0.48968	0.0206648	0.328882	0.228459	0.0761354
18S	1079	A	370	492	862	0.45374	0.0773665	0.312368	491	588	1079	0.572737	0.082206	0.36438	397	405	802	0.472963	0.0740034	0.321368	0.332705	0.0226968		1179	819	1998	0.342549	0	0.255243	2254	1166	3420	0.0921271	0	0.0843782	598	549	1147	0.554849	0.107025	0.357051	0.232224	0.112502
18S	1080	C	765	512	1277	0.073196	0	0	948	498	1446	0.0858558	0	0.0791178	672	726	1398	0.189048	0	0	0.0263726	0.0372965		1783	1332	3115	0.177364	0	0	3512	367	3879	0.0809708	0	0	958	343	1301	0.324603	0.0147073	0.245199	0.081733	0.115588
18S	1081	C	791	663	1454	0.181176	0	0	906	1418	2324	0.371331	0	0	804	728	1532	0.221845	0	0	0	0		1899	1074	2973	0.0984458	0	0	3642	914	4556	0.238517	0	0	1049	666	1715	0.0140637	0	0.0138766	0.00462555	0.00654151
18S	1082	A	523	450	973	0.294741	0	0.227825	496	498	994	0.608409	0.0477335	0.378504	450	391	841	0.54071	0.0801947	0.351219	0.319183	0.0655528		1027	922	1949	0.462507	0.0515108	0.316354	1798	902	2700	0.346695	0.0485857	0.257512	703	872	1575	0.130393	0	0.115417	0.229761	0.0843464
18S	1083	U	468	334	802	0.627785	0.116197	0.385963	479	605	1084	0.508326	0	0.337219	580	651	1231	0.0578193	0	0.0547009	0.259295	0.146032		1090	1002	2092	0.309715	0	0.236561	1762	1186	2948	0.191647	0	0.160871	578	528	1106	0.696136	0.0982985	0.410643	0.269359	0.104573
18S	1084	A	438	700	1138	0.220144	0	0.180555	472	710	1182	0.513224	0	0.339349	510	737	1247	0.131232	0	0.11609	0.211998	0.0938176		1180	1134	2314	0.178181	0	0.151289	1691	1467	3158	0.0981675	0	0.0894179	617	1329	1946	0.0162244	0	0.0159734	0.0855602	0.0553098
18S	1085	A	306	708	1014	0.489305	0.0515129	0.328763	344	747	1091	0.762424	0.0463303	0.432824	368	638	1006	0.476696	0.00730684	0.32303	0.361539	0.0504606		889	1254	2143	0.31633	0.0221981	0.240397	1281	1382	2663	0.311941	0.00716389	0.237839	477	1264	1741	0.255785	0	0.203779	0.227338	0.0166918
18S	1086	A	253	972	1225	0.363196	0.0334984	0.266589	351	874	1225	0.709081	0.0784061	0.415088	386	784	1170	0.332128	0	0.249481	0.310386	0.0743642		1016	2124	3140	0.0891896	0	0	1010	1231	2241	0.650471	0.12557	0.394219	480	1162	1642	0.493291	0.0469907	0.330473	0.241564	0.172783
18S	1087	C	511	1429	1940	0.101225	0	0	525	2200	2725	0.21758	0	0	596	1624	2220	0.325039	0	0	0	0		2019	2392	4411	0.35236	0	0	1699	2697	4396	0.156349	0	0	1000	2440	3440	0.242194	0	0	0	0
18S	1088	G	280	1356	1636	0.165038	0	0.141733	330	1564	1894	0.243366	0	0.195814	308	1021	1329	0.242038	0	0.19499	0.177512	0.0253022		1486	1850	3336	0.0887257	0	0	992	2529	3521	0.0909994	0	0.083431	419	1510	1929	0.563247	0.0271812	0.360425	0.147952	0.154054
18S	1089	A	257	1848	2105	0.0413158	0	0	365	2621	2986	0.199081	0	0	180	1829	2009	0.192753	0	0	0	0		1135	1191	2326	0.405567	0.0264571	0.288632	955	3100	4055	0.0232413	0	0	493	2225	2718	0.152854	0	0.13263	0.140421	0.117962
18S	1090	U	66	3252	3318	0.375816	0	0	130	4775	4905	0.529621	0	0	84	2955	3039	0.495972	0	0	0	0		531	2693	3224	0.0144393	0	0.0142381	759	4547	5306	0.244727	0	0	544	4840	5384	0.433826	0	0	0.00474603	0.00671191
18S	1091	G	51	1946	1997	0.169358	0	0.144892	74	2125	2199	0.26051	0	0.206745	62	1085	1147	0.535869	0.0387589	0.349101	0.233579	0.0855		154	2535	2689	0.28879	0.0161484	0.224143	163	2261	2424	0.884765	0.14315	0.469533	76	2942	3018	0.147356	0	0.128468	0.274048	0.143641
18S	1092	C	121	2966	3087	0.249982	0	0	206	2679	2885	0.0476515	0	0	167	1576	1743	0.0310015	0	0	0	0		752	3227	3979	0.141778	0	0	678	5102	5780	0.254652	0	0	347	3619	3966	0.128216	0	0	0	0
18S	1093	C	179	2494	2673	0.0781767	0	0	284	3199	3483	0.228495	0	0	187	1534	1721	0.0377404	0	0	0	0		1522	3256	4778	0.290581	0	0	1005	6337	7342	0.428708	0	0	572	5313	5885	0.448409	0	0	0	0
18S	1094	G	195	1973	2168	0.212658	0	0.175432	329	2176	2505	0.127782	0	0.113344	244	1424	1668	0.0324546	0	0	0.0962587	0.0726316		1319	1736	3055	0.198978	0	0.166002	1347	1613	2960	0.581072	0.0465146	0.367596	714	2757	3471	0.00132489	0	0	0.177866	0.150305
18S	1095	A	276	2223	2499	0.0588267	0	0.0555793	549	1546	2095	0.3787	0.00645207	0.274774	255	929	1184	0.381585	0.0191137	0.276362	0.202239	0.103706		1569	1772	3341	0.0762318	0	0.0708518	1372	2861	4233	0.0799559	0	0.0740525	820	2079	2899	0.217318	0	0.178573	0.107826	0.0500427
18S	1096	C	316	2766	3082	0.152708	0	0	899	1489	2388	0.190652	0	0.16018	356	1211	1567	0.0197562	0	0	0.0533934	0.0755096		1942	1461	3403	0.069278	0	0.0648073	1793	3142	4935	0.0811476	0	0	1031	2155	3186	0.0846076	0	0.0780301	0.0476125	0.0340971
18S	1097	U	242	1901	2143	0.245237	0.00580399	0.197014	901	2560	3461	0.241055	0	0	451	1139	1590	0.0861932	0	0	0.0656713	0.0928733		2325	1794	4119	0.117843	0	0	2308	3533	5841	0.228868	0	0	1440	1657	3097	0.0676709	0	0.063401	0.0211337	0.0298875
18S	1098	G	580	1780	2360	0.092842	0	0.0849876	1200	780	1980	0.379943	0	0.275433	730	557	1287	0.123602	0	0.110082	0.156834	0.0844856		2479	872	3351	0.113196	0	0.101713	1699	1807	3506	0.371638	0.00819286	0.271001	1230	1623	2853	0.119108	0	0.106464	0.159726	0.0787071
18S	1099	G	621	2205	2826	0.15058	0	0	1107	680	1787	0.503443	0.00795222	0.334985	527	496	1023	0.390636	0.0257771	0.281102	0.205362	0.14687		1419	2605	4024	0.110763	0	0	1604	1357	2961	0.651692	0.106395	0.394641	810	1056	1866	0.712254	0.112532	0.416105	0.270248	0.191295
18S	1100	C	1290	2462	3752	0.423996	0	0	1470	2420	3890	0.39709	0	0	983	895	1878	0.32266	0	0	0	0		2881	2475	5356	0.391643	0	0	2298	2014	4312	0.0881985	0	0.0810673	1171	2037	3208	0.119324	0	0	0.0270224	0.0382155
18S	1101	G	1234	1170	2404	0.0936752	0	0	989	1819	2808	0.159333	0	0	688	538	1226	0.0494884	0	0.0471914	0.0157305	0.0222462		1291	754	2045	0.73682	0.133779	0.424354	1940	2835	4775	0.00985948	0	0	1060	2208	3268	0.177248	0	0	0.141451	0.200043
18S	1102	A	1646	949	2595	0.232229	0	0	1456	1711	3167	0.300922	0	0	854	581	1435	0.145675	0	0	0	0		1574	1417	2991	0.110305	0	0.0993767	2153	3122	5275	0.0915845	0	0	1260	2194	3454	0.234752	0	0	0.0331256	0.0468466
18S	1103	U	874	1300	2174	0.143857	0	0	823	2229	3052	0.319922	0	0	486	1225	1711	0.337623	0	0	0	0		490	4085	4575	0.354383	0	0	1104	5847	6951	0.348025	0	0	888	2554	3442	0.262659	0	0	0	0
18S	1104	G	234	536	770	1.41882	0.323915	0.58689	305	574	879	1.35563	0.229694	0.575763	139	404	543	1.17696	0.266328	0.541101	0.567918	0.0194991		68	2743	2811	0.0387862	0	0.0373507	378	3068	3446	0.368636	0	0.269403	103	1214	1317	0.984901	0.172128	0.496386	0.267713	0.187404
18S	1105	C	199	774	973	0.723933	0.103364	0.420181	381	1326	1707	0.0684686	0	0.0641162	42	943	985	0.092833	0	0.085026	0.189775	0.163146		133	2635	2768	0.0172866	0	0	258	6018	6276	0.311927	0	0	107	2706	2813	0.181446	0	0	0	0
18S	1106	G	458	422	880	0.702106	0.0258157	0.412768	631	1061	1692	0.0226751	0	0	231	756	987	0.0272155	0	0.0265205	0.146429	0.188641		392	1702	2094	0.197804	0	0.165205	955	4459	5414	0.222477	0	0	803	1336	2139	0.0545742	0	0.051773	0.072326	0.0689927
18S	1107	G	401	498	899	0.414691	0	0.293362	445	418	863	0.719586	0.0454493	0.418746	227	605	832	0.12501	0	0.111238	0.274449	0.12625		320	2015	2335	0.0823963	0	0	751	2597	3348	0.223596	0	0.182781	580	701	1281	0.672205	0.00825668	0.402175	0.194985	0.164414
18S	1108	C	653	563	1216	0.0919931	0	0	568	666	1234	0.0302654	0	0.0293994	382	581	963	0.0834832	0	0	0.00979981	0.013859		312	1888	2200	0.0894089	0	0	715	4892	5607	0.383745	0	0	1115	1978	3093	0.43273	0	0	0	0
18S	1109	G	539	1092	1631	0.438501	0	0	540	637	1177	0.0785606	0	0	307	680	987	0.171772	0	0	0	0		364	926	1290	0.464928	0.0284491	0.317541	736	2327	3063	0.0891464	0	0.0818743	830	1167	1997	0.150017	0	0	0.133138	0.134608
18S	1110	G	338	715	1053	0.185357	0	0	264	183	447	1.21337	0.211662	0.548753	233	345	578	0.362809	0.0194423	0.26656	0.271771	0.224058		326	1082	1408	0.1558	0	0.134881	560	1028	1588	0.903965	0.119267	0.474937	384	522	906	0.795614	0.109049	0.44336	0.351059	0.153404
18S	1111	C	602	434	1036	0.228662	0	0	692	338	1030	0.165406	0	0	483	352	835	0.117969	0	0	0	0		663	936	1599	0.0841458	0	0	1177	1864	3041	0.155797	0	0	956	425	1381	0.0757276	0	0.070444	0.0234813	0.0332076
18S	1112	G	269	311	580	0.330465	0.00546658	0.248705	321	179	500	0.65316	0.0370639	0.395576	204	215	419	0.759127	0.150486	0.432121	0.3588	0.0792662		316	338	654	1.19506	0.282178	0.544811	537	365	902	1.67443	0.297781	0.626348	579	306	885	0.576298	0.0323006	0.365864	0.512341	0.108792
18S	1113	U	251	145	396	0.826784	0.146089	0.453215	331	306	637	0.146534	0	0.127981	305	287	592	0.148435	0	0.12944	0.236879	0.152974		359	501	860	0.593328	0.0798714	0.372655	567	93	660	2.22526	0.376666	0.690272	620	44	664	1.02053	0.149828	0.505458	0.522795	0.130245
18S	1114	U	302	248	550	0.16703	0	0.143347	399	652	1051	0.368093	0	0	418	555	973	0.374926	0	0	0.0477822	0.0675743		310	843	1153	0.149759	0	0.130351	516	845	1361	0.392927	0	0.282236	650	713	1363	0.0651678	0	0	0.137529	0.115334
18S	1115	A	242	203	445	0.311485	0	0.237912	310	284	594	0.134809	0	0.11897	175	466	641	0.0520249	0	0	0.118961	0.0971272		349	570	919	0.456848	0.0611611	0.313821	297	1328	1625	0.00453738	0	0.00451965	546	851	1397	0.148204	0	0	0.106113	0.146883
18S	1116	U	149	176	325	0.590048	0.0740429	0.371805	183	232	415	0.667094	0.0433237	0.400732	191	346	537	0.105143	0	0.0952996	0.289279	0.137671		213	1274	1487	0.0454226	0	0	224	1466	1690	0.0796767	0	0	468	529	997	0.274182	0	0.215352	0.071784	0.101518
18S	1117	U	107	232	339	0.385261	0.00339851	0.278706	155	225	380	0.829921	0.0876266	0.45418	116	329	445	0.306652	0	0.235089	0.322658	0.0946892		226	1153	1379	0.0627295	0	0.059067	176	1438	1614	0.0383488	0	0	363	552	915	0.466363	0.0517041	0.318278	0.125782	0.138235
18S	1118	C	141	161	302	0.413458	0.0341274	0.2932	217	317	534	0.203531	0	0.169374	162	249	411	0.326321	0	0.246486	0.236353	0.0510568		224	863	1087	0.416503	0	0.294227	285	1372	1657	0.113946	0	0	543	473	1016	0.329018	0	0.247748	0.180658	0.129146
18S	1119	C	213	214	427	0.0772066	0	0	352	228	580	0.13821	0	0.121611	246	284	530	0.0287089	0	0	0.0405371	0.0573282		304	1577	1881	0.198453	0	0	463	1111	1574	0.0629982	0	0	898	440	1338	0.0316654	0	0.0307157	0.0102386	0.0144795
18S	1120	C	211	252	463	0.162356	0	0	392	475	867	0.26723	0	0	334	204	538	0.0824572	0	0	0	0		495	1695	2190	0.313855	0	0	585	1148	1733	0.16609	0	0	1342	623	1965	0.302532	0	0	0	0
18S	1121	A	330	198	528	0.296387	0	0	450	261	711	0.0981586	0	0	326	159	485	0.0491998	0	0	0	0		418	1114	1532	0.0267304	0	0.0260511	610	974	1584	0.108314	0	0	976	588	1564	0.0994746	0	0	0.00868369	0.0122806
18S	1122	U	290	214	504	0.273817	0	0	451	816	1267	0.545452	0	0	420	304	724	0.434958	0	0	0	0		903	2486	3389	0.608345	0	0	636	1047	1683	0.223535	0	0	1655	677	2332	0.453546	0	0	0	0
18S	1123	G	164	221	385	0.00279217	0	0	202	212	414	0.64664	0.0163967	0.393278	164	172	336	0.300264	0.0158122	0.231453	0.208244	0.161392		376	668	1044	0.470952	0	0.320376	379	871	1250	0.0434497	0	0.0416723	806	719	1525	0.109626	0	0	0.120683	0.142226
18S	1124	A	45	146	191	1.0934	0.252092	0.523612	93	157	250	1.81965	0.340614	0.64626	125	98	223	0.927232	0.20338	0.482238	0.550703	0.0696479		266	1099	1365	0.0358712	0	0.0346535	152	1146	1298	0.0177744	0	0	421	630	1051	0.314639	0	0.239508	0.0913871	0.105688
18S	1125	C	89	138	227	0.813353	0.164077	0.449623	143	676	819	0.16439	0	0	119	162	281	0.543972	0.0283072	0.353131	0.267585	0.193268		390	520	910	0.577741	0.024834	0.366437	309	428	737	0.821906	0.16418	0.45146	804	641	1445	0.0766636	0	0	0.272632	0.19588
18S	1126	C	202	178	380	0.215456	0	0.177647	272	387	659	0.211869	0	0.175047	212	206	418	0.077433	0	0.0720276	0.141574	0.0491882		521	421	942	0.464628	0	0.317463	425	296	721	0.947876	0.155306	0.486967	833	456	1289	0.056615	0	0.0536208	0.286017	0.178305
18S	1127	C	215	199	414	0.306265	0	0.234892	267	400	667	0.288057	0	0.223897	174	225	399	0.210444	0	0.174217	0.211002	0.0263954		338	591	929	0.564827	0	0.3612	385	584	969	0.5189	0.0256005	0.341861	569	282	851	0.607577	0.071087	0.378222	0.360428	0.0148543
18S	1128	G	159	191	350	0.930294	0	0.482657	300	216	516	0.968429	0.0492788	0.492465	181	155	336	0.733696	0	0.423923	0.466348	0.030265		170	597	767	1.15407	0	0.536086	338	240	578	2.02456	0.35428	0.669756	180	347	527	1.7037	0.336266	0.630579	0.61214	0.0561067
18S	1129	C	301	213	514	0.520194	0	0.342627	322	345	667	0.693197	0.056401	0.409764	224	201	425	0.488159	0	0.328547	0.360312	0.0354365		607	591	1198	0.332351	0	0.249603	590	966	1556	0.195197	0	0.163406	527	692	1219	0.10816	0	0.0976757	0.170228	0.0622115
18S	1130	C	157	168	325	1.92096	0.355346	0.658338	177	440	617	1.09399	0.231083	0.522848	160	108	268	1.72268	0.32135	0.633579	0.604922	0.0589087		650	239	889	0.964769	0.082077	0.491315	646	1268	1914	0.0596287	0	0.0563009	616	365	981	0.429803	0.0488979	0.300817	0.282811	0.17805
18S	1131	G	506	140	646	0.699571	0.189819	0.411991	751	658	1409	0.0248621	0	0.0242758	560	187	747	0.0513815	0	0.0489326	0.161733	0.177245		1224	417	1641	0.0726215	0	0.0677431	1252	936	2188	0.0357799	0	0.0345592	1108	606	1714	0.168358	0	0	0.0341008	0.0276579
18S	1132	G	500	1091	1591	0.255011	0	0	659	1591	2250	0.308658	0	0	389	730	1119	0.245645	0	0	0	0		994	759	1753	0.0496959	0	0.0473689	1027	1696	2723	0.102296	0	0	606	1551	2157	0.328669	0	0	0.0157896	0.0223299
18S	1133	G	365	1270	1635	0.180155	0	0	593	981	1574	0.160233	0	0.13818	303	617	920	0.0218724	0	0.021427	0.0532022	0.0607215		651	3246	3897	0.561134	0	0	1043	1910	2953	0.0936207	0	0	520	952	1472	0.0932866	0	0.0853797	0.0284599	0.0402484
18S	1134	C	474	1759	2233	0.368029	0	0	882	1736	2618	0.281846	0	0	533	1328	1861	0.52116	0	0	0	0		802	3643	4445	0.609702	0	0	1698	2977	4675	0.429954	0	0	740	1238	1978	0.16606	0	0	0	0
18S	1135	A	542	1220	1762	0.119159	0	0	1080	1398	2478	0.185285	0	0	351	794	1145	0.11083	0	0	0	0		583	1158	1741	0.200281	0	0.166941	1606	2112	3718	0.214544	0	0	827	1100	1927	0.0710639	0	0	0.0556471	0.0786969
18S	1136	G	716	1078	1794	0.11771	0	0	1214	551	1765	0.234856	0	0.190276	429	538	967	0.0884986	0	0.0813806	0.0905523	0.0779502		355	1079	1434	0.440991	0	0.306181	1574	1030	2604	0.160853	0	0.13861	566	604	1170	0.641892	0.136407	0.39115	0.278647	0.104921
18S	1137	C	1162	898	2060	0.237625	0	0	2042	1038	3080	0.32739	0	0	682	641	1323	0.218337	0	0	0	0		637	754	1391	0.441731	0	0.306542	1791	1919	3710	0.236414	0	0	1359	883	2242	0.174652	0	0	0.102181	0.144505
18S	1138	U	1334	838	2172	0.304019	0	0	1963	861	2824	0.271032	0	0	647	556	1203	0.145496	0	0	0	0		455	481	936	1.07912	0.0383812	0.519293	1446	1181	2627	0.0776129	0	0.0720484	1124	827	1951	0.0468693	0	0	0.197114	0.229706
18S	1139	U	1045	663	1708	0.155178	0	0	1682	728	2410	0.179382	0	0	476	412	888	0.137245	0	0.120802	0.0402672	0.0569465		431	1546	1977	0.139125	0	0	1485	1848	3333	0.23287	0	0	946	1088	2034	0.112831	0	0	0	0
18S	1140	C	1140	526	1666	0.221396	0	0	1701	597	2298	0.192804	0	0	567	296	863	0.104823	0	0.0949768	0.0316589	0.0447725		455	1766	2221	0.35043	0	0	1409	1383	2792	0.149759	0	0	1130	907	2037	0.137248	0	0	0	0
18S	1141	C	567	443	1010	0.168062	0	0.144003	978	585	1563	0.100355	0	0.0912556	408	436	844	0.00312952	0	0.00312344	0.0794608	0.0581155		260	1784	2044	0.405314	0	0	1273	1245	2518	0.186692	0	0	1196	1382	2578	0.378174	0	0	0	0
18S	1142	G	470	225	695	0.513649	0.0634835	0.339667	1077	322	1399	0.0889127	0	0.0817063	294	358	652	0.234167	0	0.189973	0.203782	0.105764		178	802	980	0.255748	0	0.203827	810	265	1075	0.778779	0.15935	0.438046	851	716	1567	0.0247945	0	0.0242097	0.222028	0.169437
18S	1143	G	578	178	756	0.176633	0	0.150286	942	320	1262	0.0852292	0	0.078593	725	186	911	0.196784	0	0	0.076293	0.0613755		488	282	770	0.528318	0.0529957	0.34598	1063	419	1482	0.106114	0	0.0959924	885	771	1656	0.0767787	0	0	0.147324	0.145835
18S	1144	G	320	126	446	0.69913	0.059022	0.412006	667	347	1014	0.138719	0	0.121926	610	158	768	0.125011	0	0	0.177977	0.172807		535	194	729	0.500502	0.0172561	0.333861	690	396	1086	0.296453	0	0.228827	551	514	1065	0.404513	0.0641066	0.288202	0.28363	0.0430017
18S	1145	A	276	135	411	0.467476	0	0.319085	550	213	763	0.26543	0	0.209972	489	115	604	0.0328742	0	0.0318789	0.186979	0.118374		508	144	652	0.602603	0.0554191	0.376375	618	320	938	0.303775	0	0.233187	575	733	1308	0.0589933	0	0.0557472	0.22177	0.131144
18S	1146	A	163	103	266	0.888681	0.0630225	0.471465	292	201	493	0.661853	0.080122	0.398748	264	134	398	0.51746	0.113997	0.341568	0.403927	0.0531563		452	217	669	0.41461	0	0.293401	396	230	626	0.671256	0.0557527	0.402031	429	420	849	0.634876	0.0983376	0.388612	0.361348	0.0483573
18S	1147	A	100	99	199	1.09872	0.176418	0.52477	150	97	247	1.85282	0.346126	0.650389	203	134	337	0.696252	0.14098	0.411182	0.52878	0.097697		380	357	737	0.141614	0	0.124195	228	188	416	1.16632	0.187202	0.538984	279	574	853	0.515353	0.00717783	0.340351	0.33451	0.169388
18S	1148	C	164	139	303	0.190753	0	0.160639	220	113	333	0.837658	0.0889896	0.456573	300	155	455	0.174756	0	0.149038	0.255417	0.142318		383	394	777	0.011511	0	0	314	196	510	0.522309	0.0705757	0.343545	305	398	703	0.742551	0.118695	0.426476	0.256674	0.184627
18S	1149	C	188	196	384	0.125916	0	0	373	214	587	0.111754	0	0	433	243	676	0.245298	0	0	0	0		684	367	1051	0.291191	0	0	424	350	774	0.0423369	0	0	453	720	1173	0.00780806	0	0	0	0
18S	1150	A	135	81	216	0.596467	0.0863892	0.374698	184	147	331	0.55492	0.0309703	0.357573	232	127	359	0.522932	0.0550425	0.343999	0.358757	0.0125608		461	209	670	0.232605	0	0.188938	352	222	574	0.312696	0	0.238525	350	1180	1530	0.259685	0	0	0.142488	0.102768
18S	1151	A	121	86	207	0.757585	0.146403	0.43222	168	140	308	0.628263	0.108456	0.386617	242	156	398	0.406934	0.0294174	0.289751	0.369529	0.0594046		420	300	720	0.227832	0	0.185766	333	328	661	0.155472	0	0.134729	278	1114	1392	0.160477	0	0	0.106832	0.0783621
18S	1152	A	130	135	265	0.429031	0.0782902	0.301017	201	190	391	0.273639	0.0350918	0.21528	318	171	489	0.200385	0	0.167219	0.227838	0.0553401		466	326	792	0.215006	0	0.177143	377	361	738	0.0673884	0	0.063214	452	1376	1828	0.393682	0	0	0.080119	0.0732995
18S	1153	G	121	278	399	0.00138889	0	0	105	469	574	0.114068	0	0	178	265	443	0.478879	0.0914731	0.324306	0.108102	0.152879		372	323	695	0.562771	0.0987793	0.360443	225	314	539	0.639218	0.154184	0.390394	201	434	635	0.986495	0.192891	0.496994	0.415944	0.0586014
18S	1154	U	115	284	399	0.0938611	0	0.0860037	173	423	596	0.0676903	0	0	281	315	596	0.171078	0.00954508	0.146295	0.0774329	0.0600313		586	190	776	0.552967	0.123026	0.356367	302	530	832	0.146259	0	0.12773	257	786	1043	0.194381	0	0.162877	0.215658	0.100526
18S	1155	C	215	302	517	0.12988	0	0	226	350	576	0.051762	0	0.0492958	475	320	795	0.101521	0	0	0.0164319	0.0232383		762	326	1088	0.163289	0	0.14048	505	696	1201	0.181697	0	0	394	859	1253	0.00627326	0	0	0.0468265	0.0662227
18S	1156	U	249	317	566	0.163179	0	0	293	429	722	0.149347	0	0	606	311	917	0.221181	0	0	0	0		1055	317	1372	0.0740957	0	0	605	625	1230	0.176947	0	0	544	986	1530	0.230576	0	0	0	0
18S	1157	U	247	409	656	0.210705	0	0	242	403	645	0.0493292	0	0.0470797	630	298	928	0.18908	0	0	0.0156932	0.0221936		1136	573	1709	0.229136	0	0	645	542	1187	0.113618	0	0	507	650	1157	0.003128	0	0.00312093	0.00104031	0.00147122
18S	1158	U	197	358	555	0.056295	0	0.0533856	226	409	635	0.157355	0	0.136146	571	407	978	0.198638	0	0	0.0631772	0.0560109		1072	785	1857	0.253468	0	0	575	529	1104	0.0140774	0	0	600	389	989	0.145084	0	0.126814	0.0422712	0.0597805
18S	1159	G	348	257	605	0.0438027	0	0.042031	344	424	768	0.00593845	0	0	879	261	1140	0.316788	0	0	0.0140103	0.0198136		1382	759	2141	0.350358	0	0	941	498	1439	0.277029	0	0	723	456	1179	0.121365	0	0	0	0
18S	1160	G	409	171	580	0.166571	0	0.142998	400	461	861	0.0756123	0	0	719	213	932	0.136156	0	0	0.047666	0.0674098		1562	647	2209	0.373474	0	0	890	785	1675	0.390162	0	0	566	910	1476	0.319905	0	0	0	0
18S	1161	G	293	185	478	0.596103	0.145411	0.373963	249	661	910	0.00159776	0	0.00159696	516	120	636	0.322676	0.0555658	0.244247	0.206602	0.154331		927	485	1412	0.0358418	0	0.0346253	490	606	1096	0.0480705	0	0.0459056	329	825	1154	0.0762193	0	0	0.0268436	0.019532
18S	1162	U	76	556	632	0.341039	0.0351213	0.25461	29	673	702	0.561656	0.00319619	0.359982	199	251	450	0.958857	0.22829	0.490053	0.368215	0.0962955		132	432	564	1.76767	0.368898	0.639094	37	696	733	0.798516	0.00539248	0.444323	24	571	595	1.02066	0.138643	0.505531	0.529649	0.0813233
18S	1163	U	137	840	977	0.0248921	0	0.0243118	130	892	1022	0.293092	0	0.226831	301	488	789	0.163376	0	0.140585	0.130576	0.0829807		385	981	1366	0.106559	0	0.0963616	138	652	790	1.05651	0	0.514055	89	552	641	1.18164	0.0406142	0.542016	0.384144	0.203813
18S	1164	C	104	913	1017	0.18759	0	0.158089	197	858	1055	0.482786	0	0.325802	245	673	918	0.0891065	0	0.081898	0.188596	0.101883		487	1175	1662	0.112193	0	0	227	685	912	1.11172	0.0128638	0.526725	280	521	801	1.03501	0.0459183	0.508914	0.345213	0.244211
18S	1165	C	73	877	950	0.457261	0	0.314008	89	791	880	1.01343	0.156751	0.503619	103	611	714	0.523419	0.00835092	0.343897	0.387175	0.083238		358	768	1126	0.353012	0	0.261079	168	326	494	3.62507	0.47959	0.78413	376	279	655	1.88223	0.299109	0.653392	0.5662	0.222257
18S	1166	G	78	813	891	0.74782	0.0949024	0.428133	123	941	1064	0.808075	0.118106	0.447158	99	545	644	0.816176	0.142502	0.449776	0.441689	0.00964487		378	463	841	0.860926	0.14615	0.462929	238	737	975	1.624	0.302736	0.619144	475	598	1073	1.00394	0.193831	0.501216	0.527763	0.0664798
18S	1167	G	374	1069	1443	0.134118	0	0.11833	264	2236	2500	0.245329	0	0	246	665	911	0.328058	0	0.247225	0.121852	0.10096		855	271	1126	0.358168	0.00394273	0.263887	570	1853	2423	0.105368	0	0.0953592	894	1098	1992	0.13752	0	0.120948	0.160065	0.0741528
18S	1168	G	932	948	1880	0.0768563	0	0	720	2199	2919	0.330772	0	0	636	707	1343	0.0427001	0	0	0	0		1358	469	1827	0.165263	0	0	1126	2624	3750	0.237507	0	0	1565	1276	2841	0.137786	0	0	0	0
18S	1169	G	2244	1113	3357	0.512004	0	0	1808	2684	4492	0.597898	0	0	1421	832	2253	0.443991	0	0	0	0		1917	689	2606	0.421694	0	0	3010	3442	6452	0.570667	0	0	3060	1814	4874	0.502147	0	0	0	0
18S	1170	G	2659	662	3321	0.506281	0	0	1868	1621	3489	0.462162	0	0	1712	601	2313	0.451239	0	0	0	0		1577	203	1780	0.110387	0	0	3611	1634	5245	0.422053	0	0	3114	1321	4435	0.413566	0	0	0	0
18S	1171	G	1688	393	2081	0.157632	0	0	1009	980	1989	0.0115578	0	0	1125	332	1457	0.052713	0	0	0	0		1425	134	1559	0.0337464	0	0.032665	2696	1455	4151	0.222974	0	0	2240	1079	3319	0.148163	0	0	0.0108883	0.0153985
18S	1172	A	1462	463	1925	0.11774	0	0	949	751	1700	0.104148	0	0.0943745	1021	548	1569	0.146016	0	0	0.0314582	0.0444886		1455	536	1991	0.218507	0	0	2280	1647	3927	0.177136	0	0	2754	1409	4163	0.347313	0	0	0	0
18S	1173	G	1122	275	1397	0.185487	0	0.156559	603	439	1042	0.724917	0.0749029	0.420496	835	261	1096	0.22835	0	0.186038	0.254364	0.118088		1014	386	1400	0.133762	0	0.118055	1918	884	2802	0.157993	0	0.136479	1542	682	2224	0.278212	0	0.217734	0.157423	0.0433048
18S	1174	U	1197	410	1607	0.052377	0	0	864	487	1351	0.167924	0	0.143871	1337	486	1823	0.328442	0	0	0.047957	0.0678215		1409	564	1973	0.240009	0	0	2404	864	3268	0.0701744	0	0	2517	585	3102	0.152175	0	0	0	0
18S	1175	A	662	154	816	0.823705	0.128435	0.451969	408	175	583	1.51513	0.1872	0.602816	553	260	813	0.535053	0.0611763	0.348836	0.467874	0.104295		605	672	1277	0.175152	0	0.149146	1318	446	1764	0.657507	0.104648	0.39682	1208	616	1824	0.404359	0.0236439	0.288044	0.278003	0.101362
18S	1176	U	456	146	602	1.22639	0.203081	0.551252	388	246	634	0.978093	0.0640366	0.494856	455	307	762	0.537003	0.0119284	0.349681	0.465263	0.0849098		430	342	772	0.931163	0.200401	0.482501	1257	353	1610	0.604987	0.0794877	0.377088	1040	408	1448	0.612269	0.0706422	0.379919	0.413169	0.0490384
18S	1177	G	850	168	1018	0.109268	0	0.0985921	709	274	983	0.0876016	0	0.080621	695	475	1170	0.122991	0	0	0.0597377	0.0428733		927	824	1751	0.243721	0	0	1764	602	2366	0.0617706	0	0	1710	674	2384	0.169932	0	0	0	0
18S	1178	G	676	70	746	0.437811	0	0.304782	576	101	677	0.547263	0.0211385	0.354035	444	127	571	0.818803	0.0940629	0.450621	0.369813	0.0605749		869	316	1185	0.137081	0	0.120644	1261	300	1561	0.348819	0	0.258734	974	230	1204	0.600037	0.0403422	0.375209	0.251529	0.10405
18S	1179	U	525	14	539	0.920576	0.155773	0.479786	434	123	557	0.884528	0.167311	0.46981	406	41	447	1.26622	0.201633	0.559287	0.502961	0.0400365		548	69	617	1.22098	0.249851	0.550149	1159	102	1261	0.570734	0.0711973	0.363538	890	77	967	0.802445	0.108463	0.445453	0.453047	0.0763726
18S	1180	U	1028	200	1228	0.251144	0	0	1164	224	1388	0.300248	0	0	869	324	1193	0.239801	0	0	0	0		1223	294	1517	0.171219	0	0	2231	404	2635	0.350067	0	0	1853	418	2271	0.352582	0	0	0	0
18S	1181	G	1105	174	1279	0.307613	0	0	876	218	1094	0.0708777	0	0	414	261	675	0.406377	0	0.289258	0.0964192	0.136357		730	433	1163	0.0894616	0	0.0821802	1047	270	1317	0.326817	0.00624444	0.246457	925	287	1212	0.184052	0	0.155551	0.161396	0.0671931
18S	1182	C	1151	228	1379	0.361771	0	0	1446	293	1739	0.43311	0	0	847	762	1609	0.45107	0	0	0	0		1060	867	1927	0.368263	0	0	1622	455	2077	0.203427	0	0	1370	511	1881	0.317405	0	0	0	0
18S	1183	A	741	124	865	0.0650372	0	0.0611319	976	107	1083	0.0160517	0	0	580	378	958	0.0120496	0	0.0119184	0.0243501	0.0264599		693	383	1076	0.225028	0	0.183832	1322	280	1602	0.0512095	0	0.0487438	958	352	1310	0.0286295	0	0	0.0775252	0.0777595
18S	1184	A	605	130	735	0.207609	0	0.172111	779	107	886	0.191432	0	0.160826	391	345	736	0.324529	0	0.245266	0.192734	0.0374301		590	484	1074	0.206749	0	0.17146	1097	289	1386	0.179821	0	0.152507	699	354	1053	0.121474	0	0.108408	0.144125	0.0264143
18S	1185	A	652	185	837	0.00232034	0	0.00231773	1023	163	1186	0.162155	0	0	555	413	968	0.0169705	0	0	0.000772576	0.00109259		694	676	1370	0.0724694	0	0	1245	398	1643	0.0545553	0	0	763	278	1041	0.0671678	0	0.0629969	0.020999	0.029697
18S	1186	G	430	182	612	0.371905	0	0.271409	739	180	919	0.096244	0	0.0878814	412	278	690	0.436372	0	0.304108	0.221133	0.095164		480	729	1209	0.0987511	0	0.0899435	951	265	1216	0.287282	0	0.223312	443	153	596	0.858385	0.164174	0.462315	0.258523	0.154045
18S	1187	C	384	570	954	0.224433	0	0	657	448	1105	0.146434	0	0	380	942	1322	0.319837	0	0	0	0		465	770	1235	0.0515552	0	0.0490653	875	524	1399	0.0420714	0	0.0404006	422	327	749	0.326919	0	0.246622	0.112029	0.0952371
18S	1188	U	522	421	943	0.246728	0	0	716	411	1127	0.189234	0	0	589	781	1370	0.341154	0	0	0	0		561	1317	1878	0.340264	0	0	953	1086	2039	0.32152	0	0	506	632	1138	0.196195	0	0	0	0
18S	1189	G	355	113	468	0.665411	0.0401824	0.40006	469	192	661	0.411262	0.0566059	0.291727	379	437	816	0.173467	0	0.147978	0.279922	0.10325		307	481	788	0.74505	0.152924	0.427261	744	744	1488	0.0182897	0	0	362	435	797	0.169577	0	0.145145	0.190802	0.177391
18S	1190	A	324	102	426	0.885376	0.0963674	0.470186	325	179	504	0.865677	0.185367	0.464494	285	408	693	0.388056	0	0.279859	0.404846	0.0884102		309	1026	1335	0.00431637	0	0.00430102	673	598	1271	0.179988	0	0.152635	314	553	867	0.0732207	0	0.0682985	0.0750783	0.0607467
18S	1191	A	329	119	448	0.883841	0.111166	0.469725	254	211	465	1.0381	0.230122	0.509884	266	342	608	0.606933	0.0674469	0.378083	0.452564	0.055159		304	983	1287	0.0666235	0	0.0625076	522	371	893	0.774087	0.162188	0.436605	215	403	618	0.657763	0.103664	0.397165	0.298759	0.167829
18S	1192	A	322	235	557	0.656173	0.0559632	0.396627	334	407	741	0.267296	0	0.211143	303	380	683	0.449789	0.0198701	0.310558	0.306109	0.0757892		333	1050	1383	0.00370906	0	0.00369801	681	333	1014	0.668528	0.105423	0.400906	321	422	743	0.588053	0	0.370612	0.258405	0.180529
18S	1193	C	231	326	557	0.933055	0.1517	0.483132	307	790	1097	0.107296	0	0	313	631	944	0.110958	0	0.0999714	0.194368	0.208226		315	706	1021	0.505175	0.0585004	0.335844	831	495	1326	0.442167	0	0.306759	434	553	987	0.407344	0	0.28965	0.310751	0.0190686
18S	1194	U	230	889	1119	0.019256	0	0.0189087	324	752	1076	0.0238213	0	0	349	727	1076	0.013061	0	0.0129044	0.0106044	0.00788892		328	1208	1536	0.020668	0	0.0202624	798	839	1637	0.290368	0	0.225134	382	548	930	0.722831	0.103058	0.419822	0.221739	0.163137
18S	1195	U	340	1528	1868	0.371452	0	0	470	951	1421	0.243866	0	0	540	1093	1633	0.337223	0	0	0	0		494	1603	2097	0.26709	0	0	1157	1437	2594	0.135115	0	0	481	1159	1640	0.0458799	0	0.0438928	0.0146309	0.0206913
18S	1196	A	233	886	1119	0.245139	0	0.197018	274	722	996	0.237613	0	0.192149	315	508	823	0.529436	0.0300695	0.346439	0.245202	0.0716132		394	1033	1427	0.202326	0	0.168377	781	1136	1917	0.362548	0	0.266183	413	937	1350	0.458278	0.0454534	0.314419	0.24966	0.0607554
18S	1197	A	169	1063	1232	0.25688	0	0.204511	170	708	878	0.561067	0.107288	0.359675	282	561	843	0.617536	0.111142	0.382055	0.315414	0.0789504		291	1067	1358	0.333301	0.0232943	0.25012	666	1355	2021	0.437856	0.075034	0.304625	346	1646	1992	0.0712717	0	0.0665611	0.207102	0.101838
18S	1198	A	242	1724	1966	0.154217	0	0	481	857	1338	0.110821	0	0.0998318	348	919	1267	0.155783	0	0.134878	0.0782366	0.0571418		366	1273	1639	0.19685	0	0.164557	1071	2333	3404	0.0874694	0	0	594	2943	3537	0.35852	0	0	0.0548523	0.0775729
18S	1199	G	994	1586	2580	0.332657	0	0	1129	850	1979	0.236953	0	0	1077	1016	2093	0.296307	0	0	0	0		1254	1609	2863	0.301369	0	0	2220	2687	4907	0.347412	0	0	1058	2731	3789	0.352656	0	0	0	0
18S	1200	G	869	1157	2026	0.0718413	0	0	1004	717	1721	0.0625694	0	0	894	936	1830	0.140609	0	0	0	0		826	1445	2271	0.00621577	0	0	1905	2086	3991	0.119517	0	0	816	2033	2849	0.0477895	0	0	0	0
18S	1201	A	783	962	1745	0.130031	0	0.115127	1029	529	1558	0.099273	0	0.0903606	819	897	1716	0.038575	0	0	0.0684957	0.0494778		933	758	1691	0.479242	0.0624781	0.324108	2063	2194	4257	0.138362	0	0	848	1831	2679	0.089063	0	0.0818075	0.135305	0.137618
18S	1202	A	1037	601	1638	0.238628	0	0.19275	1337	612	1949	0.107584	0	0	960	678	1638	0.0285879	0	0.0278098	0.0735199	0.0850694		1446	577	2023	0.355528	0.00364509	0.262376	2480	1808	4288	0.126598	0	0	1143	1503	2646	0.142908	0	0.12508	0.129152	0.107153
18S	1203	U	1408	956	2364	0.159093	0	0	1375	633	2008	0.104225	0	0	1124	778	1902	0.102493	0	0	0	0		1594	681	2275	0.286897	0.000281434	0.223013	2546	1548	4094	0.0649328	0	0	1372	1631	3003	0.00806702	0	0.00800511	0.0770061	0.103294
18S	1204	U	1654	1286	2940	0.352994	0	0	1728	954	2682	0.353145	0	0	1371	1087	2458	0.329606	0	0	0	0		2975	858	3833	0.253521	0	0	3038	1608	4646	0.191851	0	0	1810	2456	4266	0.329417	0	0	0	0
18S	1205	G	1087	792	1879	0.0314184	0	0.0304771	978	577	1555	0.173907	0	0.148225	927	707	1634	0.034543	0	0.0334094	0.0707039	0.0548289		2269	1316	3585	0.184378	0	0	1995	1392	3387	0.112079	0	0.10081	1231	1617	2848	0.00624391	0	0.00620733	0.0356723	0.0461287
18S	1206	A	853	805	1658	0.110957	0	0.0999294	1013	621	1634	0.109161	0	0.0984717	1050	427	1477	0.0841603	0	0.0776756	0.0920256	0.0101644		2616	777	3393	0.140562	0	0	1741	1549	3290	0.0820318	0	0.075834	1225	1370	2595	0.0395994	0	0.0381051	0.0379797	0.0309592
18S	1207	C	611	1253	1864	0.0827763	0	0	784	1114	1898	0.0705166	0	0	1077	671	1748	0.155066	0	0	0	0		2611	1030	3641	0.219571	0	0	1804	2164	3968	0.160774	0	0	1622	2046	3668	0.334475	0	0	0	0
18S	1208	G	1242	1083	2325	0.342175	0	0	1243	863	2106	0.206376	0	0	1197	439	1636	0.163348	0	0	0	0		4231	1429	5660	0.560258	0	0	2397	1019	3416	0.079615	0	0	1716	1204	2920	0.198855	0	0	0	0
18S	1209	G	941	662	1603	0.0814284	0	0	1014	689	1703	0.0476591	0	0	958	550	1508	0.162035	0	0	0	0		1832	1378	3210	0.197806	0	0	1722	1277	2999	0.0173444	0	0	1184	643	1827	0.235522	0	0.19071	0.0635699	0.0899014
18S	1210	A	428	535	963	0.413716	0.0316766	0.292859	500	502	1002	0.578653	0.0225888	0.36678	509	484	993	0.185815	0	0.156831	0.272157	0.0869525		670	798	1468	0.709757	0.107642	0.415287	1057	1500	2557	0.0706976	0	0.0660536	790	1053	1843	0.0926127	0	0.0848047	0.188715	0.160393
18S	1211	A	130	754	884	0.332404	0	0.249689	146	752	898	0.603597	0	0.376663	109	647	756	0.386966	0.060426	0.279268	0.301873	0.0542455		166	858	1024	1.17056	0.148915	0.539532	644	1524	2168	0.154224	0	0.13367	168	1053	1221	0.466039	0.0416199	0.318068	0.330423	0.165922
18S	1212	G	198	827	1025	0.00922677	0	0.00915125	373	1990	2363	0.498806	0	0	191	565	756	0.265272	0	0.209875	0.0730089	0.0968513		510	1245	1755	0.0539484	0	0.0512146	884	1341	2225	0.0497754	0	0.0474356	365	687	1052	0.548961	0.0295828	0.354623	0.151091	0.143927
18S	1213	G	221	586	807	0.152984	0	0.132828	371	1343	1714	0.338199	0	0	329	540	869	0.0295913	0	0	0.044276	0.0626157		702	780	1482	0.0816363	0	0.0755219	1298	1369	2667	0.219557	0	0	803	882	1685	0.180032	0	0	0.025174	0.0356014
18S	1214	G	158	299	457	0.892795	0.11218	0.472225	213	518	731	0.546418	0.0157012	0.353657	212	178	390	1.05897	0.202782	0.514959	0.446947	0.0682342		428	182	610	1.38567	0.07662	0.581229	661	563	1224	0.666884	0.159194	0.400274	647	252	899	0.426741	0.0232595	0.299335	0.426946	0.116618
18S	1215	C	222	265	487	0.51571	0.0357163	0.340704	301	567	868	0.134037	0	0.118314	289	292	581	0.209775	0	0.173646	0.210888	0.0945322		625	132	757	0.46696	0	0.318605	926	691	1617	0.129611	0	0.114803	671	256	927	0.242229	0	0.195165	0.209524	0.0838191
18S	1216	A	211	284	495	0.352621	0.00651276	0.261084	301	256	557	0.696057	0	0.410831	221	227	448	0.498515	0.0711129	0.333168	0.335028	0.0611484		380	152	532	0.888701	0.149795	0.471004	661	546	1207	0.460007	0.0679937	0.315251	345	405	750	0.548513	0.055998	0.354524	0.380259	0.0661386
18S	1217	C	150	538	688	0.0722948	0	0	140	315	455	1.08426	0.069646	0.520761	193	465	658	0.0351711	0	0	0.173587	0.245489		298	355	653	0.561332	0	0.359874	391	865	1256	0.327093	0.00303224	0.246621	310	402	712	0.64192	0.102183	0.391291	0.332595	0.0621313
18S	1218	C	209	461	670	0.075443	0	0	316	350	666	0.374896	0	0.27297	313	546	859	0.289793	0	0	0.09099	0.128679		632	349	981	0.0515501	0	0.0490705	667	1485	2152	0.299025	0	0	779	419	1198	0.0461496	0	0	0.0163568	0.0231321
18S	1219	A	76	245	321	1.00252	0.22113	0.501407	96	209	305	2.0049	0.347516	0.667937	107	293	400	0.657246	0.142364	0.397187	0.522177	0.111505		284	417	701	0.593447	0.0398135	0.372763	251	871	1122	0.411378	0.0589727	0.291657	442	343	785	0.613981	0.108772	0.380714	0.348378	0.0402391
18S	1220	C	389	438	827	0.312225	0	0	543	379	922	0.103503	0	0	300	325	625	0.0123536	0	0	0	0		751	409	1160	0.0321466	0	0	795	764	1559	0.0682977	0	0	940	283	1223	0.0033406	0	0	0	0
18S	1221	C	230	321	551	0.104348	0	0.0946434	368	330	698	0.286584	0	0.222996	183	396	579	0.114368	0	0.102789	0.140143	0.0586803		424	290	714	0.787677	0.16333	0.44096	517	893	1410	0.0511851	0	0.0487256	789	416	1205	0.0580708	0	0.0549267	0.181537	0.183457
18S	1222	A	412	185	597	0.00923449	0	0.00916518	778	332	1110	0.205651	0	0	357	451	808	0.220409	0	0	0.00305506	0.0043205		915	376	1291	0.026849	0	0.0261667	1042	653	1695	0.146593	0	0	1599	372	1971	0.377581	0	0	0.00872223	0.0123351
18S	1223	G	589	328	917	0.386868	0	0	1011	434	1445	0.39237	0	0	410	353	763	0.153112	0	0	0	0		1386	740	2126	0.375014	0	0	1019	309	1328	0.133108	0	0.117549	1433	354	1787	0.273558	0	0	0.0391831	0.0554133
18S	1224	G	396	125	521	0.120094	0	0.107401	860	210	1070	0.118311	0	0	323	358	681	0.00187357	0	0	0.0358004	0.0506294		1432	284	1716	0.156449	0	0	661	803	1464	0.0734699	0	0.068485	827	548	1375	0.0152939	0	0.0150743	0.0278531	0.0293828
18S	1225	A	459	212	671	0.191617	0	0	1042	459	1501	0.413071	0	0	289	415	704	0.0462411	0	0	0	0		1907	241	2148	0.309327	0	0	685	947	1632	0.0432877	0	0	1306	651	1957	0.339383	0	0	0	0
18S	1226	G	181	190	371	0.591846	0.100839	0.372427	465	317	782	0.273308	0	0.214859	100	266	366	0.990978	0.246411	0.498416	0.361901	0.116001		1220	379	1599	0.0211458	0	0.0207206	489	670	1159	0.459473	0.103059	0.315007	742	181	923	0.518915	0.0666374	0.341879	0.225869	0.145476
18S	1227	U	125	419	544	0.00909276	0	0.00902724	508	457	965	0.0283414	0	0	56	672	728	0.0743027	0	0	0.00300908	0.00425548		1177	271	1448	0.171237	0	0.146288	420	1057	1477	0.139768	0	0.122702	817	328	1145	0.15765	0	0.136284	0.135091	0.00966591
18S	1228	G	233	232	465	0.154411	0	0.134007	417	401	818	0.102849	0	0.0933609	115	592	707	0.0814972	0	0	0.0757892	0.0561012		1204	578	1782	0.043329	0	0	551	1038	1589	0.0428302	0	0.0410959	574	506	1080	0.161928	0	0.139473	0.0601895	0.0585183
18S	1229	G	239	261	500	0.13371	0	0.118149	363	376	739	0.177057	0	0.150596	91	548	639	0.00109375	0	0	0.0895816	0.0647141		1221	132	1353	0.329698	0.0620301	0.248087	587	975	1562	0.0622734	0	0.0586581	525	872	1397	0.201407	0	0	0.102248	0.105868
18S	1230	A	61	311	372	0.845249	0	0.458734	109	557	666	0.380793	0	0.276078	57	1069	1126	0.464961	0	0	0.244937	0.188568		750	529	1279	0.428307	0.110456	0.300035	232	2601	2833	0.443594	0	0	221	1410	1631	0.376648	0	0	0.100012	0.141438
18S	1231	G	103	313	416	0.817106	0	0.450269	99	402	501	0.976627	0.0337959	0.494586	54	623	677	0.0263684	0	0	0.314952	0.223438		887	1310	2197	0.2128	0	0	357	1644	2001	0.142385	0	0	261	396	657	0.680176	0.0712245	0.405191	0.135064	0.191009
18S	1232	C	231	594	825	0.0441889	0	0	191	1065	1256	0.275639	0	0	77	612	689	0.0380193	0	0	0	0		1409	676	2085	0.167087	0	0	493	1634	2127	0.196382	0	0	358	669	1027	0.0438067	0	0	0	0
18S	1233	C	331	218	549	0.63196	0	0.387672	318	288	606	0.676039	0	0.403752	63	220	283	1.60313	0.273123	0.616681	0.469368	0.104373		1704	153	1857	0.0464897	0	0	755	772	1527	0.175473	0	0.149362	425	360	785	0.257591	0	0.205036	0.118133	0.0865695
18S	1234	U	237	23	260	2.70847	0.282871	0.731102	180	15	195	4.47568	0.479119	0.818137	49	28	77	8.58718	0.720803	0.896893	0.815377	0.067712	1	1547	12	1559	0.125399	0	0.11149	555	48	603	2.0457	0.355367	0.672033	283	24	307	2.18582	0.331594	0.686809	0.490111	0.267793
18S	1235	G	185	1143	1328	0.308151	0	0	165	715	880	0.2084	0	0.172621	124	428	552	0.347077	0	0.257998	0.14354	0.107316		1636	513	2149	0.166904	0	0	526	749	1275	0.438184	0	0.304845	320	328	648	0.484712	0	0.326808	0.210551	0.149152
18S	1236	C	142	2523	2665	0.69284	0	0	135	2403	2538	0.637793	0	0	34	1231	1265	0.454511	0	0	0	0		908	1340	2248	0.171479	0	0	352	1973	2325	0.239257	0	0	281	801	1082	0.13715	0	0	0	0
18S	1237	G	242	1002	1244	0.179589	0	0	322	1567	1889	0.460241	0	0	117	750	867	0.146557	0	0	0	0		835	640	1475	0.392969	0	0.282246	556	1678	2234	0.210137	0	0	389	1157	1546	0.407865	0	0	0.0940821	0.133052
18S	1238	G	260	1042	1302	0.20921	0	0	171	941	1112	0.00585005	0	0.00582123	64	834	898	0.148214	0	0	0.00194041	0.00274415		483	1205	1688	0.26864	0	0.211853	303	1589	1892	0.0265364	0	0	127	725	852	0.279784	0	0.218818	0.143557	0.10155
18S	1239	C	169	695	864	0.211908	0	0.175021	127	693	820	0.348423	0	0.258627	83	874	957	0.192426	0	0	0.144549	0.10776		408	1138	1546	0.419155	0	0.29549	201	1533	1734	0.0669613	0	0.0627928	148	685	833	0.386651	0	0.279079	0.212454	0.106038
18S	1240	U	101	166	267	3.0609	0.387255	0.754443	78	419	497	1.25379	0.0640893	0.5568	52	277	329	1.63862	0.20368	0.621728	0.644323	0.0822541		246	236	482	3.79703	0.514952	0.79188	184	358	542	2.72165	0.42694	0.731664	65	160	225	4.79253	0.633581	0.827996	0.783847	0.0397356	1
18S	1241	U	201	792	993	0.0010731	0	0	192	1223	1415	0.276828	0	0	112	1313	1425	0.457317	0	0	0	0		487	3381	3868	0.483145	0	0	331	2786	3117	0.406614	0	0	192	1444	1636	0.21629	0	0	0	0
18S	1242	A	182	732	914	0.0279903	0	0.0272571	159	785	944	0.115802	0	0.103883	64	698	762	0.113558	0	0.102097	0.0777457	0.0357083		378	2456	2834	0.217382	0	0	239	2156	2395	0.159057	0	0	116	1488	1604	0.122229	0	0	0	0
18S	1243	A	157	826	983	0.16626	0	0	163	744	907	0.0860255	0	0.0792917	85	730	815	0.0178649	0	0	0.0264306	0.0373785		477	2610	3087	0.292872	0	0	230	1917	2147	0.0557469	0	0	135	1747	1882	0.22011	0	0	0	0
18S	1244	U	156	859	1015	0.253882	0	0	148	766	914	0.0171949	0	0	107	797	904	0.17159	0	0	0	0		338	3462	3800	0.464369	0	0	168	2127	2295	0.159596	0	0	130	1834	1964	0.267504	0	0	0	0
18S	1245	U	98	548	646	0.19684	0	0.164679	68	666	734	0.240454	0	0.194056	70	641	711	0.0738452	0	0.0688571	0.142531	0.0534578		175	1618	1793	0.239595	0	0.193372	114	1342	1456	0.383124	0	0.277136	105	1462	1567	0.0292375	0	0	0.156836	0.116053
18S	1246	U	79	446	525	0.486396	0.0131016	0.327651	56	520	576	0.668592	0.0517105	0.401109	78	505	583	0.286777	0	0.223162	0.317307	0.073014		155	509	664	2.41407	0.270403	0.707406	128	1453	1581	0.248834	0	0.199354	77	1396	1473	0.0685135	0	0.0641611	0.32364	0.276919
18S	1247	G	129	530	659	0.209057	0	0.173126	141	752	893	0.084253	0	0.0777863	104	574	678	0.0981836	0	0.0895255	0.113479	0.0424481		180	1826	2006	0.0520678	0	0.0495143	176	2422	2598	0.282617	0	0	161	1791	1952	0.211925	0	0	0.0165048	0.0233413
18S	1248	A	116	615	731	0.124271	0	0.11067	174	878	1052	0.0206394	0	0	97	618	715	0.00451583	0	0.00450179	0.0383904	0.0511421		153	3088	3241	0.4461	0	0	180	2346	2526	0.29362	0	0	126	1864	1990	0.22739	0	0	0	0
18S	1249	C	62	796	858	0.0350666	0	0	74	1473	1547	0.316351	0	0	35	645	680	0.0576603	0	0.0545926	0.0181975	0.0257352		114	1519	1633	0.131334	0	0.116151	112	1770	1882	0.0622942	0	0	100	1842	1942	0.23263	0	0	0.0387169	0.054754
18S	1250	U	318	52	370	1.50839	0.332714	0.601984	276	61	337	2.86032	0.452957	0.741523	293	22	315	1.50418	0.335904	0.601428	0.648312	0.0659104		367	92	459	3.0487	0.46246	0.753411	640	41	681	1.80073	0.351289	0.643287	349	81	430	3.03968	0.475719	0.752888	0.716529	0.05179
18S	1251	C	899	134	1033	0.127079	0	0	896	116	1012	0.368213	0	0.269314	901	142	1043	0.295456	0	0	0.0897714	0.126956		983	836	1819	0.131862	0	0	1566	323	1889	0.0753204	0	0	1184	43	1227	0.388699	0	0.280066	0.0933552	0.132024
18S	1252	A	664	197	861	0.159332	0	0.137572	834	556	1390	0.0739835	0	0.0689332	546	80	626	0.326741	0	0.24657	0.151025	0.0731411		777	331	1108	0.48441	0.00589153	0.32653	1294	162	1456	0.267239	0	0.210997	950	600	1550	0.13011	0	0.115196	0.217574	0.0864022
18S	1253	A	726	239	965	0.0885093	0	0.0813898	913	251	1164	0.438541	0.0581937	0.305033	560	102	662	0.326931	0.0181785	0.246662	0.211028	0.094715		680	1051	1731	0.0747498	0	0	1066	104	1170	0.651912	0.105196	0.394845	676	164	840	1.27737	0.210253	0.56119	0.318678	0.23535
18S	1254	C	1342	244	1586	0.350095	0	0	2101	472	2573	0.363192	0	0	951	162	1113	0.212049	0	0	0	0		1014	726	1740	0.110926	0	0	1771	331	2102	0.132097	0	0	1624	573	2197	0.169533	0	0	0	0
18S	1255	A	931	146	1077	0.0360647	0	0.0348405	1782	148	1930	0.0658381	0	0	614	83	697	0.359089	0	0.264492	0.0997775	0.117336		807	661	1468	0.00742001	0	0.00737034	1127	188	1315	0.441245	0.0192678	0.306317	983	193	1176	0.684612	0.0128869	0.406597	0.240095	0.169577
18S	1256	C	1204	245	1449	0.266383	0	0	1902	242	2144	0.156669	0	0	1161	93	1254	0.2895	0	0	0	0		1069	646	1715	0.147591	0	0	2356	493	2849	0.408277	0	0	2479	1272	3751	0.550847	0	0	0	0
18S	1257	G	1010	323	1333	0.180093	0	0	2173	673	2846	0.35931	0	0	1031	128	1159	0.200402	0	0	0	0		892	860	1752	0.0928187	0	0	1217	800	2017	0.0934534	0	0	1490	1306	2796	0.339606	0	0	0	0
18S	1258	G	1048	342	1390	0.234084	0	0	1483	699	2182	0.106001	0	0	1088	140	1228	0.25976	0	0	0	0		1045	437	1482	0.142961	0	0.125153	1328	1002	2330	0.236112	0	0	1414	1059	2473	0.24382	0	0	0.0417178	0.0589978
18S	1259	G	911	124	1035	0.0451094	0	0.0432023	1537	496	2033	0.0276248	0	0	1013	100	1113	0.17314	0	0	0.0144008	0.0203657		1077	247	1324	0.407623	0.0474137	0.289738	1417	969	2386	0.261989	0	0	1291	716	2007	0.0716633	0	0	0.0965792	0.136584
18S	1260	A	907	146	1053	0.00983555	0	0	1727	163	1890	0.0665374	0	0.0624173	1041	89	1130	0.196915	0	0	0.0208058	0.0294238		926	218	1144	0.81476	0.171252	0.449179	1349	655	2004	0.0899141	0	0	1331	704	2035	0.0976697	0	0	0.149726	0.211745
18S	1261	A	648	169	817	0.189717	0	0.159628	1414	188	1602	0.208734	0	0.172777	605	42	647	0.390158	0.0342259	0.280969	0.204458	0.0543671		673	667	1340	0.59763	0.0947853	0.374248	805	532	1337	0.3476	0	0.258083	773	594	1367	0.297003	0	0.229121	0.287151	0.0627117
18S	1262	A	354	129	483	0.936134	0.160349	0.484023	1063	188	1251	0.494223	0.0310269	0.330933	428	37	465	0.874487	0.163707	0.467055	0.427337	0.0685194		462	1319	1781	0.235135	0	0.190459	398	212	610	1.99324	0.388156	0.666278	436	413	849	1.04056	0.197694	0.510233	0.455656	0.198049
18S	1263	C	599	228	827	0.0121578	0	0.0120261	1607	228	1835	0.0416304	0	0	612	70	682	0.147584	0	0.128769	0.0469315	0.0580754		678	2310	2988	0.285506	0	0	1109	335	1444	0.111349	0	0.100255	858	228	1086	0.370152	0	0.270336	0.12353	0.111584
18S	1264	C	747	234	981	0.196402	0	0	1816	282	2098	0.177836	0	0	800	124	924	0.246667	0	0	0	0		896	2105	3001	0.270712	0	0	1383	476	1859	0.199056	0	0	1216	225	1441	0.0975035	0	0	0	0
18S	1265	U	618	295	913	0.178896	0	0	1675	285	1960	0.12276	0	0	700	108	808	0.20846	0	0	0	0		888	2596	3484	0.393148	0	0	1216	450	1666	0.157522	0	0	980	314	1294	0.0893694	0	0	0	0
18S	1266	C	611	249	860	0.157233	0	0	1810	356	2166	0.23482	0	0	754	96	850	0.337629	0	0	0	0		1264	3050	4314	0.549525	0	0	1590	691	2281	0.465264	0	0	1397	285	1682	0.397029	0	0	0	0
18S	1267	A	192	98	290	1.60997	0.307952	0.617666	780	156	936	0.890573	0.127523	0.471326	301	56	357	0.57005	0.0823808	0.363725	0.484239	0.104073		649	1079	1728	0.247947	0	0.198776	647	339	986	0.297591	0	0.22952	647	253	900	0.111444	0	0.10037	0.176222	0.0550846
18S	1268	C	122	115	237	2.14272	0.373299	0.682717	376	69	445	3.01724	0.451042	0.751492	258	36	294	0.801356	0.12044	0.445701	0.626637	0.130985		688	1097	1785	0.117556	0	0.105243	787	208	995	0.198338	0	0.16565	548	207	755	0.234612	0	0.190233	0.153709	0.0357094
18S	1269	C	679	145	824	0.125791	0	0	1773	127	1900	0.103478	0	0	440	42	482	0.0747412	0	0.0696777	0.0232259	0.0328464		740	758	1498	0.244756	0	0.196735	865	96	961	0.242666	0	0.195442	585	149	734	0.261859	0	0.207743	0.199973	0.00551918
18S	1270	C	936	155	1091	0.351577	0	0	2896	177	3073	0.483586	0	0	353	83	436	0.220086	0	0.180725	0.0602416	0.0851945		827	770	1597	0.0291128	0	0.0283064	951	161	1112	0.0282021	0	0.0274525	673	123	796	0.139969	0	0.122919	0.0595592	0.0448033
18S	1271	G	583	158	741	0.0138515	0	0.0136804	1751	75	1826	0.0706684	0	0	214	89	303	0.796382	0.0341589	0.444139	0.152606	0.20622		404	235	639	1.37368	0.176148	0.579095	618	79	697	0.613547	0.0428197	0.380585	397	79	476	0.900023	0.115931	0.474214	0.477965	0.0810845
18S	1272	G	499	178	677	0.128925	0	0.114351	1268	158	1426	0.187596	0	0.158056	136	76	212	1.69577	0.283875	0.630147	0.300851	0.23353		366	140	506	1.60655	0.165901	0.616818	454	348	802	0.317033	0	0.240946	340	106	446	0.982053	0.130579	0.496033	0.451265	0.15668
18S	1273	C	438	175	613	0.310116	0	0.237003	1392	93	1485	0.129498	0	0.114719	330	145	475	0.244888	0	0.197047	0.182923	0.0509116		557	579	1136	0.0936187	0	0	768	204	972	0.0373301	0	0.0360224	605	191	796	0.050007	0	0.0476823	0.0279016	0.0202955
18S	1274	C	415	112	527	0.653325	0.115748	0.395611	819	85	904	0.954266	0.0828197	0.488575	268	65	333	1.03283	0.255918	0.508825	0.464337	0.0492948		247	334	581	0.778561	0.0973241	0.438171	379	70	449	1.47116	0.33786	0.595868	434	39	473	0.922269	0.212654	0.480309	0.504782	0.0666648
18S	1275	C	1088	132	1220	0.274065	0	0	2534	110	2644	0.362168	0	0	872	120	992	0.295826	0	0	0	0		651	426	1077	0.136023	0	0	1335	82	1417	0.209011	0	0	1348	36	1384	0.368231	0	0	0	0
18S	1276	G	866	159	1025	0.041423	0	0	1746	196	1942	0.087688	0	0	880	147	1027	0.238327	0	0	0	0		875	401	1276	0.29404	0	0	1373	144	1517	0.203579	0	0	1242	127	1369	0.32262	0	0	0	0
18S	1277	G	704	185	889	0.182559	0	0.154523	1171	222	1393	0.249299	0	0.199665	557	284	841	0.0563209	0	0.053378	0.135856	0.061163		365	110	475	1.05033	0.214064	0.512798	764	285	1049	0.299757	0	0.230794	754	186	940	0.0951588	0	0.0869748	0.276856	0.176867
18S	1278	A	603	224	827	0.389788	0.0378011	0.28071	910	223	1133	0.556663	0.0194856	0.357803	508	374	882	0.113213	0	0.101803	0.246772	0.107231		437	499	936	0.0614491	0	0.0579499	527	299	826	0.849523	0.159901	0.459621	608	241	849	0.32285	0	0.244273	0.253948	0.164124
18S	1279	C	794	379	1173	0.0791406	0	0.0733947	1293	731	2024	0.136219	0	0	649	617	1266	0.139981	0	0	0.0244649	0.0345986		608	309	917	0.19793	0	0.165377	829	822	1651	0.00528652	0	0.00526189	777	450	1227	0.000416214	0	0	0.0568797	0.0767494
18S	1280	A	564	475	1039	0.427233	0.0260138	0.299545	681	623	1304	0.489493	0.00326572	0.3288	544	428	972	0.267968	0	0.211508	0.279951	0.0498483		547	422	969	0.214444	0	0.176728	552	858	1410	0.384802	0	0.278017	671	408	1079	0.347726	0	0.258187	0.237644	0.0438283
18S	1281	C	591	1072	1663	0.026015	0	0	970	1870	2840	0.333157	0	0	433	928	1361	0.0349078	0	0	0	0		631	439	1070	0.229816	0	0.187012	779	1943	2722	0.238075	0	0	797	686	1483	0.0817161	0	0.0755901	0.0875342	0.0768132
18S	1282	G	693	1101	1794	0.0383473	0	0	798	1242	2040	0.0217758	0	0	509	838	1347	0.0368777	0	0.0355915	0.0118638	0.016778		817	560	1377	0.00603935	0	0.00600743	921	1087	2008	0.173121	0	0.147636	597	543	1140	0.542701	0.0452667	0.351986	0.168543	0.142017
18S	1283	G	782	735	1517	0.260833	0	0.206982	387	817	1204	0.829866	0.144182	0.453718	461	816	1277	0.176561	0	0.150165	0.270288	0.131762		577	492	1069	0.45028	0.0852152	0.310678	1056	1068	2124	0.204356	0	0.169747	526	817	1343	0.420949	0.0358207	0.2964	0.258942	0.0633392
18S	1284	A	650	1111	1761	0.087489	0	0.0804924	543	988	1531	0.407021	0	0.289413	521	911	1432	0.0364193	0	0.0351632	0.135023	0.110727		861	870	1731	0.123146	0	0	924	1342	2266	0.144984	0	0.126674	547	1076	1623	0.186788	0	0.157472	0.0947151	0.0681437
18S	1285	C	1605	1155	2760	0.297086	0	0	938	1870	2808	0.229481	0	0	1039	1317	2356	0.38014	0	0	0	0		1338	688	2026	0.182525	0	0	1843	1945	3788	0.309671	0	0	987	1729	2716	0.267296	0	0	0	0
18S	1286	A	1826	1431	3257	0.411391	0	0	1170	1897	3067	0.289211	0	0	975	766	1741	0.119983	0	0	0	0		1295	769	2064	0.151213	0	0	2352	1886	4238	0.376769	0	0	1529	2418	3947	0.50828	0	0	0	0
18S	1287	G	1799	1240	3039	0.356806	0	0	1336	1450	2786	0.181769	0	0	1213	722	1935	0.217304	0	0	0	0		1808	762	2570	0.282445	0	0	2124	1530	3654	0.242569	0	0	1341	1635	2976	0.292879	0	0	0	0
18S	1288	G	1349	555	1904	0.0866142	0	0.0797487	711	1450	2161	0.0929129	0	0.08505	906	806	1712	0.090718	0	0	0.0549329	0.0389037		1534	425	1959	0.0538719	0	0.0511428	1829	1314	3143	0.0820999	0	0	828	1231	2059	0.0962783	0	0.0878618	0.0463349	0.0360302
18S	1289	A	1804	621	2425	0.205175	0	0	1168	2122	3290	0.302137	0	0	1148	875	2023	0.261254	0	0	0	0		1801	641	2442	0.139883	0	0	2060	1447	3507	0.174528	0	0	1133	1785	2918	0.249964	0	0	0	0
18S	1290	U	34	5	39	51.8233	0.948754	0.981534	21	182	203	12.2018	0.819773	0.924596	23	8	31	51.3875	0.951616	0.981497	0.962542	0.026832	1	32	13	45	52.0754	0.953353	0.981561	36	10	46	69.5501	0.965959	0.986123	37	12	49	49.0909	0.947526	0.980428	0.982704	0.00246158	1
18S	1291	U	1385	1187	2572	0.336494	0	0	974	2453	3427	0.308152	0	0	1023	1028	2051	0.318421	0	0	0	0		2363	917	3280	0.36368	0	0	2203	1092	3295	0.0846649	0	0	1325	1716	3041	0.295792	0	0	0	0
18S	1292	G	960	351	1311	0.309697	0	0.236602	588	1658	2246	0.114177	0	0.102517	652	407	1059	0.358931	0	0.264311	0.201143	0.0706506		995	905	1900	0.188848	0	0.15892	1426	974	2400	0.305498	0	0.234083	859	1065	1924	0.143215	0	0.125331	0.172778	0.0454665
18S	1293	A	1027	502	1529	0.0126144	0	0.0124653	788	1568	2356	0.0656249	0	0.061608	835	386	1221	0.152282	0	0.132251	0.0687747	0.0491642		1964	1204	3168	0.334252	0	0	1670	953	2623	0.192653	0	0.161585	981	767	1748	0.213379	0	0.175938	0.112508	0.0797705
18S	1294	C	1313	787	2100	0.363388	0	0	1269	1631	2900	0.163947	0	0	1283	747	2030	0.383905	0	0	0	0		1709	1599	3308	0.396357	0	0	3141	1184	4325	0.318439	0	0	1513	1112	2625	0.266925	0	0	0	0
18S	1295	A	799	442	1241	0.0793434	0	0.0735656	1102	2057	3159	0.240383	0	0	989	327	1316	0.0309795	0	0	0.0245219	0.0346792		1474	1063	2537	0.21541	0	0	2629	961	3590	0.160008	0	0	1410	850	2260	0.151103	0	0	0	0
18S	1296	G	491	372	863	0.507575	0	0.336942	642	1178	1820	0.408463	0	0.290119	584	270	854	0.558428	0	0.358597	0.328553	0.0285782		688	942	1630	0.226405	0	0.184701	2112	823	2935	0.0459431	0	0.0439393	1190	433	1623	0.18958	0	0.15945	0.129363	0.0612773
18S	1297	A	627	165	792	0.667073	0.0803204	0.400449	983	1535	2518	0.0276521	0	0.0269184	844	285	1129	0.180728	0	0.153179	0.193516	0.155138		828	710	1538	0.296867	0	0.229025	3123	752	3875	0.216629	0	0	1344	628	1972	0.0172439	0	0	0.0763418	0.107964
18S	1298	U	503	763	1266	0.0903446	0	0	726	1845	2571	0.042319	0	0	733	571	1304	0.0601447	0	0	0	0		1012	734	1746	0.0178401	0	0.0175373	2747	815	3562	0.178408	0	0	1130	749	1879	0.0397636	0	0	0.00584576	0.00826715
18S	1299	U	403	991	1394	0.217045	0	0	747	2466	3213	0.279202	0	0	841	865	1706	0.326414	0	0	0	0		1001	802	1803	0.0685637	0	0	2538	1128	3666	0.229028	0	0	1271	1048	2319	0.276552	0	0	0	0
18S	1300	G	219	689	908	0.206405	0	0.171247	380	1550	1930	0.223948	0	0.18305	485	359	844	0.424576	0	0.298285	0.217527	0.057307		332	571	903	0.817207	0.157273	0.449979	1334	1417	2751	0.0234617	0	0.022932	597	572	1169	0.497664	0.0936112	0.332483	0.268465	0.180122
18S	1301	A	201	570	771	0.340731	0.00869143	0.254384	393	1730	2123	0.0399718	0	0.0384528	518	324	842	0.340675	0	0.254332	0.18239	0.101779		388	561	949	0.622398	0.11113	0.383877	1080	833	1913	0.440195	0.0949969	0.305761	565	805	1370	0.197245	0	0.164849	0.284829	0.0906346
18S	1302	U	344	1125	1469	0.359274	0	0	588	2739	3327	0.424983	0	0	1061	1164	2225	0.57628	0	0	0	0		743	999	1742	0.190145	0	0	1642	920	2562	0.00140894	0	0	770	1235	2005	0.242694	0	0	0	0
18S	1303	A	189	647	836	0.204022	0	0.169619	249	1964	2213	0.131582	0	0	426	338	764	0.431605	0	0.301759	0.157126	0.123509		570	622	1192	0.230726	0	0.187599	979	681	1660	0.538993	0.101824	0.350361	437	1009	1446	0.0554634	0	0.0525833	0.196848	0.121743
18S	1304	G	280	523	803	0.256122	0.0181663	0.204101	241	968	1209	0.545372	0.117203	0.353095	285	197	482	1.2963	0.232773	0.565026	0.374074	0.148092		492	476	968	0.556072	0.112983	0.357593	677	694	1371	0.811014	0.187688	0.448003	423	399	822	0.849237	0.171456	0.459538	0.421712	0.0455825
18S	1305	C	338	491	829	0.213989	0	0.176445	496	787	1283	0.326367	0.0104495	0.246206	451	310	761	0.381438	0	0.276379	0.23301	0.0418515		1301	237	1538	0.0444517	0	0	1576	647	2223	0.053702	0	0.0509869	747	457	1204	0.20213	0	0.168259	0.0730821	0.070446
18S	1306	U	348	599	947	0.0572082	0	0.0541665	365	830	1195	0.280788	0	0.219374	439	341	780	0.293826	0	0.227323	0.166955	0.0798192		1214	352	1566	0.0311494	0	0	1699	615	2314	0.00564915	0	0	598	882	1480	0.0605897	0	0	0	0
18S	1307	C	424	428	852	0.26117	0	0.207278	573	742	1315	0.107531	0	0.0971576	568	393	961	0.0671287	0	0.0629672	0.122468	0.061573		1771	252	2023	0.231752	0	0	2166	902	3068	0.271844	0	0	1102	549	1651	0.167366	0	0	0	0
18S	1308	U	349	802	1151	0.0688272	0	0	421	799	1220	0.135099	0	0.119105	480	654	1134	0.108184	0	0	0.0397018	0.0561468		1532	323	1855	0.135285	0	0	1763	807	2570	0.102775	0	0	828	973	1801	0.248909	0	0	0	0
18S	1309	U	294	599	893	0.224944	0	0.183804	311	670	981	0.313227	0.0151971	0.238702	329	680	1009	0.040385	0	0	0.140835	0.102076		1036	312	1348	0.210131	0	0.17375	1045	874	1919	0.244022	0	0.196238	573	428	1001	0.425216	0.0496173	0.298561	0.22285	0.0543177
18S	1310	U	240	752	992	0.135773	0	0.119648	303	691	994	0.210341	0	0.173931	298	973	1271	0.242584	0	0	0.0978596	0.0726592		926	639	1565	0.031368	0	0.0304328	1140	1341	2481	0.0674277	0	0	375	574	949	0.497813	0.0678195	0.332594	0.121009	0.150128
18S	1311	C	374	1011	1385	0.197916	0	0	324	812	1136	0.0272647	0	0.0265638	380	711	1091	0.0919007	0	0	0.00885461	0.0125223		1023	839	1862	0.160035	0	0	1326	1437	2763	0.191844	0	0	503	1105	1608	0.160286	0	0	0	0
18S	1312	U	296	1140	1436	0.14678	0	0	378	608	986	0.208218	0	0.172479	292	631	923	0.113841	0	0.102305	0.0915948	0.0708205		926	1210	2136	0.275032	0	0	1355	1237	2592	0.15277	0	0	472	1328	1800	0.260763	0	0	0	0
18S	1313	C	434	1378	1812	0.288429	0	0	425	1375	1800	0.357684	0	0	455	970	1425	0.289053	0	0	0	0		1045	958	2003	0.197527	0	0	1323	1207	2530	0.14635	0	0	616	549	1165	0.262312	0	0.207944	0.0693147	0.0980257
18S	1314	G	305	682	987	0.481343	0	0.325159	327	984	1311	0.060747	0	0	294	494	788	0.375919	0.0308972	0.273465	0.199541	0.142667		573	558	1131	0.487456	0.0433095	0.327906	840	943	1783	0.185544	0	0.15658	530	830	1360	0.07968	0	0.0738499	0.186112	0.105799
18S	1315	A	259	628	887	0.740528	0.0950353	0.425737	274	1038	1312	0.0439029	0	0	215	636	851	0.306025	0	0.234529	0.220089	0.174106		656	286	942	0.845045	0.146695	0.458271	729	1700	2429	0.161029	0	0	593	1099	1692	0.147713	0	0	0.152757	0.216031
18S	1316	U	159	1079	1238	0.259286	0	0.206031	181	458	639	1.09139	0.197311	0.522239	149	843	992	0.130558	0	0.115584	0.281285	0.174336		401	888	1289	0.399931	0.0093162	0.285837	363	981	1344	0.655803	0.112681	0.396241	356	760	1116	0.486402	0.0059266	0.327432	0.336504	0.0455265
18S	1317	U	178	783	961	0.696778	0.0685012	0.410899	254	575	829	0.642664	0.0871389	0.39152	233	330	563	1.12833	0.263803	0.53059	0.444336	0.0615015		381	442	823	1.37224	0.316968	0.578753	384	378	762	2.33144	0.359069	0.700105	458	390	848	1.31379	0.2141	0.568099	0.615652	0.0598754
18S	1318	C	362	2418	2780	0.492441	0	0	417	970	1387	0.0438681	0	0	345	863	1208	0.0542505	0	0	0	0		684	1555	2239	0.16816	0	0	910	1008	1918	0.37574	0	0.273222	995	378	1373	0.521955	0.0266898	0.343115	0.205445	0.148048
18S	1319	C	448	2087	2535	0.448488	0	0	566	1648	2214	0.430133	0	0	515	1205	1720	0.333837	0	0	0	0		985	1821	2806	0.324756	0	0	1201	1249	2450	0.180756	0	0.153138	1572	1291	2863	0.281809	0	0	0.051046	0.0721899
18S	1320	G	319	1497	1816	0.219091	0	0	460	1023	1483	0.100247	0	0	330	668	998	0.292359	0	0.226397	0.0754655	0.106724		544	1230	1774	0.209258	0	0.173127	913	525	1438	1.36	0.278574	0.57644	992	859	1851	0.357115	0	0.263248	0.337605	0.172843
18S	1321	U	113	1752	1865	0.273211	0	0	112	1394	1506	0.125127	0	0	82	1714	1796	0.307846	0	0	0	0		176	2307	2483	0.135507	0	0	256	3107	3363	0.0428954	0	0.0411428	381	1301	1682	0.635565	0.0351949	0.388732	0.143291	0.174363
18S	1322	G	250	940	1190	0.111064	0	0.100038	250	643	893	0.471551	0	0.320689	283	1029	1312	0.0330964	0	0	0.140242	0.133972		423	2522	2945	0.294282	0	0	792	2791	3583	0.0015749	0	0	1312	2103	3415	0.240434	0	0	0	0
18S	1323	G	338	661	999	0.241033	0	0.194376	809	826	1635	0.239568	0	0	447	974	1421	0.105337	0	0	0.0647922	0.09163		992	1485	2477	0.124572	0	0	1856	4997	6853	0.501261	0	0	2781	2394	5175	0.507953	0	0	0	0
18S	1324	G	278	362	640	0.794644	0.0294436	0.443172	452	810	1262	0.0381015	0	0	370	532	902	0.429064	0	0.300474	0.247882	0.184706		567	1485	2052	0.0435731	0	0.0417732	1609	3831	5440	0.338222	0	0	2053	1316	3369	0.190026	0	0	0.0139244	0.0196921
18S	1325	U	64	525	589	0.64177	0	0.391305	175	1120	1295	0.117481	0	0	91	1549	1640	0.297874	0	0	0.130435	0.184463		240	2499	2739	0.274546	0	0	409	5453	5862	0.400595	0	0	567	1734	2301	0.250212	0	0.200205	0.0667352	0.0943778
18S	1326	G	432	621	1053	0.270799	0	0	754	675	1429	0.294351	0	0	678	1372	2050	0.507611	0	0	0	0		1230	1973	3203	0.436423	0	0	3050	3119	6169	0.464036	0	0	4637	810	5447	0.562857	0	0	0	0
18S	1327	G	294	448	742	0.00396291	0	0	386	642	1028	0.0183458	0	0	301	834	1135	0.052054	0	0	0	0		820	683	1503	0.343255	0	0.255666	1748	2105	3853	0.0965289	0	0	1459	1507	2966	0.119238	0	0	0.0852221	0.120522
18S	1328	U	1	5	6	107.113	0.973727	0.992061	8	7	15	66.234	0.959052	0.986043	3	10	13	78.519	0.962425	0.988312	0.988806	0.00248152	1	10	17	27	77.7853	0.962156	0.987755	44	33	77	46.0258	0.941458	0.979002	49	24	73	37.5051	0.923138	0.974371	0.980376	0.00554959	1
18S	1329	G	283	478	761	0.124745	0	0	450	864	1314	0.3018	0	0	370	997	1367	0.325869	0	0	0	0		1039	1059	2098	0.0335292	0	0	1481	1229	2710	0.182483	0	0.15437	1972	695	2667	0.0955272	0	0	0.0514567	0.0727707
18S	1330	G	6	12	18	39.2251	0.929176	0.976417	3	35	38	25.6425	0.899683	0.963393	2	17	19	50.6822	0.93916	0.981601	0.973804	0.00765952	1	13	12	25	87.4274	0.964468	0.989122	21	14	35	87.6355	0.964149	0.989028	35	37	72	32.9514	0.906932	0.970938	0.983029	0.00854982	1
18S	1331	U	422	150	572	0.272348	0	0.214346	416	538	954	0.0374753	0	0	332	396	728	0.272489	0	0.21437	0.142905	0.101049		1301	653	1954	0.0949247	0	0.0867357	1423	752	2175	0.258691	0	0.205599	1631	1029	2660	0.23087	0	0	0.0974448	0.0842762
18S	1332	G	442	302	744	0.0567785	0	0.0537963	460	284	744	0.310977	0	0.237453	392	220	612	0.474733	0	0.322267	0.204506	0.112052		1181	501	1682	0.356084	0	0.262697	917	779	1696	0.559916	0	0.359076	1040	590	1630	0.289952	0	0.224884	0.282219	0.0564958
18S	1333	C	858	459	1317	0.419078	0	0	815	590	1405	0.307097	0	0	702	538	1240	0.356102	0	0	0	0		2543	1075	3618	0.392874	0	0	2023	1616	3639	0.354319	0	0	1870	957	2827	0.35312	0	0	0	0
18S	1334	A	666	240	906	0.0537547	0	0	689	384	1073	0.0215394	0	0.0211045	513	366	879	0.0445455	0	0	0.00703483	0.00994875		2611	1071	3682	0.369496	0	0	1431	1259	2690	0.103216	0	0	1445	672	2117	0.110566	0	0	0	0
18S	1335	U	621	555	1176	0.214113	0	0	737	404	1141	0.111734	0	0.100583	469	846	1315	0.347087	0	0	0.0335278	0.0474154		2290	1807	4097	0.391337	0	0	1420	2696	4116	0.42386	0	0	1851	890	2741	0.289128	0	0	0	0
18S	1336	G	573	355	928	0.0878603	0	0.0808443	759	443	1202	0.186672	0	0.157418	536	388	924	0.0362042	0	0	0.0794206	0.0642733		1510	588	2098	0.362077	0	0.26592	1263	1390	2653	0.0595746	0	0	977	620	1597	0.328605	0	0.247448	0.171123	0.121237
18S	1337	G	342	388	730	0.584055	0.0922054	0.369028	592	248	840	1.12851	0.202532	0.530484	458	201	659	0.508855	0.0736383	0.337585	0.412366	0.0845032		1264	671	1935	0.606629	0.0819805	0.3777	938	1422	2360	0.108109	0	0.0975987	776	505	1281	0.880066	0.159523	0.468298	0.314532	0.157791
18S	1338	C	994	492	1486	0.207681	0	0	1068	474	1542	0.300605	0	0.231242	526	370	896	0.129023	0	0.114391	0.115211	0.094406		2100	931	3031	0.0359902	0	0.0347509	715	2015	2730	0.0776232	0	0	1027	377	1404	0.827821	0.146993	0.453077	0.162609	0.205881
18S	1339	C	920	264	1184	0.118697	0	0.106183	1963	254	2217	0.0343903	0	0.0332615	855	280	1135	0.0790493	0	0	0.0464814	0.0443454		3216	480	3696	0.112737	0	0	1331	2240	3571	0.335517	0	0	2179	580	2759	0.0141626	0	0	0	0
18S	1340	G	737	169	906	0.603994	0.12669	0.376815	1593	208	1801	0.531237	0.0669571	0.347059	586	140	726	0.537322	0.122765	0.349831	0.357902	0.0134215		1734	332	2066	0.760479	0.17547	0.432092	807	534	1341	0.850985	0.218085	0.459932	1717	273	1990	0.580696	0.0809724	0.367484	0.419836	0.0387239
18S	1341	U	1187	196	1383	0.098579	0	0.0897922	2418	208	2626	0.160686	0	0.138486	783	359	1142	0.0377272	0	0	0.0760927	0.0573606		2375	891	3266	0.124841	0	0.111016	1107	599	1706	0.373716	0.0496216	0.272164	2272	391	2663	0.282345	0.0089495	0.220243	0.201141	0.0671607
18S	1342	U	1161	219	1380	0.141194	0	0.123803	3040	277	3317	0.0167772	0	0	665	285	950	0.17793	0	0.151188	0.0916637	0.0657731		2392	1666	4058	0.10672	0	0	1178	542	1720	0.265582	0.00311945	0.209946	3064	287	3351	0.071367	0	0.0666316	0.0921926	0.0875951
18S	1343	C	1689	260	1949	0.209641	0	0	3938	664	4602	0.288157	0	0	1079	273	1352	0.204837	0	0	0	0		2938	1070	4008	0.0783459	0	0	1449	816	2265	0.0975581	0	0	3988	582	4570	0.185269	0	0	0	0
18S	1344	U	1641	461	2102	0.2438	0	0	3978	482	4460	0.224215	0	0	987	452	1439	0.233511	0	0	0	0		3123	1192	4315	0.104253	0	0	1491	512	2003	0.0664504	0	0.0623391	4459	404	4863	0.157783	0	0	0.0207797	0.0293869
18S	1345	U	1958	304	2262	0.31092	0	0	4734	305	5039	0.321504	0	0	1109	465	1574	0.303944	0	0	0	0		3967	1092	5059	0.246212	0	0	1467	577	2044	0.0508394	0	0.0484024	4820	896	5716	0.26359	0	0	0.0161341	0.0228171
18S	1346	A	2085	231	2316	0.328327	0	0	5826	268	6094	0.468874	0	0	1125	226	1351	0.172617	0	0	0	0		4380	1262	5642	0.33662	0	0	1710	420	2130	0.0347151	0	0.0335656	5901	656	6557	0.344063	0	0	0.0111885	0.015823
18S	1347	G	1746	394	2140	0.228258	0	0	4298	328	4626	0.277943	0	0	833	211	1044	0.148357	0	0.129299	0.0430995	0.0609519		3702	1382	5084	0.221527	0	0	1464	506	1970	0.23768	0	0.192115	4743	507	5250	0.110872	0	0	0.0640384	0.090564
18S	1348	U	811	252	1063	0.770155	0.0817485	0.435309	2592	325	2917	0.185089	0	0.156226	598	215	813	0.575621	0.0793926	0.365615	0.31905	0.118597		2047	495	2542	0.697601	0.135265	0.411029	765	824	1589	0.701174	0.167512	0.412323	3004	679	3683	0.34731	0.0226422	0.257832	0.360395	0.0725246
18S	1349	U	319	282	601	2.58029	0.389814	0.721027	836	371	1207	2.03155	0.366831	0.670319	262	335	597	1.44038	0.260978	0.590632	0.660659	0.0536702		1141	371	1512	2.047	0.400606	0.671954	476	1265	1741	0.709051	0.201504	0.415019	1770	1463	3233	0.610362	0.134693	0.379094	0.488689	0.130415
18S	1350	G	1102	409	1511	0.425691	0	0.298724	1604	591	2195	0.530252	0	0.346616	776	453	1229	0.192475	0	0.161518	0.268953	0.0784434		4064	821	4885	0.125872	0	0	1737	2078	3815	0.246127	0	0	3878	2238	6116	0.216471	0	0	0	0
18S	1351	G	922	162	1084	1.26453	0.200006	0.558634	1139	325	1464	1.33623	0.182213	0.572127	820	266	1086	0.549371	0.0301209	0.354788	0.495183	0.0994272		2588	483	3071	0.517383	0.0494048	0.341044	1261	1635	2896	0.132869	0	0.117321	1705	1547	3252	0.590276	0.0936866	0.37125	0.276538	0.113257
18S	1352	U	1185	315	1500	0.733037	0.106731	0.423141	1245	678	1923	0.712376	0.0148129	0.416142	718	541	1259	0.440944	0.0331461	0.306179	0.381821	0.0535631		3074	639	3713	0.244839	0	0.196726	1683	2473	4156	0.20444	0	0	2238	3032	5270	0.0805751	0	0	0.0655753	0.0927375
18S	1353	G	2823	123	2946	0.0678128	0	0	2628	172	2800	0.149514	0	0.130108	1467	405	1872	0.0408317	0	0.03925	0.0564525	0.0544912		5418	400	5818	0.224819	0	0	2651	1699	4350	0.199686	0	0	3434	2473	5907	0.211653	0	0	0	0
18S	1354	G	3692	171	3863	0.228511	0	0	3834	267	4101	0.211133	0	0	2056	234	2290	0.0520345	0	0	0	0		5269	182	5451	0.132712	0	0	3366	996	4362	0.159877	0	0	3536	1553	5089	0.0837175	0	0	0	0
18S	1355	A	5089	234	5323	0.407332	0	0	5626	411	6037	0.458375	0	0	3153	352	3505	0.353416	0	0	0	0		7007	501	7508	0.369284	0	0	3793	1299	5092	0.280647	0	0	4863	2252	7115	0.392463	0	0	0	0
18S	1356	G	2630	178	2808	0.365729	0	0.26786	2137	373	2510	0.642006	0.0300215	0.391084	1796	195	1991	0.379652	0	0.27528	0.311408	0.0564207		3854	212	4066	0.372693	0	0.271554	1552	830	2382	0.71451	0.14947	0.416845	1929	823	2752	0.746684	0.135336	0.427576	0.371992	0.0711551
18S	1357	C	4668	393	5061	0.260986	0	0	4106	513	4619	0.111277	0	0	3613	346	3959	0.322719	0	0	0	0		6064	307	6371	0.152933	0	0	3656	1628	5284	0.308956	0	0	3843	1799	5642	0.260297	0	0	0	0
18S	1358	G	2965	252	3217	0.288758	0	0.224113	2697	351	3048	0.500222	0.0374222	0.333505	2356	213	2569	0.177683	0	0.150925	0.236181	0.075025		3486	262	3748	0.60805	0.109899	0.378191	2314	659	2973	0.31345	0.0119942	0.238707	2102	1433	3535	0.208208	0	0.172368	0.263089	0.0857774
18S	1359	A	4687	372	5059	0.183445	0	0	4341	579	4920	0.0324211	0	0	2760	318	3078	0.021284	0	0.020847	0.00694901	0.00982738		5603	213	5816	0.0517201	0	0.0491847	3139	913	4052	0.0495161	0	0	2563	1351	3914	0.0291301	0	0.0283126	0.0258324	0.020156
18S	1360	U	4627	415	5042	0.174341	0	0	4798	435	5233	0.0383688	0	0	3349	509	3858	0.177809	0	0	0	0		5282	629	5911	0.0769884	0	0.0714961	3233	943	4176	0.0704307	0	0	2607	840	3447	0.132267	0	0.116846	0.0627806	0.0480985
18S	1361	U	3973	439	4412	0.0486618	0	0	4868	392	5260	0.00454286	0	0	2569	504	3073	0.0841538	0	0.077645	0.0258817	0.0366022		4747	663	5410	0.255426	0.0130417	0.203488	1964	671	2635	0.569423	0.0751267	0.362911	1910	591	2501	0.562332	0.0631827	0.360023	0.308807	0.0744816
18S	1362	U	4656	795	5451	0.301186	0	0	6711	672	7383	0.341441	0	0	3640	833	4473	0.317715	0	0	0	0		7252	1753	9005	0.292834	0	0	2496	1513	4009	0.035442	0	0	3271	1292	4563	0.261956	0	0	0	0
18S	1363	G	2298	308	2606	0.520564	0.0325246	0.342436	3690	510	4200	0.248785	0	0.199259	2269	296	2565	0.240309	0	0.19381	0.245169	0.0688143		3586	1709	5295	0.279737	0	0.218622	1505	913	2418	0.671935	0.0457293	0.40199	1383	827	2210	0.598332	0.0483855	0.374454	0.331689	0.0807366
18S	1364	U	2766	718	3484	0.0579085	0	0.0547535	4222	604	4826	0.0776972	0	0.0721094	2641	642	3283	0.0911456	0	0	0.0422877	0.0307299		4944	3264	8208	0.224349	0	0	2189	1268	3457	0.123315	0	0.109806	1794	909	2703	0.261785	0	0.207533	0.10578	0.0847727
18S	1365	C	3783	924	4707	0.281297	0	0	6208	1463	7671	0.357556	0	0	3156	516	3672	0.233854	0	0	0	0		6455	2078	8533	0.257571	0	0	4596	1703	6299	0.428451	0	0	2603	1264	3867	0.134321	0	0	0	0
18S	1366	U	2463	948	3411	0.0529504	0	0	4692	1820	6512	0.225825	0	0	2447	944	3391	0.213722	0	0	0	0		5634	3000	8634	0.282749	0	0	3919	1483	5402	0.319162	0	0	2617	1764	4381	0.228782	0	0	0	0
18S	1367	G	2279	1306	3585	0.191479	0	0	4787	1147	5934	0.12638	0	0	2313	828	3141	0.21986	0	0	0	0		6464	3219	9683	0.400375	0	0	4028	1467	5495	0.350174	0	0	2698	1634	4332	0.168854	0	0	0	0
18S	1368	G	571	519	1090	1.69001	0.313681	0.628468	1150	633	1783	2.17466	0.410696	0.685127	723	420	1143	1.17053	0.252906	0.539501	0.617699	0.0599374		1439	2732	4171	0.468251	0.0751979	0.31897	1280	875	2155	0.829741	0.137141	0.45359	1090	779	1869	1.24195	0.225555	0.554093	0.442217	0.0963248
18S	1369	U	485	711	1196	1.29268	0.20058	0.564034	814	1501	2315	1.39021	0.28153	0.581732	457	441	898	1.57108	0.293499	0.611323	0.585696	0.019508		1037	572	1609	2.71219	0.495974	0.73074	1014	626	1640	1.45938	0.272468	0.593541	715	687	1402	2.24278	0.432421	0.691775	0.672018	0.0577271
18S	1370	U	1091	2573	3664	0.326548	0	0	2320	3083	5403	0.00643556	0	0	1332	1461	2793	0.273197	0	0	0	0		2402	1864	4266	0.279491	0	0.218479	2345	1508	3853	0.052932	0	0.0502835	2033	2820	4853	0.00832761	0	0	0.0895876	0.0934235
18S	1371	A	774	1357	2131	0.190416	0	0.16002	1729	3101	4830	0.127112	0	0.112797	939	473	1412	0.450539	0	0.310753	0.194523	0.0844172		1731	2716	4447	0.12779	0	0.113333	2199	1101	3300	0.270389	0	0.212891	1749	2932	4681	0.110679	0	0.0996692	0.141964	0.0504618
18S	1372	A	789	802	1591	0.556798	0	0.3578	1532	4438	5970	0.12616	0	0	1073	370	1443	0.352247	0	0.260624	0.206141	0.151066		2524	2861	5385	0.154763	0	0	2740	969	3709	0.11749	0	0.105163	2361	2797	5158	0.0677048	0	0.063423	0.0561953	0.0432357
18S	1373	U	776	836	1612	0.62134	0	0.383373	1299	7155	8454	0.395372	0	0	878	470	1348	0.523449	0	0.343762	0.242378	0.172149		2029	2334	4363	0.0649328	0	0.0609867	2482	784	3266	0.392967	0	0.28217	2313	4606	6919	0.165157	0	0	0.114385	0.121226
18S	1374	U	1097	856	1953	0.364699	0	0.267338	1692	4606	6298	0.126766	0	0	1054	495	1549	0.32324	0	0.244398	0.170579	0.12098		2520	1525	4045	0.0959494	0	0.0875688	3138	703	3841	0.225736	0	0.184203	2380	4777	7157	0.15253	0	0	0.0905905	0.0752308
18S	1375	C	1342	2261	3603	0.237545	0	0	2437	3346	5783	0.00393038	0	0.00391567	1472	922	2394	0.120232	0	0	0.00130522	0.00184586		3093	1677	4770	0.0701483	0	0	4680	956	5636	0.123293	0	0	3105	4698	7803	0.1847	0	0	0	0
18S	1376	C	2023	1626	3649	0.142438	0	0	3130	3327	6457	0.0309539	0	0	1711	888	2599	0.0837607	0	0	0	0		2734	1812	4546	0.0494856	0	0.0471621	5774	2080	7854	0.315483	0	0	3864	7086	10950	0.396313	0	0	0.0157207	0.0222324
18S	1377	G	1367	623	1990	0.787114	0.107361	0.440562	2169	1127	3296	1.03797	0.202914	0.509392	1001	443	1444	0.829396	0.106765	0.453543	0.467833	0.0298611		1187	1310	2497	1.0969	0.246355	0.523205	3492	636	4128	0.489449	0	0.328664	2465	2426	4891	0.533256	0.0404548	0.34784	0.399903	0.0875387
18S	1378	A	1638	945	2583	0.444887	0.0193335	0.307987	2616	1574	4190	0.617644	0.0871304	0.381873	1432	963	2395	0.143837	0	0.125795	0.271885	0.107615		1767	1919	3686	0.43091	0.0442868	0.301201	4216	807	5023	0.260231	0	0.206527	3359	2831	6190	0.19295	0	0.161764	0.223164	0.0581279
18S	1379	U	3573	1920	5493	0.361026	0	0	7152	1276	8428	0.279611	0	0	3598	1249	4847	0.488437	0	0	0	0		3936	5289	9225	0.508581	0	0	8843	954	9797	0.416441	0	0	6286	2485	8771	0.225413	0	0	0	0
18S	1380	A	2137	1526	3663	0.110107	0	0.0992106	4248	2794	7042	0.0843895	0	0	1556	715	2271	0.314334	0	0.239238	0.112816	0.0981414		1822	2419	4241	0.226604	0	0.184777	4762	1179	5941	0.0700699	0	0.0654919	4061	1822	5883	0.193457	0	0.162121	0.137463	0.051725
18S	1381	A	2300	2116	4416	0.0416019	0	0	4046	1731	5777	0.166438	0	0.14271	1839	870	2709	0.159155	0	0.137347	0.0933523	0.0660463		1567	3267	4834	0.0696036	0	0.0650868	4428	2111	6539	0.0479018	0	0	3754	2008	5762	0.186134	0	0.156948	0.0740115	0.0643837
18S	1382	C	3870	2859	6729	0.382703	0	0	8960	3272	12232	0.490507	0	0	3601	1636	5237	0.410205	0	0	0	0		3419	3389	6808	0.266079	0	0	7691	3521	11212	0.503335	0	0	7502	4119	11621	0.494581	0	0	0	0
18S	1383	G	2408	3244	5652	0.230196	0	0	4714	1400	6114	0.131852	0	0.116509	2027	1296	3323	0.0434416	0	0.041645	0.0527182	0.0482049		1667	5733	7400	0.336521	0	0	4635	1929	6564	0.120526	0	0	4008	3440	7448	0.215092	0	0	0	0
18S	1384	A	1527	2239	3766	0.245453	0	0.197121	3604	2774	6378	0.0785564	0	0.0728453	1390	1862	3252	0.106725	0	0.0964603	0.122142	0.0538876		1082	4542	5624	0.0972662	0	0	2901	2306	5207	0.0887033	0	0.0814905	2457	2450	4907	0.186754	0	0.157392	0.0796276	0.0642687
18S	1385	A	8	1104	1112	3.59518	0.573938	0.782534	53	209	262	27.8314	0.899252	0.965443	3	162	165	23.6503	0.898606	0.959667	0.902548	0.0848957	1	11	1360	1371	2.98807	0.514028	0.749389	25	38	63	93.3599	0.971717	0.989566	20	84	104	56.3298	0.951192	0.98272	0.907225	0.111642	1
18S	1386	C	1072	5325	6397	0.296376	0	0	5364	6147	11511	0.463495	0	0	1321	3124	4445	0.193925	0	0	0	0		1120	4026	5146	0.0594348	0	0	2663	3802	6465	0.247531	0	0	2872	3798	6670	0.279963	0	0	0	0
18S	1387	G	267	4909	5176	0.133645	0	0	2740	4598	7338	0.140414	0	0	420	4249	4669	0.245603	0	0	0	0		458	3877	4335	0.0913284	0	0.0837032	992	2261	3253	0.483473	0	0.325974	1590	3537	5127	0.117583	0	0	0.136559	0.138227
18S	1388	A	42	5823	5865	0.256569	0	0	1344	7784	9128	0.341813	0	0	168	5887	6055	0.43735	0	0	0	0		367	5278	5645	0.12999	0	0	462	4921	5383	0.213286	0	0	890	3806	4696	0.107016	0	0	0	0
18S	1389	G	179	4033	4212	0.00123691	0	0.00123568	564	4876	5440	0.0830913	0	0.0767299	350	4260	4610	0.275349	0	0	0.0259885	0.0358831		295	4344	4639	0.107795	0	0.0973245	845	3608	4453	0.15366	0	0	454	3659	4113	0.124299	0	0	0.0324415	0.0458792
18S	1390	A	155	4206	4361	0.118057	0	0	252	3629	3881	0.499124	0	0.333001	177	3000	3177	0.0436997	0	0.0418827	0.124961	0.148097		161	3330	3491	0.509937	0	0.337785	444	2881	3325	0.0806441	0	0.0746467	107	2806	2913	0.143663	0	0.125654	0.179362	0.113941
18S	1391	C	253	4621	4874	0.277267	0	0	436	4627	5063	0.0637177	0	0.0599121	245	3914	4159	0.276279	0	0	0.0199707	0.0282428		216	3902	4118	0.302905	0	0.232528	435	4378	4813	0.334176	0	0	427	2861	3288	0.0815141	0	0	0.0775093	0.109615
18S	1392	U	353	4630	4983	0.338064	0	0	583	6366	6949	0.271253	0	0	296	2789	3085	0.0226111	0	0	0	0		364	6397	6761	0.226754	0	0	401	3923	4324	0.257498	0	0	569	2538	3107	0.0483197	0	0	0	0
18S	1393	C	58	339	397	7.49087	0.714519	0.882488	62	1075	1137	3.47047	0.494866	0.776463	61	284	345	7.78516	0.722617	0.886463	0.848471	0.0509436	1	38	894	932	5.42834	0.590964	0.84458	50	236	286	10.764	0.811509	0.915266	47	85	132	21.5769	0.895218	0.956025	0.90529	0.046041	1
18S	1394	U	282	4243	4525	0.450845	0	0	341	6423	6764	0.409125	0	0	222	3387	3609	0.356602	0	0	0	0		298	11679	11977	0.5906	0	0	448	2165	2613	0.120488	0	0.107568	566	1821	2387	0.0606505	0	0.0572049	0.0549244	0.0439442
18S	1395	G	275	1171	1446	0.701313	0.0205915	0.412386	338	4001	4339	0.110054	0	0	285	1169	1454	0.538969	0	0.350371	0.254252	0.181557		331	7890	8221	0.354966	0	0	412	1789	2201	0.28628	0	0.222643	431	1859	2290	0.0570105	0	0.0539579	0.0922003	0.0948309
18S	1396	G	166	321	487	3.74809	0.459654	0.78973	357	3389	3746	0.00318477	0	0	289	914	1203	0.734099	0.0139434	0.423535	0.404421	0.322689		330	5182	5512	0.00675575	0	0.00671162	329	2049	2378	0.196222	0	0.164092	226	2022	2248	0.0873425	0	0.0803595	0.0837211	0.0642943
18S	1397	C	365	785	1150	0.720687	0	0.419048	624	2474	3098	0.160202	0	0.13812	534	1220	1754	0.0787274	0	0.0730203	0.210063	0.150146		495	5621	6116	0.131869	0	0	576	2169	2745	0.0579388	0	0.0547846	478	1677	2155	0.168903	0	0.144555	0.0664464	0.0595875
18S	1398	A	334	561	895	0.982502	0	0.495866	617	1266	1883	0.837391	0.0487954	0.455882	356	679	1035	0.752424	0	0.429598	0.460449	0.0272458		506	1767	2273	1.48446	0.18677	0.597604	528	1197	1725	0.799472	0.0810837	0.444425	394	1074	1468	0.805355	0.12935	0.446261	0.496096	0.0717807
18S	1399	U	244	1623	1867	0.190721	0	0	795	1703	2498	0.276417	0	0.216625	431	1679	2110	0.211074	0	0	0.0722083	0.102118		454	4501	4955	0.0400256	0	0.0384926	711	2560	3271	0.0202764	0	0	281	3165	3446	0.236528	0	0	0.0128309	0.0181456
18S	1400	G	215	817	1032	0.678703	0	0.404535	540	1409	1949	0.733726	0.076986	0.423333	318	679	997	0.934725	0.131947	0.483381	0.437083	0.033625		446	5805	6251	0.185247	0	0	582	1269	1851	1.1237	0.259183	0.529258	638	1843	2481	0.254978	0	0.203239	0.244165	0.217998
18S	1401	C	298	1662	1960	0.188441	0	0	578	3131	3709	0.179838	0	0	403	1495	1898	0.0481657	0	0	0	0		522	3772	4294	0.122036	0	0.108786	704	3163	3867	0.0848242	0	0.0782103	1110	1741	2851	0.205567	0	0.170565	0.119187	0.0384141
18S	1402	U	324	1812	2136	0.203073	0	0	762	3332	4094	0.27142	0	0	649	2051	2700	0.32952	0	0	0	0		829	3512	4341	0.0331926	0	0.0321334	1046	4383	5429	0.174586	0	0	1375	2968	4343	0.183998	0	0	0.0107111	0.0151478
18S	1403	A	326	970	1296	0.516937	0.0591077	0.34095	513	1583	2096	0.565777	0.0748133	0.361449	500	1057	1557	0.314691	0	0.239482	0.31396	0.053325		824	1536	2360	0.930312	0.174484	0.482055	1018	3727	4745	0.0504963	0	0.0480787	904	2491	3395	0.178661	0	0.151618	0.22725	0.185066
18S	1404	A	270	1128	1398	0.506576	0.105837	0.336403	551	1391	1942	0.889638	0.113607	0.470926	428	982	1410	0.558942	0.0974537	0.358702	0.388677	0.0588672		865	3915	4780	0.127707	0	0	818	4097	4915	0.10292	0	0.0933333	531	2487	3018	0.493902	0.077808	0.330685	0.141339	0.139204
18S	1405	C	351	1850	2201	0.038354	0	0	873	3471	4344	0.156875	0	0	644	1850	2494	0.141826	0	0	0	0		1583	3773	5356	0.234105	0	0	1164	5931	7095	0.232021	0	0	759	4562	5321	0.136344	0	0	0	0
18S	1406	U	421	2211	2632	0.191581	0	0	797	3409	4206	0.02293	0	0	716	1980	2696	0.207766	0	0	0	0		1434	3594	5028	0.218716	0	0	1257	6405	7662	0.268882	0	0	547	4676	5223	0.0931428	0	0	0	0
18S	1407	A	430	2620	3050	0.297808	0	0	738	3239	3977	0.0942936	0	0.0861883	557	1974	2531	0.142321	0	0	0.0287294	0.0406295		1556	2605	4161	0.097616	0	0	1141	6733	7874	0.285579	0	0	745	6265	7010	0.349354	0	0	0	0
18S	1408	G	283	2494	2777	0.215059	0	0	591	2773	3364	0.391134	0	0.281222	344	2058	2402	0.102039	0	0	0.0937407	0.132569		1034	1971	3005	0.22926	0	0.186553	847	5560	6407	0.115866	0	0	575	4181	4756	0.0169808	0	0.0167007	0.0677512	0.0842817
18S	1409	U	380	2156	2536	0.165988	0	0	701	3508	4209	0.0941568	0	0.0860729	378	2063	2441	0.170748	0	0	0.028691	0.0405751		1219	1927	3146	0.0805564	0	0.0745728	726	5251	5977	0.095779	0	0	822	5189	6011	0.254811	0	0	0.0248576	0.035154
18S	1410	U	475	2342	2817	0.296116	0	0	1264	7319	8583	0.517284	0	0	772	2648	3420	0.473952	0	0	0	0		1776	2497	4273	0.288515	0	0	941	6223	7164	0.31139	0	0	1131	6656	7787	0.479667	0	0	0	0
18S	1411	A	215	1359	1574	0.263019	0	0.208351	520	4021	4541	0.00444493	0	0	309	995	1304	0.460817	0.0409753	0.315617	0.174656	0.131035		922	1805	2727	0.0431492	0	0.0413789	575	2823	3398	0.448334	0.0697611	0.309615	601	4172	4773	0.147186	0	0	0.116998	0.137244
18S	1412	C	163	1778	1941	0.0995366	0	0	305	7789	8094	0.530377	0	0	120	1606	1726	0.0486007	0	0	0	0		474	1639	2113	0.185772	0	0.15673	462	4694	5156	0.202909	0	0	356	2583	2939	0.282029	0	0.220045	0.125592	0.092492
18S	1413	G	32	1554	1586	0.0132185	0	0	41	3295	3336	0.192751	0	0.161643	38	1012	1050	0.4257	0	0.29879	0.153478	0.122117		162	2408	2570	0.185133	0	0	146	2142	2288	0.668502	0.0951129	0.400765	162	1262	1424	1.4204	0.23611	0.587015	0.32926	0.244924
18S	1414	C	172	1771	1943	0.343679	0	0	223	5749	5972	0.456528	0	0	186	1388	1574	0.218681	0	0	0	0		638	1661	2299	0.206126	0	0	390	2426	2816	0.116215	0	0.104148	638	2348	2986	0.0821002	0	0	0.0347161	0.049096
18S	1415	G	75	558	633	0.887907	0.217254	0.470706	113	1533	1646	1.01515	0.149079	0.50391	116	595	711	0.607272	0.0421324	0.378158	0.450925	0.0532093		341	519	860	1.03982	0.222976	0.510052	166	2015	2181	0.242565	0	0.195285	262	964	1226	1.11289	0.10955	0.526917	0.410752	0.152513
18S	1416	A	30	322	352	1.91416	0.356475	0.657488	55	1308	1363	1.10823	0.133036	0.525851	40	451	491	1.0341	0.0957097	0.508891	0.564076	0.0664136		169	324	493	2.23369	0.370805	0.691189	74	2180	2254	0.00145356	0	0	127	1517	1644	0.305897	0	0.234352	0.308513	0.287008
18S	1417	C	42	321	363	1.31007	0.214715	0.567789	94	509	603	2.83258	0.356351	0.739399	77	425	502	0.610316	0.0659691	0.379472	0.56222	0.146992		191	456	647	1.09679	0.16478	0.523467	146	1103	1249	0.526498	0.0617562	0.345087	248	704	952	0.911146	0.0868432	0.477016	0.448523	0.075559
18S	1418	C	118	274	392	0.864009	0.0497602	0.464156	170	600	770	1.48778	0.016041	0.598347	116	315	431	0.75643	0.0845475	0.431232	0.497911	0.0722795		267	308	575	1.23223	0.189231	0.552448	219	630	849	1.03094	0.16139	0.507912	473	252	725	1.25234	0.227619	0.556358	0.538906	0.0219742
18S	1419	C	193	255	448	0.472829	0	0.321521	297	472	769	0.983074	0	0.496057	251	167	418	0.811615	0	0.448597	0.422058	0.073684		727	292	1019	0.317527	0	0.241182	549	426	975	0.561885	0	0.359984	702	290	992	0.6651	0	0.399677	0.333614	0.0673385
18S	1420	C	258	175	433	0.494291	0	0.331297	376	388	764	0.839985	0	0.456842	336	170	506	0.586325	0	0.370072	0.38607	0.0524871		822	287	1109	0.29975	0	0.230781	593	309	902	0.685468	0.0126902	0.40696	1086	462	1548	0.075382	0	0.07014	0.23596	0.137555
18S	1421	C	269	160	429	0.52522	0	0.344883	500	421	921	0.281538	0	0.219874	406	237	643	0.278054	0	0.217825	0.26086	0.0594186		821	250	1071	0.489532	0	0.328854	542	350	892	0.686799	0.0452076	0.407431	1648	316	1964	0.183008	0	0	0.245428	0.176484
18S	1422	G	344	161	505	0.502042	0.0195751	0.33468	635	368	1003	0.227191	0	0.185281	572	159	731	0.283637	0	0.221199	0.247053	0.0636728		1247	218	1465	0.251652	0	0.201166	764	278	1042	0.506466	0.0181254	0.336409	1314	281	1595	0.103133	0	0.093544	0.210373	0.0993628
18S	1423	A	259	293	552	0.628531	0.0971927	0.386379	434	408	842	0.601503	0.0982228	0.375865	420	315	735	0.48128	0.0584092	0.325207	0.362483	0.0267059		993	357	1350	0.609433	0.100026	0.378838	800	405	1205	0.433951	0.047845	0.302801	1372	452	1824	0.0339787	0	0.0328795	0.238173	0.148446
18S	1424	G	320	180	500	1.04779	0.259543	0.512169	515	440	955	0.531125	0.116004	0.347123	509	235	744	0.617852	0.12577	0.382214	0.413835	0.0709929		1221	513	1734	0.360986	0.0199775	0.265351	1074	187	1261	0.539426	0.125255	0.350588	1201	227	1428	0.483337	0.0219877	0.325998	0.313979	0.0358205
18S	1425	C	974	288	1262	0.178235	0	0	1680	1059	2739	0.507145	0	0	1522	377	1899	0.38769	0	0	0	0		3523	552	4075	0.425662	0	0	2216	655	2871	0.317905	0	0	2781	995	3776	0.478237	0	0	0	0
18S	1426	G	1129	284	1413	0.227951	0	0	1553	403	1956	0.224959	0	0	1269	562	1831	0.327535	0	0	0	0		3212	353	3565	0.291213	0	0	2161	353	2514	0.13962	0	0	1793	354	2147	0.025419	0	0.0248001	0.00826671	0.0116909
18S	1427	G	1362	296	1658	0.322383	0	0	1382	367	1749	0.0966984	0	0	994	515	1509	0.128079	0	0	0	0		2965	312	3277	0.188031	0	0	1998	239	2237	0.0412074	0	0.0395936	1419	266	1685	0.337202	0	0.252282	0.0972917	0.11078
18S	1428	U	1787	194	1981	0.433843	0	0	1493	432	1925	0.184718	0	0	1343	768	2111	0.402246	0	0	0	0		3682	221	3903	0.32198	0	0	2316	562	2878	0.184547	0	0	1801	481	2282	0.0689638	0	0	0	0
18S	1429	C	1637	389	2026	0.442082	0	0	1806	259	2065	0.240669	0	0	1225	866	2091	0.396574	0	0	0	0		3570	376	3946	0.325479	0	0	2767	1280	4047	0.428865	0	0	2268	1082	3350	0.415166	0	0	0	0
18S	1430	G	1114	175	1289	0.0648493	0	0	1426	208	1634	0.0108053	0	0	969	280	1249	0.0695378	0	0.0650653	0.0216884	0.0306721		1879	196	2075	0.394364	0.033419	0.282925	2407	818	3225	0.225415	0	0	1865	1200	3065	0.375234	0	0	0.0943083	0.133372
18S	1431	G	768	163	931	0.339032	0.0276799	0.253395	820	472	1292	0.287239	0.0402052	0.223278	679	156	835	0.644458	0.145885	0.392182	0.289618	0.0735585		2355	386	2741	0.0415269	0	0.0398851	1888	496	2384	0.123461	0	0.109935	953	865	1818	0.108924	0	0.0982739	0.082698	0.0306453
18S	1432	C	475	150	625	1.0241	0.21091	0.506354	778	583	1361	0.172124	0	0.14694	325	304	629	1.15882	0.240477	0.537179	0.396824	0.177142		1137	377	1514	0.99326	0.202165	0.498474	1261	794	2055	0.328751	0.0093382	0.247504	424	716	1140	0.713935	0.105495	0.41676	0.38758	0.104515
18S	1433	G	545	242	787	0.623914	0.0395224	0.384504	608	531	1139	0.461696	0.0752749	0.316053	727	226	953	0.384882	0	0.278128	0.326228	0.0440202		1925	125	2050	0.523219	0.0248237	0.343606	1604	275	1879	0.520922	0.0725633	0.342624	916	429	1345	0.438187	0	0.304838	0.330356	0.0180484
18S	1434	U	438	315	753	0.70224	0.0686453	0.41286	460	624	1084	0.554439	0.106079	0.356893	519	390	909	0.431111	0	0.301474	0.357076	0.0454736		1661	371	2032	0.604072	0.0710265	0.376702	1010	539	1549	0.910961	0.209772	0.476864	718	129	847	1.34934	0.247291	0.574638	0.476068	0.0808089
18S	1435	C	626	327	953	0.309748	0	0.236684	711	892	1603	0.0196107	0	0.0192453	718	400	1118	0.101201	0	0.0919756	0.115968	0.0903757		1971	574	2545	0.323497	0.00422199	0.244498	1199	1337	2536	0.133754	0	0.118015	853	423	1276	0.501436	0.0085875	0.334145	0.23222	0.0886608
18S	1436	C	792	197	989	0.274646	0	0.21564	892	531	1423	0.206242	0	0.171079	850	273	1123	0.065085	0	0.0611589	0.149292	0.0649207		2410	515	2925	0.189166	0	0.15912	1895	1301	3196	0.124401	0	0	1072	364	1436	0.297085	0	0.229163	0.129428	0.0958826
18S	1437	C	1216	164	1380	0.0718159	0	0	1608	275	1883	0.0947452	0	0	1409	130	1539	0.242302	0	0	0	0		3333	574	3907	0.0840214	0	0	2795	702	3497	0.212061	0	0	1951	251	2202	0.207117	0	0	0	0
18S	1438	C	1478	217	1695	0.26438	0	0	1826	267	2093	0.211589	0	0	1675	177	1852	0.406362	0	0	0	0		4522	711	5233	0.342598	0	0	3171	435	3606	0.265173	0	0	2076	321	2397	0.302493	0	0	0	0
18S	1439	C	2229	157	2386	0.494866	0	0	2482	404	2886	0.448597	0	0	1817	213	2030	0.47345	0	0	0	0		5590	785	6375	0.463868	0	0	4107	426	4533	0.441602	0	0	2574	435	3009	0.445618	0	0	0	0
18S	1440	A	1435	114	1549	0.167828	0	0	1519	162	1681	0.0174263	0	0.0171379	794	138	932	0.219983	0	0.180475	0.065871	0.0813389		3460	885	4345	0.168888	0	0	2529	340	2869	0.0858575	0	0	1734	238	1972	0.0808414	0	0	0	0
18S	1441	A	1195	106	1301	0.0251835	0	0	1335	213	1548	0.0765942	0	0.0711876	778	146	924	0.154294	0	0.133795	0.0683276	0.0546591		3132	1659	4791	0.290266	0	0	2168	320	2488	0.0142985	0	0.0141025	1428	304	1732	0.0643714	0	0.0605111	0.0248712	0.0258505
18S	1442	C	1414	122	1536	0.227377	0	0	1470	999	2469	0.393522	0	0	683	246	929	0.0644564	0	0.0606146	0.0202049	0.028574		2958	878	3836	0.122761	0	0	2436	364	2800	0.177425	0	0	1653	436	2089	0.111505	0	0	0	0
18S	1443	U	889	657	1546	0.300998	0	0	804	691	1495	0.0129011	0	0	437	654	1091	0.20991	0	0	0	0		1760	1342	3102	0.00650267	0	0.00646272	1286	587	1873	0.130493	0	0.115485	956	577	1533	0.193937	0	0.162524	0.0948238	0.0653653
18S	1444	U	4	99	103	10.3866	0.778748	0.912949	34	2	36	41.8946	0.930318	0.977303	3	20	23	38.169	0.915838	0.975507	0.955253	0.0299226	1	12	606	618	4.14958	0.564647	0.806062	27	3	30	69.8108	0.956567	0.986327	7	9	16	124.494	0.974417	0.992497	0.928295	0.0864686	1
18S	1445	C	715	304	1019	0.00208061	0	0	942	923	1865	0.27255	0	0	438	345	783	0.0991497	0	0.0903106	0.0301035	0.0425728		1917	830	2747	0.00919052	0	0.00911011	1410	881	2291	0.134899	0	0	1305	941	2246	0.119656	0	0	0.0030367	0.00429455
18S	1446	U	338	342	680	0.469016	0	0.319592	410	603	1013	0.41831	0	0.295141	274	280	554	0.684344	0	0.406732	0.340488	0.0478933		1114	671	1785	0.493878	0	0.330725	659	525	1184	0.816681	0	0.449754	808	1178	1986	0.0621596	0	0.0585496	0.279676	0.163737
18S	1447	U	193	196	389	1.67142	0.203174	0.626269	233	401	634	1.38948	0.115934	0.581883	208	272	480	1.1872	0.0375413	0.543311	0.583821	0.033895		546	360	906	1.93848	0.243601	0.659935	363	480	843	1.8413	0.152593	0.648319	532	884	1416	0.628213	0	0.385997	0.56475	0.126487
18S	1448	A	435	370	805	0.299352	0	0.230606	610	766	1376	0.083991	0	0.077535	306	331	637	0.818095	0.0111426	0.450362	0.252834	0.153015		1650	1079	2729	0.120423	0	0	791	695	1486	0.722394	0	0.419577	1216	1761	2977	0.219405	0	0	0.139859	0.19779
18S	1449	G	110	51	161	6.41303	0.69543	0.865823	78	47	125	12.6604	0.819237	0.927334	68	50	118	10.8704	0.802538	0.916406	0.903188	0.0267947	1	135	125	260	9.64334	0.766747	0.906371	95	140	235	11.9589	0.814283	0.923135	102	298	400	6.22117	0.662089	0.861816	0.897107	0.0258761	1
18S	1450	A	768	660	1428	0.23338	0	0	1009	1076	2085	0.249206	0	0	729	884	1613	0.161373	0	0	0	0		1893	1436	3329	0.259566	0	0	1899	1342	3241	0.0740901	0	0	1954	3083	5037	0.49193	0	0	0	0
18S	1451	G	963	541	1504	0.17845	0	0	1558	1028	2586	0.348203	0	0	1559	904	2463	0.42192	0	0	0	0		3592	1129	4721	0.446327	0	0	4650	1171	5821	0.471585	0	0	3020	746	3766	0.218467	0	0	0	0
18S	1452	G	1050	693	1743	0.254957	0	0	1624	1096	2720	0.370178	0	0	1638	967	2605	0.409197	0	0	0	0		2729	778	3507	0.163088	0	0	4301	764	5065	0.313627	0	0	2439	1182	3621	0.151957	0	0	0	0
18S	1453	G	1316	370	1686	0.126418	0	0	1306	746	2052	0.0768794	0	0	1340	817	2157	0.182746	0	0	0	0		2089	556	2645	0.232116	0	0.188446	4129	1200	5329	0.282178	0	0	1981	754	2735	0.220943	0	0.181015	0.123154	0.0871356
18S	1454	A	1246	657	1903	0.176424	0	0	1082	968	2050	0.0485183	0	0	1043	1022	2065	0.0892546	0	0	0	0		2029	1182	3211	0.0477895	0	0.0456234	3311	1097	4408	0.0584587	0	0	1918	1712	3630	0.0779338	0	0	0.0152078	0.0215071
18S	1455	C	1306	802	2108	0.234598	0	0	1391	1400	2791	0.3367	0	0	1551	1293	2844	0.344905	0	0	0	0		2652	1375	4027	0.173946	0	0	4047	1670	5717	0.285523	0	0	2806	2090	4896	0.360933	0	0	0	0
18S	1456	A	428	565	993	0.851945	0.192023	0.460277	418	751	1169	0.816762	0.194528	0.449782	497	590	1087	1.04372	0.222631	0.510926	0.473662	0.0266959		866	888	1754	1.21857	0.272072	0.5494	1236	1531	2767	0.684582	0.123428	0.406468	1019	1738	2757	0.251313	0	0.200898	0.385589	0.143039
18S	1457	A	501	1215	1716	0.0234647	0	0.0229398	842	1203	2045	0.0449115	0	0	293	1068	1361	0.611274	0.094105	0.379546	0.134162	0.173765		1215	3522	4737	0.25606	0	0	1061	2023	3084	0.493953	0.0643633	0.330707	455	2215	2670	0.213582	0	0.176047	0.168918	0.135104
18S	1458	G	796	845	1641	0.0847882	0	0.078205	731	923	1654	0.156254	0	0.135209	1367	552	1919	0.114051	0	0.102423	0.105279	0.0233591		2428	2204	4632	0.234314	0	0	3615	1514	5129	0.177678	0	0	2075	1203	3278	0.0873234	0	0	0	0
18S	1459	U	819	2071	2890	0.426661	0	0	651	1711	2362	0.262552	0	0	1717	1180	2897	0.276654	0	0	0	0		2195	2420	4615	0.187464	0	0	3508	2587	6095	0.322211	0	0	2169	2158	4327	0.35743	0	0	0	0
18S	1460	G	589	1191	1780	0.00331275	0	0.00330366	539	879	1418	0.267434	0	0.211122	1059	826	1885	0.200442	0	0.167047	0.127158	0.0894072		1573	1317	2890	0.423506	0	0.297581	2103	1364	3467	0.277999	0	0.217576	1509	1407	2916	0.0203748	0	0	0.171719	0.12574
18S	1461	G	651	895	1546	0.133125	0	0.117552	486	764	1250	0.382414	0	0.276788	1047	788	1835	0.226271	0	0.184601	0.19298	0.0652772		1291	1550	2841	0.449652	0	0.310255	2072	676	2748	0.615921	0.068895	0.381244	1287	211	1498	0.894915	0.171973	0.472438	0.387979	0.0663822
18S	1462	C	1259	489	1748	0.0647036	0	0	1092	1268	2360	0.383345	0	0	2529	753	3282	0.394947	0	0	0	0		2373	3073	5446	0.317551	0	0	4213	1186	5399	0.275078	0	0	2131	600	2731	0.115617	0	0	0	0
18S	1463	G	739	499	1238	0.382988	0	0.27709	371	1010	1381	0.0923782	0	0.0846222	1033	669	1702	0.270529	0	0.213025	0.191579	0.0800245		825	1369	2194	0.898051	0.0988998	0.473257	2189	1413	3602	0.13341	0	0.117736	1054	815	1869	0.280701	0	0.219269	0.270088	0.149523
18S	1464	U	762	869	1631	0.0108864	0	0.0107757	492	985	1477	0.0355661	0	0	1282	1128	2410	0.149164	0	0	0.00359191	0.00507973		877	3473	4350	0.123315	0	0	2156	1124	3280	0.277415	0	0.217221	1065	298	1363	0.771139	0.072489	0.435572	0.217598	0.177822
18S	1465	U	1083	1024	2107	0.240402	0	0	595	907	1502	0.105818	0	0	2026	1446	3472	0.47477	0	0	0	0		1178	5684	6862	0.508626	0	0	3390	2608	5998	0.382779	0	0	1913	1259	3172	0.340046	0	0	0	0
18S	1466	C	884	929	1813	0.13944	0	0	439	1079	1518	0.169358	0	0	1661	807	2468	0.287521	0	0	0	0		1107	3986	5093	0.339382	0	0	2754	2740	5494	0.349518	0	0	1646	964	2610	0.224648	0	0	0	0
18S	1467	A	411	575	986	0.664235	0.132648	0.399366	276	551	827	0.603972	0.0770292	0.376831	712	381	1093	0.627747	0.0906328	0.385871	0.387356	0.00925964		710	1649	2359	0.502472	0.0039029	0.334524	1430	1525	2955	0.289449	0	0.224534	1137	586	1723	0.208043	0	0.172298	0.243785	0.0676133
18S	1468	G	234	419	653	1.62737	0.37635	0.619752	171	306	477	1.98529	0.352686	0.66549	306	262	568	2.06036	0.374602	0.673628	0.652957	0.0237131		445	1099	1544	1.37179	0.203255	0.578536	824	541	1365	1.98832	0.368278	0.665527	500	266	766	2.01511	0.374064	0.668626	0.637563	0.0417575
18S	1469	C	476	1372	1848	0.144487	0	0	223	541	764	0.835352	0.143799	0.45547	506	590	1096	0.367548	0	0.268943	0.241471	0.186957		723	2509	3232	0.0377084	0	0.0363489	1405	1098	2503	0.530174	0.0120277	0.34657	922	740	1662	0.350551	0	0.259677	0.214199	0.130666
18S	1470	C	928	866	1794	0.0911916	0	0	470	1042	1512	0.0783726	0	0	898	481	1379	0.00360708	0	0.00359672	0.00119891	0.00169551		1265	1719	2984	0.168357	0	0.144138	1649	3631	5280	0.33468	0	0	1408	1590	2998	0.266593	0	0	0.0480461	0.0679474
18S	1471	A	301	1840	2141	0.263632	0	0	194	778	972	0.556743	0.0720723	0.35787	357	595	952	0.381171	0	0.276186	0.211352	0.153124		693	1559	2252	0.57186	0.00308013	0.363914	745	1770	2515	0.507971	0	0.336946	600	1220	1820	0.315413	0	0.239883	0.313581	0.0532628
18S	1472	C	480	1203	1683	0.0515901	0	0	273	1308	1581	0.0420143	0	0	340	584	924	0.273321	0	0.214835	0.0716116	0.101274		963	1056	2019	0.701881	0.0983093	0.412535	786	2767	3553	0.0153505	0	0	864	1368	2232	0.0368264	0	0.0355337	0.149356	0.18666
18S	1473	C	503	1121	1624	0.00322051	0	0	311	1452	1763	0.104611	0	0	220	861	1081	0.017632	0	0.0173422	0.00578074	0.00817519		633	1973	2606	0.331492	0.0337659	0.249035	666	3155	3821	0.12624	0	0	601	1820	2421	0.0466052	0	0	0.0830115	0.117396
18S	1474	C	908	1224	2132	0.239319	0	0	704	1955	2659	0.405109	0	0	424	1232	1656	0.355495	0	0	0	0		1405	4111	5516	0.39945	0	0	1603	4053	5656	0.451376	0	0	1125	2720	3845	0.428746	0	0	0	0
18S	1475	G	988	374	1362	0.273408	0.0315765	0.21483	764	1401	2165	0.200354	0	0	498	530	1028	0.13248	0	0.117083	0.110638	0.0878222		1753	2594	4347	0.185079	0	0	1784	1483	3267	0.0334795	0	0.0324046	1100	1708	2808	0.165595	0	0	0.0108015	0.0152757
18S	1476	A	1248	422	1670	0.012574	0	0	970	1066	2036	0.114635	0	0	516	552	1068	0.083536	0	0.0771624	0.0257208	0.0363747		2194	2585	4779	0.281306	0	0	2194	1294	3488	0.0651731	0	0	1205	1801	3006	0.240602	0	0	0	0
18S	1477	G	821	319	1140	0.466452	0.0785094	0.318272	669	870	1539	0.200166	0	0.166872	428	479	907	0.269175	0	0.212271	0.232472	0.063438		803	3017	3820	0.0950304	0	0	1321	1184	2505	0.230261	0	0.187225	575	1082	1657	0.367116	0	0.268652	0.151959	0.112476
18S	1478	A	1022	359	1381	0.167656	0	0.143672	912	810	1722	0.0927775	0	0.0849457	577	520	1097	0.0526918	0	0.0500977	0.0929052	0.038614		1119	2241	3360	0.014017	0	0.0138273	1597	946	2543	0.197388	0	0.164903	657	1101	1758	0.255821	0	0.2038	0.12751	0.0819394
18S	1479	U	1222	828	2050	0.268449	0	0	983	936	1919	0.0360185	0	0	554	713	1267	0.088293	0	0	0	0		1300	3678	4978	0.386546	0	0	1581	1002	2583	0.138192	0	0.121455	717	1340	2057	0.0190206	0	0.0186745	0.0467099	0.0533999
18S	1480	U	1206	949	2155	0.327381	0	0	977	880	1857	0.00934697	0	0	569	988	1557	0.248395	0	0	0	0		1128	2357	3485	0.133177	0	0	1419	1125	2544	0.126269	0	0.112152	690	1502	2192	0.0877945	0	0	0.037384	0.052869
18S	1481	G	681	607	1288	0.189113	0	0.159141	633	1053	1686	0.101666	0	0.0923338	537	435	972	0.439934	0	0.305742	0.185739	0.0891304		625	1256	1881	0.605373	0.071983	0.377216	1090	1228	2318	0.252398	0	0.201601	440	987	1427	0.458364	0	0.314451	0.297756	0.07266
18S	1482	A	684	510	1194	0.263282	0	0.208549	753	992	1745	0.0347015	0	0.0335563	497	591	1088	0.359708	0	0.264727	0.168944	0.0984425		558	1166	1724	0.656084	0.0376056	0.396305	886	1641	2527	0.157925	0	0.136433	481	1336	1817	0.102689	0	0.0931726	0.208637	0.133871
18S	1483	G	635	692	1327	0.121126	0	0.108112	797	569	1366	0.321905	0.0177677	0.243651	390	493	883	0.832994	0.0780086	0.454725	0.268829	0.14262		711	1023	1734	0.6195	0	0.382662	630	729	1359	1.30693	0.31662	0.566704	359	413	772	1.71544	0.334349	0.632036	0.527134	0.105582
18S	1484	C	779	864	1643	0.075027	0	0	1035	1252	2287	0.247465	0	0	571	821	1392	0.25152	0	0.201087	0.0670289	0.0947932		829	700	1529	0.90504	0.0661999	0.47524	791	2827	3618	0.0955451	0	0	499	1694	2193	0.0657652	0	0	0.158413	0.22403
18S	1485	A	568	478	1046	0.578574	0.0834903	0.366739	800	843	1643	0.0785753	0	0.0728921	391	846	1237	0.564809	0.0605722	0.361131	0.26692	0.137218		585	446	1031	2.00584	0.33099	0.667529	709	2307	3016	0.27222	0	0.214028	506	1378	1884	0.18178	0	0.153888	0.345148	0.229276
18S	1486	A	590	577	1167	0.328577	0	0.247474	857	877	1734	0.0488184	0	0	388	1579	1967	0.045201	0	0	0.0824915	0.116661		640	1177	1817	0.583419	0	0.368583	632	2690	3322	0.161775	0	0.139284	455	1492	1947	0.119809	0	0.10704	0.204969	0.116439
18S	1487	U	829	1301	2130	0.351963	0	0	1107	1653	2760	0.473411	0	0	672	3715	4387	0.625344	0	0	0	0		815	4175	4990	0.482671	0	0	986	5010	5996	0.365481	0	0	732	3595	4327	0.538922	0	0	0	0
18S	1488	A	368	606	974	0.573618	0	0.36476	564	641	1205	0.311599	0	0.237722	291	1609	1900	0.0538255	0	0.0511018	0.217861	0.128818		490	2445	2935	0.0143317	0	0.0141339	537	2831	3368	0.286501	0	0.222749	464	1632	2096	0.14943	0	0.130058	0.122314	0.0853427
18S	1489	A	358	1415	1773	0.172479	0	0	474	631	1105	0.393771	0	0.282706	249	1906	2155	0.0647238	0	0	0.0942352	0.133269		387	4612	4999	0.421482	0	0	531	3039	3570	0.295171	0	0.22795	461	1482	1943	0.338243	0	0.252849	0.160266	0.11378
18S	1490	C	427	2113	2540	0.445822	0	0	473	1470	1943	0.273062	0	0	452	2554	3006	0.332672	0	0	0	0		558	4671	5229	0.43045	0	0	563	7553	8116	0.459105	0	0	671	2351	3022	0.0993935	0	0	0	0
18S	1491	A	282	2169	2451	0.448659	0	0	570	754	1324	0.0394465	0	0.0379771	392	2355	2747	0.279622	0	0	0.012659	0.0179026		679	3823	4502	0.323412	0	0	681	8221	8902	0.519732	0	0	775	2554	3329	0.181408	0	0	0	0
18S	1492	G	3	19	22	68.9928	0.957881	0.986325	5	5	10	132.801	0.980509	0.993201	4	15	19	111.851	0.974649	0.991578	0.990368	0.00293441	1	20	49	69	50.0435	0.947295	0.980683	12	67	79	64.7878	0.952448	0.984987	25	62	87	34.6398	0.918844	0.972251	0.979307	0.00528944	1
18S	1493	G	452	302	754	0.949345	0.0278553	0.487338	634	368	1002	0.276581	0	0.216827	522	793	1315	0.516109	0	0.340588	0.348251	0.110569		1536	988	2524	0.259256	0	0.205945	1162	3494	4656	0.00789493	0	0	776	2354	3130	0.107985	0	0	0.0686484	0.0970835
18S	1494	U	624	879	1503	0.14621	0	0	944	612	1556	0.296011	0	0	860	1071	1931	0.118012	0	0	0	0		2249	754	3003	0.054642	0	0	1961	2327	4288	0.0444522	0	0.0425698	1113	2739	3852	0.328584	0	0	0.0141899	0.0200676
18S	1495	C	908	700	1608	0.224025	0	0	1145	466	1611	0.344858	0	0	1172	832	2004	0.196165	0	0	0	0		2875	593	3468	0.238778	0	0	3210	3210	6420	0.359901	0	0	1492	3001	4493	0.449377	0	0	0	0
18S	1496	U	960	948	1908	0.417805	0	0	1202	355	1557	0.352724	0	0	1317	1665	2982	0.544459	0	0	0	0		2274	1218	3492	0.328632	0	0	3471	1752	5223	0.234446	0	0	1648	2971	4619	0.495709	0	0	0	0
18S	1497	G	405	306	711	0.572113	0	0.364239	546	399	945	0.0909678	0	0.0834635	645	421	1066	0.312756	0	0.238414	0.228706	0.114831		1116	825	1941	0.152992	0	0.132751	1732	1116	2848	0.344589	0	0.256345	603	1468	2071	0.166988	0	0.143153	0.177416	0.0559725
18S	1498	U	252	999	1251	0.240362	0	0	526	606	1132	0.138335	0	0	912	686	1598	0.258627	0	0	0	0		1492	1256	2748	0.291532	0	0	1804	1523	3327	0.021274	0	0.020837	809	1012	1821	0.222344	0	0.181982	0.0676062	0.0813217
18S	1499	G	160	563	723	0.421869	0	0.296989	374	206	580	0.833161	0.143735	0.454921	331	438	769	0.636883	0.0629884	0.389392	0.380434	0.064786		728	518	1246	0.709106	0.149788	0.415094	1236	1239	2475	0.460214	0.0397965	0.315256	429	995	1424	0.555088	0.0587654	0.357111	0.362487	0.0409355
18S	1500	A	74	488	562	0.86343	0.141666	0.463797	121	382	503	1.07725	0.194034	0.51909	220	439	659	0.79436	0.0924761	0.443072	0.47532	0.0320857		268	532	800	1.63161	0.327342	0.620299	987	2491	3478	0.0163744	0	0	373	901	1274	0.58481	0.0330876	0.369192	0.329831	0.254761
18S	1501	U	66	955	1021	0.0361492	0	0	80	648	728	0.359701	0	0.264811	107	711	818	0.335735	0	0.251578	0.17213	0.121834		189	1510	1699	0.176235	0	0.149905	821	1753	2574	0.38636	0	0.278765	296	1118	1414	0.283369	0	0.220922	0.216531	0.0526984
18S	1502	G	68	437	505	1.08904	0.168333	0.521805	93	436	529	0.922411	0.169835	0.480291	106	276	382	1.83072	0.24367	0.64733	0.549809	0.0710102		158	947	1105	0.920906	0.101125	0.479638	713	736	1449	1.58321	0.322739	0.613049	256	418	674	1.67391	0.199371	0.626363	0.573016	0.0662518
18S	1503	C	81	663	744	0.366667	0.0107611	0.268556	129	1421	1550	0.428326	0	0	229	456	685	0.370651	0	0.270708	0.179755	0.127109		234	1179	1413	0.467209	0	0.318587	1578	963	2541	0.418686	0.0310909	0.295204	389	781	1170	0.35417	0	0.261705	0.291832	0.023344
18S	1504	C	161	789	950	0.0876972	0	0.0807045	323	740	1063	0.0928363	0	0	387	537	924	0.0187387	0	0	0.0269015	0.0380445		648	1479	2127	0.0379386	0	0	2823	892	3715	0.0254366	0	0	735	703	1438	0.0749363	0	0.0697574	0.0232525	0.032884
18S	1505	C	273	644	917	0.165904	0	0.14243	399	565	964	0.0683938	0	0.0640777	429	447	876	0.0268846	0	0.0262098	0.0775724	0.0483966		1074	754	1828	0.161266	0	0.138936	3562	649	4211	0.126087	0	0	946	586	1532	0.00393564	0	0.00392276	0.0476197	0.0645904
18S	1506	U	369	986	1355	0.213995	0	0	388	527	915	0.182193	0	0.154257	465	439	904	0.00471455	0	0	0.051419	0.0727174		1197	1311	2508	0.165998	0	0	3490	1213	4703	0.227534	0	0	884	555	1439	0.0680864	0	0.0637876	0.0212625	0.0300698
18S	1507	U	366	1248	1614	0.325057	0	0	515	649	1164	0.0335241	0	0	767	786	1553	0.461612	0	0	0	0		1564	2070	3634	0.44707	0	0	4632	1244	5876	0.423256	0	0	1320	763	2083	0.305859	0	0	0	0
18S	1508	A	368	1419	1787	0.39744	0	0	755	768	1523	0.284442	0	0	733	649	1382	0.3935	0	0	0	0		1606	2666	4272	0.55834	0	0	3476	3119	6595	0.518978	0	0	1810	1713	3523	0.648726	0	0	0	0
18S	1509	G	215	1000	1215	0.0518366	0	0	283	588	871	0.362334	0	0.26619	317	535	852	0.0383744	0	0.036998	0.101063	0.117736		623	1400	2023	0.0270147	0	0.0263168	1932	887	2819	0.226612	0	0.184799	744	520	1264	0.158621	0	0.136998	0.116038	0.0663761
18S	1510	A	275	575	850	0.367306	0	0.268866	263	729	992	0.137776	0	0.121199	296	393	689	0.253043	0	0.202177	0.197414	0.0603787		580	963	1543	0.312126	0	0.237995	1454	1835	3289	0.0539142	0	0	692	568	1260	0.089911	0	0.082554	0.10685	0.0986684
18S	1511	U	272	906	1178	0.08838	0	0	327	1476	1803	0.437799	0	0	243	718	961	0.19292	0	0	0	0		722	1265	1987	0.0771462	0	0	1624	1612	3236	0.144726	0	0	800	346	1146	0.130001	0	0.115134	0.0383779	0.0542746
18S	1512	G	131	815	946	0.116203	0	0.104204	112	908	1020	0.0826205	0	0.0763844	114	320	434	0.816092	0.169153	0.449937	0.210175	0.169917		397	380	777	1.42464	0.262002	0.587879	649	348	997	1.72316	0.307484	0.633012	317	242	559	1.31956	0.175665	0.569323	0.596738	0.0267451
18S	1513	U	95	1053	1148	0.167576	0	0	121	1380	1501	0.323672	0	0	118	559	677	0.0406096	0	0.0390802	0.0130267	0.0184226		325	754	1079	0.564331	0	0.360963	341	599	940	1.53109	0.196303	0.605167	267	344	611	0.97589	0.0629809	0.494308	0.486813	0.0998368
18S	1514	C	174	792	966	0.0734919	0	0	159	416	575	0.932697	0.168765	0.483022	163	383	546	0.187812	0	0.15836	0.213794	0.201051		459	622	1081	0.398295	0	0.285032	365	814	1179	0.782589	0	0.439227	308	512	820	0.36936	0	0.269972	0.33141	0.0764855
18S	1515	C	194	626	820	0.027771	0	0.0270527	179	753	932	0.160105	0	0.138137	126	368	494	0.276925	0	0.217212	0.127467	0.077998		549	513	1062	0.277255	0	0.217231	389	941	1330	0.459379	0	0.314939	410	499	909	0.162027	0	0.139567	0.223912	0.0717512
18S	1516	G	199	319	518	0.602933	0.147538	0.376596	232	473	705	0.570995	0.0126964	0.363789	201	283	484	0.327331	0	0.246992	0.329126	0.0583121		556	624	1180	0.107527	0	0.0971614	537	192	729	1.79846	0.232285	0.642976	411	302	713	0.573452	0.0549085	0.364779	0.368305	0.222842
18S	1517	G	233	273	506	0.620118	0.138052	0.383228	242	503	745	0.508922	0.00310397	0.337575	230	237	467	0.491857	0.0112828	0.330167	0.350323	0.0234627		767	622	1389	0.018705	0	0	874	347	1221	0.773759	0.0320925	0.436427	644	403	1047	0.128446	0	0.113922	0.18345	0.184829
18S	1518	G	473	233	706	0.07157	0	0.0668781	626	614	1240	0.176229	0	0	386	223	609	0.156885	0	0.135802	0.0675602	0.0554432		1545	432	1977	0.324924	0	0	2123	272	2395	0.10646	0	0	1149	354	1503	0.212663	0	0	0	0
18S	1519	G	346	228	574	0.330357	0.0114851	0.248647	363	334	697	0.599204	0.0185495	0.375025	276	161	437	0.835464	0.198194	0.455746	0.359806	0.0852296		746	176	922	0.768906	0.0954795	0.434945	1235	299	1534	0.724292	0.0812995	0.420211	526	259	785	0.824385	0.119416	0.452185	0.43578	0.013067
18S	1520	C	522	209	731	0.00760474	0	0	803	640	1443	0.300246	0	0	457	195	652	0.277386	0.0404688	0.217412	0.0724707	0.102489		1108	167	1275	0.31395	0	0.239079	2618	672	3290	0.152902	0	0	1072	458	1530	0.0583932	0	0	0.0796928	0.112703
18S	1521	U	548	469	1017	0.301757	0	0	907	1046	1953	0.484408	0	0	632	521	1153	0.246495	0	0	0	0		1328	245	1573	0.153127	0	0.132866	2819	1602	4421	0.297462	0	0	1342	1009	2351	0.37329	0	0	0.0442887	0.0626337
18S	1522	G	276	432	708	0.0421094	0	0.0404626	617	244	861	0.29942	0	0.230632	280	760	1040	0.092123	0	0	0.0903648	0.10055		622	608	1230	0.592337	0.074172	0.372182	1975	806	2781	0.284847	0	0.221759	908	588	1496	0.0823499	0	0.0761313	0.223358	0.120867
18S	1523	C	475	426	901	0.188741	0	0	774	523	1297	0.160358	0	0	653	826	1479	0.354024	0	0	0	0		1642	1129	2771	0.304958	0	0	4065	1104	5169	0.27043	0	0	1373	896	2269	0.293696	0	0	0	0
18S	1524	A	213	310	523	0.478287	0.0403997	0.323959	321	308	629	0.82194	0.0884688	0.451528	285	670	955	0.091225	0	0.0836789	0.286389	0.152505		790	1338	2128	0.0164501	0	0	2188	513	2701	0.623349	0.0580493	0.384077	632	490	1122	0.555902	0	0.357491	0.247189	0.175126
18S	1525	C	427	403	830	0.117636	0	0	726	554	1280	0.180961	0	0	477	859	1336	0.243339	0	0	0	0		1848	1535	3383	0.391411	0	0	4436	1352	5788	0.225608	0	0	1430	1256	2686	0.417194	0	0	0	0
18S	1526	G	229	447	676	0.104825	0	0.0950065	363	361	724	0.531065	0.0213107	0.347173	278	700	978	0.0809783	0	0.0749829	0.172387	0.123862		797	899	1696	0.479847	0	0.324384	2993	1196	4189	0.234267	0	0.189839	621	631	1252	0.405764	0	0.288807	0.267677	0.0569235
18S	1527	C	461	693	1154	0.426946	0	0	517	930	1447	0.343677	0	0	499	1027	1526	0.371957	0	0	0	0		1553	1680	3233	0.241957	0	0	4588	1908	6496	0.214805	0	0	1054	1218	2272	0.29717	0	0	0	0
18S	1528	G	191	306	497	0.42017	0.0263567	0.296278	271	395	666	0.446377	0	0.308937	140	763	903	0.0767085	0	0.0713167	0.225511	0.109154		618	1077	1695	0.66818	0.0652256	0.400686	2402	1034	3436	0.675056	0.0911329	0.403075	363	664	1027	0.631604	0.0966128	0.387337	0.397033	0.00692483
18S	1529	C	418	329	747	0.129382	0	0	475	824	1299	0.335846	0	0	332	751	1083	0.182114	0	0	0	0		1404	1255	2659	0.0867335	0	0.0798388	4033	3076	7109	0.21671	0	0	738	987	1725	0.0794837	0	0	0.0266129	0.0376364
18S	1530	G	312	176	488	0.376823	0	0.274098	399	209	608	0.527294	0	0.345619	207	394	601	0.466445	0.0578621	0.31844	0.312719	0.0294774		1245	732	1977	0.592141	0.0986805	0.372033	2947	1878	4825	0.246993	0	0.198104	511	574	1085	0.543401	0.0428203	0.35229	0.307476	0.0777565
18S	1531	C	469	180	649	0.061265	0	0.057812	587	481	1068	0.164494	0	0	302	435	737	0.143586	0	0.125707	0.061173	0.0513746		2245	923	3168	0.0223029	0	0.021823	4480	4057	8537	0.311606	0	0	787	795	1582	0.112915	0	0.101516	0.0411131	0.0436308
18S	1532	U	290	310	600	0.15269	0	0.132656	456	443	899	0.00776543	0	0	267	379	646	0.254577	0	0.203169	0.111941	0.0842266		2327	2603	4930	0.379711	0	0	3679	4644	8323	0.304231	0	0	844	806	1650	0.0573659	0	0.0542847	0.0180949	0.0255901
18S	1533	A	175	162	337	1.11285	0.153724	0.527445	150	161	311	2.07212	0.383129	0.675196	98	262	360	1.247	0.229204	0.555647	0.586096	0.0640465		1405	1199	2604	0.302316	0	0.232206	1620	2747	4367	0.39623	0	0.283832	478	713	1191	0.545805	0.0213907	0.35328	0.289773	0.0496064
18S	1534	C	464	219	683	0.0266407	0	0	433	338	771	0.183117	0	0.154945	310	327	637	0.187269	0	0.15794	0.104295	0.0737577		3577	893	4470	0.292482	0	0	3583	4015	7598	0.284814	0	0	831	784	1615	0.135898	0	0.119704	0.0399015	0.0564292
18S	1535	A	357	108	465	0.546829	0.0405187	0.354007	487	160	647	0.491478	0.0456119	0.329865	357	140	497	0.593039	0.0994914	0.372739	0.352204	0.0175493		2752	725	3477	0.0542074	0	0	2398	2484	4882	0.121062	0	0.108008	860	935	1795	0.0397488	0	0.0382497	0.0487526	0.0447152
18S	1536	C	825	144	969	0.32189	0	0	1086	240	1326	0.347174	0	0	743	268	1011	0.27735	0	0	0	0		4315	443	4758	0.357367	0	0	3762	2698	6460	0.262973	0	0	1653	1013	2666	0.334137	0	0	0	0
18S	1537	U	872	441	1313	0.527947	0	0	959	217	1176	0.237648	0	0	710	353	1063	0.309848	0	0	0	0		4067	556	4623	0.344966	0	0	3911	2763	6674	0.363627	0	0	2108	1558	3666	0.549492	0	0	0	0
18S	1538	G	531	213	744	0.0517673	0	0	786	256	1042	0.093768	0	0	491	387	878	0.111996	0	0	0	0		1435	479	1914	0.742419	0.116728	0.426213	1371	1657	3028	0.334232	0	0.250567	1023	796	1819	0.0207509	0	0.02034	0.232373	0.166196
18S	1539	A	263	144	407	0.945997	0.0292274	0.486738	525	227	752	0.386853	0	0.27921	387	162	549	0.556283	0.0220915	0.357861	0.374603	0.0855458		656	1096	1752	0.915757	0.10854	0.478156	786	1372	2158	0.712377	0.0391368	0.416129	599	705	1304	0.493912	0	0.330786	0.408357	0.0604137
18S	1540	C	638	154	792	0.0594788	0	0.0562066	921	553	1474	0.254132	0	0	900	208	1108	0.214317	0	0	0.0187355	0.026496		1734	686	2420	0.456065	0	0.313306	1569	1242	2811	0.227229	0	0.18521	1497	661	2158	0.104884	0	0	0.166172	0.128613
18S	1541	U	194	577	771	0.110708	0	0.0997898	567	490	1057	0.10648	0	0.0963152	490	542	1032	0.140658	0	0	0.0653683	0.0462442		551	1403	1954	0.798733	0.0273913	0.444179	410	710	1120	1.87113	0.217072	0.651907	748	335	1083	0.880955	0.09076	0.468585	0.521557	0.0927084
18S	1542	G	194	172	366	1.59622	0.235163	0.61547	382	103	485	1.61687	0.250693	0.618351	381	284	665	0.441408	0.00616774	0.306553	0.513458	0.146308		1528	429	1957	0.890943	0.0822772	0.471291	599	418	1017	1.98129	0.184738	0.664794	870	368	1238	0.624285	0.0100016	0.384536	0.506873	0.117149
18S	1543	G	242	190	432	1.26569	0.188779	0.559204	459	184	643	0.996912	0.113442	0.499615	366	122	488	1.05892	0.200877	0.514819	0.524546	0.0252804		1731	1177	2908	0.26918	0	0.212147	397	316	713	3.18005	0.380343	0.761023	610	292	902	1.3118	0.211833	0.567709	0.513626	0.227318
18S	1544	C	872	247	1119	0.147163	0	0	1066	505	1571	0.210609	0	0	882	179	1061	0.0819314	0	0	0	0		4434	707	5141	0.311314	0	0	1444	848	2292	0.227039	0	0.185096	1612	426	2038	0.0557354	0	0	0.0616985	0.0872549
18S	1545	U	1166	393	1559	0.332472	0	0	1229	674	1903	0.297934	0	0	961	227	1188	0.110373	0	0	0	0		4744	1361	6105	0.373349	0	0	3550	1240	4790	0.391544	0	0	2239	736	2975	0.334689	0	0	0	0
18S	1546	C	1409	515	1924	0.435758	0	0	1477	1144	2621	0.503534	0	0	1076	609	1685	0.375096	0	0	0	0		6111	1067	7178	0.472469	0	0	4393	593	4986	0.357122	0	0	2710	548	3258	0.386342	0	0	0	0
18S	1547	A	285	367	652	1.01812	0.0803815	0.504873	383	367	750	1.04038	0.0305598	0.510227	221	341	562	1.17	0.18128	0.539613	0.518238	0.0152717		1224	806	2030	1.13532	0	0.53181	885	1028	1913	1.07999	0.0723742	0.519359	593	955	1548	0.452866	0	0.311844	0.454337	0.100886
18S	1548	G	698	381	1079	0.239599	0	0.193432	762	218	980	0.574244	0	0.365011	679	310	989	0.223569	0	0.18287	0.247104	0.083484		4283	968	5251	0.256184	0	0	1993	666	2659	0.574737	0	0.36506	1182	625	1807	0.238532	0	0.192679	0.185913	0.149112
18S	1549	C	699	449	1148	0.247529	0	0.198554	827	606	1433	0.0998373	0	0.0908322	926	403	1329	0.069858	0	0	0.0964621	0.0811571		3385	479	3864	0.0464626	0	0.0444106	2728	2047	4775	0.0882468	0	0	1799	1227	3026	0.299163	0	0	0.0148035	0.0209354
18S	1550	G	1289	276	1565	0.0542784	0	0	1033	612	1645	0.00704739	0	0.00700229	1045	287	1332	0.0259648	0	0	0.0023341	0.00330091		3041	447	3488	0.140199	0	0.122991	2945	2012	4957	0.0202254	0	0	1175	841	2016	0.121842	0	0.108657	0.0772161	0.0549127
18S	1551	U	1873	582	2455	0.415812	0	0	1619	1208	2827	0.443336	0	0	1619	592	2211	0.445454	0	0	0	0		4899	1911	6810	0.496975	0	0	3940	3617	7557	0.348137	0	0	1735	1947	3682	0.45361	0	0	0	0
18S	1552	G	986	274	1260	0.233439	0	0.18938	860	217	1077	0.612245	0.000535433	0.379965	731	323	1054	0.263444	0	0.208669	0.259338	0.085659		1401	379	1780	1.05334	0.116544	0.513129	1959	3046	5005	0.0454677	0	0.0434986	636	661	1297	0.638136	0.0344154	0.389733	0.315454	0.19879
18S	1553	U	1644	122	1766	0.186028	0	0	1090	332	1422	0.132467	0	0.117044	999	393	1392	0.123634	0	0	0.0390148	0.0551753		1335	58	1393	1.4283	0.189354	0.588362	2144	5468	7612	0.359306	0	0	765	1765	2530	0.290417	0	0	0.196121	0.277357
18S	1554	G	1232	211	1443	0.0233303	0	0.0228138	1375	122	1497	0.0885922	0	0.0814323	952	301	1253	0.0290005	0	0	0.0347487	0.034299		1617	224	1841	0.806201	0.0637701	0.446486	922	2207	3129	0.756794	0.0440985	0.43086	518	453	971	0.933836	0.119666	0.48315	0.453499	0.0219158
18S	1555	C	1433	214	1647	0.140217	0	0	1531	255	1786	0.102686	0	0	1015	342	1357	0.147562	0	0	0	0		2286	992	3278	0.081434	0	0	1302	4217	5519	0.0449114	0	0	741	859	1600	0.0527379	0	0.0501257	0.0167086	0.0236295
18S	1556	C	1440	235	1675	0.187815	0	0	1909	449	2358	0.364453	0	0	1013	228	1241	0.108901	0	0	0	0		1800	1281	3081	0.0289639	0	0	1934	5764	7698	0.355859	0	0	1032	703	1735	0.102976	0	0	0	0
18S	1557	U	1382	399	1781	0.298416	0	0	1852	492	2344	0.39755	0	0	1060	359	1419	0.299499	0	0	0	0		2197	2262	4459	0.381986	0	0	1448	5319	6767	0.285312	0	0	980	779	1759	0.175063	0	0	0	0
18S	1558	A	503	448	951	0.254972	0.0356812	0.20334	750	205	955	0.515377	0.0486175	0.340333	437	197	634	0.504567	0.124811	0.335708	0.293127	0.0635173		1197	556	1753	0.635354	0.0820595	0.388647	546	2376	2922	0.691097	0.117337	0.408751	507	361	868	0.608337	0.052967	0.37851	0.391969	0.0125671
18S	1559	C	414	295	709	0.608388	0.143904	0.378591	597	176	773	0.826859	0.148298	0.452933	266	180	446	1.0224	0.225722	0.506097	0.445874	0.0522928		906	2009	2915	0.0532198	0	0	610	2347	2957	0.556611	0	0.357656	387	420	807	0.668949	0.0446531	0.401118	0.252925	0.179723
18S	1560	C	581	283	864	0.186101	0	0.157055	706	489	1195	0.0965069	0	0.0880802	360	231	591	0.364002	0	0.267194	0.170776	0.0737638		1209	1814	3023	0.0800338	0	0	1349	2597	3946	0.0520789	0	0.0495129	580	369	949	0.328842	0	0.247661	0.0990581	0.107005
18S	1561	C	501	335	836	0.143502	0	0.125625	707	517	1224	0.0298776	0	0.0290338	491	223	714	0.0480342	0	0.0458939	0.0668508	0.0421255		1060	1815	2875	0.0383171	0	0	1641	2841	4482	0.0930825	0	0	526	329	855	0.576597	0.0342355	0.365994	0.121998	0.172531
18S	1562	U	442	429	871	0.00332569	0	0	514	582	1096	0.0918971	0	0.0842331	400	469	869	0.197344	0	0	0.0280777	0.0397079		1106	2075	3181	0.192353	0	0	1985	2954	4939	0.246046	0	0	625	1415	2040	0.399673	0	0	0	0
18S	1563	A	239	408	647	0.24916	0	0.199709	304	429	733	0.539843	0.0167564	0.350893	207	267	474	0.484047	0	0.32663	0.292411	0.0662945		608	1652	2260	0.106207	0	0.0960482	1127	1683	2810	0.268505	0	0.21173	361	719	1080	0.223497	0	0.182809	0.163529	0.0491551
18S	1564	C	161	408	569	0.305867	0.057461	0.234541	332	988	1320	0.25516	0	0	191	383	574	0.165469	0	0.142188	0.125576	0.0964686		772	2067	2839	0.224081	0	0	1659	2083	3742	0.16431	0	0	339	1065	1404	0.0716093	0	0	0	0
18S	1565	G	182	549	731	0.0245143	0	0	354	502	856	0.235252	0	0.190629	115	326	441	0.627728	0.11463	0.386183	0.192271	0.157663		497	1645	2142	0.0374294	0	0.0360952	149	992	1141	1.90851	0.349748	0.656379	188	556	744	0.98601	0.161525	0.496814	0.396429	0.26299
18S	1566	C	208	549	757	0.0493111	0	0	299	863	1162	0.106506	0	0	156	355	511	0.458876	0.0879148	0.314962	0.104987	0.148475		450	1763	2213	0.0410469	0	0	1061	2179	3240	0.0852412	0	0	403	1023	1426	0.0512575	0	0.0487908	0.0162636	0.0230002
18S	1567	C	159	626	785	0.0899774	0	0	324	944	1268	0.203441	0	0	171	727	898	0.189717	0	0	0	0		469	1355	1824	0.149065	0	0.129789	559	4077	4636	0.433412	0	0	522	1845	2367	0.387096	0	0	0.0432631	0.0611833
18S	1568	G	306	325	631	0.206136	0	0.17113	418	421	839	0.306481	0	0.234799	196	839	1035	0.272619	0	0	0.13531	0.0991464		590	565	1155	0.896078	0.172964	0.472811	718	1318	2036	0.34061	0.00377326	0.254164	464	1088	1552	0.0574158	0	0.0543313	0.260436	0.170901
18S	1569	G	294	193	487	0.620879	0.147534	0.383536	311	314	625	0.798545	0.14497	0.44439	259	380	639	0.266441	0	0.210646	0.34619	0.0990121		484	487	971	1.31113	0.276291	0.567565	468	1370	1838	0.373766	0.00883816	0.272182	386	730	1116	0.518482	0.0578998	0.341649	0.393798	0.126102
18S	1570	C	377	244	621	0.320597	0.0510789	0.243062	364	619	983	0.189408	0	0.159382	391	548	939	0.117175	0	0	0.134148	0.100821		738	612	1350	0.821079	0.118695	0.451058	762	1260	2022	0.219542	0	0.180093	586	1156	1742	0.00924332	0	0	0.210384	0.185385
18S	1571	A	432	427	859	0.00421189	0	0.00419908	622	778	1400	0.182013	0	0	527	543	1070	0.193962	0	0	0.00139969	0.00197947		1073	987	2060	0.254159	0	0.202732	844	1432	2276	0.0564485	0	0.0534546	1007	1200	2207	0.199909	0	0	0.0853954	0.0857911
18S	1572	G	263	697	960	0.0142329	0	0	443	682	1125	0.113085	0	0.101677	363	446	809	0.175885	0	0.149734	0.0838035	0.0624214		821	1798	2619	0.0691645	0	0.0647134	924	1231	2155	0.199196	0	0.166172	739	1271	2010	0.0355047	0	0	0.0769619	0.0683902
18S	1573	G	421	422	843	0.222512	0	0.182189	454	495	949	0.38048	0.00736856	0.275824	373	375	748	0.330559	0.0524804	0.248686	0.235566	0.0393362		738	2066	2804	0.0490038	0	0.0467305	753	1268	2021	0.297324	0	0.22927	538	914	1452	0.425113	0.0652819	0.298445	0.191482	0.106179
18S	1574	C	495	840	1335	0.150067	0	0	897	1045	1942	0.314313	0	0	542	631	1173	0.117812	0	0	0	0		1409	2401	3810	0.18276	0	0	1569	689	2258	0.228129	0	0.185821	1140	1153	2293	0.103749	0	0	0.0619402	0.0875967
18S	1575	G	550	324	874	0.537168	0.0242679	0.349713	590	378	968	0.606158	0.0277883	0.377639	389	345	734	0.554679	0.0773975	0.357093	0.361482	0.0118154		1133	2389	3522	0.0359889	0	0	829	1001	1830	0.667182	0.138508	0.400317	753	850	1603	0.383777	0.0515234	0.277465	0.225927	0.167442
18S	1576	C	508	675	1183	0.239818	0	0.193562	862	1200	2062	0.257737	0	0	481	726	1207	0.0531917	0	0	0.0645206	0.0912459		2629	3310	5939	0.43619	0	0	1326	1637	2963	0.0474321	0	0.0452988	1264	1207	2471	0.121036	0	0	0.0150996	0.0213541
18S	1577	G	821	623	1444	0.146774	0	0.128066	879	377	1256	0.403509	0	0.287663	665	543	1208	0.017719	0	0.0174246	0.144385	0.110926		2414	2009	4423	0.135498	0	0	1396	2078	3474	0.0612982	0	0	1171	1353	2524	0.125619	0	0	0	0
18S	1578	G	1260	700	1960	0.090668	0	0	1220	558	1778	0.00583974	0	0.00580908	840	475	1315	0.0171817	0	0	0.00193636	0.00273843		2863	1695	4558	0.119636	0	0	2070	2313	4383	0.24263	0	0	1463	1573	3036	0.300446	0	0	0	0
18S	1579	G	949	412	1361	0.528496	0.0960074	0.345928	885	393	1278	0.568873	0.0760465	0.362781	639	333	972	0.501439	0.0686472	0.334201	0.347637	0.01173		1579	568	2147	1.1182	0.233207	0.528018	1638	1593	3231	0.130305	0	0.115314	955	1126	2081	0.0770253	0	0.0715486	0.238294	0.205644
18S	1580	U	2526	457	2983	0.304193	0	0	2426	729	3155	0.394423	0	0	1526	737	2263	0.378558	0	0	0	0		3759	687	4446	0.00386028	0	0	3563	3157	6720	0.506636	0	0	2272	895	3167	0.340246	0	0	0	0
18S	1581	A	2022	426	2448	0.0742389	0	0	1642	393	2035	0.0417867	0	0.0401296	982	549	1531	0.0254859	0	0.0248684	0.021666	0.0165386		2241	1067	3308	0.408217	0.0379384	0.289944	2346	1751	4097	0.10552	0	0	1449	717	2166	0.0280008	0	0	0.0966481	0.136681
18S	1582	A	1389	813	2202	0.10641	0	0.0962158	1286	455	1741	0.323772	0.00934972	0.244689	543	551	1094	0.590563	0.11779	0.371505	0.23747	0.112502		1049	2659	3708	0.286858	0.00815065	0.22296	1465	1340	2805	0.373291	0.00505874	0.271893	689	667	1356	0.587955	0.129539	0.370431	0.288428	0.0613297
18S	1583	C	2425	906	3331	0.28223	0	0	2070	773	2843	0.204106	0	0	1195	778	1973	0.146955	0	0	0	0		1662	4545	6207	0.280335	0	0	2005	1733	3738	0.00652878	0	0	1295	735	2030	0.0289786	0	0	0	0
18S	1584	C	1731	1004	2735	0.101888	0	0	1501	595	2096	0.158666	0	0.136995	1089	696	1785	0.0408175	0	0	0.0456649	0.0645799		1589	3919	5508	0.165156	0	0	1488	1783	3271	0.123513	0	0.109964	894	644	1538	0.265865	0	0.210134	0.1067	0.0858181
18S	1585	C	2238	1295	3533	0.352031	0	0	1939	1157	3096	0.255771	0	0	1497	926	2423	0.34014	0	0	0	0		2066	4849	6915	0.365192	0	0	2188	2037	4225	0.205161	0	0	1275	963	2238	0.227696	0	0	0	0
18S	1586	G	1538	959	2497	0.0648741	0	0	1298	927	2225	0.0793651	0	0.07356	922	803	1725	0.0498519	0	0	0.02452	0.0346765		1219	3343	4562	0.0133002	0	0.0131285	1637	646	2283	0.498472	0.030183	0.332751	808	595	1403	0.241065	0	0.194352	0.180077	0.130875
18S	1587	U	1098	1108	2206	0.0179781	0	0	1265	1283	2548	0.13407	0	0	810	1140	1950	0.242406	0	0	0	0		1257	3154	4411	0.00515513	0	0	1605	1613	3218	0.0931242	0	0	739	474	1213	0.310315	0	0.236974	0.0789912	0.11171
18S	1588	U	738	1634	2372	0.168661	0	0	1080	1973	3053	0.334607	0	0	598	1755	2353	0.438398	0	0	0	0		1191	3950	5141	0.203254	0	0	1232	2203	3435	0.232767	0	0	622	1206	1828	0.233619	0	0	0	0
18S	1589	G	581	1406	1987	0.0756707	0	0	766	2032	2798	0.304676	0	0	422	914	1336	0.00418017	0	0.00416587	0.00138862	0.00196381		1116	2795	3911	0.011895	0	0.0117582	792	2632	3424	0.27248	0	0	463	1018	1481	0.0732869	0	0	0.00391939	0.00554285
18S	1590	A	248	857	1105	0.533424	0.121048	0.34807	274	1733	2007	0.0821436	0	0	100	735	835	0.489806	0.0977175	0.329036	0.225702	0.159784		359	3678	4037	0.12996	0	0	337	2441	2778	0.148379	0	0	254	1583	1837	0.33936	0	0	0	0
18S	1591	A	123	853	976	0.54648	0.0795042	0.353604	235	980	1215	0.454404	0.0898973	0.31261	43	430	473	1.46017	0.293126	0.594034	0.420083	0.124135		87	3077	3164	0.0194804	0	0.0191141	175	1498	1673	0.365804	0.0143453	0.267948	89	1013	1102	0.0752594	0	0.0700509	0.119038	0.107329
18S	1592	C	124	1004	1128	0.132625	0	0.117187	170	1176	1346	0.140139	0	0.122994	80	564	644	0.576882	0.0209336	0.366197	0.202126	0.11604		136	2008	2144	0.359933	0.0909615	0.26476	194	1517	1711	0.203797	0	0.169377	143	1066	1209	0.145225	0	0	0.144712	0.109486
18S	1593	C	69	633	702	0.680243	0.128855	0.405191	47	515	562	1.64468	0.336727	0.622301	98	334	432	1.24991	0.18236	0.556109	0.527867	0.0908564		176	1198	1374	0.991572	0.250489	0.498066	98	456	554	2.86306	0.480108	0.741484	85	345	430	1.54898	0.275288	0.60824	0.61593	0.0995236
18S	1594	C	189	769	958	0.0723555	0	0.0675391	239	468	707	0.855069	0.110095	0.461288	251	333	584	0.488946	0	0.328761	0.285863	0.163584		371	1588	1959	0.219943	0	0.180365	347	326	673	1.92113	0.299311	0.658001	152	343	495	1.08398	0.120989	0.520653	0.453007	0.200775
18S	1595	C	345	540	885	0.0515927	0	0.0491142	310	769	1079	0.0552366	0	0.0523912	439	369	808	0.0364236	0	0	0.0338351	0.0239624		589	1154	1743	0.241017	0	0.194299	499	1553	2052	0.166142	0	0	227	595	822	0.141299	0	0.123937	0.106079	0.0803211
18S	1596	A	280	477	757	0.148505	0.00863609	0.129451	312	714	1026	0.0125717	0	0	383	299	682	0.140784	0	0.123569	0.08434	0.0596857		642	1032	1674	0.189997	0	0.159742	514	1634	2148	0.268849	0	0	223	487	710	0.264791	0	0.209589	0.12311	0.089399
18S	1597	U	266	513	779	0.101795	0	0.0924977	323	648	971	0.00488112	0	0	525	435	960	0.207504	0	0	0.0308326	0.0436038		692	1121	1813	0.017953	0	0.0176459	453	1052	1505	0.0528552	0	0.0502335	303	156	459	0.915725	0.0649276	0.478547	0.182142	0.210012
18S	1598	U	388	487	875	0.00925926	0	0.0091847	411	414	825	0.23223	0	0.188649	565	464	1029	0.209558	0	0	0.0659445	0.086846		805	1197	2002	0.0455539	0	0	514	1370	1884	0.160908	0	0	310	380	690	0.294742	0	0.2279	0.0759667	0.107433
18S	1599	C	367	401	768	0.285306	0	0.2222	560	657	1217	0.156805	0	0	637	469	1106	0.223326	0	0	0.0740666	0.104746		1226	875	2101	0.0651602	0	0	712	2006	2718	0.457153	0	0	525	1335	1860	0.58025	0	0	0	0
18S	1600	G	346	322	668	0.727919	0.0864482	0.421634	345	393	738	0.617546	0.0838733	0.382099	368	240	608	0.662945	0.089517	0.399051	0.400928	0.0161944		698	444	1142	0.900496	0.167072	0.47404	372	474	846	1.11249	0.162165	0.526919	290	467	757	0.347625	0	0.258207	0.419722	0.116231
18S	1601	U	550	346	896	0.494475	0.00393174	0.331116	558	742	1300	6.83235e-05	0	6.83714e-05	490	531	1021	0.0508915	0	0.0484721	0.126552	0.145992		1219	588	1807	0.190683	0	0.160221	536	1240	1776	0.0159695	0	0.0157272	455	645	1100	0.0139671	0	0	0.0586493	0.0721082
18S	1602	G	460	347	807	0.897635	0.170716	0.473337	375	214	589	1.53168	0.312521	0.60541	334	392	726	0.617607	0.0976407	0.382128	0.486958	0.0916621		832	624	1456	0.519599	0	0.342086	255	561	816	1.36728	0.262968	0.577873	286	292	578	1.04713	0.0927472	0.511943	0.477301	0.0993275
18S	1603	A	686	389	1075	0.572098	0.114817	0.364123	555	547	1102	0.439297	0.0661797	0.305409	400	365	765	0.630882	0.134761	0.387145	0.352225	0.0344127		1268	782	2050	0.053329	0	0.0506525	320	1155	1475	0.30868	0	0.235993	350	475	825	0.511528	0	0.338689	0.208445	0.119193
18S	1604	U	1074	582	1656	0.111694	0	0.100527	869	919	1788	0.0694056	0	0	538	804	1342	0.0592206	0	0	0.033509	0.0473888		1327	3456	4783	0.585835	0	0	362	1900	2262	0.131772	0	0	640	875	1515	0.161353	0	0	0	0
18S	1605	G	2015	572	2587	0.246935	0	0	1406	655	2061	0.11692	0	0	843	577	1420	0.0697944	0	0	0	0		1538	1228	2766	0.184343	0	0	685	743	1428	0.526452	0.0800885	0.345044	681	453	1134	0.274714	0	0.215659	0.186901	0.142324
18S	1606	G	2382	583	2965	0.282996	0	0	1659	529	2188	0.107517	0	0	1326	621	1947	0.321766	0	0	0	0		1365	1087	2452	0.070082	0	0	1529	1021	2550	0.151039	0	0	913	1242	2155	0.333612	0	0	0	0
18S	1607	G	3387	344	3731	0.402968	0	0	2581	631	3212	0.391389	0	0	1793	397	2190	0.370587	0	0	0	0		1763	340	2103	0.122888	0	0.109485	2413	765	3178	0.275296	0	0	1068	934	2002	0.222755	0	0	0.0364951	0.0516119
18S	1608	G	2498	45	2543	0.0350585	0	0	1708	301	2009	0.0786014	0	0.0729071	1354	44	1398	0.0613216	0	0.0578174	0.0435749	0.0314219		1014	46	1060	1.29613	0.144875	0.564715	1871	219	2090	0.20499	0	0.170185	735	206	941	0.829877	0.0643919	0.453779	0.396226	0.166128
18S	1609	A	1873	370	2243	0.132135	0	0.116759	1510	990	2500	0.134111	0	0	1174	190	1364	0.084534	0	0.0779977	0.0649189	0.0485556		829	207	1036	1.29094	0.106296	0.563734	1579	1287	2866	0.105534	0	0	711	1055	1766	0.0461297	0	0	0.187911	0.265747
18S	1610	U	1015	1624	2639	0.0464099	0	0	1047	1227	2274	0.0336996	0	0	687	917	1604	0.0983247	0	0	0	0		522	3353	3875	0.472423	0	0	1396	1466	2862	0.0652501	0	0	541	1107	1648	0.0513038	0	0.0488283	0.0162761	0.0230179
18S	1611	C	372	2307	2679	0.0720232	0	0	527	2206	2733	0.229558	0	0	152	1228	1380	0.0376619	0	0.0363203	0.0121068	0.0171216		484	2050	2534	0.171378	0	0	814	2116	2930	0.0748664	0	0	257	2150	2407	0.321286	0	0	0	0
18S	1612	G	745	2231	2976	0.205972	0	0	646	1772	2418	0.148918	0	0	392	1062	1454	0.045063	0	0	0	0		531	1503	2034	0.0708654	0	0.0662062	1143	2188	3331	0.191483	0	0	672	2251	2923	0.458888	0	0	0.0220687	0.0312099
18S	1613	G	289	2526	2815	0.213625	0	0	256	1544	1800	0.113153	0	0.101702	217	1533	1750	0.286649	0	0	0.0339006	0.0479427		340	2035	2375	0.0953657	0	0	658	2666	3324	0.222018	0	0	332	1374	1706	0.0424917	0	0	0	0
18S	1614	G	237	1511	1748	0.229731	0.0274913	0.186901	182	1738	1920	0.0326161	0	0	183	887	1070	0.151084	0	0.13136	0.106087	0.0783669		435	942	1377	0.731471	0.0205405	0.422633	716	1412	2128	0.231152	0	0.187824	364	770	1134	0.434567	0.0212271	0.303112	0.304523	0.0958657
18S	1615	G	339	1242	1581	0.269567	0	0.212436	161	1208	1369	0.32884	0.0544851	0.2476	139	521	660	0.823332	0.174596	0.451928	0.303988	0.10559		358	353	711	2.54885	0.405459	0.718503	424	2014	2438	0.0168785	0	0.016605	261	841	1102	0.434703	0.0287052	0.303183	0.346097	0.288151
18S	1616	A	260	1529	1789	0.0290627	0	0.0282572	210	1233	1443	0.156987	0	0.135767	230	814	1044	0.0518873	0	0.0493727	0.0711324	0.0465095		487	2113	2600	0.0822846	0	0	590	2360	2950	0.228796	0	0	357	793	1150	0.30335	0	0.232901	0.0776338	0.109791
18S	1617	U	323	1496	1819	0.076862	0	0	240	1415	1655	0.0820115	0	0	200	907	1107	0.0729242	0	0	0	0		565	2602	3167	0.281015	0	0	561	2062	2623	0.176613	0	0	450	793	1243	0.129484	0	0.114721	0.0382405	0.0540802
18S	1618	U	357	1481	1838	0.185016	0	0	350	1023	1373	0.0149846	0	0.014774	255	1103	1358	0.300491	0	0	0.00492467	0.00696453		678	2563	3241	0.297227	0	0	617	1313	1930	0.0803786	0	0.0744342	521	1142	1663	0.251616	0	0	0.0248114	0.0350886
18S	1619	G	270	696	966	0.441216	0.0234344	0.306361	205	769	974	0.323464	0	0.244597	130	422	552	0.759393	0.12948	0.432066	0.327675	0.0780038		465	2035	2500	0.0620907	0	0	349	629	978	1.0626	0.258636	0.515431	287	869	1156	0.0200903	0	0.0197113	0.178381	0.238466
18S	1620	C	494	975	1469	0.226357	0	0	336	1504	1840	0.424962	0	0	322	711	1033	0.189963	0	0	0	0		994	3035	4029	0.486377	0	0	658	1378	2036	0.155359	0	0	619	801	1420	0.253898	0	0	0	0
18S	1621	A	357	384	741	0.446631	0.00339405	0.309026	219	895	1114	0.11137	0	0	241	332	573	0.438463	0	0.305183	0.204737	0.144779		646	880	1526	0.474183	0	0.321801	444	688	1132	0.488399	0.0288465	0.328332	433	384	817	0.28806	0	0.223851	0.291328	0.0477877
18S	1622	A	358	510	868	0.0610536	0	0.057603	325	464	789	0.144079	0	0.126074	362	389	751	0.0105053	0	0.0104098	0.0646955	0.0474852		838	1006	1844	0.145504	0	0.127082	572	815	1387	0.0975744	0	0.0889585	531	553	1084	0.126738	0	0	0.0720136	0.0532467
18S	1623	U	441	527	968	0.199002	0	0	313	506	819	0.0586314	0	0	343	500	843	0.183899	0	0	0	0		1138	1083	2221	0.15418	0	0	631	840	1471	0.0731884	0	0	530	219	749	0.208667	0	0.172833	0.0576109	0.0814741
18S	1624	U	280	352	632	0.0882394	0	0.0812024	328	263	591	0.120364	0	0.107595	256	693	949	0.356573	0	0	0.0629326	0.0457859		1138	951	2089	0.206263	0	0	646	993	1639	0.249634	0	0	555	374	929	0.145054	0	0	0	0
18S	1625	A	142	213	355	0.714513	0.0969179	0.417428	165	186	351	0.688226	0.0119849	0.408349	121	419	540	0.0896077	0	0.0823783	0.302719	0.155848		989	479	1468	0.0278194	0	0.0270843	565	817	1382	0.104676	0	0	396	609	1005	0.3222	0	0	0.00902811	0.0127677
18S	1626	U	91	157	248	1.34096	0.17545	0.57381	92	88	180	2.17833	0.17436	0.686563	115	477	592	0.0557991	0	0	0.420124	0.300618		572	286	858	0.678373	0.0267023	0.404465	300	774	1074	0.219938	0	0.180424	282	133	415	0.679487	0.104799	0.40516	0.330016	0.105778
18S	1627	U	32	95	127	3.75747	0.374792	0.791103	31	33	64	7.75915	0.551328	0.887392	37	108	145	3.1675	0.46188	0.761299	0.813265	0.0538096	1	302	78	380	2.98583	0.255429	0.749605	152	346	498	1.87809	0.343755	0.653002	154	82	236	1.85996	0.322715	0.651306	0.684638	0.0459439
18S	1628	C	50	171	221	1.95811	0.159696	0.662956	41	168	209	1.82862	0.0695087	0.647561	44	193	237	1.53235	0.210576	0.606116	0.638878	0.0240033		339	235	574	1.70663	0.041963	0.630942	227	679	906	0.644971	0.0649402	0.39235	169	216	385	0.708549	0.0315179	0.415338	0.479543	0.107466
18S	1629	C	119	294	413	0.719673	0	0.419083	62	179	241	1.75354	0.167926	0.637788	79	301	380	0.57247	0	0.364667	0.473846	0.118034		677	283	960	0.661868	0	0.398517	622	271	893	0.804499	0.146939	0.446106	246	162	408	0.635262	0.0152902	0.389059	0.411227	0.0249634
18S	1630	C	209	270	479	0.751667	0.0382162	0.429626	116	136	252	1.96311	0.334921	0.663402	164	234	398	0.61306	0.000151851	0.380652	0.491227	0.123377		488	226	714	1.45888	0.116182	0.593649	1034	61	1095	0.560381	0.118314	0.359341	272	64	336	1.11217	0.188769	0.527293	0.493428	0.0986075
18S	1631	C	282	294	576	0.853553	0.0717205	0.460927	275	294	569	0.571267	0.0618155	0.363977	329	219	548	0.350921	0	0.260115	0.361673	0.0819972		758	285	1043	0.989112	0.059574	0.497503	1849	212	2061	0.143124	0	0	374	92	466	0.647633	0.0899351	0.39358	0.297028	0.214272
18S	1632	A	257	573	830	0.530953	0.0365743	0.347085	254	800	1054	0.0522801	0	0	312	300	612	0.359416	0	0.264708	0.203931	0.148071		1261	400	1661	0.349592	0	0.259151	1640	482	2122	0.114257	0	0	357	555	912	0.152501	0	0	0.0863837	0.122165
18S	1633	U	468	1437	1905	0.274163	0	0	429	1340	1769	0.375951	0	0	394	915	1309	0.35475	0	0	0	0		2326	2970	5296	0.588555	0	0	2647	469	3116	0.342067	0	0	763	339	1102	0.208754	0	0	0	0
18S	1634	G	220	1342	1562	0.0324803	0	0.031478	187	1430	1617	0.203083	0	0	203	536	739	0.386276	0	0.278915	0.103464	0.124726		1197	1157	2354	0.172909	0	0.147472	1825	661	2486	0.0943305	0	0	451	526	977	0.0167576	0	0	0.0491574	0.069519
18S	1635	A	245	1397	1642	0.0525056	0	0.0499151	293	1211	1504	0.0826873	0	0	233	632	865	0.243726	0	0.196146	0.0820205	0.0832323		1530	1009	2539	0.174431	0	0.148574	1555	1025	2580	0.0845366	0	0	460	746	1206	0.167633	0	0	0.0495246	0.0700384
18S	1636	A	217	2216	2433	0.280476	0	0	163	1154	1317	0.119272	0	0.106634	209	1149	1358	0.207244	0	0	0.0355447	0.0502678		1486	1637	3123	0.00320458	0	0.00319536	1159	1088	2247	0.141424	0	0.12395	429	611	1040	0.0776177	0	0.0720914	0.0664123	0.0494612
18S	1637	C	350	3191	3541	0.519882	0	0	254	2355	2609	0.471132	0	0	236	2180	2416	0.589358	0	0	0	0		3408	2926	6334	0.530953	0	0	1653	1379	3032	0.122285	0	0	577	1092	1669	0.313147	0	0	0	0
18S	1638	G	340	2253	2593	0.298591	0	0	177	1446	1623	0.0844212	0	0	209	1122	1331	0.165023	0	0	0	0		1618	849	2467	0.407753	0	0.289731	1003	746	1749	0.648489	0.0955462	0.39352	384	748	1132	0.135314	0	0.119279	0.26751	0.113056
18S	1639	A	440	1969	2409	0.261166	0	0	316	1712	2028	0.325946	0	0	239	962	1201	0.098826	0	0	0	0		2810	1544	4354	0.271601	0	0	1306	3494	4800	0.465908	0	0	535	1203	1738	0.295751	0	0	0	0
18S	1640	G	122	1445	1567	0.131463	0	0.116254	122	1614	1736	0.247073	0	0	88	1168	1256	0.19695	0	0	0.0387512	0.0548025		728	1485	2213	0.428997	0	0.300304	410	991	1401	1.26419	0.168353	0.558518	206	524	730	0.947895	0.16042	0.486967	0.448596	0.108851
18S	1641	G	737	55	792	1.25854	0.255239	0.557547	499	39	538	1.54444	0.309823	0.60743	495	53	548	0.957397	0.12978	0.489573	0.551517	0.0483034		3084	72	3156	0.0689614	0	0	2208	85	2293	0.528766	0	0.345976	901	100	1001	0.528676	0.0219921	0.346065	0.23068	0.163116
18S	1642	A	601	681	1282	0.31312	0	0.238597	409	507	916	0.399079	0	0.285467	362	380	742	0.455989	0	0.313472	0.279178	0.0308892		3101	253	3354	0.156228	0	0	2088	1316	3404	0.208037	0	0.172253	870	819	1689	8.54701e-05	0	0	0.0574176	0.0812007
18S	1643	A	805	551	1356	0.175027	0	0.149049	577	486	1063	0.15825	0	0.136739	471	315	786	0.400141	0	0.286046	0.190611	0.0676693		2931	748	3679	0.280631	0	0	2927	1213	4140	0.207373	0	0.17179	1259	464	1723	0.14708	0	0.128286	0.100026	0.0729245
18S	1644	U	522	491	1013	0.474633	0.0233182	0.322081	372	339	711	0.62809	0.0380783	0.386116	350	252	602	0.769836	0.0534961	0.435384	0.381194	0.0463867		1499	506	2005	0.247928	0	0.198751	2136	671	2807	1.05903	0.0770598	0.514422	1013	557	1570	0.357501	0	0.263476	0.32555	0.136142
18S	1645	U	442	335	777	0.881834	0.180386	0.468924	344	144	488	1.36664	0.241005	0.57796	231	150	381	2.09488	0.359917	0.677459	0.574781	0.0851638		823	221	1044	1.41344	0.3036	0.585886	1796	539	2335	1.91362	0.348058	0.656881	603	268	871	1.80801	0.326523	0.64414	0.628969	0.0309052
18S	1646	C	810	605	1415	0.0604363	0	0	686	413	1099	0.0598687	0	0	613	208	821	0.467883	0.0208617	0.319011	0.106337	0.150383		1097	482	1579	0.448488	0.0330882	0.30976	5498	1227	6725	0.0296214	0	0.0287733	1985	521	2506	0.0237823	0	0	0.112845	0.139735
18S	1647	C	1047	624	1671	0.228874	0	0	957	370	1327	0.252753	0	0	968	296	1264	0.0129469	0	0	0	0		851	779	1630	0.398631	0.0191134	0.28514	8484	772	9256	0.186497	0	0	2600	545	3145	0.15688	0	0	0.0950467	0.134416
18S	1648	C	1364	607	1971	0.367168	0	0	1139	453	1592	0.389921	0	0	1735	389	2124	0.425673	0	0	0	0		1932	762	2694	0.243735	0	0	12508	802	13310	0.440175	0	0	4083	644	4727	0.453269	0	0	0	0
18S	1649	A	1293	475	1768	0.306011	0	0	1019	345	1364	0.276353	0	0	1808	312	2120	0.408481	0	0	0	0		1765	618	2383	0.158963	0	0	14820	622	15442	0.5297	0	0	4458	519	4977	0.481449	0	0	0	0
18S	1650	G	1038	239	1277	0.0457225	0	0	562	220	782	0.27914	0	0.218443	942	155	1097	0.254807	0	0.203212	0.140552	0.0995793		1015	623	1638	0.235747	0	0.190867	7557	201	7758	0.032719	0	0.0316863	1928	239	2167	0.31251	0	0.238185	0.153579	0.0883296
18S	1651	U	1085	335	1420	0.179482	0	0	875	291	1166	0.186947	0	0	2106	275	2381	0.486099	0	0	0	0		1887	361	2248	0.114184	0	0	11580	375	11955	0.388039	0	0	2844	449	3293	0.189091	0	0	0	0
18S	1652	A	730	130	860	0.383688	0.0751287	0.277527	577	203	780	0.255641	0	0.203802	1373	136	1509	0.131405	0	0	0.160443	0.117375		1357	628	1985	0.0489426	0	0.0466814	6551	436	6987	0.0838612	0	0.0773829	2200	467	2667	0.0013285	0	0.00132724	0.0417972	0.0312411
18S	1653	A	769	155	924	0.218174	0	0.179258	791	255	1046	0.117192	0	0	1532	132	1664	0.255255	0	0	0.0597528	0.0845032		1800	839	2639	0.234996	0	0	8881	384	9265	0.27428	0	0	2988	516	3504	0.3189	0	0	0	0
18S	1654	G	456	110	566	0.907995	0.186495	0.47633	381	146	527	0.737837	0.105316	0.425035	561	112	673	0.851962	0.18488	0.460401	0.453922	0.0214363		667	396	1063	1.01212	0.206121	0.503248	2303	281	2584	1.57736	0.313988	0.612098	1049	251	1300	0.820907	0.130511	0.451014	0.52212	0.0671028
18S	1655	U	440	308	748	0.307195	0	0.235243	552	272	824	0.0109226	0	0	465	190	655	0.691362	0.0884834	0.409129	0.214791	0.167651		721	1488	2209	0.142272	0	0	1179	430	1609	2.61168	0.405188	0.723245	908	593	1501	0.335619	0	0.251409	0.324885	0.2998
18S	1656	G	493	201	694	0.328969	2.05413e-05	0.247805	239	83	322	1.57203	0.303926	0.611939	446	173	619	0.590824	0.0161525	0.371772	0.410505	0.151159		572	1745	2317	0.22681	0	0	2336	343	2679	0.767475	0.023418	0.434313	740	229	969	0.8137	0.0702771	0.448896	0.294403	0.208259
18S	1657	C	719	377	1096	0.239208	0	0	585	419	1004	0.263626	0	0	383	339	722	0.240526	0	0.194106	0.0647022	0.0915027		1037	1414	2451	0.31088	0	0	1661	1796	3457	0.190042	0	0.159733	1175	765	1940	0.236842	0	0	0.0532442	0.0752987
18S	1658	G	709	220	929	0.121995	0	0	611	166	777	0.0416024	0	0	489	341	830	0.0842359	0	0	0	0		933	1072	2005	0.182198	0	0	2007	1605	3612	0.0490051	0	0	814	474	1288	0.0491337	0	0.0468673	0.0156224	0.0220935
18S	1659	G	966	230	1196	0.369609	0	0	984	188	1172	0.418717	0	0	513	427	940	0.298016	0	0	0	0		1371	481	1852	0.174408	0	0	2305	2441	4746	0.392561	0	0	869	456	1325	0.121971	0	0	0	0
18S	1660	G	528	144	672	0.157157	0	0.135988	346	139	485	0.489758	0.0180347	0.329205	321	202	523	0.177799	0	0.151204	0.205465	0.0877171		401	283	684	1.2005	0.252545	0.545921	883	1764	2647	0.00819906	0	0	264	306	570	0.830648	0.174302	0.45418	0.333367	0.238683
18S	1661	U	508	310	818	0.0964727	0	0	401	232	633	0.0965825	0	0.0882028	337	282	619	0.0815591	0	0	0.0294009	0.0415792		636	251	887	0.651639	0.0834721	0.39481	678	2277	2955	0.17344	0	0	285	415	700	0.341021	0	0.25457	0.21646	0.163418
18S	1662	C	499	230	729	0.00549467	0	0	479	193	672	0.0421496	0	0.0405026	442	126	568	0.00208944	0	0	0.0135009	0.0190931		699	379	1078	0.280816	0	0.219406	883	1522	2405	0.0144546	0	0.0142545	389	503	892	0.0544979	0	0	0.0778869	0.100238
18S	1663	A	318	195	513	0.465499	0.0511614	0.318061	420	214	634	0.16035	0	0.138379	250	124	374	0.630193	0.0232726	0.387209	0.281216	0.104872		488	300	788	0.721546	0.0781129	0.419436	558	773	1331	0.837871	0.169838	0.456079	311	292	603	0.408996	0	0.290616	0.38871	0.0709577
18S	1664	U	489	245	734	0.0103553	0	0	612	181	793	0.0845508	0	0	343	227	570	0.081008	0	0.075059	0.0250197	0.0353832		685	770	1455	0.0514728	0	0	772	1075	1847	0.245972	0	0.197499	490	348	838	0.0502847	0	0	0.0658331	0.0931021
18S	1665	A	257	134	391	1.05147	0.173136	0.513184	417	106	523	0.454538	0.00976832	0.312907	123	134	257	1.5506	0.233158	0.608861	0.478317	0.123313		369	475	844	1.02907	0	0.50746	516	477	993	1.2759	0.210074	0.560861	251	227	478	0.732661	0.0575	0.423363	0.497228	0.0565978
18S	1666	A	264	217	481	0.740595	0.120853	0.425991	338	133	471	0.779096	0.0854584	0.438439	115	156	271	1.54988	0.283817	0.608702	0.491044	0.0833517		421	476	897	1.30662	0.12423	0.566739	696	623	1319	0.721237	0.0419738	0.419207	280	270	550	0.697358	0	0.411289	0.465745	0.0714865
18S	1667	G	303	220	523	0.717006	0.146624	0.418055	388	118	506	0.786325	0.122535	0.440678	244	107	351	1.08005	0.21328	0.519953	0.459562	0.0436899		407	1484	1891	0.180385	0	0.152887	941	607	1548	0.532379	0.00816267	0.347566	256	142	398	1.66511	0.259288	0.625369	0.375274	0.193882
18S	1668	C	448	259	707	0.331999	0.0520455	0.249513	571	608	1179	0.2471	0	0	640	246	886	0.173631	0	0	0.0831712	0.117622		620	1134	1754	0.413213	0	0.292511	1624	860	2484	0.0179924	0	0.0176814	478	329	807	0.4397	0	0.305674	0.205289	0.132767
18S	1669	U	458	670	1128	0.126995	0	0	572	432	1004	0.0358651	0	0	591	683	1274	0.375512	0	0	0	0		484	1034	1518	0.792422	0	0.442258	1639	868	2507	0.253823	0	0.202504	554	508	1062	0.23742	0	0.192013	0.278925	0.115573
18S	1670	U	617	678	1295	0.19399	0	0	612	542	1154	0.14406	0	0	655	654	1309	0.277269	0	0	0	0		553	3562	4115	0.373297	0	0	1826	1547	3373	0.0828986	0	0.0765735	721	1009	1730	0.189351	0	0	0.0255245	0.0360971
18S	1671	G	339	1245	1584	0.331518	0	0	362	367	729	0.4614	0	0.316021	397	328	725	0.56659	0	0.361989	0.226003	0.160907		338	5471	5809	0.576036	0	0	914	835	1749	1.57572	0.263819	0.611895	377	696	1073	0.528678	0.0203001	0.346051	0.319315	0.250519
18S	1672	C	591	1057	1648	0.32109	0	0	578	1615	2193	0.576866	0	0	704	525	1229	0.00167118	0	0.00166975	0.000556583	0.000787128		567	5774	6341	0.611088	0	0	1588	3891	5479	0.113404	0	0	507	2564	3071	0.479742	0	0	0	0
18S	1673	G	312	902	1214	0.0165249	0	0.0162695	309	832	1141	0.0536291	0	0	440	331	771	0.855843	0.150302	0.461484	0.159251	0.213814		173	2517	2690	0.0642636	0	0.0604042	1095	2627	3722	0.607136	0.0862554	0.377838	353	1373	1726	0.139664	0	0.122611	0.186951	0.137346
18S	1674	U	417	745	1162	0.0424668	0	0.0407705	388	655	1043	0.00306513	0	0.00305869	565	485	1050	0.369003	0	0.269729	0.104519	0.117831		200	1775	1975	0.376423	0	0.27358	1137	4712	5849	0.0392289	0	0.0377543	372	1884	2256	0.131197	0	0	0.103778	0.121053
18S	1675	U	570	915	1485	0.198721	0	0	464	641	1105	0.0883564	0	0	791	1039	1830	0.240694	0	0	0	0		282	1678	1960	0.334399	0	0.250695	1369	9523	10892	0.432542	0	0	367	2375	2742	0.243784	0	0	0.0835648	0.118179
18S	1676	G	411	646	1057	0.123314	0	0.10987	424	316	740	0.346469	0	0.257575	442	2058	2500	0.465916	0	0	0.122481	0.105532		192	826	1018	1.54127	0.173914	0.60673	736	7591	8327	0.167118	0	0	232	1729	1961	0.159593	0	0.137689	0.24814	0.259718
18S	1677	A	379	535	914	0.270213	0	0.212913	284	559	843	0.110742	0	0.0998078	300	1664	1964	0.291654	0	0	0.10424	0.086978		86	1248	1334	0.703038	0	0.412996	739	8145	8884	0.193405	0	0	241	1885	2126	0.0867889	0	0.0798927	0.164296	0.178856
18S	1678	U	251	1008	1259	0.162663	0	0	246	601	847	0.0678066	0	0.063571	282	1883	2165	0.387109	0	0	0.0211903	0.0299677		91	2115	2206	0.168011	0	0	548	8935	9483	0.227943	0	0	200	2237	2437	0.0472199	0	0	0	0
18S	1679	U	268	1297	1565	0.390954	0	0	315	794	1109	0.304705	0	0	371	1603	1974	0.365384	0	0	0	0		140	1928	2068	0.26164	0	0	571	11126	11697	0.406682	0	0	202	3027	3229	0.330244	0	0	0	0
18S	1680	A	5	22	27	37.754	0.935542	0.975095	6	23	29	27.407	0.91564	0.965931	2	15	17	76.3543	0.963349	0.987782	0.976269	0.0089592	1	3	54	57	27.6239	0.900479	0.965646	4	790	794	9.12187	0.758258	0.901316	1	375	376	5.58523	0.659987	0.848487	0.90515	0.0479067	1
18S	1681	A	230	1142	1372	0.346063	0	0	235	898	1133	0.385224	0	0	146	764	910	0.305598	0	0.234265	0.0780882	0.110433		222	2405	2627	0.494106	0	0	410	9522	9932	0.330045	0	0	156	3371	3527	0.418884	0	0	0	0
18S	1682	G	67	518	585	0.597251	0.0388412	0.374324	76	468	544	0.324669	0	0.245434	86	1157	1243	0.169141	0	0	0.206586	0.155266		44	1628	1672	0.170485	0	0	194	6648	6842	0.0802669	0	0	92	2655	2747	0.274519	0	0	0	0
18S	1683	U	29	965	994	0.140748	0	0	45	740	785	0.104806	0	0	56	1051	1107	0.198125	0	0	0	0		43	1045	1088	0.336884	0	0.252165	128	6294	6422	0.102626	0	0	91	2336	2427	0.206658	0	0	0.084055	0.118872
18S	1684	C	45	704	749	0.143378	0	0.125545	46	640	686	0.0346595	0	0.0335457	43	351	394	1.12478	0.0603411	0.529995	0.229695	0.21564		50	925	975	0.487158	0	0.327803	141	5323	5464	0.041291	0	0	75	1713	1788	0.0465002	0	0.0444578	0.124087	0.145188
18S	1685	C	55	803	858	0.0706636	0	0	29	620	649	0.0929231	0	0.0851424	53	348	401	0.784798	0	0.440326	0.175156	0.190698		29	994	1023	0.340289	0	0.254077	211	4472	4683	0.00874134	0	0	116	1656	1772	0.0257379	0	0	0.0846924	0.119773
18S	1686	C	149	617	766	0.0135448	0	0	85	500	585	0.23066	0	0.187688	126	324	450	0.382336	0	0.277031	0.154906	0.115448		96	1179	1275	0.0181296	0	0.0178205	418	3429	3847	0.0367146	0	0.0354233	194	1426	1620	0.0369182	0	0	0.0177479	0.0144616
18S	1687	U	134	813	947	0.202907	0	0	137	602	739	0.0139189	0	0.0137462	186	364	550	0.135794	0	0.11975	0.0444986	0.0535056		250	1423	1673	0.232749	0	0	569	2901	3470	0.0865329	0	0.0796624	299	903	1202	0.285979	0	0.222526	0.10073	0.0920593
18S	1688	G	78	621	699	0.0304444	0	0.029586	85	313	398	0.952771	0.244931	0.488534	91	744	835	0.339474	0	0	0.172707	0.22365		123	1106	1229	0.00446251	0	0	420	855	1275	1.5917	0.318259	0.614339	164	264	428	2.29106	0.431378	0.69664	0.436993	0.310822
18S	1689	C	140	500	640	0.131028	0	0.116009	215	858	1073	0.316139	0	0	173	323	496	0.111089	0	0.100163	0.0720573	0.0513612		234	1265	1499	0.236681	0	0	888	1471	2359	0.141266	0	0.123826	466	619	1085	0.0924698	0	0.0847143	0.0695136	0.051682
18S	1690	C	217	433	650	0.105154	0	0.0952815	227	591	818	0.0108262	0	0	180	188	368	0.548118	0.00813418	0.354675	0.149986	0.149873		301	1114	1415	0.163222	0	0	1023	1127	2150	0.0917506	0	0.0840757	547	570	1117	0.028712	0	0	0.0280252	0.0396337
18S	1691	C	294	285	579	0.230747	0	0.187748	420	343	763	0.0874636	0	0.0805259	350	147	497	0.183266	0	0.155145	0.14114	0.0448797		516	448	964	0.297536	0	0.229492	1330	375	1705	0.236206	0	0.191164	849	320	1169	0.138063	0	0	0.140218	0.100377
18S	1692	U	324	349	673	0.0414936	0	0.0398973	543	509	1052	0.186293	0	0	308	256	564	0.155438	0	0.134733	0.0582102	0.0565084		641	539	1180	0.0503152	0	0.0479435	1170	786	1956	0.00806223	0	0	802	304	1106	0.112928	0	0	0.0159812	0.0226008
18S	1693	U	279	356	635	0.114623	0	0.102981	409	391	800	0.123845	0	0.11032	309	210	519	0.328761	0	0.247778	0.153693	0.0665954		468	339	807	0.547181	0.0717217	0.353946	641	256	897	1.17219	0.188514	0.539911	526	231	757	0.289666	0	0.224835	0.372897	0.129325
18S	1694	U	256	157	413	0.831428	0.215423	0.454577	427	292	719	0.319877	0	0.242609	245	140	385	1.00371	0.186226	0.501575	0.399587	0.112647		529	166	695	0.762005	0.126828	0.432818	667	155	822	1.3932	0.26727	0.582444	503	67	570	0.780171	0.137131	0.438688	0.48465	0.0691926
18S	1695	G	344	462	806	0.0934462	0	0	439	509	948	0.0111111	0	0	234	445	679	0.120082	0	0.107349	0.035783	0.0506048		496	479	975	0.186532	0	0.157344	692	544	1236	0.612189	0.0759984	0.379916	480	341	821	0.253569	0	0.202474	0.246578	0.0960675
18S	1696	U	523	574	1097	0.330854	0	0	634	758	1392	0.371373	0	0	543	648	1191	0.373434	0	0	0	0		901	1048	1949	0.491926	0	0	1112	1106	2218	0.13787	0	0	701	458	1159	0.145345	0	0	0	0
18S	1697	A	249	314	563	0.466509	0.0531985	0.318494	402	253	655	0.465617	0	0.318024	240	615	855	0.0251038	0	0	0.212173	0.150029		421	1081	1502	0.348828	0	0	647	1319	1966	0.0128622	0	0.0127053	434	403	837	0.255091	0	0.203439	0.072048	0.093052
18S	1698	C	500	370	870	0.057316	0	0	623	892	1515	0.434807	0	0	504	989	1493	0.487216	0	0	0	0		848	629	1477	0.381777	0	0	998	2360	3358	0.461907	0	0	784	647	1431	0.330424	0	0	0	0
18S	1699	A	328	440	768	0.0561335	0	0.0532155	244	330	574	0.564618	0	0.361268	222	453	675	0.229964	0	0.187193	0.200559	0.126117		275	465	740	0.207302	0	0.171899	571	1599	2170	0.145591	0	0	377	502	879	0.104091	0	0.0943746	0.088758	0.0702899
18S	1700	C	695	523	1218	0.35479	0	0	705	578	1283	0.359103	0	0	541	799	1340	0.451819	0	0	0	0		662	288	950	0.161608	0	0	981	2380	3361	0.498701	0	0	843	641	1484	0.406599	0	0	0	0
18S	1701	A	262	476	738	0.230868	0	0.187771	286	174	460	1.22172	0	0.550435	172	417	589	0.39064	0	0.28125	0.339819	0.15374		186	223	409	0.976396	0.114579	0.494639	323	1423	1746	0.0518858	0	0.0493533	417	653	1070	0.115053	0	0	0.181331	0.222457
18S	1702	C	510	527	1037	0.147013	0	0	501	263	764	0.326391	0	0.246317	249	481	730	0.0470436	0	0.0449887	0.0971019	0.107098		270	162	432	0.695715	0	0.410838	277	1570	1847	0.0690176	0	0	466	396	862	0.0891979	0	0.0819804	0.164273	0.177531
18S	1703	C	395	545	940	0.0605384	0	0	628	197	825	0.226002	0	0.184523	261	576	837	0.179382	0	0	0.0615077	0.086985		307	120	427	0.458178	0	0.314717	301	1598	1899	0.186333	0	0	661	638	1299	0.365889	0	0	0.104906	0.148359
18S	1704	G	430	439	869	0.036424	0	0.0351829	499	302	801	0.324037	0	0.244965	141	234	375	0.872813	0.0813458	0.466707	0.248952	0.176191		157	117	274	1.1078	0.073822	0.52648	218	165	383	3.07433	0.473708	0.755044	315	133	448	0.949196	0.123976	0.487525	0.589683	0.118004
18S	1705	C	2	49	51	18.0519	0.865401	0.948469	7	10	17	63.4728	0.946976	0.985339	3	53	56	10.871	0.786859	0.917116	0.950308	0.027882	1	4	45	49	10.4251	0.784992	0.914074	2	13	15	86.666	0.966788	0.989298	13	15	28	28.3429	0.900077	0.967057	0.95681	0.0315536	1
18S	1706	C	753	343	1096	0.18114	0	0	1075	234	1309	0.156166	0	0	320	198	518	0.208264	0	0.172641	0.0575471	0.081384		339	138	477	0.210855	0	0.174439	410	559	969	0.242096	0	0.195071	448	114	562	0.392402	0	0.282176	0.217229	0.0466909
18S	1707	C	1514	177	1691	0.499166	0	0	2660	310	2970	0.672549	0	0	708	187	895	0.363132	0	0	0	0		717	127	844	0.259119	0	0	772	728	1500	0.306618	0	0	1140	186	1326	0.496693	0	0	0	0
18S	1708	G	872	70	942	0.0122894	0	0	1111	173	1284	0.0587635	0	0	451	93	544	0.142263	0	0.124745	0.0415818	0.0588055		438	123	561	0.314176	0	0.239391	766	224	990	0.0839108	0	0.077487	616	74	690	0.0578228	0	0.054737	0.123872	0.0822107
18S	1709	U	604	176	780	0.192246	0	0.161421	911	188	1099	0.12799	0	0.113559	377	142	519	0.211004	0	0.174516	0.149832	0.0262002		340	191	531	0.584252	0	0.369225	546	384	930	0.17329	0	0.147831	452	29	481	0.595897	0	0.373879	0.296979	0.10548
[truncated: 5,169 more rows]

## Sheet: E16.5 brain KO115_116 vs WT
Data_handling_v3			Brain_E16.5_wt_1_ACTAGA						Brain_E16.5_wt_2_AGCTTG						Brain_E16.5_wt_3_CGCAAT						Average			Brain_E16.5_SNORD115_SNORD116_KO_1_CAAGAG						Brain_E16.5_SNORD115_SNORD116_KO_2_TACTGT						Brain_E16.5_SNORD115_SNORD116_KO_3_GTAGTG						Average
[truncated: 8,277 more rows]
