# Supplementary material for: Reassessment of the involvement of Snord115 in the serotonin 2c receptor pathway in a genetically relevant mouse model
Source: eLife. 2020 Oct 5;9:e60862. doi: 10.7554/eLife.60862 (PMC7673782; doi:10.7554/eLife.60862)
Supplement: Supplementary file 3. — Raw data are available on Sequence Read Archive (SRA) database under the accession number PRJNA608249. [file elife-60862-supp3.xlsx]

## Sheet: 200603_Supplementary data 2_MA
	GeneSymbol	KOp44	KOp46	KOp50	KOp51	WTp42	WTp43	KOp52	WTp53	NormCounts.KOp44	NormCounts.KOp46	NormCounts.KOp50	NormCounts.KOp51	NormCounts.WTp42	NormCounts.WTp43	NormCounts.KOp52	NormCounts.WTp53	DESeq2.baseMean	DESeq2.log2FoldChange	DESeq2.lfcSE	DESeq2.stat	DESeq2.pvalue	DESeq2.padj
ENSMUSG00000064377	Gm24966	0	0	0	0	55	80	0	81	0	0	0	0	59.0051638872611	81.7406323986091	0	81.5203124258469	27.7832635889646	-8.69249118209287	0.957678614336825	-9.07662659681741	1.12e-19	3.2e-15
ENSMUSG00000058626	Capn11	24	25	19	28	22	111	26	150	20.3362089030024	26.1041900470472	19.8138645489957	27.5544402412338	23.6020655549045	113.41512745307	25.1295723431405	150.963541529346	50.8648763275925	-2.01545317801907	0.414951610432841	-4.85708002414238	1.19e-06	0.017024195132199
ENSMUSG00000099021	Rn7s1	14	10	8	7	35	28	8	29	11.8627885267514	10.4416760188189	8.34267981010344	6.88861006030846	37.5487406555298	28.6092213395132	7.73217610558169	29.1862846956736	17.5765221515351	-1.80346921803733	0.389158661910176	-4.63427746715195	3.58e-06	0.023334685305366
ENSMUSG00000079845	Xlr4a	10	7	8	17	13	85	19	74	8.473420376251	7.30917321317321	8.34267981010344	16.7294815750348	13.9466751006254	86.8494219235221	18.3639182507565	74.4753471544774	29.311264675493	-2.30340063700252	0.499961861516767	-4.60715269363656	4.08e-06	0.023334685305366
ENSMUSG00000093994	Gm26498	1	0	0	0	14	7	0	11	0.8473420376251	0	0	0	15.0194962622119	7.15230533487829	0	11.070659712152	4.26122541835842	-5.37166662765988	1.15535886166422	-4.64934905153396	3.33e-06	0.023334685305366
ENSMUSG00000030091	Nup210	2128	1638	1404	1698	1059	1261	1645	1310	1803.14385606621	1710.34653188253	1464.14030667315	1670.97998320054	1136.11761012017	1288.43671818308	1589.92871171024	1318.41492935629	1497.68858089903	0.401368379512307	0.088757592920841	4.52207373255682	6.12e-06	0.029170111416853
ENSMUSG00000052192	Gm5963	69	94	56	85	205	124	73	115	58.4666005961319	98.1517545768974	58.398758670724	83.6474078751742	219.928338125246	126.697980217844	70.556106963433	115.738715172499	103.948207774744	-1.06250265977797	0.242889062446359	-4.37443600414331	1.22e-05	0.045751024585267
ENSMUSG00000061863	Gm6822	27	30	18	24	66	64	22	38	22.8782350158777	31.3250280564566	18.7710295727327	23.6180916353433	70.8061966647134	65.3925059188873	21.2634842903497	38.2440971874343	36.5373335427244	-1.30254107642861	0.298515572623377	-4.36339406008798	1.28e-05	0.045751024585267
ENSMUSG00000058809	Hspd1-ps3	160	141	103	139	223	217	148	174	135.574726020016	147.227631865346	107.412002555082	136.788114054697	239.239119033804	221.721465381227	143.045257953261	175.117708174041	163.265753129684	-0.660120788662345	0.15531788742012	-4.25012726883661	2.14e-05	0.061063045393951
ENSMUSG00000083061	Gm12191	75	91	63	99	178	139	93	121	63.5506528218825	95.0192517712518	65.6986035045646	97.4246279957911	190.962166762409	142.024348792583	89.8865472273872	121.777256833672	108.292931963693	-0.881874294253333	0.207117865166991	-4.25783789120418	2.06e-05	0.061063045393951
ENSMUSG00000107383	Gm4366	343	384	278	363	640	471	358	423	290.638318905409	400.960359122645	289.908123401094	357.223635984567	686.605543415402	481.247973246811	346.014880724781	425.717187112756	409.789502739183	-0.656771687410479	0.158896284376384	-4.13333571636424	3.58e-05	0.061241578791743
ENSMUSG00000082896	Gm5844	255	344	168	307	525	502	337	389	216.072219594401	359.193655047369	175.196276012172	302.1147555021	563.231109832947	512.922468301272	325.717918447629	391.498784366104	355.743398387999	-0.827961745165054	0.199664547546762	-4.14676393650277	3.37e-05	0.061241578791743
ENSMUSG00000044751	Atp5pb-ps	77	79	49	66	167	124	73	89	65.2453368971327	82.4892405486691	51.0989138368835	64.9497519971941	179.161133984957	126.697980217844	70.556106963433	89.571701307412	91.2212707191906	-0.977450122729061	0.232128573483353	-4.21081346454385	2.54e-05	0.061241578791743
ENSMUSG00000090467	Gm4613	120	141	81	162	332	210	148	183	101.681044515012	147.227631865346	84.4696330772973	159.422118538567	356.17662564674	214.569160046349	143.045257953261	184.175520665802	173.845874038547	-0.984295251499145	0.234458646260926	-4.19816145489357	2.69e-05	0.061241578791743
ENSMUSG00000096726	Gm5558	31	46	21	45	98	67	33	63	26.2676031663781	48.0317096865668	21.8995345015215	44.2839218162687	105.136473835483	68.4577796338351	31.8952264355245	63.4046874423254	51.1721170647379	-1.19822116396577	0.290192948988832	-4.1290498895336	3.64e-05	0.061241578791743
ENSMUSG00000059031	Olfr482	36	44	17	47	116	96	59	67	30.5043133545036	45.9433744828031	17.7281945964698	46.252096119214	124.447254744042	98.0887588783309	57.024798778665	67.4303818831079	60.927396604642	-1.29034187360542	0.31143283541937	-4.14324286605124	3.42e-05	0.061241578791743
ENSMUSG00000108873	Gm44609	5	7	3	6	33	21	7	14	4.2367101881255	7.30917321317321	3.12850492878879	5.90452290883582	35.4030983323567	21.4569160046349	6.76565409238398	14.089930542739	12.2868137763797	-2.11304273827687	0.511555688989035	-4.13062113032657	3.62e-05	0.061241578791743
ENSMUSG00000115662	Gm7232	114	179	75	148	270	275	151	189	96.5969922892614	186.906000736858	78.2126232197197	145.64489841795	289.661713628373	280.983423870219	145.944823992854	190.214062326976	176.770567310276	-0.957943574898565	0.236812863212753	-4.04515008983253	5.23e-05	0.083027190268206
ENSMUSG00000061684	Rpl21-ps8	60	70	31	66	147	108	61	81	50.840522257506	73.0917321317321	32.3278842641508	64.9497519971941	157.704710753225	110.349853738122	58.9578428050604	81.5203124258469	78.7178262966047	-1.05515122089126	0.265116623177052	-3.97995119373032	6.89e-05	0.103687984449552
ENSMUSG00000090553	Snrpe	693	569	594	638	889	712	594	719	587.208032074194	594.131365470794	619.44397590018	627.847602639543	953.738012650457	727.491628347621	574.114075839441	723.618575730665	675.949158581612	-0.416194595912148	0.105950683762226	-3.92819169384662	8.56e-05	0.111189158370978
ENSMUSG00000083899	Gm12346	642	681	524	652	942	925	676	695	543.993588155314	711.078136881565	546.445527561775	641.62482276016	1010.59753421455	945.126062108917	653.368880921653	699.46440908597	718.962370211237	-0.515293974101798	0.13116015832442	-3.92873857949484	8.54e-05	0.111189158370978
ENSMUSG00000099891	Gm5575	16	27	11	22	58	48	21	34	13.5574726020016	28.192525250811	11.4711847388922	21.649917332398	62.2236273720208	49.0443794391654	20.2969622771519	34.2184027466518	30.0818089698866	-1.35288652205716	0.343293662478177	-3.94090153686762	8.12e-05	0.111189158370978
ENSMUSG00000099250	Rn7s2	8	10	9	13	40	24	11	23	6.7787363010008	10.4416760188189	9.38551478636636	12.7931329691443	42.9128464634626	24.5221897195827	10.6317421451748	23.1477430344997	17.5766976797563	-1.59710657505907	0.407912456809667	-3.91531699607861	9.03e-05	0.112193479514861
ENSMUSG00000038393	Txnip	1080	896	945	1065	663	590	843	783	915.129400635108	935.574171286171	985.479052568468	1048.05281631836	711.280430131893	602.837163939742	814.778057125671	788.029686783187	850.145097348575	0.423204983448591	0.10911290184569	3.87859708879431	0.000105060595929	0.120109475689895
ENSMUSG00000113061	Rps18-ps5	74	130	55	109	233	172	104	138	62.7033107842574	135.741788244645	57.3559236944611	107.265499510517	249.96733064967	175.74235965701	100.518289372562	138.886458206998	128.522620015015	-1.02281128890491	0.263120239918897	-3.88723911630735	0.000101390864581	0.120109475689895
ENSMUSG00000091989	Ndufab1-ps	33	45	25	38	86	78	54	62	27.9622872416283	46.9875420846849	26.0708744065732	37.3953117559602	92.2626198964447	79.6971165886439	52.1921887126764	62.3982638321297	53.1207755648427	-1.03664831267404	0.268105806692642	-3.86656419516664	0.00011037941866	0.121336698642853
ENSMUSG00000084106	Gm6136	239	271	162	272	458	342	254	302	202.514746992399	282.969420109992	168.939266154595	267.671705200557	491.352092006647	349.441203504054	245.496591352219	303.939930279083	289.040619449943	-0.70824502740752	0.183699616788036	-3.85545185009687	0.000115516066339	0.122280173778653
ENSMUSG00000019278	Dpep1	20	19	16	11	1	0	1	0	16.946840752502	19.8391844357559	16.6853596202069	10.824958666199	1.07282116158657	0	0.966522013197712	0	8.291960831181	5.13883244422544	1.35056367984311	3.80495382848026	0.000141830644588	0.141775675591694
ENSMUSG00000091845	Rpl36-ps12	114	145	77	153	289	189	130	167	96.5969922892614	151.404302272874	80.2982931722456	150.565334175313	310.045315698518	193.112244041714	125.647861715703	168.072742902672	159.467885783538	-0.888008053005251	0.233597442574197	-3.80144595428606	0.000143854119596	0.141775675591694
ENSMUSG00000079507	H2-Q1	74	64	13	20	9	5	11	6	62.7033107842574	66.8267265204408	13.5568546914181	19.6817430294527	9.65539045427909	5.10878952491307	10.6317421451748	6.03854166117384	24.2753873513887	2.32853187041584	0.624823176741933	3.72670534175396	0.000193999030986	0.146294961892845
ENSMUSG00000103897	Pcdhga8	367	286	290	288	142	240	303	220	310.974527808412	298.63193413822	302.42214311625	283.41709962412	152.340604945292	245.221897195827	292.856169998907	221.413194243041	263.409696383759	0.527251827206521	0.142508936855887	3.69978079157033	0.000215785773329	0.146294961892845
ENSMUSG00000045799	Gm9800	190	196	141	218	307	275	183	220	160.994987148769	204.65684996885	147.039731653073	214.530999021035	329.356096607076	280.983423870219	176.873528415181	221.413194243041	216.981101365905	-0.616519387592313	0.163677117686265	-3.7666803784635	0.000165432571548	0.146294961892845
ENSMUSG00000084319	Tpt1-ps3	370	407	283	359	648	511	390	404	313.516553921287	424.976213965928	295.122298282409	353.287287378677	695.188112708095	522.118289446115	376.943585147108	406.595138519039	423.468434921082	-0.617582288472115	0.163767140732804	-3.77110014688317	0.000162529425281	0.146294961892845
ENSMUSG00000081603	Gm14681	89	117	74	131	227	184	140	146	75.4134413486339	122.167609420181	77.1697882434568	128.915416842915	243.53040368015	188.003454516801	135.31308184768	146.937847088564	139.681380373548	-0.839638770247723	0.225820450332727	-3.71816976279423	0.000200671403369	0.146294961892845
ENSMUSG00000084235	Gm15421	103	137	78	124	278	180	133	141	87.2762298753853	143.050961457819	81.3411281485085	122.026806782607	298.244282921065	183.91642289687	128.547427755296	141.905729037585	148.288623609392	-0.887601421677124	0.240042688122216	-3.69768156081142	0.000217577591908	0.146294961892845
ENSMUSG00000078180	Gm20900	78	127	63	112	210	172	93	123	66.0926789347578	132.609285439	65.6986035045646	110.217760964935	225.292443933179	175.74235965701	89.8865472273872	123.790104054064	123.666222964362	-0.91477001280219	0.247161459461346	-3.70110297453254	0.000214664332945	0.146294961892845
ENSMUSG00000089988	Gm16238	104	169	76	148	307	195	128	175	88.1235719130104	176.464324718039	79.2554581959826	145.64489841795	329.356096607076	199.24279147161	123.714817689307	176.124131784237	164.740761349652	-0.938514233970045	0.25441520351376	-3.688907820791	0.000225218793019	0.146294961892845
ENSMUSG00000109171	Gm5735	40	34	22	42	91	59	37	51	33.893681505004	35.5016984639842	22.9423694777844	41.3316603618508	97.6267257043775	60.2837163939742	35.7613144883153	51.3276041199777	47.3335963144085	-1.03704767210976	0.279809919722772	-3.70625770929506	0.000210344271472	0.146294961892845
ENSMUSG00000071419	Rps15-ps2	29	50	26	37	95	70	53	67	24.5729190911279	52.2083800940944	27.1137093828362	36.4112246044876	101.918010350724	71.5230533487829	51.2256666994787	67.4303818831079	54.0504181818299	-1.070869875976	0.284335738689078	-3.76621623758313	0.000165740259383	0.146294961892845
ENSMUSG00000114551	Gm6035	39	73	28	61	139	85	56	89	33.0463394673789	76.2242349373778	29.199379335362	60.0293162398309	149.122141460533	86.8494219235221	54.1252327390719	89.571701307412	72.270970926311	-1.10508056528688	0.29847544721967	-3.70241698464924	0.00021355524835	0.146294961892845
ENSMUSG00000098281	Gm27529	18	22	15	18	40	38	15	34	15.2521566772518	22.9716872414015	15.6425246439439	17.7135687265075	42.9128464634626	38.8268003893393	14.4978301979657	34.2184027466518	25.2544771358155	-1.17086456728312	0.317154286686884	-3.69178225372395	0.000222688081648	0.146294961892845
ENSMUSG00000108366	Gm5586	24	40	20	43	103	65	40	51	20.3362089030024	41.7667040752755	20.8566995252586	42.3157475133234	110.500579643416	66.4142638238699	38.6608805279085	51.3276041199777	49.022336016504	-1.21625361560546	0.324702705113959	-3.74574525080905	0.000179859037695	0.146294961892845
ENSMUSG00000093686	Gm4705	20	36	14	41	90	53	26	49	16.946840752502	37.590033667748	14.599689667681	40.3475732103781	96.5539045427909	54.1531689640785	25.1295723431405	49.3147568995864	41.8294425059882	-1.3107789726078	0.354707068666091	-3.69538441265663	0.000219554347816	0.146294961892845
ENSMUSG00000065952	Rps23rg1	21	21	13	19	64	38	16	26	17.7941827901271	21.9275196395196	13.5568546914181	18.6976558779801	68.6605543415402	38.8268003893393	15.4643522111634	26.1670138650867	27.6368667257718	-1.34581114874443	0.361983042938353	-3.71788451144001	0.000200898068064	0.146294961892845
ENSMUSG00000065037	Rn7sk	106	87	58	61	165	156	116	109	89.8182559882606	90.8425813637242	60.4844286232499	60.0293162398309	177.015491661783	159.394233177288	112.116553530935	109.700173511325	107.42512926205	-0.844303351132363	0.229910189550551	-3.67231810292046	0.000240360227811	0.152660792690063
ENSMUSG00000105031	Gm3511	42	65	19	56	157	92	69	82	35.5883655802542	67.8708941223227	19.8138645489957	55.1088804824677	168.432922369091	94.0017272584004	66.6900189106421	82.5267360360425	73.754176163527	-1.23009288219557	0.335762627962519	-3.66357890888584	0.000248715547341	0.154533457794871
ENSMUSG00000083624	Gm12469	10	8	4	9	42	17	3	14	8.473420376251	8.3533408150551	4.17133990505172	8.85678436325374	45.0584887866358	17.3698843847044	2.89956603959314	14.089930542739	13.6590944016605	-1.95217894566202	0.538777431186044	-3.62334951812026	0.000290812424408	0.176844891531904
ENSMUSG00000080002	Gm5566	30	49	26	46	98	77	53	61	25.420261128753	51.1642124922125	27.1137093828362	45.2680089677413	105.136473835483	78.6753586836612	51.2256666994787	61.3918402219341	55.6744414265126	-1.0319931958465	0.285833626842198	-3.61046811478287	0.000305644875664	0.18199242065329
ENSMUSG00000086567	Gm2830	180	169	119	209	329	244	186	205	152.521566772518	176.464324718039	124.097362175289	205.674214657781	352.95816216198	249.308928815758	179.773094454774	206.316840090106	205.889311730781	-0.683385410341283	0.19038753137745	-3.58944414792819	0.000331383819378	0.187314672951187
ENSMUSG00000107176	Gm9794	155	195	139	216	358	267	207	219	131.338015831891	203.612682366968	144.954061700547	212.56282471809	384.069975847991	272.809360630358	200.070056731926	220.406770632845	221.227968557577	-0.712578412141103	0.199271256081629	-3.57592171672369	0.000348996083421	0.187314672951187
ENSMUSG00000034437	Gm9761	48	65	38	59	108	102	58	68	40.6724178060048	67.8708941223227	39.6277290979913	58.0611419368856	115.864685451349	104.219306308227	56.0582767654673	68.4368054933036	68.8514071226939	-0.876201614616432	0.244559160121408	-3.58277978294272	0.000339957190627	0.187314672951187
ENSMUSG00000080775	Gm6368	99	176	70	134	250	226	130	167	83.8868617248849	183.773497931212	72.9984483384051	131.867678297333	268.205290396641	230.917286526071	125.647861715703	168.072742902672	158.171208479115	-0.896000273897462	0.25082129040217	-3.57226562570029	0.00035390617331	0.187314672951187
ENSMUSG00000112546	Gm6992	126	190	65	148	286	238	142	190	106.765096740763	198.391844357559	67.7842734570904	145.64489841795	306.826852213758	243.178381385862	137.246125874075	191.220485937172	174.632244798029	-0.914013466796138	0.254130193709054	-3.5966346755418	0.000322360718731	0.187314672951187
ENSMUSG00000105854	Gm8925	18	41	16	47	93	60	30	56	15.2521566772518	42.8108716771574	16.6853596202069	46.252096119214	99.7723680275506	61.3054742989568	28.9956603959314	56.3597221709559	45.9292136234031	-1.276577848769	0.357155346904704	-3.57429297876258	0.000351175537477	0.187314672951187
ENSMUSG00000101939	Gm28438	116	169	97	166	334	235	180	175	98.2916763645116	176.464324718039	101.154992697504	163.358467144458	358.322267969913	240.113107670914	173.973962375588	176.124131784237	185.975366340646	-0.856416312340028	0.24146689968574	-3.54672343685458	0.000390053826112	0.202490227830707
ENSMUSG00000111684	Gm8543	19	24	9	19	45	41	15	29	16.0994987148769	25.0600224451653	9.38551478636636	18.6976558779801	48.2769522713955	41.8920741042872	14.4978301979657	29.1862846956736	25.3869791367138	-1.24795713626984	0.352307574426306	-3.54223759821799	0.00039674793599	0.202490227830707
ENSMUSG00000055093	Gm8430	52	49	43	57	96	79	61	74	44.0617859565052	51.1642124922125	44.841903979306	56.0929676339403	102.99083151231	80.7188744936265	58.9578428050604	74.4753471544774	64.1629707534298	-0.753715381351589	0.21339030201757	-3.53209763623433	0.000412277104817	0.206724419873245
ENSMUSG00000105787	Gm8099	88	102	53	104	174	162	115	118	74.5660993110088	106.505095391953	55.2702537419353	102.345063753154	186.670882116062	165.524780607183	111.150031517737	118.757986003086	115.098774055265	-0.802793968539097	0.227850033417572	-3.52334365063642	0.000426138436828	0.209990735568718
ENSMUSG00000047676	Rpsa-ps10	174	160	119	177	303	218	168	181	147.437514546767	167.066816301102	124.097362175289	174.183425810657	325.06481196073	222.74322328621	162.375698217216	182.162673445411	188.141440717923	-0.648869337424515	0.184637300201136	-3.51429173150638	0.000440928279026	0.211073294089619
ENSMUSG00000115503	Gm6392	37	53	18	43	109	58	37	64	31.3516553921287	55.34088289974	18.7710295727327	42.3157475133234	116.937506612936	59.2619584889916	35.7613144883153	64.411111052521	53.0189007525861	-1.12753428171628	0.320962046916735	-3.5129832095344	0.000443105477253	0.211073294089619
ENSMUSG00000079641	Rpl39	2166	1881	1870	2234	3011	2375	1824	2142	1835.34285349597	1964.07925913983	1950.10140561168	2198.45069638987	3230.26451753715	2426.67502433371	1762.93615207263	2155.75937303906	2190.45116020249	-0.423083686782438	0.120903380342316	-3.49935366227606	0.000466387530427	0.216664767068916
ENSMUSG00000106826	Gm42583	62	40	92	73	112	121	88	124	52.5352063327562	41.7667040752755	95.9408178161895	71.8383620575025	120.155970097695	123.632706502896	85.0539371613986	124.796527664259	89.4650289634967	-0.825821441463632	0.236131605916306	-3.49729312287121	0.000470005092833	0.216664767068916
ENSMUSG00000022206	Npr3	268	368	199	209	144	134	192	144	227.087666083527	384.253677492535	207.524160276323	205.674214657781	154.486247268465	136.91555926767	185.572226533961	144.924999868172	205.804843931054	0.733732483579191	0.212167511694561	3.45826973092602	0.000543656790379	0.246638963901834
ENSMUSG00000039001	Rps21	5723	5602	5300	5564	9050	6381	4858	5776	4849.33848132845	5849.42690574233	5527.02537419353	5475.46091079375	9709.03151235842	6519.83719169406	4695.36394011448	5813.10277249002	6054.82338608938	-0.476862149552401	0.138806136317849	-3.43545438409469	0.000591561043874	0.256809675477838
ENSMUSG00000110545	Gm7730	41	62	24	53	110	80	52	69	34.7410235426291	64.738391316677	25.0280394303103	52.1566190280498	118.010327774522	81.7406323986091	50.259144686281	69.4432291034992	62.0146759100722	-0.984344631491661	0.286581437210022	-3.43478154438273	0.000593031684739	0.256809675477838
ENSMUSG00000083344	Gm7363	43	54	26	70	140	83	25	60	36.4357076178793	56.3850505016219	27.1137093828362	68.8861006030846	150.194962622119	84.8059061135569	24.1630503299428	60.3854166117384	63.5462379728474	-1.20880617371661	0.351791730325312	-3.43614152782611	0.000590062642859	0.256809675477838
ENSMUSG00000046714	Foxc2	77	98	36	32	17	11	17	19	65.2453368971327	102.328424984425	37.5420591454655	31.4907888471244	18.2379597469716	11.2393369548087	16.4308742243611	19.1220485937172	37.7046036742508	1.64329192434477	0.481813773615945	3.41063708497184	0.000648112945976	0.260959692495326
ENSMUSG00000034892	Rps29	5450	4922	4062	5255	7573	5700	4728	5184	4618.0141050568	5139.39293646265	4235.99567358002	5171.37798098871	8124.47465669506	5824.0200584009	4569.71607839878	5217.2999952542	5362.53643560464	-0.428438632989123	0.125761459798315	-3.40675620079646	0.000657398196692	0.260959692495326
ENSMUSG00000084159	Gm12696	57	58	35	66	90	91	50	74	48.2984961446307	60.5617209091495	36.4992241692025	64.9497519971941	96.5539045427909	92.9799693534178	48.3261006598856	74.4753471544774	65.3305643663436	-0.766128649601504	0.224697419274494	-3.40960146349339	0.000650578728911	0.260959692495326
ENSMUSG00000062896	Rpl31-ps11	99	127	54	120	246	184	129	126	83.8868617248849	132.609285439	56.3130887181982	118.090458176716	263.914005750295	188.003454516801	124.681339702505	126.809374884651	136.788483614131	-0.903226771053325	0.264992700339074	-3.40849679971408	0.000653218513958	0.260959692495326
ENSMUSG00000083337	Gm11539	30	35	15	21	65	50	26	37	25.420261128753	36.5458660658661	15.6425246439439	20.6658301809254	69.7333755031268	51.0878952491307	25.1295723431405	37.2376735772387	35.1828748365156	-1.09205070693136	0.319348674703375	-3.41961872221861	0.000627089618458	0.260959692495326
ENSMUSG00000090114	Gm3076	13	13	8	11	28	27	10	22	11.0154464891263	13.5741788244645	8.34267981010344	10.824958666199	30.0389925244238	27.5874634345306	9.66522013197712	22.1413194243041	16.6487824131411	-1.31393116071405	0.385632253152686	-3.40721283028632	0.000656299297095	0.260959692495326
ENSMUSG00000047905	Gm8566	123	147	85	109	275	165	132	141	104.223070627887	153.492637476637	88.640972982349	107.265499510517	295.025819436306	168.590054322131	127.580905742098	141.905729037585	148.340586141939	-0.795575983114349	0.233813738375299	-3.40260580341672	0.000667465060804	0.261326286340381
ENSMUSG00000060019	Gm10073	149	177	87	156	367	201	175	183	126.25396360614	184.817665533094	90.7266429348749	153.517595629731	393.72536630227	205.373338901505	169.1413523096	184.175520665802	188.466430735377	-0.848896599137555	0.250224380692989	-3.39254151328724	0.000692474381162	0.263888137173173
ENSMUSG00000083011	Gm12816	61	86	56	102	196	142	102	95	51.6878642951311	89.7984137618423	58.398758670724	100.376889450209	210.272947670967	145.089622507531	98.5852453461666	95.6102429685859	106.227498083895	-0.914810926232025	0.269544296201288	-3.39391684084782	0.000689006115848	0.263888137173173
ENSMUSG00000070271	Gm13268	73	101	49	105	190	131	98	115	61.8559687466323	105.460927790071	51.0989138368835	103.329150904627	203.836020701448	133.850285552722	94.7191572933758	115.738715172499	108.736142499782	-0.859960943105848	0.254116316493673	-3.38412328248611	0.000714059331791	0.265045841063905
ENSMUSG00000085342	Gm12254	96	168	88	151	319	210	168	170	81.3448356120096	175.420157116157	91.7694779111378	148.597159872368	342.229950546115	214.569160046349	162.375698217216	171.092013733259	173.424806631826	-0.880234271785286	0.259983474498515	-3.38573162576268	0.000709887718893	0.265045841063905
ENSMUSG00000016028	Celsr1	479	342	259	362	190	221	340	291	405.876836022423	357.105319843606	270.094258852099	356.239548833095	203.836020701448	225.808497001158	328.617484487222	292.869270566931	305.055904538498	0.513021810422989	0.152731880521716	3.35897003736587	0.000782335493588	0.270129333027583
ENSMUSG00000069833	Ahnak	2103	1872	1499	1741	868	1207	1530	1520	1781.96030512559	1954.68175072289	1563.20962941813	1713.29573071386	931.208768257139	1233.26179131401	1478.7786801925	1529.76388749737	1523.27006790519	0.463485519472756	0.13785307843047	3.36217025219735	0.000773324274087	0.270129333027583
ENSMUSG00000021277	Traf3	3548	2668	2652	2933	2191	2371	2838	2536	3006.36954949386	2785.83916182088	2765.59835704929	2886.32761526925	2350.55116503617	2422.58799271378	2742.98947345511	2552.29027545614	2689.06919878681	0.216776513220122	0.064513692066072	3.36016287826328	0.000778965337991	0.270129333027583
ENSMUSG00000021520	Uqcrb	2174	1880	2033	2145	2770	2418	2084	2154	1842.12158979697	1963.03509153795	2120.08350674254	2110.86693990881	2971.71461759479	2470.61061424796	2014.23187550403	2167.83645636141	2207.56258646181	-0.335698771283029	0.099597432679376	-3.37055647170858	0.000750165287709	0.270129333027583
ENSMUSG00000036305	Rpl39-ps	59	91	50	74	135	121	57	81	49.9931802198809	95.0192517712518	52.1417488131465	72.8224492089752	144.830856814186	123.632706502896	55.0917547522696	81.5203124258469	84.3815325635567	-0.845977249563367	0.251169769707346	-3.36814916281155	0.000756746419307	0.270129333027583
ENSMUSG00000053173	Rpl18-ps2	57	63	30	51	102	77	40	68	48.2984961446307	65.7825589185589	31.2850492878879	50.1884447251045	109.42775848183	78.6753586836612	38.6608805279085	68.4368054933036	61.3444190328606	-0.866907684114118	0.258145032725907	-3.35821950536845	0.000784462917368	0.270129333027583
ENSMUSG00000001119	Col6a1	922	536	549	478	317	372	391	371	781.249358690342	559.673834608692	572.516401968348	470.393658403921	340.084308222941	380.093940653532	377.910107160305	373.383159382583	481.913096136333	0.600307593711375	0.179145565060077	3.35094867411349	0.000805352277169	0.270797334514986
ENSMUSG00000115801	AC160336.1	53	87	38	76	142	122	75	85	44.9091279941303	90.8425813637242	39.6277290979913	74.7906235119204	152.340604945292	124.654464407879	72.4891509898284	85.5460068666294	85.6500361471744	-0.906693849818504	0.270557694951981	-3.35120333568567	0.000804611985501	0.270797334514986
ENSMUSG00000113749	Mrto4-ps1	10	14	5	11	33	19	13	27	8.473420376251	14.6183464263464	5.21417488131465	10.824958666199	35.4030983323567	19.4134001946697	12.5647861715703	27.1734374752823	16.7107028154987	-1.4030803641737	0.420453531866811	-3.33706404592211	0.0008466843504	0.28138471417189
ENSMUSG00000027750	Postn	182	186	125	159	78	106	112	90	154.216250847768	194.215173950031	130.354372032866	156.469857084149	83.6800506037522	108.306337928157	108.250465478144	90.5781249176076	128.258829105309	0.65746775591636	0.197688959727421	3.32576870667384	0.000881750639941	0.283160843147733
ENSMUSG00000089999	Gm6485	23	42	26	49	74	71	37	53	19.4888668653773	43.8550392790393	27.1137093828362	48.2202704221592	79.3887659574059	72.5448112537656	35.7613144883153	53.3404513403689	47.4641536236585	-0.976956700336381	0.293695976442327	-3.32642180587798	0.000879686975953	0.283160843147733
ENSMUSG00000084314	Rps15a-ps3	27	40	15	32	96	53	40	44	22.8782350158777	41.7667040752755	15.6425246439439	31.4907888471244	102.99083151231	54.1531689640785	38.6608805279085	44.2826388486082	43.9832215543909	-1.15770874809188	0.34797939890983	-3.32694622646863	0.00087803315307	0.283160843147733
ENSMUSG00000069188	Gm13192	26	39	23	34	91	49	35	44	22.0308929782526	40.7225364733936	23.9852044540474	33.4589631500697	97.6267257043775	50.0661373441481	33.8282704619199	44.2826388486082	43.2501711768521	-1.05613006862449	0.317878037189669	-3.32243799528159	0.000892345012189	0.283379031037414
ENSMUSG00000023886	Smoc2	94	63	53	69	39	30	65	43	79.6501515367594	65.7825589185589	55.2702537419353	67.902013451612	41.8400253018761	30.6527371494784	62.8239308578513	43.2762152384125	55.8997357745605	0.784805205435055	0.237474641459431	3.30479583256526	0.000950456098964	0.290565955394606
ENSMUSG00000084349	Rpl3-ps1	470	529	377	488	847	558	487	535	398.250757683797	552.364661395519	393.148786051124	480.234529918647	908.679523863821	570.140910980298	470.696220427286	538.436631454668	538.994002721895	-0.550988225602997	0.166579748822266	-3.30765431871842	0.000940808613095	0.290565955394606
ENSMUSG00000071532	Gm10335	50	82	39	68	154	91	70	86	42.367101881255	85.6217433543148	40.6705640742542	66.9179263001393	165.214458884331	92.9799693534178	67.6565409238398	86.5524304768251	80.9975919060472	-0.923366159750819	0.279545640317423	-3.30309626257215	0.000956235561266	0.290565955394606
ENSMUSG00000101452	Gm28530	23	39	26	36	96	66	56	51	19.4888668653773	40.7225364733936	27.1137093828362	35.4271374530149	102.99083151231	67.4360217288525	54.1252327390719	51.3276041199777	49.8289925343543	-1.06533527228742	0.322799326078288	-3.30030203355828	0.000965808255921	0.290565955394606
ENSMUSG00000111515	Gm5055	11	23	8	16	41	31	17	30	9.3207624138761	24.0158548432834	8.34267981010344	15.7453944235622	43.9856676250492	31.674495054461	16.4308742243611	30.1927083058692	22.4635545875707	-1.26254664673908	0.381989695804835	-3.30518508903479	0.000949136977222	0.290565955394606
ENSMUSG00000061272	Gm14173	23	35	17	50	92	59	41	52	19.4888668653773	36.5458660658661	17.7281945964698	49.2043575736319	98.6995468659641	60.2837163939742	39.6274025411062	52.3340277301733	46.7389973290704	-1.1160554690636	0.33967486768205	-3.28565806672594	0.001017444379907	0.302912268980405
ENSMUSG00000091086	Rpl6l	128	174	104	156	328	201	188	185	108.459780816013	181.685162727448	108.454837531345	153.517595629731	351.885341000394	205.373338901505	181.70613848117	186.188367886194	184.658820371725	-0.755956496966977	0.23074967139535	-3.27608915928541	0.001052553270067	0.310134278471955
ENSMUSG00000048373	Fgfbp1	63	32	7	6	1	4	3	3	53.3825483703813	33.4133632602204	7.29984483384051	5.90452290883582	1.07282116158657	4.08703161993045	2.89956603959314	3.01927083058692	13.8848711281219	2.91507229535084	0.892637666055053	3.26568372163118	0.00109200141993	0.313524011873989
ENSMUSG00000070469	Adamtsl3	257	157	100	81	61	71	86	59	217.766903669651	163.934313495456	104.283497626293	79.7110592692836	65.4420908567805	72.5448112537656	83.1208931350032	59.3789930015428	105.772820288472	0.982501332309605	0.300646253557372	3.26796466173863	0.001083238899716	0.313524011873989
ENSMUSG00000081729	Hspa9-ps1	17	25	15	24	45	38	15	32	14.4048146396267	26.1041900470472	15.6425246439439	23.6180916353433	48.2769522713955	38.8268003893393	14.4978301979657	32.2055555262605	26.6970949188653	-1.08177183361775	0.331384708463507	-3.26439876671884	0.001096966557762	0.313524011873989
ENSMUSG00000033965	Slc16a2	1300	1136	851	958	705	820	940	753	1101.54464891263	1186.17439573782	887.452564799753	942.755491110786	756.338918918529	837.841482085743	908.530692405849	757.836978477317	922.309396556054	0.358811714584293	0.110129669939956	3.25808399117079	0.001121672022973	0.313529257244688
ENSMUSG00000037224	Zfyve28	956	820	739	817	605	655	889	720	810.058987969596	856.217433543148	770.655047458305	803.999202753145	649.056802759872	669.251427763612	859.238069732766	724.624999340861	767.887746415163	0.267693094844434	0.082215050772204	3.25601081955347	0.001129894457724	0.313529257244688
ENSMUSG00000028563	Tm2d1	1029	885	948	976	1227	1109	995	1026	871.914956716228	924.088327665471	988.607557497257	960.469059837294	1316.35156526672	1133.12951662572	961.689403131723	1032.59062406073	1023.60512635014	-0.302172798434472	0.092797257574962	-3.25626862615392	0.001128868942217	0.313529257244688
ENSMUSG00000081740	Gm14279	33	64	29	45	126	71	42	55	27.9622872416283	66.8267265204408	30.242214311625	44.2839218162687	135.175466359907	72.5448112537656	40.5939245543039	55.3532985607602	59.1228313273375	-1.06510037717915	0.327516783604946	-3.25204823232475	0.001145765770861	0.314876264393885
ENSMUSG00000062980	Cped1	262	212	117	134	89	96	107	80	222.003613857776	221.36353159896	122.011692222763	131.867678297333	95.4810833812044	98.0887588783309	103.417855412155	80.5138888156512	134.343512808022	0.811286760040999	0.250448881548877	3.23933073696985	0.001198105550898	0.325835946735342
ENSMUSG00000068262	Gm5879	92	124	67	148	283	161	131	138	77.9554674615092	129.476782633354	69.8699434096163	145.64489841795	303.608388728998	164.503022702201	126.6143837289	138.886458206998	144.569918161191	-0.88030308543873	0.271960457683777	-3.23687896739131	0.0012084465328	0.325835946735342
ENSMUSG00000035202	Lars2	875	898	665	785	1096	983	940	964	741.424282921963	937.662506489935	693.485259214848	772.50841390602	1175.81199309888	1004.38802059791	908.530692405849	970.192360228597	900.500441108	-0.373321487775388	0.115486352068034	-3.23260265035873	0.001226680555344	0.327661279927858
ENSMUSG00000024087	Cyp1b1	214	147	115	125	90	60	76	59	181.331196051771	153.492637476637	119.926022270237	123.01089393408	96.5539045427909	61.3054742989568	73.4556730030261	59.3789930015428	108.55684932238	0.850440809459168	0.264068082849951	3.22053615976909	0.001279510501522	0.335884152076822
ENSMUSG00000020241	Col6a2	824	612	378	412	294	276	379	361	698.209839003082	639.030572351715	394.191621027387	405.443906406727	315.40942150645	282.005181775201	366.311843001933	363.318923280626	432.99016354414	0.645217555304955	0.200365078918793	3.22020962328699	0.001280968915586	0.335884152076822
ENSMUSG00000082465	Rps6-ps3	13	34	15	30	77	56	41	42	11.0154464891263	35.5016984639842	15.6425246439439	29.5226145441791	82.6072294421656	57.2184426790264	39.6274025411062	42.2697916282169	39.1756438039686	-1.21271108848149	0.376969688350917	-3.21699894170958	0.001295390765717	0.336577849772418
ENSMUSG00000016918	Sulf1	2034	1854	1506	1711	1252	1369	1520	1343	1723.49370452945	1935.88673388902	1570.50947425197	1683.77311616968	1343.17209430638	1398.7865719212	1469.11346006052	1351.62690849275	1559.54525795262	0.296980930662983	0.092604670202241	3.20697573906802	0.001341383078014	0.339274953563761
ENSMUSG00000091655	Gm8741	35	47	30	38	90	51	35	54	29.6569713168785	49.0758772884487	31.2850492878879	37.3953117559602	96.5539045427909	52.1096531541133	33.8282704619199	54.3468749505646	48.0314890948205	-0.902042641960931	0.281265186968561	-3.20708955019648	0.001340852495733	0.339274953563761
ENSMUSG00000062458	Gm8623	38	62	33	66	123	79	33	62	32.1989974297538	64.738391316677	34.4135542166767	64.9497519971941	131.957002875148	80.7188744936265	31.8952264355245	62.3982638321297	62.9087578245912	-1.00863837489985	0.31447212917314	-3.20740148754015	0.001339399250537	0.339274953563761
ENSMUSG00000053038	Gm6180	176	231	152	198	336	273	226	226	149.132198622018	241.202716034716	158.510916391965	194.849255991582	360.467910293086	278.939908060253	218.433974982683	227.451735904215	228.623577035065	-0.587268530348347	0.183741581446761	-3.19616564592651	0.001392671332229	0.349157362688149
ENSMUSG00000058838	Rps27a-ps2	167	121	163	163	253	192	175	189	141.506120283392	126.344279827708	169.982101130858	160.40620569004	271.423753881401	196.177517756662	169.1413523096	190.214062326976	178.14942415083	-0.513738721555325	0.16177928023851	-3.17555326490465	0.001495510632143	0.350354011289219
ENSMUSG00000071035	Gm5499	129	157	97	173	264	191	160	179	109.307122853638	163.934313495456	101.154992697504	170.247077204766	283.224786658853	195.155759851679	154.643522111634	180.14982622502	169.727175137319	-0.650493703406544	0.204730168692992	-3.17732216780424	0.001486418164383	0.350354011289219
ENSMUSG00000096948	Gm4221	86	83	55	92	150	121	108	108	72.8714152357586	86.6659109561967	57.3559236944611	90.5360179354826	160.923174237985	123.632706502896	104.384377425353	108.693749901129	100.632909486158	-0.668828371753832	0.210138929124753	-3.18279137777832	0.001458626700416	0.350354011289219
ENSMUSG00000059064	Gm10059	29	33	26	28	62	52	26	36	24.5729190911279	34.4575308621023	27.1137093828362	27.5544402412338	66.5149120183671	53.1314110590959	25.1295723431405	36.2312499670431	36.8382181206183	-0.905380928528071	0.284613934716725	-3.18108433246317	0.001467249111619	0.350354011289219
ENSMUSG00000084304	Gm6142	51	78	32	81	160	113	89	88	43.2144439188801	81.4450729467872	33.3707192404137	79.7110592692836	171.651385853851	115.458643263035	86.0204591745964	88.5652776972164	87.4296326705079	-0.951834839889454	0.299611125121857	-3.17690085607578	0.001488579146803	0.350354011289219
ENSMUSG00000083245	Gm11185	25	36	10	22	63	46	23	35	21.1835509406275	37.590033667748	10.4283497626293	21.649917332398	67.5877331799537	47.0008636292002	22.2300063035474	35.2248263568474	32.8619101466189	-1.14243853227195	0.358641600443331	-3.18546016652762	0.001445239984182	0.350354011289219
ENSMUSG00000115194	Gm48909	17	24	20	42	72	40	18	41	14.4048146396267	25.0600224451653	20.8566995252586	41.3316603618508	77.2431236342327	40.8703161993045	17.3973962375588	41.2633680180213	34.8034251326273	-1.16088196665053	0.363986286764088	-3.18935632705015	0.001425899981267	0.350354011289219
ENSMUSG00000107261	Trmt112-ps1	15	31	16	18	70	38	27	31	12.7101305643765	32.3691956583385	16.6853596202069	17.7135687265075	75.0974813110596	38.8268003893393	26.0960943563382	31.1991319160649	31.3372203177789	-1.2000247649469	0.37781072877844	-3.1762590989062	0.001491876396244	0.350354011289219
ENSMUSG00000038357	Camp	20	6	17	9	1	2	8	3	16.946840752502	6.26500561129133	17.7281945964698	8.85678436325374	1.07282116158657	2.04351580996523	7.73217610558169	3.01927083058692	7.95807615390466	2.48663132085335	0.784500310745341	3.16970087429391	0.001525959409217	0.354163219983816
ENSMUSG00000101795	Gm5835	186	237	115	239	374	325	246	239	157.605618998269	247.467721646007	119.926022270237	235.19682920196	401.235114433376	332.071319119349	237.764415246637	240.535242836758	246.475285469074	-0.701663025343619	0.221506228457481	-3.16768982177089	0.001536553629264	0.354163219983816
ENSMUSG00000032816	Igdcc4	3394	2721	2486	2849	1941	2378	2810	2471	2875.87887569959	2841.18004472062	2592.48775098964	2803.66429454554	2082.34587463952	2429.74029804865	2715.92685708557	2486.87274079343	2603.51209206532	0.245428424643919	0.077629518618348	3.16153480031899	0.001569400643879	0.358164934962952
ENSMUSG00000068706	Gm10250	108	99	110	116	151	175	105	118	91.5129400635108	103.372592586307	114.711847388922	114.154109570826	161.995995399571	178.807633371957	101.48481138576	118.757986003086	123.099739471243	-0.545734001260407	0.172713619031182	-3.15976241087206	0.001578978405421	0.358164934962952
ENSMUSG00000032561	Acpp	50	20	16	19	8	9	12	1	42.367101881255	20.8833520376378	16.6853596202069	18.6976558779801	8.58256929269253	9.19582114484352	11.5982641583725	1.00642361019564	16.127068452898	1.83065675490389	0.583917014550589	3.13513172126497	0.001717769618356	0.361568452261159
ENSMUSG00000033737	Fndc3c1	166	94	123	179	92	77	117	25	140.658778245767	98.1517545768974	128.26870208034	176.151600113602	98.6995468659641	78.6753586836612	113.083075544132	25.160590254891	107.356175795657	0.962590031018521	0.307289580357916	3.13251763986707	0.00173314012665	0.361568452261159
ENSMUSG00000005397	Nid1	601	442	336	315	223	258	299	279	509.252564612685	461.522080031794	350.392552024344	309.987452713881	239.239119033804	263.613539485514	288.990081946116	280.792187244584	337.97369713659	0.556555029345564	0.177502624697779	3.13547492772668	0.001715760939104	0.361568452261159
ENSMUSG00000032308	Ulk3	953	835	832	894	654	706	864	737	807.51696185672	871.879947571376	867.638700250757	879.773913416538	701.625039677614	721.361080917725	835.075019402823	741.734200714187	803.325607975968	0.239437489938072	0.07626108768286	3.13970725062037	0.001691167428887	0.361568452261159
ENSMUSG00000081855	Rpl17-ps5	90	105	58	114	204	145	108	107	76.260783386259	109.637598197598	60.4844286232499	112.185935267881	218.855516963659	148.154896222479	104.384377425353	107.687326290934	117.206357797177	-0.772428983320266	0.245474022329689	-3.14668320496593	0.001651337725376	0.361568452261159
ENSMUSG00000100104	Gm5644	73	101	60	122	199	144	100	107	61.8559687466323	105.460927790071	62.5700985757758	120.058632479662	213.491411155727	147.133138317496	96.6522013197712	107.687326290934	114.363713084509	-0.80602599924407	0.256177749034012	-3.14635444445667	0.001653195255808	0.361568452261159
ENSMUSG00000078134	Srsf3-ps	36	46	29	50	96	73	47	48	30.5043133545036	48.0317096865668	30.242214311625	49.2043575736319	102.99083151231	74.5883270637308	45.4265346202925	48.3083332893907	53.6620776765064	-0.88857313197421	0.283522824776689	-3.13404443777702	0.001724147433084	0.361568452261159
ENSMUSG00000067121	Gm7027	34	61	25	39	89	83	59	63	28.8096292792534	63.6942237147952	26.0708744065732	38.3793989074329	95.4810833812044	84.8059061135569	57.024798778665	63.4046874423254	57.2088252529758	-0.927293372978362	0.295440404088345	-3.13868164322262	0.0016970971575	0.361568452261159
ENSMUSG00000081789	Gm11893	28	32	18	44	68	65	42	45	23.7255770535028	33.4133632602204	18.7710295727327	43.299834664796	72.9518389878865	66.4142638238699	40.5939245543039	45.2890624588038	43.0573617970145	-0.94522679631507	0.301370448348273	-3.13642827787394	0.001710192610118	0.361568452261159
ENSMUSG00000107950	Gm6375	47	87	27	76	150	106	76	94	39.8250757683797	90.8425813637242	28.1565443590991	74.7906235119204	160.923174237985	108.306337928157	73.4556730030261	94.6038193583902	83.8629786913352	-0.982915287780072	0.311891854627875	-3.15146187114379	0.001624553718509	0.361568452261159
ENSMUSG00000084093	Gm16418	18	37	14	37	71	52	28	41	15.2521566772518	38.6342012696298	14.599689667681	36.4112246044876	76.1703024726462	53.1314110590959	27.0626163695359	41.2633680180213	37.8156212672937	-1.11087888614452	0.352284671193581	-3.1533557289925	0.001614049881928	0.361568452261159
ENSMUSG00000066592	Gm7589	38	64	17	54	118	91	57	62	32.1989974297538	66.8267265204408	17.7281945964698	53.1407061795224	126.592897067215	92.9799693534178	55.0917547522696	62.3982638321297	63.3696887164023	-1.06321881305904	0.340380793252979	-3.12361576838101	0.001786435728612	0.369986373619286
ENSMUSG00000049241	Hcar1	72	43	18	22	12	4	12	12	61.0086267090072	44.8992068809212	18.7710295727327	21.649917332398	12.8738539390388	4.08703161993045	11.5982641583725	12.0770833223477	23.3706266918436	1.71309882434773	0.551173088958147	3.10809591155095	0.001882969489953	0.37324159807594
ENSMUSG00000113902	Ndufb1-ps	989	896	956	1088	1277	1117	1056	1117	838.021275211224	935.574171286171	996.950237307361	1070.68682080223	1369.99262334604	1141.30357986558	1020.64724593678	1124.17517258853	1062.16889079299	-0.317810441687641	0.102293124878636	-3.10686023195304	0.00189085775008	0.37324159807594
ENSMUSG00000019890	Nts	655	508	653	545	672	661	466	736	555.009034644441	530.437141755999	680.971239499693	536.327497552587	720.935820586172	675.381975193508	450.399258150134	740.727777103991	611.273718060816	-0.372049681772821	0.11974859586112	-3.10692312588207	0.001890455519455	0.37324159807594
ENSMUSG00000110679	Rpl10-ps5	93	93	56	123	198	148	129	122	78.8028094991343	97.1075869750156	58.398758670724	121.042719631134	212.41858999414	151.220169937427	124.681339702505	122.783680443868	120.806956856744	-0.754802203283289	0.242905794068596	-3.10738657419648	0.001887494013342	0.37324159807594
ENSMUSG00000113275	Tubb2a-ps2	34	62	33	45	78	78	46	64	28.8096292792534	64.738391316677	34.4135542166767	44.2839218162687	83.6800506037522	79.6971165886439	44.4600126070947	64.411111052521	55.5617234351109	-0.81450272634142	0.262211755535089	-3.10627845299797	0.001894582176291	0.37324159807594
ENSMUSG00000112474	Gm46209	38	43	19	41	91	57	49	55	32.1989974297538	44.8992068809212	19.8138645489957	40.3475732103781	97.6267257043775	58.240200584009	47.3595786466879	55.3532985607602	49.4799306957354	-0.929027695301776	0.298533895727325	-3.1119672124278	0.001858451386087	0.37324159807594
ENSMUSG00000104132	Gm36952	13	15	7	13	22	33	14	25	11.0154464891263	15.6625140282283	7.29984483384051	12.7931329691443	23.6020655549045	33.7180108644262	13.531308184768	25.160590254891	17.8478641474161	-1.19050421463401	0.383488776666869	-3.10440431915998	0.001906625846509	0.37324159807594
ENSMUSG00000081100	Gm14630	8	12	2	8	27	21	2	13	6.7787363010008	12.5300112225827	2.08566995252586	7.8726972117811	28.9661713628373	21.4569160046349	1.93304402639542	13.0835069325433	11.8383441267877	-1.76271326313717	0.567313687342796	-3.10712274789883	0.001889179381163	0.37324159807594
ENSMUSG00000020122	Egfr	575	513	501	484	318	411	484	425	487.221671634433	535.657979765408	522.460323107728	476.298181312756	341.157129384528	419.942498947854	467.796654387693	427.730034333147	459.783059109193	0.327661060326267	0.10600725023032	3.09093066384012	0.001995302204954	0.386625164415209
ENSMUSG00000071528	Atp5md	3294	3172	3079	3246	4777	3702	3381	3315	2791.14467193708	3312.09963316935	3210.88889191356	3194.34689368018	5124.86668889903	3782.54776424563	3267.81092662146	3336.29426779855	3502.4999672831	-0.37123910142527	0.120144888800507	-3.08992837840726	0.002002047665703	0.386625164415209
ENSMUSG00000050856	Atp5k	1524	1622	1249	1749	2457	1965	1630	1578	1291.34926534065	1693.63985025242	1302.5008853524	1721.16842792564	2635.92159401819	2007.75428329084	1575.43088151227	1588.13645688872	1726.98770557264	-0.453614089314738	0.147089435928061	-3.08393384237733	0.002042830173099	0.386877459828259
ENSMUSG00000105144	Rpl21-ps11	15	23	12	25	48	43	16	23	12.7101305643765	24.0158548432834	12.5140197151552	24.6021787868159	51.4954157561552	43.9355899142524	15.4643522111634	23.1477430344997	25.9856606032127	-1.14896410643962	0.372442789818016	-3.08494119862283	0.002035923996312	0.386877459828259
ENSMUSG00000111897	Gm19810	23	45	13	26	89	49	26	35	19.4888668653773	46.9875420846849	13.5568546914181	25.5862659382886	95.4810833812044	50.0661373441481	25.1295723431405	35.2248263568474	38.9401436256387	-1.20622475126194	0.391376751363168	-3.08200409723022	0.002056120073224	0.386877459828259
ENSMUSG00000077506	Scarna9	4	3	2	7	21	17	11	13	3.3893681505004	3.13250280564566	2.08566995252586	6.88861006030846	22.5292443933179	17.3698843847044	10.6317421451748	13.0835069325433	9.88881610309011	-1.75130629292942	0.568272991642486	-3.08180455289208	0.00205749882418	0.386877459828259
ENSMUSG00000045996	Polr2k	492	443	503	507	659	580	462	514	416.892282511549	462.566247633676	524.545993060254	498.932185796627	706.989145485547	592.619584889916	446.533170097343	517.301735640559	520.797543139434	-0.366501326091891	0.119054310764821	-3.07843809885955	0.002080887552662	0.388717955180645
ENSMUSG00000114642	Gm5461	18	26	9	17	43	28	14	33	15.2521566772518	27.1483576489291	9.38551478636636	16.7294815750348	46.1313099482223	28.6092213395132	13.531308184768	33.2119791364561	23.7499161620677	-1.13432398872128	0.369289004531608	-3.07164300805546	0.002128841609463	0.395093649610758
ENSMUSG00000106917	Gm7832	35	66	38	74	121	92	63	75	29.6569713168785	68.9150617242046	39.6277290979913	72.8224492089752	129.811360551974	94.0017272584004	60.8908868314558	75.481770764673	71.4009945943192	-0.878294595849861	0.286202805362993	-3.06878402095295	0.002149319149671	0.396320584624087
ENSMUSG00000082491	Gm5909	82	109	61	127	159	149	112	135	69.4820470852582	113.814268605126	63.6129335520387	124.979068237025	170.578564692264	152.241927842409	108.250465478144	135.867187376411	117.353307858585	-0.672313979198861	0.219594996769892	-3.0616088211853	0.002201509519363	0.403341945980156
ENSMUSG00000103933	Gm36964	47	58	16	51	108	69	45	64	39.8250757683797	60.5617209091495	16.6853596202069	50.1884447251045	115.864685451349	70.5012954438003	43.493490593897	64.411111052521	57.691397945551	-0.986192512584234	0.322529056036623	-3.05768579334524	0.002230533204617	0.406056493765355
ENSMUSG00000110057	Gm2225	39	63	32	58	100	74	45	65	33.0463394673789	65.7825589185589	33.3707192404137	57.077054785413	107.282116158657	75.6100849687134	43.493490593897	65.4175346627166	60.1349873494685	-0.832860273469516	0.272803268703315	-3.05297028671342	0.002265883731395	0.409881157765862
ENSMUSG00000102478	BC085271	42	42	18	47	98	70	60	57	35.5883655802542	43.8550392790393	18.7710295727327	46.252096119214	105.136473835483	71.5230533487829	57.9913207918627	57.3661457811515	54.5604405385651	-0.943110635606877	0.309236029017287	-3.04980838941686	0.00228987407021	0.411615665412965
ENSMUSG00000004885	Crabp2	160	105	61	49	38	27	28	29	135.574726020016	109.637598197598	63.6129335520387	48.2202704221592	40.7672041402895	27.5874634345306	27.0626163695359	29.1862846956736	60.2061371039802	1.24396963071622	0.408295886460252	3.04673564434092	0.00231341068695	0.413247442773148
ENSMUSG00000028957	Per3	2702	2017	2080	2369	1579	1844	2272	2044	2289.51818566302	2106.08605299577	2169.09675062689	2331.30246183868	1693.98461414519	1884.12157678794	2195.9380139852	2057.12985923989	2090.89718941032	0.239906914849772	0.079014359882748	3.03624449031516	0.002395450386994	0.413484539947111
ENSMUSG00000082809	Gm14150	110	150	80	130	209	180	122	136	93.207624138761	156.625140282283	83.4267981010344	127.931329691443	224.219622771592	183.91642289687	117.915685610121	136.873610986607	140.514529309839	-0.650225121531087	0.213965662623317	-3.03892275778753	0.002374257208334	0.413484539947111
ENSMUSG00000080746	Rpsa-ps12	26	55	29	33	87	70	48	51	22.0308929782526	57.4292181035038	30.242214311625	32.474875998597	93.3354410580312	71.5230533487829	46.3930566334902	51.3276041199777	50.5945445690325	-0.938662102521731	0.309230322084398	-3.03547885018062	0.002401540660971	0.413484539947111
ENSMUSG00000113625	Gm3379	20	30	21	22	61	42	37	40	16.946840752502	31.3250280564566	21.8995345015215	21.649917332398	65.4420908567805	42.9138320092698	35.7613144883153	40.2569444078256	34.5244378006337	-0.96007693158148	0.315746963493233	-3.04065293600854	0.002360657691051	0.413484539947111
ENSMUSG00000091831	Gm4707	13	11	16	20	42	30	16	22	11.0154464891263	11.4858436207008	16.6853596202069	19.6817430294527	45.0584887866358	30.6527371494784	15.4643522111634	22.1413194243041	21.5231612913835	-1.13444057843239	0.373231959727898	-3.03950545730179	0.00236966909359	0.413484539947111
ENSMUSG00000040046	Tph1	2	4	3	0	1	5	1	42	1.6946840752502	4.17667040752755	3.12850492878879	0	1.07282116158657	5.10878952491307	0.966522013197712	42.2697916282169	7.3022229674351	-3.03719115814568	1.00020577653832	-3.03656630404327	0.002392894746925	0.413484539947111
ENSMUSG00000027555	Car13	93	62	67	53	44	27	40	21	78.8028094991343	64.738391316677	69.8699434096163	52.1566190280498	47.2041311098089	27.5874634345306	38.6608805279085	21.1348958141085	50.0193917674792	0.934394230845301	0.309682887965329	3.01726142178677	0.002550697353959	0.418974029158031
ENSMUSG00000030359	Pzp	182	74	77	88	40	57	70	56	154.216250847768	77.2684025392597	80.2982931722456	86.5996693295921	42.9128464634626	58.240200584009	67.6565409238398	56.3597221709559	77.9439907538916	0.83183877824259	0.275681452587315	3.01739116083308	0.002549605797332	0.418974029158031
ENSMUSG00000079499	6530402F18Rik	417	342	303	335	227	275	305	253	353.341629689667	357.105319843606	315.978997807668	329.669195743333	243.53040368015	280.983423870219	294.789214025302	254.625173379497	303.75291975493	0.34633450656031	0.114595991596347	3.02222182238485	0.002509265955049	0.418974029158031
ENSMUSG00000033209	Ttc28	1305	1102	988	1121	755	886	1033	968	1105.78135910076	1150.67269727384	1030.32095654777	1103.16169680083	809.979976997857	905.277503814596	998.417239633236	974.21805466938	1009.72868560478	0.265110985530748	0.087658257657125	3.0243697811988	0.002491517033771	0.418974029158031
ENSMUSG00000029512	Ulk1	3651	2907	2722	2898	2175	2509	3036	2704	3093.64577936924	3035.39521867065	2838.59680538769	2851.8845649677	2333.38602645078	2563.59058360138	2934.36083206825	2721.36944196901	2796.52865656059	0.216517895327439	0.071709453622175	3.0193772841756	0.002532948835255	0.418974029158031
ENSMUSG00000083240	Gm13453	74	101	57	88	145	102	64	105	62.7033107842574	105.460927790071	59.441593646987	86.5996693295921	155.559068430052	104.219306308227	61.8574088446536	105.674479070542	92.6894705255477	-0.697198914625942	0.23040211763496	-3.02600914341663	0.002478048091368	0.418974029158031
ENSMUSG00000063754	Gm10136	99	156	73	122	256	157	124	140	83.8868617248849	162.890145893574	76.1269532671938	120.058632479662	274.642217366161	160.41599108227	119.848729636516	140.89930542739	142.346104609707	-0.770921358546898	0.254918712474298	-3.02418504732023	0.002493038992306	0.418974029158031
ENSMUSG00000083033	Gm9083	21	33	16	21	58	33	18	36	17.7941827901271	34.4575308621023	16.6853596202069	20.6658301809254	62.2236273720208	33.7180108644262	17.3973962375588	36.2312499670431	29.8966484868013	-1.04480537779758	0.345043005132788	-3.02804393149627	0.002461423014984	0.418974029158031
ENSMUSG00000114547	Gm3226	131	184	113	158	289	224	167	158	111.001806928888	192.126838746267	117.840352317711	155.485769932677	310.045315698518	228.873770716105	161.409176204018	159.014930410911	179.474745119387	-0.65736024529059	0.218116419813513	-3.01380448960526	0.00257994005472	0.421355809736793
ENSMUSG00000115448	Gm21178	45	43	25	59	97	72	44	51	38.1303916931295	44.8992068809212	26.0708744065732	58.0611419368856	104.063652673897	73.5665691587482	42.5269685806993	51.3276041199777	54.8308011813539	-0.86125356390169	0.286144980354393	-3.00985033123775	0.002613764534215	0.424454569047744
ENSMUSG00000067288	Rps28	3753	3292	2823	3263	5407	3740	3484	3320	3180.074667207	3437.39974539517	2943.92313799025	3211.07637525522	5800.74402069856	3821.37456463497	3367.36269398083	3341.32638584953	3637.91019887644	-0.420656369029511	0.139882779145529	-3.00720625940577	0.002636607999866	0.425309348122926
ENSMUSG00000083596	Rpl21-ps15	46	64	26	56	118	100	64	55	38.9777337307546	66.8267265204408	27.1137093828362	55.1088804824677	126.592897067215	102.175790498261	61.8574088446536	55.3532985607602	66.7508056359237	-0.92204467290855	0.306928675004273	-3.00410078300997	0.002663670736293	0.425309348122926
ENSMUSG00000081382	Rpl18-ps1	35	43	28	45	122	67	56	43	29.6569713168785	44.8992068809212	29.199379335362	44.2839218162687	130.884181713561	68.4577796338351	54.1252327390719	43.2762152384125	55.5978610842889	-0.999181736619065	0.332480426579367	-3.00523476494202	0.002653759338247	0.425309348122926
ENSMUSG00000091537	Tma7	2879	2564	2545	2670	3436	2868	2777	2843	2439.49772632266	2677.24573122516	2654.01501458916	2627.51269443194	3686.21351121144	2930.40167149014	2684.03163065005	2861.26232378621	2820.02253796334	-0.271944346034735	0.090688853520797	-2.9986523754253	0.002711765173802	0.430583113513539
ENSMUSG00000086266	Igf2os	17	19	6	7	4	0	5	0	14.4048146396267	19.8391844357559	6.25700985757758	6.88861006030846	4.29128464634626	0	4.83261006598856	0	7.06418921320043	2.9061766880197	0.971018470215101	2.99291597138819	0.002763258179834	0.433937813394692
ENSMUSG00000108183	Gm44227	6	9	2	7	24	20	6	9	5.0840522257506	9.39750841693699	2.08566995252586	6.88861006030846	25.7477078780776	20.4351580996523	5.79913207918627	9.05781249176076	10.5619564005248	-1.65342770020692	0.552419759731612	-2.99306400808367	0.002761918173554	0.433937813394692
ENSMUSG00000063129	Aldoart2	14	22	11	13	36	31	21	29	11.8627885267514	22.9716872414015	11.4711847388922	12.7931329691443	38.6215618171164	31.674495054461	20.2969622771519	29.1862846956736	22.359762165074	-1.06664013736626	0.356625515162503	-2.99092491147254	0.002781338759104	0.434390399311217
ENSMUSG00000037003	Tns2	1582	1347	1023	1116	829	968	1032	890	1340.49510352291	1406.4937597349	1066.82018071698	1098.24126104346	889.368742955263	989.06165202317	997.450717620039	895.71701307412	1085.45605383636	0.354164140162491	0.118485002832425	2.98910521750494	0.002797957621118	0.434611015049828
ENSMUSG00000074412	Gm10689	40	44	23	43	99	52	37	47	33.893681505004	45.9433744828031	23.9852044540474	42.3157475133234	106.20929499707	53.1314110590959	35.7613144883153	47.3019096791951	48.5677422723568	-0.918669541427692	0.308193264741761	-2.98082290084261	0.002874749895158	0.444125550018938
ENSMUSG00000028998	Tomm7	1201	1058	1083	1175	1606	1294	1104	1132	1017.65778718775	1104.72932279104	1129.39027929275	1156.30240298035	1722.95078550802	1322.1547290475	1067.04030257027	1139.27152674147	1207.43714201489	-0.348939524357437	0.117530073886897	-2.96893818592536	0.002988307031536	0.453335117573814
ENSMUSG00000058064	Gm10036	119	158	76	156	280	190	148	147	100.833702477387	164.978481097338	79.2554581959826	153.517595629731	300.389925244238	194.134001946697	143.045257953261	147.944270698759	160.512336655424	-0.738691466822821	0.249024524812132	-2.9663402324735	0.003013668952767	0.453335117573814
ENSMUSG00000082475	Gm7206	57	77	34	64	115	85	61	79	48.2984961446307	80.4009053449054	35.4563891929396	62.9815776942488	123.374433582455	86.8494219235221	58.9578428050604	79.5074652054556	71.9783164866522	-0.755589992871957	0.254333651506648	-2.97086126195222	0.00296965903068	0.453335117573814
ENSMUSG00000114349	Gm7591	59	77	28	71	153	97	75	75	49.9931802198809	80.4009053449054	29.199379335362	69.8701877545573	164.141637722745	99.1105167833135	72.4891509898284	75.481770764673	80.0858411144081	-0.901863422622816	0.303951177891582	-2.96713251410562	0.003005913754041	0.453335117573814
ENSMUSG00000086324	Gm15564	65	145	66	82	332	238	140	143	55.0772324456315	151.404302272874	68.8271084333533	80.6951464207563	356.17662564674	243.178381385862	135.31308184768	143.918576257977	154.323806838859	-1.33498306218879	0.449482812670927	-2.97004251231771	0.002977585399286	0.453335117573814
ENSMUSG00000105814	Mir703	17	36	19	27	65	51	35	36	14.4048146396267	37.590033667748	19.8138645489957	26.5703530897612	69.7333755031268	52.1096531541133	33.8282704619199	36.2312499670431	36.2852018790418	-0.99952192141817	0.338488745046283	-2.95289558676907	0.003148084246971	0.471075371008809
ENSMUSG00000059343	Aldoart1	95	136	50	119	209	174	124	126	80.4974935743845	142.006793855937	52.1417488131465	117.106371025244	224.219622771592	177.785875466975	119.848729636516	126.809374884651	130.052001253556	-0.784820822383432	0.26618046383811	-2.94845388375594	0.003193677850311	0.47540888874863
ENSMUSG00000045104	Ldhb-ps	126	177	66	125	248	165	139	178	106.765096740763	184.817665533094	68.8271084333533	123.01089393408	266.059648073468	168.590054322131	134.346559834482	179.143402614824	153.945053685774	-0.727772049784719	0.247207018583163	-2.94397810367949	0.00324022923043	0.478000192345142
ENSMUSG00000100228	Gm29257	19	21	13	22	51	27	16	28	16.0994987148769	21.9275196395196	13.5568546914181	21.649917332398	54.7138792409149	27.5874634345306	15.4643522111634	28.1798610854779	24.8974182937874	-1.05222642329347	0.357466425272916	-2.94356714057865	0.003244534387004	0.478000192345142
ENSMUSG00000021835	Bmp4	133	104	58	74	56	46	68	41	112.696491004138	108.593430595716	60.4844286232499	72.8224492089752	60.0779850488477	47.0008636292002	65.7234968974444	41.2633680180213	71.0828141281992	0.770205050405271	0.262539390894871	2.9336742489575	0.003349755686865	0.490971114288708
ENSMUSG00000063696	Gm8730	113	191	96	168	282	209	155	173	95.7496502516363	199.436011959441	100.112157721241	165.326641447403	302.535567567412	213.547402141366	149.810912045645	174.111284563846	175.078703462249	-0.696426762587933	0.237576985290651	-2.93137301046196	0.003374673069014	0.492099647885076
ENSMUSG00000083326	Rpl38-ps1	24	45	19	65	129	69	51	53	20.3362089030024	46.9875420846849	19.8138645489957	63.9656648457214	138.393929844667	70.5012954438003	49.2926226730833	53.3404513403689	57.8289474605405	-1.12578371292774	0.384475555424381	-2.92810218242643	0.003410379445626	0.494782004748439
ENSMUSG00000090733	Rps27	3966	3557	3646	4111	5720	4182	3822	3932	3360.55852122115	3714.10415989387	3802.17632345464	4045.58227970401	6136.53704427516	4272.99155863729	3694.04713444165	3957.25763528926	4122.90683211463	-0.363081516588445	0.124109649310076	-2.92548982779995	0.003439144193935	0.496435253569984
ENSMUSG00000044424	Gm9493	99	120	62	99	206	143	95	96	83.8868617248849	125.300112225827	64.6557685283016	97.4246279957911	221.001159286833	146.111380412514	91.8195912537826	96.6166665787815	115.852021000839	-0.738299183763489	0.25256440632861	-2.92321152650027	0.003464410765484	0.497569467780453
ENSMUSG00000096887	Gm20594	47	90	39	87	137	150	88	80	39.8250757683797	93.9750841693699	40.6705640742542	85.6155821781194	146.97649913736	153.263685747392	85.0539371613986	80.5138888156512	90.7367896314906	-0.880563862600552	0.301558874223894	-2.92003962697769	0.003499868794189	0.500148750033546
ENSMUSG00000100615	Gm5511	34	39	20	41	82	60	53	50	28.8096292792534	40.7225364733936	20.8566995252586	40.3475732103781	87.9713352500984	61.3054742989568	51.2256666994787	50.321180509782	47.695011905825	-0.868954307194859	0.298308795851468	-2.91293558647705	0.00358048449554	0.509123519238998
ENSMUSG00000019874	Fabp7	1354	1273	1214	1196	1582	1705	1247	1194	1147.30111894439	1329.22535719564	1266.0016611832	1176.96823316127	1697.20307762995	1742.09722799536	1205.25295045755	1201.66979057359	1345.71492714262	-0.336836188516362	0.115700403389789	-2.91127929244618	0.003599521077741	0.509296593677765
ENSMUSG00000067344	Rps25-ps1	59	59	35	59	120	78	74	71	49.9931802198809	61.6058885110314	36.4992241692025	58.0611419368856	128.738539390388	79.6971165886439	71.5226289766307	71.4560763238905	69.6967245145692	-0.745978468115884	0.256806060839646	-2.90483201867141	0.003674502498841	0.512297345948233
ENSMUSG00000081992	Gm13408	55	83	41	67	154	100	72	67	46.6038120693805	86.6659109561967	42.7562340267801	65.9338391486667	165.214458884331	102.175790498261	69.5895849502352	67.4303818831079	80.79625155212	-0.841321736736302	0.289623022608445	-2.90488556178673	0.00367387399078	0.512297345948233
ENSMUSG00000083496	Gm11263	42	87	32	70	110	100	55	83	35.5883655802542	90.8425813637242	33.3707192404137	68.8861006030846	118.010327774522	102.175790498261	53.1587107258742	83.5331596462382	73.1957194290466	-0.848216000196144	0.291897744393006	-2.90586692254161	0.00366237173092	0.512297345948233
ENSMUSG00000079523	Tmsb10	2566	2670	1933	2788	3716	3077	3003	2806	2174.27966854601	2787.92749702464	2015.80000911624	2743.63497830571	3986.60343645568	3143.9490736315	2902.46560563273	2824.02465020897	2822.33561486518	-0.394180740199915	0.135842257068688	-2.90175346542276	0.003710804477534	0.514847100836833
ENSMUSG00000066362	Rps13-ps1	61	77	38	82	159	95	85	84	51.6878642951311	80.4009053449054	39.6277290979913	80.6951464207563	170.578564692264	97.0670009733483	82.1543711218055	84.5395832564338	85.8438956503295	-0.810308272576538	0.279423996561917	-2.8999237092974	0.003732534947007	0.515360296233882
ENSMUSG00000027408	Cpxm1	364	313	271	294	236	232	293	222	308.432501695536	326.824459389031	282.608278567254	289.321622532955	253.18579413443	237.047833955966	283.19094986693	223.426041463432	275.504685200692	0.326236788582606	0.11325172170824	2.88063425139849	0.003968758912471	0.525143974432157
ENSMUSG00000018900	Slc22a5	765	643	663	660	518	499	657	592	648.216658783202	671.399768010054	691.399589262322	649.497519971941	555.721361701841	509.857194586324	635.004962670897	595.802777235819	619.6124790278	0.250572379100563	0.086962418963469	2.88138694952613	0.003959292386121	0.525143974432157
ENSMUSG00000026385	Dbi	5286	3986	3997	4615	5713	4757	4393	4592	4479.05001088628	4162.0520611012	4168.21140012293	4541.56220404622	6129.02729614405	4860.50235400229	4245.93120397755	4621.49721801838	4650.97921853736	-0.268508222743884	0.093097586502009	-2.88415879329043	0.003924608012064	0.525143974432157
ENSMUSG00000025508	Rplp2	4071	3549	3518	3476	5074	3806	3297	3763	3449.52943517178	3705.75081907882	3668.69344649299	3420.68693851889	5443.49457389024	3888.81058636383	3186.62307751286	3787.1720451662	3818.84511527445	-0.326928525121	0.113337506347005	-2.88455724550746	0.003919644886542	0.525143974432157
ENSMUSG00000082064	Rpl5-ps2	49	69	38	59	123	86	70	66	41.5197598436299	72.0475645298502	39.6277290979913	58.0611419368856	131.957002875148	87.8711798285048	67.6565409238398	66.4239582729123	70.6456096635952	-0.774947994334147	0.268784495767969	-2.88315734923612	0.003937107220394	0.525143974432157
ENSMUSG00000061330	Gm6436	15	31	11	21	54	39	24	29	12.7101305643765	32.3691956583385	11.4711847388922	20.6658301809254	57.9323427256746	39.8485582943219	23.1965283167451	29.1862846956736	28.4225068968685	-1.07941406473443	0.374636356392947	-2.88123148304983	0.003961245973525	0.525143974432157
ENSMUSG00000050550	Gm11868	7	15	16	21	26	36	11	27	5.9313942633757	15.6625140282283	16.6853596202069	20.6658301809254	27.8933502012507	36.7832845793741	10.6317421451748	27.1734374752823	20.1783640617273	-1.15129657546479	0.398933062054411	-2.88593923385513	0.00390247496508	0.525143974432157
ENSMUSG00000048592	Gm5946	15	16	4	17	32	41	24	25	12.7101305643765	16.7066816301102	4.17133990505172	16.7294815750348	34.3302771707701	41.8920741042872	23.1965283167451	25.160590254891	21.8621379401583	-1.19759546012166	0.414650236706837	-2.88820638240314	0.003874455661305	0.525143974432157
ENSMUSG00000092505	Gm19246	4	6	3	5	25	14	7	7	3.3893681505004	6.26500561129133	3.12850492878879	4.92043575736319	26.8205290396641	14.3046106697566	6.76565409238398	7.04496527136948	9.07988419013974	-1.71432433825846	0.594920432137253	-2.88160272475388	0.003956582410425	0.525143974432157
ENSMUSG00000070692	Rps12-ps10	8	15	4	12	28	20	11	21	6.7787363010008	15.6625140282283	4.17133990505172	11.8090458176716	30.0389925244238	20.4351580996523	10.6317421451748	21.1348958141085	15.082803079414	-1.28708875085405	0.447149300575514	-2.87843176584972	0.003996577286643	0.526387905205295
ENSMUSG00000101111	Gm28437	1632	2043	1208	2171	3775	2903	2244	2339	1382.86220540416	2133.2344106447	1259.74465132562	2136.4532058471	4049.89988498929	2966.16319816453	2168.87539761567	2354.0248242476	2306.40722227983	-0.782158212666124	0.272038413694623	-2.87517561230943	0.004038028369724	0.529407746949923
ENSMUSG00000043483	Gm6863	132	172	160	203	301	193	174	213	111.849148966513	179.596827523685	166.853596202069	199.769691748945	322.919169637556	197.199275661644	168.174830296402	214.368228971671	195.091346126061	-0.568533263077686	0.1981421776737	-2.86931974682314	0.004113557221394	0.530109838414065
ENSMUSG00000081228	Gm16089	37	38	20	34	77	60	50	44	31.3516553921287	39.6783688715117	20.8566995252586	33.4589631500697	82.6072294421656	61.3054742989568	48.3261006598856	44.2826388486082	45.2333912735731	-0.849986008776376	0.296291589783066	-2.8687483482022	0.004120995337752	0.530109838414065
ENSMUSG00000113113	Gm2614	39	68	22	48	97	67	51	72	33.0463394673789	71.0033969279684	22.9423694777844	47.2361832706866	104.063652673897	68.4577796338351	49.2926226730833	72.4624999340861	58.56310550734	-0.871113541327136	0.303563891018186	-2.86962174060072	0.004109630974764	0.530109838414065
ENSMUSG00000082193	Rpl5-ps1	36	63	24	55	113	79	69	69	30.5043133545036	65.7825589185589	25.0280394303103	54.124793330995	121.228791259282	80.7188744936265	66.6900189106421	69.4432291034992	64.1900773501772	-0.902701832412663	0.314340982077134	-2.87172810381803	0.004082340414157	0.530109838414065
ENSMUSG00000114571	Gm35595	16	25	13	22	45	30	20	32	13.5574726020016	26.1041900470472	13.5568546914181	21.649917332398	48.2769522713955	30.6527371494784	19.3304402639542	32.2055555262605	25.6667649854942	-0.979109940033367	0.341440096768165	-2.867589217848	0.004136121688056	0.530109838414065
ENSMUSG00000058625	Gm17383	41	52	43	38	74	67	45	57	34.7410235426291	54.2967152978582	44.841903979306	37.3953117559602	79.3887659574059	68.4577796338351	43.493490593897	57.3661457811515	52.4976420677554	-0.675270348331608	0.236070772629982	-2.86045722987499	0.004230306100194	0.534983976325874
ENSMUSG00000085738	Gm12335	21	37	13	30	69	36	23	39	17.7941827901271	38.6342012696298	13.5568546914181	29.5226145441791	74.024660149473	36.7832845793741	22.2300063035474	39.25052079763	33.9745406406723	-1.04074498638071	0.363618788909826	-2.86218704347208	0.004207285343064	0.534983976325874
ENSMUSG00000088609	Gm24187	13	28	12	8	49	37	19	21	11.0154464891263	29.2366928526929	12.5140197151552	7.8726972117811	52.5682369177417	37.8050424843567	18.3639182507565	21.1348958141085	23.8138687169649	-1.23939430750524	0.433170313232479	-2.86121710016649	0.00422017953764	0.534983976325874
ENSMUSG00000003617	Cp	1028	651	487	521	347	412	455	457	871.067614678603	679.753108825109	507.860633440047	512.709405917244	372.268943070538	420.964256852837	439.767516004959	459.935589859408	533.040883581093	0.528430208953169	0.18482924097942	2.85901844401345	0.004249540761036	0.535049006568976
ENSMUSG00000059461	Gm7331	102	145	64	133	246	183	144	128	86.4288878377602	151.404302272874	66.7414384808275	130.883591145861	263.914005750295	186.981696611818	139.17916990047	128.822222105042	144.294414263119	-0.749684162254457	0.262618904102105	-2.85464660214629	0.004308474161303	0.540089912299189
ENSMUSG00000106037	Gm4332	53	94	50	77	145	103	68	81	44.9091279941303	98.1517545768974	52.1417488131465	75.7747106633931	155.559068430052	105.241064213209	65.7234968974444	81.5203124258469	84.877660501765	-0.763176850131483	0.267523208798034	-2.85275006067845	0.004334269656218	0.540950921591113
ENSMUSG00000068243	Gm7079	42	70	34	53	128	81	76	70	35.5883655802542	73.0917321317321	35.4563891929396	52.1566190280498	137.32110868308	82.7623903035917	73.4556730030261	70.4496527136948	70.0352413295461	-0.845119198739885	0.296702308815203	-2.84837419066481	0.004394322370968	0.543883111159459
ENSMUSG00000104699	Rps4x-ps	29	44	25	39	88	59	50	46	24.5729190911279	45.9433744828031	26.0708744065732	38.3793989074329	94.4082622196178	60.2837163939742	48.3261006598856	46.2954860689995	48.0350165288018	-0.871039214937141	0.305813902677586	-2.84826558672011	0.004395822353236	0.543883111159459
ENSMUSG00000081895	Rpl17-ps10	151	173	122	165	292	195	155	158	127.94864768139	180.640995125567	127.225867104077	162.374379992985	313.263779183277	199.24279147161	149.810912045645	159.014930410911	177.440287876933	-0.581098806381214	0.204302545602437	-2.84430526632793	0.004450838302597	0.544258811446677
ENSMUSG00000095588	Gm12350	93	119	60	107	215	139	87	92	78.8028094991343	124.255944623945	62.5700985757758	105.297325207572	230.656549741112	142.024348792583	84.0874151482009	92.5909721379989	115.03568296579	-0.768727031826925	0.270303826733246	-2.84393691764325	0.004455986910133	0.544258811446677
ENSMUSG00000081164	Gm8722	7	4	3	17	27	20	6	14	5.9313942633757	4.17667040752755	3.12850492878879	16.7294815750348	28.9661713628373	20.4351580996523	5.79913207918627	14.089930542739	12.4070554073927	-1.55918291367649	0.54772756677024	-2.8466394760272	0.004418336927304	0.544258811446677
ENSMUSG00000028367	Txn1	2236	1993	2048	2123	2659	2274	2111	2178	1894.65679612972	2081.0260305506	2135.72603138648	2089.21702257641	2852.63146865868	2323.47747593046	2040.32796986037	2191.99062300611	2201.13167726235	-0.261980268774993	0.092163266984159	-2.84256708065723	0.004475181246591	0.544277256207678
ENSMUSG00000044447	Dock5	738	678	529	651	395	521	541	486	625.338423767324	707.94563407592	551.65970244309	640.640735608687	423.764358826694	532.335868495942	522.888409139962	489.121874555081	561.711875864087	0.339231831575952	0.119498319894023	2.83880000887712	0.004528352855627	0.548410393926536
ENSMUSG00000032179	Bmp5	51	31	28	34	18	12	27	19	43.2144439188801	32.3691956583385	29.199379335362	33.4589631500697	19.3107809085582	12.2610948597914	26.0960943563382	19.1220485937172	26.8790000976319	0.966045831528287	0.3414537626379	2.82921419305824	0.004666245743713	0.548832809243805
ENSMUSG00000031231	Cox7b	2991	2741	2815	2937	3622	3224	2984	2954	2534.40003453667	2862.06339675825	2935.58045818015	2890.26396387514	3885.75824726654	3294.14748566395	2884.10168738197	2972.97534451792	3032.41132727257	-0.262552128359628	0.092830780157708	-2.82828742701059	0.004679776894367	0.548832809243805
ENSMUSG00000045690	Wdr89	218	199	176	233	368	246	229	222	184.720564202272	207.789352774496	183.538955822276	229.292306293124	394.798187463856	251.352444625723	221.333541022276	223.426041463432	237.031424208432	-0.496391361518328	0.17553364124951	-2.82789873203131	0.004685462560984	0.548832809243805
ENSMUSG00000086006	Gm13293	82	72	63	61	92	96	57	86	69.4820470852582	75.1800673354959	65.6986035045646	60.0293162398309	98.6995468659641	98.0887588783309	55.0917547522696	86.5524304768251	76.1028156423174	-0.536653085703696	0.189424479813011	-2.83307145007578	0.004610307977731	0.548832809243805
ENSMUSG00000082120	Gm15720	68	135	69	104	207	152	138	133	57.6192585585068	140.962626254055	71.9556133621421	102.345063753154	222.073980448419	155.307201557357	133.380037821284	133.85434015602	127.187265238867	-0.752857635307785	0.266038655313268	-2.82988062175127	0.004656537526538	0.548832809243805
ENSMUSG00000106930	Gm6450	25	40	13	45	93	61	50	47	21.1835509406275	41.7667040752755	13.5568546914181	44.2839218162687	99.7723680275506	62.3272322039394	48.3261006598856	47.3019096791951	47.3148302617701	-1.0452143132058	0.368547349987282	-2.83603806469337	0.004567700165894	0.548832809243805
ENSMUSG00000098123	Gm4518	8	18	7	12	33	18	10	23	6.7787363010008	18.795016833874	7.29984483384051	11.8090458176716	35.4030983323567	18.391642289687	9.66522013197712	23.1477430344997	16.4112934468634	-1.24642617777734	0.440717687692616	-2.8281737098028	0.004681439655095	0.548832809243805
ENSMUSG00000055771	Gm7936	4	5	4	5	27	6	6	12	3.3893681505004	5.22083800940944	4.17133990505172	4.92043575736319	28.9661713628373	6.13054742989568	5.79913207918627	12.0770833223477	8.83436450207396	-1.74250778762197	0.615469062560762	-2.83118664059567	0.004637565083387	0.548832809243805
ENSMUSG00000063902	Gm7964	767	684	563	731	831	762	749	789	649.911342858452	714.210639687211	587.116091636029	719.367707726498	891.514385278436	778.579523596751	723.924987885086	794.06822844436	732.336613389103	-0.274516603036279	0.097313289917975	-2.82095696556625	0.004788062555081	0.556291121490984
ENSMUSG00000082035	Rpl17-ps8	14	21	18	27	66	31	33	35	11.8627885267514	21.9275196395196	18.7710295727327	26.5703530897612	70.8061966647134	31.674495054461	31.8952264355245	35.2248263568474	31.0915544175389	-1.04947032302659	0.371912952850479	-2.82181708107518	0.004775240545573	0.556291121490984
ENSMUSG00000034908	Sidt2	3714	2840	2612	2889	2266	2569	3066	2594	3147.02832773962	2965.43598934456	2723.88495799877	2843.02778060445	2431.01275215516	2624.89605790033	2963.35649246418	2610.66284484749	2788.66315038182	0.196759255947339	0.069866213466912	2.81622899229427	0.004859101896705	0.558756659812478
ENSMUSG00000039221	Rpl22l1	2467	2441	2935	2844	3508	3035	2472	2910	2090.39280682112	2548.81311619369	3060.7206553317	2798.74385878818	3763.45663484567	3101.03524162223	2389.24241662474	2928.69270566931	2835.13717948708	-0.341009459746194	0.121099304768768	-2.81594894700125	0.004863339430629	0.558756659812478
ENSMUSG00000078377	Gm4294	40	47	35	52	77	64	37	53	33.893681505004	49.0758772884487	36.4992241692025	51.1725318765771	82.6072294421656	65.3925059188873	35.7613144883153	53.3404513403689	50.9678520036212	-0.702837203822327	0.249618491468495	-2.81564558654115	0.004867933532532	0.558756659812478
ENSMUSG00000053110	Yap1	960	871	808	788	615	671	819	740	813.448356120096	909.469981239124	842.610660820447	775.460675360438	659.785014375738	685.599554243334	791.581528808926	744.753471544774	777.83865531411	0.245579173263318	0.08727423354485	2.81387946119418	0.00489475785071	0.559588296524538
ENSMUSG00000113368	Gm10054	30	44	22	56	99	60	40	47	25.420261128753	45.9433744828031	22.9423694777844	55.1088804824677	106.20929499707	61.3054742989568	38.6608805279085	47.3019096791951	50.3615556343673	-0.929231667061969	0.330532209986758	-2.81131955974637	0.004933875610206	0.56181314269039
ENSMUSG00000063875	Rps6-ps1	37	45	34	70	90	85	44	52	31.3516553921287	46.9875420846849	35.4563891929396	68.8861006030846	96.5539045427909	86.8494219235221	42.5269685806993	52.3340277301733	57.6182512562529	-0.804210997657124	0.286234237129796	-2.80962545124344	0.004959918467664	0.562383669553741
ENSMUSG00000084111	Gm15710	193	239	122	213	504	306	217	242	163.537013261644	249.556056849771	127.225867104077	209.610563263672	540.701865439629	312.65791892468	209.735276863903	243.554513667345	257.07238442184	-0.929671640464235	0.331027955657405	-2.80843845535025	0.004978239683604	0.562383669553741
ENSMUSG00000048387	Osr1	104	126	22	28	17	11	19	7	88.1235719130104	131.565117837118	22.9423694777844	27.5544402412338	18.2379597469716	11.2393369548087	18.3639182507565	7.04496527136948	40.6339599616316	2.24726503723115	0.80143858048427	2.80403900180753	0.005046679988794	0.566649231338594
ENSMUSG00000103034	Gm8797	167	211	113	192	326	272	212	179	141.506120283392	220.319363997078	117.840352317711	188.944733082746	349.739698677221	277.918150155271	204.902666797915	180.14982622502	210.165113942044	-0.624043065030164	0.222596952086527	-2.80346635109176	0.005055650746697	0.566649231338594
ENSMUSG00000051590	Map3k19	537	397	342	481	207	307	409	386	455.022674204679	414.534537947109	356.649561881922	473.345919858339	222.073980448419	313.679676829662	395.307503397864	388.479513535517	377.386671012939	0.442957323912318	0.158378274429234	2.79683135523893	0.005160646270332	0.5674629415693
ENSMUSG00000027878	Notch2	1517	1344	848	1005	693	848	1011	900	1285.41787107728	1403.36125692926	884.324059870964	989.00758723	743.46506497949	866.450703425256	977.153755342887	905.781249176076	1006.8701935039	0.401780027322429	0.143724133262623	2.79549452274844	0.005182037988509	0.5674629415693
ENSMUSG00000029632	Ndufa4	4480	4318	4221	4349	5751	4800	4646	4561	3796.09232856045	4508.71570492599	4401.80643480583	4279.7950217545	6169.79450028434	4904.43794391655	4490.46127331657	4590.29808610232	4642.67516170832	-0.281714825824809	0.100611848149732	-2.80001640965344	0.005110000887189	0.5674629415693
ENSMUSG00000100862	Gm10925	1762	2175	1294	2246	3733	3046	2442	2443	1493.01667029543	2271.06453409311	1349.42845928423	2210.25974220754	4004.84139620265	3112.27457857704	2360.24675622881	2458.69287970795	2407.47812707459	-0.720762934729197	0.257744968050673	-2.79641903459971	0.005167235614027	0.5674629415693
ENSMUSG00000059835	Rpl13-ps3	15	26	13	27	56	36	25	29	12.7101305643765	27.1483576489291	13.5568546914181	26.5703530897612	60.0779850488477	36.7832845793741	24.1630503299428	29.1862846956736	28.7745375810404	-1.01484923472229	0.362791415885624	-2.79733530145662	0.005152602960267	0.5674629415693
ENSMUSG00000044609	Gm9294	22	33	16	46	80	46	27	38	18.6415248277522	34.4575308621023	16.6853596202069	45.2680089677413	85.8256929269253	47.0008636292002	26.0960943563382	38.2440971874343	39.0273965472126	-1.01511767124348	0.362899791297745	-2.79723961155606	0.005154129361536	0.5674629415693
ENSMUSG00000057322	Rpl38	3714	3175	3022	3409	4890	3611	3320	3310	3147.02832773962	3315.23213597499	3151.44729826657	3354.75309937022	5246.09548015831	3689.56779489222	3208.8530838164	3331.26214974757	3555.52992124574	-0.337638639768855	0.120902789076176	-2.79264558203138	0.005227893699379	0.570299350465463
ENSMUSG00000033960	Jcad	1609	1519	1470	1494	916	1266	1669	1383	1363.37333853879	1586.09058725859	1532.96741510651	1470.22620430012	982.704184013294	1293.54550770799	1613.12524002698	1391.88385290057	1404.2395412316	0.306756612974596	0.10992644306579	2.79056252908141	0.005261653580047	0.571799699510718
ENSMUSG00000037410	Tbc1d2b	1130	940	876	946	713	820	953	831	957.496502516363	981.517545768974	913.523439206326	930.946445293115	764.921488211222	837.841482085743	921.095478577419	836.338020072577	892.960050216467	0.210436356763888	0.075483980313233	2.78782803835527	0.005306270184442	0.572296257137921
ENSMUSG00000110960	Supt4b	9	19	9	14	42	24	15	19	7.6260783386259	19.8391844357559	9.38551478636636	13.7772201206169	45.0584887866358	24.5221897195827	14.4978301979657	19.1220485937172	19.2285693724083	-1.18773556929393	0.425935273793036	-2.78853535354542	0.005294696816589	0.572296257137921
ENSMUSG00000080968	Atf1-ps	3	5	2	0	13	9	0	7	2.5420261128753	5.22083800940944	2.08566995252586	0	13.9466751006254	9.19582114484352	0	7.04496527136948	5.00449944895612	-2.36271121032808	0.848114782773377	-2.78583896698734	0.005338938721215	0.573654915755859
ENSMUSG00000035569	Ankrd11	10402	8513	8301	8989	6502	7751	9183	8265	8814.05187537629	8888.99879482051	8656.57313795858	8845.95940458754	6975.48319263585	7919.64552152024	8875.57164719459	8318.09113826697	8411.79683904507	0.188162546135051	0.067855260597521	2.7729986515139	0.005554235089181	0.579363478408286
ENSMUSG00000017778	Cox7c	3845	3335	3649	3540	4625	3955	3320	3572	3258.03013466851	3482.2989522761	3805.30482838343	3483.66851621314	4961.79787233787	4041.05251420624	3208.8530838164	3594.94513561883	3729.49387969006	-0.284528754594845	0.102512070746366	-2.77556342900167	0.005510614911154	0.579363478408286
ENSMUSG00000114003	Gm9616	172	208	109	198	346	233	192	185	145.742830471517	217.186861191433	113.669012412659	194.849255991582	371.196121908952	238.069591860949	185.572226533961	186.188367886194	206.559283532156	-0.628975926523364	0.226467000220182	-2.77734030084668	0.005480576505313	0.579363478408286
ENSMUSG00000028451	1700022I11Rik	39	42	34	60	69	60	40	66	33.0463394673789	43.8550392790393	35.4563891929396	59.0452290883582	74.024660149473	61.3054742989568	38.6608805279085	66.4239582729123	51.4772462846208	-0.680992465568656	0.245320486879509	-2.77592986313911	0.005504408127934	0.579363478408286
ENSMUSG00000075581	Gm16409	34	57	19	50	100	62	47	57	28.8096292792534	59.5175533072676	19.8138645489957	49.2043575736319	107.282116158657	63.348990108922	45.4265346202925	57.3661457811515	53.8461489222714	-0.906976541242802	0.326907751095578	-2.77441124660769	0.00553017213672	0.579363478408286
ENSMUSG00000084260	Gm12844	30	61	23	53	91	78	36	49	25.420261128753	63.6942237147952	23.9852044540474	52.1566190280498	97.6267257043775	79.6971165886439	34.7947924751176	49.3147568995864	53.3362124991713	-0.920113413892782	0.331716363660588	-2.77379567211897	0.005540646594605	0.579363478408286
ENSMUSG00000083411	Rpl30-ps10	21	29	17	31	68	41	24	27	17.7941827901271	30.2808604545747	17.7281945964698	30.5067016956518	72.9518389878865	41.8920741042872	23.1965283167451	27.1734374752823	32.6904773026281	-0.986328191949964	0.355254349636935	-2.77640004396281	0.005496453291212	0.579363478408286
ENSMUSG00000076258	Gm23935	28	24	12	8	45	36	13	23	23.7255770535028	25.0600224451653	12.5140197151552	7.8726972117811	48.2769522713955	36.7832845793741	12.5647861715703	23.1477430344997	23.7431353103055	-1.13510752666833	0.408757436402538	-2.77697095044527	0.005486808259049	0.579363478408286
ENSMUSG00000050919	Zfp366	305	254	240	267	143	224	277	217	258.439321475656	265.218570877999	250.280394303103	262.751269443194	153.413426106879	228.873770716105	267.726597655766	218.393923412454	238.137159248895	0.379986932391745	0.137253471675544	2.76850507133258	0.005631410921646	0.582764129959491
ENSMUSG00000041734	Kirrel	765	670	514	577	405	489	637	542	648.216658783202	699.592293260865	536.017177799146	567.818286399712	434.492570442559	499.639615536498	615.674522406942	545.481596726037	568.36659016937	0.314446626942299	0.113619292569206	2.76754607278309	0.005648006157894	0.582764129959491
ENSMUSG00000089782	Gm3531	84	89	62	104	174	106	108	110	71.1767311605084	92.930916567488	64.6557685283016	102.345063753154	186.670882116062	108.306337928157	104.384377425353	110.70659712152	105.147084325068	-0.633710408357363	0.228795155443216	-2.76977196973316	0.005609554997593	0.582764129959491
ENSMUSG00000049791	Fzd4	527	605	402	484	342	412	475	323	446.549253828428	631.721399138542	419.219660457698	476.298181312756	366.904837262606	420.964256852837	459.097956268913	325.074826093192	443.228796401871	0.390669621425107	0.141417769756732	2.76252144335992	0.005735679403002	0.585469475061414
ENSMUSG00000083833	Gm13841	71	124	49	104	208	120	102	114	60.1612846713821	129.476782633354	51.0989138368835	102.345063753154	223.146801610006	122.610948597914	98.5852453461666	114.732291562303	112.769666501395	-0.797938678754671	0.288730925850731	-2.7636065530687	0.005716642411288	0.585469475061414
ENSMUSG00000080932	Gm10224	30	49	22	46	89	58	54	58	25.420261128753	51.1642124922125	22.9423694777844	45.2680089677413	95.4810833812044	59.2619584889916	52.1921887126764	58.3725693913471	51.2628315050889	-0.851857449650041	0.308280716589953	-2.76325246377023	0.005722848224669	0.585469475061414
ENSMUSG00000021390	Ogn	416	289	97	127	76	48	75	49	352.494287652042	301.764436943866	101.154992697504	124.979068237025	81.534408280579	49.0443794391654	72.4891509898284	49.3147568995864	141.596935142449	1.66915294023176	0.605069641017145	2.75861293821625	0.005804724337538	0.590408634488212
ENSMUSG00000030109	Slc6a12	175	135	33	40	22	17	32	23	148.284856584393	140.962626254055	34.4135542166767	39.3634860589055	23.6020655549045	17.3698843847044	30.9287044223268	23.1477430344997	57.2591150638081	1.88330382349082	0.685094107574019	2.74897098467212	0.005978267801733	0.591739989707783
ENSMUSG00000031170	Slc38a5	169	125	83	88	69	71	80	51	143.200804358642	130.520950235236	86.5553030298231	86.5996693295921	74.024660149473	72.5448112537656	77.3217610558169	51.3276041199777	90.2619454415408	0.671964110154293	0.244712795456663	2.74592960658362	0.006033970891559	0.591739989707783
ENSMUSG00000040711	Sh3pxd2b	1477	1207	1116	1212	871	1107	1159	979	1251.52418957227	1260.31029547144	1163.80383350943	1192.71362758484	934.427231741899	1131.08600081575	1120.19901329615	985.288714381532	1129.91911329666	0.235931074735194	0.0859799977504	2.74402280656138	0.006069132126126	0.591739989707783
ENSMUSG00000092203	1110038B12Rik	400	292	329	340	423	410	353	354	338.93681505004	304.896939749511	343.092707190504	334.589631500697	453.803351351117	418.920741042871	341.182270658792	356.273958009257	361.462051819099	-0.299599528880061	0.109207255659111	-2.74340314727125	0.006080598263288	0.591739989707783
ENSMUSG00000058351	Smim4	159	171	130	136	200	192	159	174	134.727383982391	178.552659921803	135.568546914181	133.835852600279	214.564232317313	196.177517756662	153.677000098436	175.117708174041	165.277612720638	-0.408089570245465	0.148603925363367	-2.74615606046477	0.006029807315442	0.591739989707783
ENSMUSG00000080848	Gm9385	158	211	120	188	352	200	176	191	133.880041944766	220.319363997078	125.140197151552	185.008384476856	377.633048878471	204.351580996523	170.107874322797	192.226909547367	201.083425164426	-0.628885264085215	0.229194155741213	-2.74389747003541	0.006071449772922	0.591739989707783
ENSMUSG00000067017	Capza1-ps1	65	70	32	91	131	94	79	91	55.0772324456315	73.0917321317321	33.3707192404137	89.55193078401	140.53957216784	96.0452430683657	76.3552390426192	91.5845485278033	81.952027176052	-0.738831807629895	0.269291405951542	-2.74361450570333	0.006076685109119	0.591739989707783
ENSMUSG00000091742	Gm5093	42	40	34	53	91	66	47	46	35.5883655802542	41.7667040752755	35.4563891929396	52.1566190280498	97.6267257043775	67.4360217288525	45.4265346202925	46.2954860689995	52.7191057498801	-0.741904303946135	0.269647402875641	-2.75138679636493	0.005934352672384	0.591739989707783
ENSMUSG00000059159	Gm8129	37	49	31	49	74	59	27	52	31.3516553921287	51.1642124922125	32.3278842641508	48.2202704221592	79.3887659574059	60.2837163939742	26.0960943563382	52.3340277301733	47.6458283760679	-0.761089142312691	0.276785996618695	-2.74973861253963	0.005964282065464	0.591739989707783
ENSMUSG00000082895	Rpsa-ps9	55	87	37	90	158	94	69	84	46.6038120693805	90.8425813637242	38.5848941217284	88.5678436325374	169.505743530677	96.0452430683657	66.6900189106421	84.5395832564338	85.1724649941862	-0.817200667939413	0.296809203239441	-2.75328614820668	0.005900030225151	0.591739989707783
ENSMUSG00000080836	Gm6444	31	63	27	45	93	70	44	52	26.2676031663781	65.7825589185589	28.1565443590991	44.2839218162687	99.7723680275506	71.5230533487829	42.5269685806993	52.3340277301733	53.8308807434389	-0.851706499922538	0.310508427548904	-2.74294165425961	0.006089150374742	0.591739989707783
ENSMUSG00000098915	Rpl15-ps2	19	26	13	36	56	37	29	40	16.0994987148769	27.1483576489291	13.5568546914181	35.4271374530149	60.0779850488477	37.8050424843567	28.0291383827336	40.2569444078256	32.3001198540003	-0.937857261108201	0.340776703693722	-2.7521167114496	0.005921141430293	0.591739989707783
ENSMUSG00000106189	Gm42933	18	18	9	25	35	32	16	28	15.2521566772518	18.795016833874	9.38551478636636	24.6021787868159	37.5487406555298	32.6962529594436	15.4643522111634	28.1798610854779	22.7405092494904	-0.972374323545335	0.354198170747415	-2.74528330141702	0.006045868092381	0.591739989707783
ENSMUSG00000113651	Gm4900	11	5	3	3	19	17	9	12	9.3207624138761	5.22083800940944	3.12850492878879	2.95226145441791	20.3836020701448	17.3698843847044	8.69869811877941	12.0770833223477	9.89395433780856	-1.48126159558212	0.540223075587701	-2.74194432359387	0.006107669324509	0.591739989707783
ENSMUSG00000028600	Podn	116	95	40	46	35	26	27	23	98.2916763645116	99.1959221787793	41.7133990505172	45.2680089677413	37.5487406555298	26.565705529548	26.0960943563382	23.1477430344997	49.7284112671831	1.09833106284066	0.40189555712931	2.73287684662627	0.006278380290254	0.594180089654777
ENSMUSG00000035305	Ror1	46	75	28	48	19	27	48	28	38.9777337307546	78.3125701411416	29.199379335362	47.2361832706866	20.3836020701448	27.5874634345306	46.3930566334902	28.1798610854779	39.5337312126985	0.914970214189944	0.334757747422046	2.73323088482966	0.006271635153319	0.594180089654777
ENSMUSG00000032578	Cish	280	228	187	199	165	157	195	145	237.255770535028	238.07021322907	195.010140561168	195.833343143055	177.015491661783	160.41599108227	188.471792573554	145.931423478368	192.250520783037	0.390613999621828	0.142851817932204	2.7343999206731	0.00624940898583	0.594180089654777
ENSMUSG00000062353	Gm15772	95	103	78	86	149	123	98	100	80.4974935743845	107.549262993834	81.3411281485085	84.6314950266468	159.850353076398	125.676222312861	94.7191572933758	100.642361019564	104.363434180697	-0.520334892006674	0.190304789739194	-2.73421858020376	0.006252852048644	0.594180089654777
ENSMUSG00000099997	Tubb4b-ps2	54	59	27	73	110	94	81	77	45.7564700317554	61.6058885110314	28.1565443590991	71.8383620575025	118.010327774522	96.0452430683657	78.2882830690147	77.4946179850643	72.1494671070444	-0.765250596521761	0.27973488680944	-2.73562802712935	0.006226136143126	0.594180089654777
ENSMUSG00000093826	Gm6900	30	53	23	53	73	53	39	72	25.420261128753	55.34088289974	23.9852044540474	52.1566190280498	78.3159447958193	54.1531689640785	37.6943585147108	72.4624999340861	49.9411174649106	-0.815547484193383	0.298011063977793	-2.7366349198839	0.006207113584171	0.594180089654777
ENSMUSG00000083121	Gm6341	20	21	16	32	53	49	28	25	16.946840752502	21.9275196395196	16.6853596202069	31.4907888471244	56.859521564088	50.0661373441481	27.0626163695359	25.160590254891	30.774921799002	-0.947328793001241	0.345837661618092	-2.73922969687256	0.006158333132104	0.594180089654777
ENSMUSG00000110588	Gm45774	145	131	93	187	248	214	176	154	122.86459545564	136.785955846527	96.9836527924524	184.024297325383	266.059648073468	218.656191666279	170.107874322797	154.989235970129	168.808931431584	-0.583811410497379	0.213987529573244	-2.7282496866134	0.00636713931416	0.600591447980194
ENSMUSG00000042962	Gm5436	35	40	17	43	72	48	37	50	29.6569713168785	41.7667040752755	17.7281945964698	42.3157475133234	77.2431236342327	49.0443794391654	35.7613144883153	50.321180509782	42.9797019466803	-0.814005610369147	0.298720364964672	-2.72497528069576	0.006430630141001	0.604585000197167
ENSMUSG00000048108	Tmem72	9	596	5	18	3	3	5	10	7.6260783386259	622.323890721605	5.21417488131465	17.7135687265075	3.2184634847597	3.06527371494784	4.83261006598856	10.0642361019564	84.2572870044632	4.59188938697598	1.70073744257086	2.6999401977267	0.006935194097895	0.608020805251304
ENSMUSG00000022215	Fitm1	6	1	8	7	0	1	5	0	5.0840522257506	1.04416760188189	8.34267981010344	6.88861006030846	0	1.02175790498261	4.83261006598856	0	3.40173470862694	3.82341509342139	1.40916854221132	2.71324187199181	0.006662845472485	0.608020805251304
ENSMUSG00000041559	Fmod	714	662	143	226	90	94	94	86	605.002214864321	691.23895244581	149.125401605599	222.403696232816	96.5539045427909	96.0452430683657	90.8530692405849	86.5524304768251	254.721864059639	1.91850517883819	0.706603973002809	2.71510669645012	0.006625442104601	0.608020805251304
ENSMUSG00000059555	Tor4a	119	133	76	73	66	51	87	58	100.833702477387	138.874291050291	79.2554581959826	71.8383620575025	70.8061966647134	52.1096531541133	84.0874151482009	58.3725693913471	82.0222060174422	0.652978681507851	0.240330692340758	2.71700079231666	0.006587644999396	0.608020805251304
ENSMUSG00000026604	Ptpn14	425	423	235	282	191	223	286	252	360.120365990668	441.682895596038	245.066219421788	277.512576715284	204.908841863034	227.852012811123	276.425295774546	253.618749769301	285.898369742723	0.484448959830082	0.17909081050269	2.70504644247398	0.006829484049584	0.608020805251304
ENSMUSG00000064080	Fbln2	372	262	229	248	175	186	205	194	315.211237996537	273.571911693055	238.809209564211	244.053613565214	187.743703277649	190.046970326766	198.137012705531	195.246180377954	230.352479938365	0.412431990407992	0.151532819864991	2.72173375230165	0.006494043957878	0.608020805251304
ENSMUSG00000042473	Tbc1d8b	183	166	169	181	100	128	170	145	155.063592885393	173.331821912393	176.239110988435	178.119774416547	107.282116158657	130.785011837775	164.308742243611	145.931423478368	153.882699240147	0.400994109476976	0.14782523071063	2.7126229233623	0.006675301814991	0.608020805251304
ENSMUSG00000042079	Hnrnpf	1543	1296	1383	1301	1066	1120	1391	1224	1307.44876405553	1353.24121203893	1442.24077217163	1280.2973840659	1143.62735825128	1144.36885358053	1344.43212035802	1231.86249887946	1280.93987042516	0.197061015962314	0.072943714384049	2.70154896314696	0.006901731744561	0.608020805251304
ENSMUSG00000035674	Ndufa3	2314	2286	1952	2088	3108	2504	2258	2123	1960.74947506448	2386.967137902	2035.61387366524	2054.77397227487	3334.32817021105	2558.48179407646	2182.40670580043	2136.63732444534	2331.24480667998	-0.333428382411517	0.123439459034823	-2.70114908975302	0.006910035545794	0.608020805251304
ENSMUSG00000057359	Gm17494	276	209	249	298	350	282	283	320	233.866402384528	218.231028793315	259.665909089469	293.257971138846	375.487406555298	288.135729205097	273.525729734952	322.055555262605	283.028216520514	-0.361156034019724	0.133269848444097	-2.70996056674604	0.006729120785419	0.608020805251304
ENSMUSG00000057278	Snrpg	492	425	344	481	648	460	393	464	416.892282511549	443.771230799802	358.735231834448	473.345919858339	695.188112708095	470.008636292002	379.843151186701	466.980555130777	463.095640040214	-0.391452964443621	0.14494663266645	-2.70066959985494	0.006920004502047	0.608020805251304
ENSMUSG00000050299	Gm9843	197	225	160	234	321	246	169	215	166.926381412145	234.937710423425	166.853596202069	230.276393444597	344.375592869288	251.352444625723	163.342220230413	216.381076192063	221.805676924965	-0.492376236164221	0.181133749318022	-2.71830201725544	0.006561791243679	0.608020805251304
ENSMUSG00000066554	Gm10167	169	179	97	154	249	180	168	188	143.200804358642	186.906000736858	101.154992697504	151.549421326786	267.132469235055	183.91642289687	162.375698217216	189.20763871678	173.180431023214	-0.517016779007013	0.191156759532854	-2.70467432211391	0.006837138530297	0.608020805251304
ENSMUSG00000062081	Gm6055	55	59	47	72	94	93	56	63	46.6038120693805	61.6058885110314	49.0132438843577	70.8542749060299	100.845189189137	95.0234851633831	54.1252327390719	63.4046874423254	67.6844767380896	-0.615538387489162	0.227906685368603	-2.70083515318397	0.006916561064265	0.608020805251304
ENSMUSG00000094843	Ppp1r2-ps1	29	40	22	50	73	57	45	52	24.5729190911279	41.7667040752755	22.9423694777844	49.2043575736319	78.3159447958193	58.240200584009	43.493490593897	52.3340277301733	46.3587517402148	-0.792052074419014	0.292006633415487	-2.71244548507235	0.00667887662002	0.608020805251304
ENSMUSG00000094955	Gm3699	30	48	20	55	85	71	36	43	25.420261128753	50.1200448903306	20.8566995252586	54.124793330995	91.1897987348581	72.5448112537656	34.7947924751176	43.2762152384125	49.0409270721864	-0.898056425473225	0.332607263345366	-2.70005055343821	0.006932894049817	0.608020805251304
ENSMUSG00000043618	Eif5al3-ps	16	29	12	17	48	28	26	36	13.5574726020016	30.2808604545747	12.5140197151552	16.7294815750348	51.4954157561552	28.6092213395132	25.1295723431405	36.2312499670431	26.8184117190773	-0.98486911738271	0.364457554411378	-2.70228756534718	0.006886417443242	0.608020805251304
ENSMUSG00000115819	Gm9108	17	40	10	21	61	41	27	35	14.4048146396267	41.7667040752755	10.4283497626293	20.6658301809254	65.4420908567805	41.8920741042872	26.0960943563382	35.2248263568474	31.9900980415888	-1.07144225552439	0.394042618241795	-2.71910246740602	0.006545932640595	0.608020805251304
ENSMUSG00000051118	Olfr77	14	14	11	17	41	26	15	17	11.8627885267514	14.6183464263464	11.4711847388922	16.7294815750348	43.9856676250492	26.565705529548	14.4978301979657	17.1092013733259	19.6050257491142	-1.07611305381118	0.395615779750341	-2.72009638869884	0.006526288945876	0.608020805251304
ENSMUSG00000078192	Gm7290	15	17	5	19	64	25	15	13	12.7101305643765	17.7508492319921	5.21417488131465	18.6976558779801	68.6605543415402	25.5439476245653	14.4978301979657	13.0835069325433	22.0198312065347	-1.37225308624021	0.507481093048526	-2.70404770746601	0.006850045355494	0.608020805251304
ENSMUSG00000084874	Gm12906	5	13	3	8	22	20	4	11	4.2367101881255	13.5741788244645	3.12850492878879	7.8726972117811	23.6020655549045	20.4351580996523	3.86608805279085	11.070659712152	10.9732578215824	-1.50074530509858	0.555130483835995	-2.70341000682995	0.006863202998916	0.608020805251304
ENSMUSG00000095550	Gm21671	8	2	1	4	13	12	4	10	6.7787363010008	2.08833520376378	1.04283497626293	3.93634860589055	13.9466751006254	12.2610948597914	3.86608805279085	10.0642361019564	6.74804365026025	-1.73755381873726	0.642776330491259	-2.70320131018092	0.006867513954853	0.608020805251304
ENSMUSG00000079436	Kcnj13	37	283	4	11	5	5	3	1	31.3516553921287	295.499431332574	4.17133990505172	10.824958666199	5.36410580793283	5.10878952491307	2.89956603959314	1.00642361019564	44.5282837848235	4.17273382825154	1.54869931946026	2.69434729893585	0.007052663468597	0.612681381750714
ENSMUSG00000110523	C230057M02Rik	146	94	129	97	71	67	104	87	123.711937493265	98.1517545768974	134.525711937918	95.4564536928458	76.1703024726462	68.4577796338351	100.518289372562	87.5588540870207	98.0688854083737	0.513680184560997	0.19062693947442	2.69468830574143	0.007045450374356	0.612681381750714
ENSMUSG00000101249	Gm29216	1253	1780	984	1748	3101	2340	1750	1866	1061.71957314425	1858.61833134976	1026.14961664272	1720.18434077417	3326.81842207994	2390.91349765932	1691.413523096	1877.98645662507	1869.2254701714	-0.78285814649434	0.29046393651724	-2.69519912138171	0.007034657818232	0.612681381750714
ENSMUSG00000085010	Gssos1	2	2	5	4	0	0	3	0	1.6946840752502	2.08833520376378	5.21417488131465	3.93634860589055	0	0	2.89956603959314	0	1.97913860072654	4.05066369970958	1.51298801594504	2.67726092805796	0.007422680398332	0.614727895287549
ENSMUSG00000010122	Slc47a1	413	259	141	113	102	56	111	64	349.952261539166	270.439408887409	147.039731653073	111.201848116408	109.42775848183	57.2184426790264	107.283943464946	64.411111052521	152.121813234297	1.35747376076091	0.507110784688361	2.67687811371461	0.007431166317349	0.614727895287549
ENSMUSG00000063268	Parp10	187	147	105	113	80	96	134	99	158.452961035894	153.492637476637	109.497672507608	111.201848116408	85.8256929269253	98.0887588783309	129.513949768493	99.6359374093684	118.213682264958	0.487920636078578	0.181750289125116	2.6845659416954	0.007262405545295	0.614727895287549
ENSMUSG00000015053	Gata2	258	269	182	204	179	119	204	157	218.614245707276	280.881084906228	189.795965679853	200.753778900418	192.034987923995	121.589190692931	197.170490692333	158.008506800716	194.856031412969	0.468595108245858	0.175088502355391	2.67633283706268	0.007443268593812	0.614727895287549
ENSMUSG00000082286	Pisd-ps1	7595	6118	7666	6242	3556	5545	7058	6224	6435.56277576264	6388.21738831339	7994.37292803162	6142.6719994922	3814.95205060183	5665.64758312859	6821.71236914945	6263.98054985767	6190.88970554217	0.364328515121425	0.136083586582211	2.67724068913576	0.007423128820699	0.614727895287549
ENSMUSG00000034573	Ptpn13	1273	1041	828	1126	694	863	1046	909	1078.66641389675	1086.97847355905	863.467360345706	1108.08213255819	744.537886141077	881.777071999995	1010.98202580481	914.839061667837	961.166303246676	0.28154854640802	0.104841327642483	2.68547292121408	0.007242724341563	0.614727895287549
ENSMUSG00000033420	Antxr1	1401	1028	1018	1198	896	921	1163	1017	1187.12619471277	1073.40429473458	1061.60600583566	1178.93640746422	961.247760781563	941.039030488987	1124.06510134894	1023.53281156897	1068.86970086696	0.206615452589116	0.077150093443684	2.67809724352355	0.007404171861482	0.614727895287549
ENSMUSG00000057841	Rpl32	5435	4520	4349	4695	6467	4907	4744	4846	4605.30397449242	4719.63756050613	4535.28931176748	4620.28917616403	6937.93445198032	5013.76603974968	4585.18043060994	4877.12881500807	4986.81622003476	-0.282035144048274	0.105416796317907	-2.67542890601358	0.007463370059297	0.614727895287549
ENSMUSG00000080921	Rpl38-ps2	276	270	237	285	438	312	270	268	233.866402384528	281.92525250811	247.151889374314	280.464838169702	469.895668774916	318.788466354575	260.960943563382	269.721527532432	295.346873582745	-0.435047142157809	0.162047602733934	-2.68468730680399	0.007259769177792	0.614727895287549
ENSMUSG00000078193	Gm2000	123	155	79	119	219	160	148	147	104.223070627887	161.845978291693	82.3839631247714	117.106371025244	234.947834387458	163.481264797218	143.045257953261	147.944270698759	144.372251363286	-0.581189107062983	0.217148706775166	-2.67645668120299	0.007440518354199	0.614727895287549
ENSMUSG00000100863	Gm12669	54	69	52	68	109	88	73	74	45.7564700317554	72.0475645298502	54.2274187656723	66.9179263001393	116.937506612936	89.91469563847	70.556106963433	74.4753471544774	73.8541294995917	-0.601008928044602	0.223691324052892	-2.68677799905414	0.007214488502489	0.614727895287549
ENSMUSG00000106755	Tpi-rs11	46	61	27	42	99	67	53	54	38.9777337307546	63.6942237147952	28.1565443590991	41.3316603618508	106.20929499707	68.4577796338351	51.2256666994787	54.3468749505646	56.549972305931	-0.772277330161679	0.288335443139081	-2.67839888760801	0.007397506327188	0.614727895287549
ENSMUSG00000061848	Gm5805	54	102	45	87	157	116	64	75	45.7564700317554	106.505095391953	46.9275739318318	85.6155821781194	168.432922369091	118.523916977983	61.8574088446536	75.481770764673	88.6375925612575	-0.802956451899303	0.299506377731299	-2.68093273332454	0.007341727221649	0.614727895287549
ENSMUSG00000083364	Llph-ps2	18	38	22	30	51	52	25	35	15.2521566772518	39.6783688715117	22.9423694777844	29.5226145441791	54.7138792409149	53.1314110590959	24.1630503299428	35.2248263568474	34.328584569691	-0.865640772317281	0.322425021077562	-2.68478162589325	0.007257720913654	0.614727895287549
ENSMUSG00000095288	Gm7618	50	65	23	56	131	93	73	54	42.367101881255	67.8708941223227	23.9852044540474	55.1088804824677	140.53957216784	95.0234851633831	70.556106963433	54.3468749505646	68.7247650231642	-0.893484958607905	0.332907370510997	-2.68388458097653	0.007277222439002	0.614727895287549
ENSMUSG00000105866	Gm6745	27	33	15	40	81	42	30	35	22.8782350158777	34.4575308621023	15.6425246439439	39.3634860589055	86.8985140885118	42.9138320092698	28.9956603959314	35.2248263568474	38.2968261789237	-0.958918465856053	0.356816853000254	-2.68742481694207	0.007200531008735	0.614727895287549
ENSMUSG00000080198	Rpl10a-ps4	24	39	15	42	87	55	46	41	20.3362089030024	40.7225364733936	15.6425246439439	41.3316603618508	93.3354410580312	56.1966847740437	44.4600126070947	41.2633680180213	44.1610546049227	-0.968852340595546	0.360720083007743	-2.68588411412278	0.007233817349355	0.614727895287549
ENSMUSG00000105233	Gm20568	8	11	5	15	31	15	16	26	6.7787363010008	11.4858436207008	5.21417488131465	14.7613072720896	33.2574560091835	15.3263685747392	15.4643522111634	26.1670138650867	16.0569065919098	-1.21465504477104	0.453919085924357	-2.67592855739372	0.007452252886749	0.614727895287549
ENSMUSG00000054404	Slfn5	337	313	278	276	167	230	266	250	285.554266679659	326.824459389031	289.908123401094	271.608053806448	179.161133984957	235.004318146001	257.094855510591	251.60590254891	262.095139183336	0.364757609678445	0.136567232757163	2.67090137446835	0.007564786997459	0.6195105363163
ENSMUSG00000076135	Gm24276	2	4	1	3	12	10	4	7	1.6946840752502	4.17667040752755	1.04283497626293	2.95226145441791	12.8738539390388	10.2175790498261	3.86608805279085	7.04496527136948	5.48361715331048	-1.87605954147807	0.702161498837876	-2.67183481945831	0.007543777236279	0.6195105363163
ENSMUSG00000105452	Gm5276	18	50	13	34	80	53	27	37	15.2521566772518	52.2083800940944	13.5568546914181	33.4589631500697	85.8256929269253	54.1531689640785	26.0960943563382	37.2376735772387	39.7236230546768	-1.0751589917045	0.40287739378642	-2.66870022564355	0.007614537791524	0.621803156055859
ENSMUSG00000109933	Gm7600	41	50	27	57	100	68	51	50	34.7410235426291	52.2083800940944	28.1565443590991	56.0929676339403	107.282116158657	69.4795375388177	49.2926226730833	50.321180509782	55.9467965637628	-0.778614884261196	0.292299327699296	-2.66375872428348	0.007727296424075	0.629213273779132
ENSMUSG00000107462	Gm7384	9	9	5	16	37	18	16	18	7.6260783386259	9.39750841693699	5.21417488131465	15.7453944235622	39.6943829787029	18.391642289687	15.4643522111634	18.1156249835215	16.2061448154393	-1.24480669398563	0.467569343534423	-2.6622932217411	0.007761023772053	0.630164262582559
ENSMUSG00000038676	Ucn	117	52	2	6	2	4	4	2	99.1390184021367	54.2967152978582	2.08566995252586	5.90452290883582	2.14564232317313	4.08703161993045	3.86608805279085	2.01284722039128	21.6921919722053	3.58926747654777	1.35498013150322	2.6489447284853	0.008074353569786	0.64438537354314
ENSMUSG00000095134	Mid1-ps1	25	44	40	13	6	10	17	16	21.1835509406275	45.9433744828031	41.7133990505172	12.7931329691443	6.4369269695194	10.2175790498261	16.4308742243611	16.1027777631302	21.3527019312411	1.32749308814215	0.501076204815334	2.6492838322494	0.008066255614546	0.64438537354314
ENSMUSG00000046794	Ppp1r3b	129	140	64	81	71	39	61	40	109.307122853638	146.183464263464	66.7414384808275	79.7110592692836	76.1703024726462	39.8485582943219	58.9578428050604	40.2569444078256	77.1470916058834	0.826161950200349	0.312030061715753	2.64769985833271	0.008104144084931	0.64438537354314
ENSMUSG00000035129	Gm6781	29	60	23	61	90	76	54	65	24.5729190911279	62.6500561129133	23.9852044540474	60.0293162398309	96.5539045427909	77.6536007786786	52.1921887126764	65.4175346627166	57.8818405743478	-0.84085684497185	0.317472145310924	-2.64860038082503	0.008082584198801	0.64438537354314
ENSMUSG00000080977	Gm13772	48	88	25	69	133	97	68	75	40.6724178060048	91.8867489656061	26.0708744065732	67.902013451612	142.685214491013	99.1105167833135	65.7234968974444	75.481770764673	76.19163169578	-0.856492617626407	0.323112327326283	-2.65075809615122	0.008031133965158	0.64438537354314
ENSMUSG00000108761	Atp6v0c-ps1	33	67	20	55	95	94	70	68	27.9622872416283	69.9592293260865	20.8566995252586	54.124793330995	101.918010350724	96.0452430683657	67.6565409238398	68.4368054933036	63.3699511575252	-0.88613091102017	0.334744836593124	-2.64718320987053	0.00811653666686	0.64438537354314
ENSMUSG00000094530	Gm21399	41	45	16	66	113	87	53	43	34.7410235426291	46.9875420846849	16.6853596202069	64.9497519971941	121.228791259282	88.8929377334874	51.2256666994787	43.2762152384125	58.4984110219219	-0.975016995414058	0.368147157288645	-2.64844363486311	0.008086333241992	0.64438537354314
ENSMUSG00000080054	Rpl12-ps1	14	36	18	29	71	38	26	32	11.8627885267514	37.590033667748	18.7710295727327	28.5385273927065	76.1703024726462	38.8268003893393	25.1295723431405	32.2055555262605	33.6368262364156	-1.01406603878471	0.382597014645105	-2.65048079302278	0.008037729732827	0.64438537354314
ENSMUSG00000053332	Gas5	4728	3816	4320	4608	5694	4698	4555	4506	4006.23315389147	3984.54356878128	4505.04709745585	4534.67359398591	6108.64369407391	4800.21863760832	4402.50777011558	4534.94478754156	4609.60153793174	-0.264096114707979	0.099913437944354	-2.64324919792137	0.008211457496155	0.649294252660102
ENSMUSG00000097520	4930488L21Rik	59	47	32	46	67	69	55	66	49.9931802198809	49.0758772884487	33.3707192404137	45.2680089677413	71.8790178262999	70.5012954438003	53.1587107258742	66.4239582729123	54.9588459981714	-0.588245577473877	0.222589229837052	-2.64274052210211	0.008223803207129	0.649294252660102
ENSMUSG00000038167	Plekhg6	35	16	14	6	6	5	17	6	29.6569713168785	16.7066816301102	14.599689667681	5.90452290883582	6.4369269695194	5.10878952491307	16.4308742243611	6.03854166117384	12.6103747379341	1.5170788770615	0.574923971050213	2.63874695342804	0.008321306815603	0.653382610155873
ENSMUSG00000004891	Nes	775	626	511	578	412	498	570	508	656.690079159453	653.648918778062	532.888672870357	568.802373551184	442.002318573665	508.835436681341	550.917547522696	511.263193979385	553.131067639518	0.282169654683191	0.106904698873066	2.63945044191393	0.008304056346942	0.653382610155873
ENSMUSG00000082319	Actr3-ps	71	139	67	102	181	147	107	114	60.1612846713821	145.139296661582	69.8699434096163	100.376889450209	194.180630247168	150.198412032444	103.417855412155	114.732291562303	117.259575430858	-0.678142956989814	0.257161498576651	-2.63703144033314	0.008363507952697	0.65489704327683
ENSMUSG00000066113	Adamtsl1	692	458	447	439	333	435	493	367	586.360690036569	478.228761661905	466.147234389529	432.014259496488	357.249446808326	444.464688667437	476.495352506472	369.3574649418	451.289737313566	0.322747248739773	0.122510322068618	2.63444943487294	0.008427385514759	0.656364771534465
ENSMUSG00000086583	Gm15500	246	277	192	276	439	318	273	247	208.446141255775	289.234425721283	200.224315442482	271.608053806448	470.968489936502	324.919013784471	263.860509602975	248.586631718323	284.730947658533	-0.496858720539737	0.188602888145913	-2.63441734866404	0.008428182049374	0.656364771534465
ENSMUSG00000048164	Gm7204	27	33	20	45	83	51	32	32	22.8782350158777	34.4575308621023	20.8566995252586	44.2839218162687	89.044156411685	52.1096531541133	30.9287044223268	32.2055555262605	40.8455570917366	-0.912592834919353	0.346903376898493	-2.63068305381871	0.008521346488588	0.661816858669374
ENSMUSG00000098202	B830012L14Rik	77	45	63	73	90	91	76	88	65.2453368971327	46.9875420846849	65.6986035045646	71.8383620575025	96.5539045427909	92.9799693534178	73.4556730030261	88.5652776972164	75.165583642542	-0.51736558345945	0.197027198172653	-2.62585870508136	0.00864306870045	0.668673468044538
ENSMUSG00000113606	Gm47441	86	114	50	72	153	118	71	85	72.8714152357586	119.035106614535	52.1417488131465	70.8542749060299	164.141637722745	120.567432787948	68.6230629370375	85.5460068666294	94.2225857354788	-0.686107587997136	0.261341148179096	-2.6253331814665	0.008656421509971	0.668673468044538
ENSMUSG00000085521	4930526A20Rik	63	70	52	66	115	89	66	66	53.3825483703813	73.0917321317321	54.2274187656723	64.9497519971941	123.374433582455	90.9364535434526	63.790452871049	66.4239582729123	73.7720936918561	-0.596256921609149	0.22730513402353	-2.62315641998401	0.008711926499339	0.671147092392502
ENSMUSG00000087701	Gm13493	254	304	134	296	535	391	287	338	215.224877556775	317.426950972094	139.739886819233	291.289796835901	573.959321448813	399.507340848202	277.391817787743	340.171180246126	319.338896564361	-0.818798318397478	0.31255188410325	-2.61971966909338	0.008800207474007	0.676125617781153
ENSMUSG00000025780	Itih5	2275	1588	1512	1691	1198	1471	1684	1505	1927.7031355971	1658.13815178844	1576.76648410955	1664.09137314023	1285.23975158071	1503.00587822942	1627.62307022495	1514.66753334444	1594.65442225185	0.237686643530228	0.090810967603886	2.61737816259166	0.008860811454664	0.67895670827278
ENSMUSG00000023089	Ndufa5	2146	2013	1948	1986	2725	2231	2041	2004	1818.39601274346	2101.90938258824	2031.44253376019	1954.39708282466	2923.43766532339	2279.54188601621	1972.67142893653	2016.87291483206	2137.33361337809	-0.284568985949336	0.109113030638784	-2.60802018130535	0.009106758511353	0.691724582058205
ENSMUSG00000109387	Gm45182	30	16	45	36	58	47	37	55	25.420261128753	16.7066816301102	46.9275739318318	35.4271374530149	62.2236273720208	48.0226215341828	35.7613144883153	55.3532985607602	40.7303145123737	-0.786315951726135	0.301575138803743	-2.60736330867727	0.009124249236764	0.691724582058205
ENSMUSG00000110126	Gm9347	15	27	10	21	50	39	29	26	12.7101305643765	28.192525250811	10.4283497626293	20.6658301809254	53.6410580793283	39.8485582943219	28.0291383827336	26.1670138650867	27.4603255475266	-0.997367910577928	0.382132166828946	-2.6100077333306	0.009054017586817	0.691724582058205
ENSMUSG00000113340	Gm7695	10	16	6	16	30	21	8	19	8.473420376251	16.7066816301102	6.25700985757758	15.7453944235622	32.184634847597	21.4569160046349	7.73217610558169	19.1220485937172	15.959785229879	-1.14620174010389	0.439299526461695	-2.60915769551561	0.009076540399381	0.691724582058205
ENSMUSG00000089844	A530032D15Rik	31	29	33	41	56	54	23	38	26.2676031663781	30.2808604545747	34.4135542166767	40.3475732103781	60.0779850488477	55.1749268690611	22.2300063035474	38.2440971874343	38.3795758071123	-0.73855526425816	0.283542458515368	-2.60474310664175	0.009194316826936	0.693358230160083
ENSMUSG00000100839	Gm5920	2	6	1	5	14	9	6	13	1.6946840752502	6.26500561129133	1.04283497626293	4.92043575736319	15.0194962622119	9.19582114484352	5.79913207918627	13.0835069325433	7.12761460486909	-1.66563028825518	0.639287337680222	-2.6054485832603	0.00917540438109	0.693358230160083
ENSMUSG00000083328	Gm11826	8	19	17	19	36	38	18	20	6.7787363010008	19.8391844357559	17.7281945964698	18.6976558779801	38.6215618171164	38.8268003893393	17.3973962375588	20.1284722039128	22.2522502323917	-1.025398533912	0.393878428370767	-2.60333762921072	0.009232098658359	0.694375294090973
ENSMUSG00000036545	Adamts2	2685	1791	1977	2045	1674	1657	1785	1494	2275.11337102339	1870.10417497046	2061.68474807181	2012.45822476154	1795.90262449591	1693.05284855619	1725.24179355792	1503.59687363229	1867.14433238369	0.257662017758909	0.099175976520142	2.59802854279513	0.009376069992166	0.703352904057991
ENSMUSG00000072940	Gm10443	47	61	24	36	106	53	40	51	39.8250757683797	63.6942237147952	25.0280394303103	35.4271374530149	113.719043128176	54.1531689640785	38.6608805279085	51.3276041199777	52.7293966383301	-0.849020803678288	0.327143702344314	-2.59525339352156	0.009452120534378	0.705217879701816
ENSMUSG00000115312	Gm8518	23	27	13	25	50	46	25	23	19.4888668653773	28.192525250811	13.5568546914181	24.6021787868159	53.6410580793283	47.0008636292002	24.1630503299428	23.1477430344997	29.2241425834242	-0.905783032449674	0.349115874518451	-2.5945054308947	0.009472711701671	0.705217879701816
ENSMUSG00000073656	Gm10558	13	16	25	14	42	24	19	30	11.0154464891263	16.7066816301102	26.0708744065732	13.7772201206169	45.0584887866358	24.5221897195827	18.3639182507565	30.1927083058692	23.2134409636589	-0.959425592413515	0.369802919559572	-2.59442406121664	0.009474954193538	0.705217879701816
ENSMUSG00000112145	Gm6218	9	37	12	26	73	31	25	35	7.6260783386259	38.6342012696298	12.5140197151552	25.5862659382886	78.3159447958193	31.674495054461	24.1630503299428	35.2248263568474	31.7173602248463	-1.16264486480602	0.449473536132169	-2.58668146474399	0.009690512939458	0.719388442396518
ENSMUSG00000104418	Gm37070	32	52	11	41	91	70	34	34	27.1149452040032	54.2967152978582	11.4711847388922	40.3475732103781	97.6267257043775	71.5230533487829	32.8617484487222	34.2184027466518	46.1825435874583	-1.02899138368475	0.398023821935262	-2.58525074876578	0.009730820097085	0.72050924661863
ENSMUSG00000086040	Wipf3	846	796	860	801	576	602	762	736	716.851363830835	831.157411097983	896.838079586119	788.253808329582	617.944989073862	615.098258799533	736.489774056656	740.727777103991	742.92018273482	0.269751475326987	0.104456548082537	2.58242762448784	0.009810793771588	0.722686331922084
ENSMUSG00000113753	Gm5791	19	23	12	26	52	34	24	25	16.0994987148769	24.0158548432834	12.5140197151552	25.5862659382886	55.7867004025014	34.7397687694089	23.1965283167451	25.160590254891	27.1374033693938	-0.925462689553541	0.358343293632833	-2.58261478866071	0.009805473699116	0.722686331922084
ENSMUSG00000058492	Scp2-ps2	62	53	54	74	115	87	67	63	52.5352063327562	55.34088289974	56.3130887181982	72.8224492089752	123.374433582455	88.8929377334874	64.7569748842467	63.4046874423254	72.180082600273	-0.604800739370013	0.234443000426217	-2.5797346829314	0.009887624893226	0.726473540034202
ENSMUSG00000053550	Shisa7	4546	3271	3113	3856	2173	2959	3644	3390	3852.01690304371	3415.47222575565	3246.3452811065	3794.64005607849	2331.24038412761	3023.38164084355	3522.00621609246	3411.77603856322	3324.6098432014	0.287269724853301	0.111488363190461	2.57667900606401	0.009975453914588	0.72917761721951
ENSMUSG00000037152	Ndufc1	1234	1084	1273	1229	1598	1294	1167	1248	1045.62007442937	1131.87768043997	1327.52892478271	1209.44310915987	1714.36821621533	1322.1547290475	1127.93118940173	1256.01666552416	1266.86757362508	-0.292336015169643	0.113451799279583	-2.57674199110081	0.009973636550153	0.72917761721951
ENSMUSG00000066475	Gm10268	16	11	10	12	37	19	12	16	13.5574726020016	11.4858436207008	10.4283497626293	11.8090458176716	39.6943829787029	19.4134001946697	11.5982641583725	16.1027777631302	16.7611921122348	-1.08152629661974	0.419929045343749	-2.57549771470182	0.010009593475252	0.729806609990213
ENSMUSG00000115785	Gm6740	19	36	17	26	51	44	29	34	16.0994987148769	37.590033667748	17.7281945964698	25.5862659382886	54.7138792409149	44.957347819235	28.0291383827336	34.2184027466518	32.3653451383648	-0.840644401987002	0.326592312201132	-2.57398711047825	0.010053401846995	0.731135567910877
ENSMUSG00000061808	Ttr	226	55627	149	757	58	68	61	789	191.499300503273	58083.9111898838	155.382411463176	744.953973664786	62.2236273720208	69.4795375388177	58.9578428050604	794.06822844436	7520.05951395941	5.26260501441964	2.0519256155879	2.56471529690995	0.010326049465182	0.731697144616646
ENSMUSG00000027868	Tbx15	61	29	24	20	19	8	18	10	51.6878642951311	30.2808604545747	25.0280394303103	19.6817430294527	20.3836020701448	8.17406323986091	17.3973962375588	10.0642361019564	22.8372256073737	1.17515958413437	0.457793852958883	2.56700603675409	0.010258082654501	0.731697144616646
ENSMUSG00000087338	Scpep1os	26	16	28	20	8	10	27	14	22.0308929782526	16.7066816301102	29.199379335362	19.6817430294527	8.58256929269253	10.2175790498261	26.0960943563382	14.089930542739	18.3256087768467	1.0484903310179	0.408867255180233	2.56437833486007	0.010336080951725	0.731697144616646
ENSMUSG00000040605	Bace2	163	174	122	141	104	92	146	117	138.116752132891	181.685162727448	127.225867104077	138.756288357642	111.573400805003	94.0017272584004	141.112213926866	117.75156239289	131.277871838152	0.430579896878172	0.167996466355513	2.56302948638801	0.010376323575343	0.731697144616646
ENSMUSG00000034037	Fgd5	720	591	545	523	378	521	530	439	610.086267090072	617.103052712196	568.345062063296	514.677580220189	405.526399079722	532.335868495942	512.256666994787	441.819964875886	525.268857691511	0.295352338705838	0.114927005467168	2.56991241967244	0.010172422839079	0.731697144616646
ENSMUSG00000003575	Crtc1	6006	4800	4653	4829	3825	4215	5023	4679	5089.13627797635	5012.00448903306	4852.31114455141	4752.15685446137	4103.54094306861	4306.70956950172	4854.84007229211	4709.0560721054	4709.96942787375	0.167622218246529	0.06545631594885	2.56082573265373	0.010442372164014	0.731697144616646
ENSMUSG00000082260	Gm7429	41	79	32	99	155	112	91	84	34.7410235426291	82.4892405486691	33.3707192404137	97.4246279957911	166.287280045918	114.436885358053	87.9535032009918	84.5395832564338	87.6553578986124	-0.858489812948583	0.334654611859656	-2.56530100744169	0.010308633261637	0.731697144616646
ENSMUSG00000066116	Gm10154	42	64	27	77	120	107	55	47	35.5883655802542	66.8267265204408	28.1565443590991	75.7747106633931	128.738539390388	109.32809583314	53.1587107258742	47.3019096791951	68.109200343973	-0.874474815722619	0.341330942960751	-2.56195587817883	0.010408454050253	0.731697144616646
ENSMUSG00000112515	Gm4928	24	51	14	32	76	58	38	39	20.3362089030024	53.2525476959763	14.599689667681	31.4907888471244	81.534408280579	59.2619584889916	36.727836501513	39.25052079763	42.0567448978122	-0.94244516297605	0.367735798164945	-2.5628322498897	0.010382219756305	0.731697144616646
ENSMUSG00000108772	Gm6063	23	43	19	27	86	48	40	32	19.4888668653773	44.8992068809212	19.8138645489957	26.5703530897612	92.2626198964447	49.0443794391654	38.6608805279085	32.2055555262605	40.3682158468543	-0.953818735341117	0.372478678498879	-2.56073378262908	0.010445136104531	0.731697144616646
ENSMUSG00000081810	Gm11878	34	36	12	45	97	60	52	39	28.8096292792534	37.590033667748	12.5140197151552	44.2839218162687	104.063652673897	61.3054742989568	50.259144686281	39.25052079763	47.2595496168987	-0.972481130163194	0.379693375634632	-2.56122753929472	0.010430301827077	0.731697144616646
ENSMUSG00000105015	Gm6059	9	9	8	21	29	28	21	24	7.6260783386259	9.39750841693699	8.34267981010344	20.6658301809254	31.1118136860104	28.6092213395132	20.2969622771519	24.1541666446954	18.7755325867453	-1.07629429524051	0.418901171589406	-2.56932748876496	0.01018961114228	0.731697144616646
ENSMUSG00000082165	Gm7091	10	10	4	9	26	23	14	12	8.473420376251	10.4416760188189	4.17133990505172	8.85678436325374	27.8933502012507	23.5004318146001	13.531308184768	12.0770833223477	13.6181742732927	-1.21233688142672	0.472624553082233	-2.56511616571851	0.010314126736599	0.731697144616646
ENSMUSG00000111904	Gm2395	8	5	5	4	16	17	7	9	6.7787363010008	5.22083800940944	5.21417488131465	3.93634860589055	17.1651385853851	17.3698843847044	6.76565409238398	9.05781249176076	8.93857341898121	-1.37091919992366	0.534586047513764	-2.56445001941127	0.010333946149789	0.731697144616646
ENSMUSG00000107836	Gm5315	0	1	1	0	6	5	0	2	0	1.04416760188189	1.04283497626293	0	6.4369269695194	5.10878952491307	0	2.01284722039128	1.95569578662107	-3.49918070877857	1.36128466741746	-2.57049887692997	0.010155215603326	0.731697144616646
ENSMUSG00000022246	Rai14	300	267	194	240	164	193	221	182	254.20261128753	278.792749702464	202.309985395008	236.180916353433	175.942670500197	197.199275661644	213.601364916694	183.169097055607	217.674833859072	0.354201778724822	0.138531316635564	2.55683543134601	0.010562917676296	0.738138753315954
ENSMUSG00000055435	Maf	573	568	440	411	357	371	415	346	485.526987559182	593.087197868912	458.847389555689	404.459819255254	382.997154686404	379.07218274855	401.10663547705	348.222569127692	431.664992034842	0.340205164187212	0.133289442766174	2.55237892159264	0.010699008907613	0.73861925987557
ENSMUSG00000024112	Cacna1h	3119	2222	2430	2557	1746	1958	2250	2314	2642.85981535269	2320.14041138155	2534.08899231892	2516.31084631553	1873.14574813014	2000.60197795596	2174.67452969485	2328.86423399271	2298.83581939279	0.237513907829555	0.093046712850422	2.55263082975724	0.010691274857392	0.73861925987557
ENSMUSG00000008348	Ubc	5781	5040	4084	4623	5450	5749	4742	4835	4898.4843195107	5262.60471348471	4258.9380430578	4549.434901258	5846.87533064678	5874.08619574505	4583.24738658355	4866.05815529592	5017.46613069782	-0.231041040085313	0.090437195659463	-2.55471256489738	0.01062755175942	0.73861925987557
ENSMUSG00000082110	Gm11196	6	16	9	15	34	27	13	14	5.0840522257506	16.7066816301102	9.38551478636636	14.7613072720896	36.4759194939432	27.5874634345306	12.5647861715703	14.089930542739	17.0819569446375	-1.16268298594403	0.455193006871494	-2.55426372635875	0.010641262329466	0.73861925987557
ENSMUSG00000102623	Gm37673	9	1	6	11	24	24	12	10	7.6260783386259	1.04416760188189	6.25700985757758	10.824958666199	25.7477078780776	24.5221897195827	11.5982641583725	10.0642361019564	12.2105765402842	-1.41825651420925	0.55536115987245	-2.55375531579303	0.010656811630863	0.73861925987557
ENSMUSG00000095477	Gm25076	12	7	11	7	2	5	11	0	10.1681044515012	7.30917321317321	11.4711847388922	6.88861006030846	2.14564232317313	5.10878952491307	10.6317421451748	0	6.71540580714202	1.94688381937023	0.765301500337701	2.54394355494029	0.010960879522955	0.744568284052318
ENSMUSG00000000154	Slc22a18	37	50	22	25	11	16	24	18	31.3516553921287	52.2083800940944	22.9423694777844	24.6021787868159	11.8010327774522	16.3481264797218	23.1965283167451	18.1156249835215	25.070737038533	0.995534873350848	0.391367927403845	2.5437313679605	0.010967539539765	0.744568284052318
ENSMUSG00000049760	Micos13	1741	1490	1429	1511	2002	1713	1578	1503	1475.2224875053	1555.80972680401	1490.21118107973	1486.95568587515	2147.7879654963	1750.27129123522	1525.17173682599	1512.65468612405	1618.01059511822	-0.259220597935197	0.101852972118912	-2.54504696861041	0.010926304039981	0.744568284052318
ENSMUSG00000070729	Gm12966	122	189	88	134	194	177	120	170	103.375728590262	197.347676755677	91.7694779111378	131.867678297333	208.127305347794	180.851149181923	115.982641583725	171.092013733259	150.051708925139	-0.545617476293834	0.214293255033329	-2.54612529082622	0.010892608477578	0.744568284052318
ENSMUSG00000078126	Rpl23a-ps3	64	62	45	45	91	73	62	67	54.2298904080064	64.738391316677	46.9275739318318	44.2839218162687	97.6267257043775	74.5883270637308	59.9243648182581	67.4303818831079	63.7186971177823	-0.562574564276848	0.221051474690838	-2.54499349105751	0.010927977522268	0.744568284052318
ENSMUSG00000083192	NA	21	29	18	20	58	33	27	28	17.7941827901271	30.2808604545747	18.7710295727327	19.6817430294527	62.2236273720208	33.7180108644262	26.0960943563382	28.1798610854779	29.5931761906438	-0.877762355177649	0.344640130763082	-2.54689537528366	0.010868601331519	0.744568284052318
ENSMUSG00000082109	Rpl19-ps12	21	20	12	18	56	28	29	25	17.7941827901271	20.8833520376378	12.5140197151552	17.7135687265075	60.0779850488477	28.6092213395132	28.0291383827336	25.160590254891	26.3477572869266	-0.964101239499984	0.378957142541244	-2.5440904294212	0.010956271606584	0.744568284052318
ENSMUSG00000051985	Igfn1	12	94	33	6	3	3	3	5	10.1681044515012	98.1517545768974	34.4135542166767	5.90452290883582	3.2184634847597	3.06527371494784	2.89956603959314	5.0321180509782	20.3566696805238	3.0029445044091	1.18144647425384	2.5417524787195	0.011029825265099	0.745256349649648
ENSMUSG00000076137	Gm26384	32	63	36	74	114	81	56	61	27.1149452040032	65.7825589185589	37.5420591454655	72.8224492089752	122.301612420869	82.7623903035917	54.1252327390719	61.3918402219341	65.4803860203086	-0.78945688832156	0.310585012748644	-2.54183832418362	0.011027116763765	0.745256349649648
ENSMUSG00000066902	Rps23-ps2	18	14	12	18	41	32	29	24	15.2521566772518	14.6183464263464	12.5140197151552	17.7135687265075	43.9856676250492	32.6962529594436	28.0291383827336	24.1541666446954	23.6204146446478	-0.926627216607041	0.365010218052176	-2.53863363483865	0.011128629269623	0.748393772129638
ENSMUSG00000114254	Gm48067	10	12	5	15	30	19	12	17	8.473420376251	12.5300112225827	5.21417488131465	14.7613072720896	32.184634847597	19.4134001946697	11.5982641583725	17.1092013733259	15.1605517907754	-1.12090270289421	0.44145649024658	-2.53910119719414	0.011113767122195	0.748393772129638
ENSMUSG00000041258	Zfp236	1979	1646	1515	1747	1199	1424	1834	1614	1676.88989246007	1718.69987269759	1579.89498903834	1719.2002536227	1286.31257274229	1454.98325669524	1772.6013722046	1624.36770685576	1604.11873953957	0.218419680222266	0.086128625304793	2.5359708163148	0.011213607864365	0.750576408363974
ENSMUSG00000104369	Gm38082	14	7	10	10	24	22	11	15	11.8627885267514	7.30917321317321	10.4283497626293	9.84087151472637	25.7477078780776	22.4786739096175	10.6317421451748	15.0963541529346	14.1744576378856	-1.0669147178036	0.420663972381595	-2.53626359244233	0.011204236378349	0.750576408363974
ENSMUSG00000084284	Tpt1-ps6	44	62	26	75	136	103	80	55	37.2830496555044	64.738391316677	27.1137093828362	73.8065363604478	145.903677975773	105.241064213209	77.3217610558169	55.3532985607602	73.3451860651281	-0.8656379580957	0.341997480601715	-2.53112378656323	0.01136977149339	0.759251025823785
ENSMUSG00000106874	Gm20186	38	27	30	19	12	13	27	17	32.1989974297538	28.192525250811	31.2850492878879	18.6976558779801	12.8738539390388	13.282852764774	26.0960943563382	17.1092013733259	22.4670287849887	0.919833165997929	0.3645591876389	2.5231380724631	0.011631272224444	0.761786963068857
ENSMUSG00000063450	Syne2	1148	951	774	903	622	762	912	831	972.748659193615	993.003389389675	807.154271627507	888.630697779791	667.294762506844	778.579523596751	881.468076036313	836.338020072577	853.152175025384	0.256081864772832	0.101508757531099	2.52275637098972	0.011643904008198	0.761786963068857
ENSMUSG00000029165	Agbl5	1366	1005	945	1062	819	878	1077	965	1157.46922339589	1049.3884398913	985.479052568468	1045.10055486394	878.640531339398	897.103440574735	1040.94420821394	971.198783838793	1003.16552933581	0.205856972126296	0.081452728476204	2.52731831060067	0.011493727745623	0.761786963068857
ENSMUSG00000096842	Gm10736	673	502	496	696	858	696	604	578	570.261191321692	524.172136144708	517.246148226413	684.924657424956	920.480556641274	711.143501867899	583.779295971418	581.71284669308	636.71504178643	-0.356065409371634	0.141048342334134	-2.52442108485145	0.011588902106209	0.761786963068857
ENSMUSG00000062611	Rps3a2	120	101	91	95	140	127	104	114	101.681044515012	105.460927790071	94.8979828399266	93.4882793899005	150.194962622119	129.763253932792	100.518289372562	114.732291562303	111.342129003086	-0.405412360637422	0.160642056107675	-2.52370002264963	0.011612697531068	0.761786963068857
ENSMUSG00000093798	Gm8355	534	866	400	594	1179	1034	703	797	452.480648091803	904.249143229715	417.133990505172	584.547767974747	1264.85614951056	1056.49767375202	679.464975277991	802.119617325925	770.168745708492	-0.77721786117203	0.30795405882303	-2.52381106500912	0.011609030254258	0.761786963068857
ENSMUSG00000081378	Rps13-ps4	45	50	29	46	104	56	40	42	38.1303916931295	52.2083800940944	30.242214311625	45.2680089677413	111.573400805003	57.2184426790264	38.6608805279085	42.2697916282169	51.9464388383431	-0.780388537261056	0.309306067723799	-2.52303015910415	0.011634842206593	0.761786963068857
ENSMUSG00000037991	Rmi2	20	10	12	13	26	26	18	25	16.946840752502	10.4416760188189	12.5140197151552	12.7931329691443	27.8933502012507	26.565705529548	17.3973962375588	25.160590254891	18.7140889598586	-0.911959899138111	0.361509570584877	-2.52264386157931	0.011647629644207	0.761786963068857
ENSMUSG00000113188	Gm35638	7	16	3	13	19	23	10	22	5.9313942633757	16.7066816301102	3.12850492878879	12.7931329691443	20.3836020701448	23.5004318146001	9.66522013197712	22.1413194243041	14.2812859040556	-1.1982608002299	0.474279623464964	-2.52648593982537	0.011520999993191	0.761786963068857
ENSMUSG00000016427	Ndufa1	1065	1094	843	872	1316	1070	954	1000	902.419270070732	1142.31935645879	879.109884989649	858.12399608414	1411.83264864792	1093.2809583314	922.062000590617	1006.42361019564	1026.94646567111	-0.315121934284902	0.124978408539292	-2.52141100185181	0.011688523897021	0.762716213472034
ENSMUSG00000091825	Gm5778	24	21	18	39	39	48	30	40	20.3362089030024	21.9275196395196	18.7710295727327	38.3793989074329	41.8400253018761	49.0443794391654	28.9956603959314	40.2569444078256	32.4438958209358	-0.76793624711277	0.304858702888248	-2.51899073189415	0.011769175454379	0.76622962109705
ENSMUSG00000026062	Slc9a2	415	287	244	245	184	177	196	210	351.646945614417	299.676101740102	254.451734208155	241.101352110796	197.399093731928	180.851149181923	189.438314586752	211.348958141084	240.739206164394	0.444770623320995	0.176883860642873	2.51447826672543	0.011920864972308	0.772704609400102
ENSMUSG00000066538	Gm6254	33	33	20	31	62	44	39	39	27.9622872416283	34.4575308621023	20.8566995252586	30.5067016956518	66.5149120183671	44.957347819235	37.6943585147108	39.25052079763	37.775044809323	-0.726734101028331	0.289026081877337	-2.51442394509143	0.011922701541074	0.772704609400102
ENSMUSG00000095762	Gm16378	46	49	36	39	66	70	55	55	38.9777337307546	51.1642124922125	37.5420591454655	38.3793989074329	70.8061966647134	71.5230533487829	53.1587107258742	55.3532985607602	52.1130829469995	-0.588483147519159	0.234126819551073	-2.51352300709311	0.011953198102862	0.772928404927341
ENSMUSG00000083914	Rps18-ps1	11	9	8	10	31	18	8	10	9.3207624138761	9.39750841693699	8.34267981010344	9.84087151472637	33.2574560091835	18.391642289687	7.73217610558169	10.0642361019564	13.2934165827564	-1.19875570294103	0.477367931255854	-2.51117769848377	0.012032910888305	0.776326469748631
ENSMUSG00000036246	Gmip	1078	817	827	894	628	748	793	756	913.434716559858	853.084930737502	862.424525369443	879.773913416538	673.731689476363	764.274912926995	766.451956465785	760.856249307904	809.254111782549	0.222188587363411	0.088635827072847	2.50675821167441	0.012184402721705	0.78432976168703
ENSMUSG00000000303	Cdh1	207	137	43	39	35	18	34	20	175.399801788396	143.050961457819	44.841903979306	38.3793989074329	37.5487406555298	18.391642289687	32.8617484487222	20.1284722039128	63.8253337163506	1.77914356102398	0.711802105907504	2.49949184788613	0.012437156056807	0.788542990039271
ENSMUSG00000040562	Gstm2	128	101	56	58	47	30	44	47	108.459780816013	105.460927790071	58.398758670724	57.077054785413	50.4225945945686	30.6527371494784	42.5269685806993	47.3019096791951	62.5375915082702	0.800481912957074	0.321589015981688	2.48914568961104	0.012805048059732	0.788542990039271
ENSMUSG00000018387	Shroom1	314	298	226	267	184	228	261	206	266.065399814281	311.161945360803	235.680704635422	262.751269443194	197.399093731928	232.960802336036	252.262245444603	207.323263700302	245.700590558321	0.320490703483954	0.128592023191033	2.49230625299239	0.012691655196246	0.788542990039271
ENSMUSG00000022820	Ndufb4	1125	1077	1061	1013	1341	1189	1116	1094	953.259792328238	1124.56850722679	1106.44790981497	996.880284441782	1438.65317768758	1214.87014902433	1078.63856672865	1101.02742955403	1126.7932271008	-0.250786984062083	0.100566171066371	-2.49375094430682	0.012640120038031	0.788542990039271
ENSMUSG00000026032	Ndufb3	1987	1634	1874	1760	2329	2057	2025	1852	1683.66862876107	1706.169861475	1954.27274551673	1731.99338659184	2498.60048533511	2101.75601054924	1957.20707672537	1863.89652608233	1937.19559012959	-0.254109216764342	0.10185335623033	-2.49485364222757	0.012600909244347	0.788542990039271
ENSMUSG00000079435	Rpl36a	3150	2415	2700	3039	3649	3153	2925	2776	2669.12741851907	2521.66475854476	2815.65443590991	2990.64085332534	3914.72441862938	3221.60267441018	2827.07688860331	2793.8319419031	2969.29042373063	-0.259488570268035	0.103900400079481	-2.49747421636041	0.01250815609366	0.788542990039271
ENSMUSG00000074754	Smim26	428	341	405	458	516	466	443	448	362.662392103543	356.061152241724	422.348165386486	450.711915374468	553.575719378668	476.139183721898	428.169251846586	450.877777367647	437.568194677628	-0.288723590134048	0.115831130887824	-2.49262515112332	0.01268026346521	0.788542990039271
ENSMUSG00000093565	Rab26os	99	62	94	100	139	112	65	92	83.8868617248849	64.738391316677	98.0264877687154	98.4087151472637	149.122141460533	114.436885358053	62.8239308578513	92.5909721379989	95.5042982214971	-0.539634158483887	0.21697869500363	-2.4870375336844	0.012881180811514	0.788542990039271
ENSMUSG00000114540	Gm6421	60	84	30	49	119	81	76	78	50.840522257506	87.7100785580786	31.2850492878879	48.2202704221592	127.665718228801	82.7623903035917	73.4556730030261	78.50104159526	72.5550929570389	-0.723833284001043	0.290847448103981	-2.48870426307562	0.01282095644792	0.788542990039271
ENSMUSG00000082876	Gm11889	47	72	28	47	98	89	76	66	39.8250757683797	75.1800673354959	29.199379335362	46.252096119214	105.136473835483	90.9364535434526	73.4556730030261	66.4239582729123	65.8011471516658	-0.72998883791882	0.292906973416026	-2.49222075324916	0.012694710971534	0.788542990039271
ENSMUSG00000107470	Gm3375	72	137	51	81	189	109	88	106	61.0086267090072	143.050961457819	53.1845837894094	79.7110592692836	202.763199539861	111.371611643105	85.0539371613986	106.680902680738	105.353110281328	-0.734165079700083	0.294998185248343	-2.48871049522569	0.012820731728386	0.788542990039271
ENSMUSG00000090610	Gm3571	59	102	39	80	144	109	62	72	49.9931802198809	106.505095391953	40.6705640742542	78.726972117811	154.486247268465	111.371611643105	59.9243648182581	72.4624999340861	84.2675669334767	-0.748881556633597	0.299229556481002	-2.50269914991216	0.01232502627966	0.788542990039271
ENSMUSG00000021927	Hnrnpa1l2-ps2	51	54	24	82	114	94	85	77	43.2144439188801	56.3850505016219	25.0280394303103	80.6951464207563	122.301612420869	96.0452430683657	82.1543711218055	77.4946179850643	72.9148156084591	-0.777081137047612	0.3105796245667	-2.50203514841562	0.012348166505298	0.788542990039271
ENSMUSG00000100551	Gm19503	19	41	21	41	65	54	43	46	16.0994987148769	42.8108716771574	21.8995345015215	40.3475732103781	69.7333755031268	55.1749268690611	41.5604465675016	46.2954860689995	41.7402141390779	-0.814756674573579	0.325522090921119	-2.50292283472403	0.012317239594863	0.788542990039271
ENSMUSG00000102659	Gm37077	25	10	31	27	28	49	30	50	21.1835509406275	10.4416760188189	32.3278842641508	26.5703530897612	30.0389925244238	50.0661373441481	28.9956603959314	50.321180509782	31.2431793859555	-0.864903553187694	0.346007159159203	-2.49966953079644	0.012430920565327	0.788542990039271
ENSMUSG00000074479	Rtraf-ps	17	29	16	30	61	27	26	37	14.4048146396267	30.2808604545747	16.6853596202069	29.5226145441791	65.4420908567805	27.5874634345306	25.1295723431405	37.2376735772387	30.7863061837847	-0.906472309450678	0.362482172009933	-2.50073625531531	0.012393543784498	0.788542990039271
ENSMUSG00000078308	Gm47854	15	22	11	20	38	26	12	23	12.7101305643765	22.9716872414015	11.4711847388922	19.6817430294527	40.7672041402895	26.565705529548	11.5982641583725	23.1477430344997	21.1142078046041	-0.945713895699104	0.380270859010527	-2.48694811419384	0.012884418891863	0.788542990039271
ENSMUSG00000057499	Gm6177	20	37	11	28	63	41	24	28	16.946840752502	38.6342012696298	11.4711847388922	27.5544402412338	67.5877331799537	41.8920741042872	23.1965283167451	28.1798610854779	31.9328579610902	-0.963261048640157	0.387002049960253	-2.48903345276618	0.012809091260017	0.788542990039271
ENSMUSG00000063543	Gm5616	18	13	12	21	46	18	15	24	15.2521566772518	13.5741788244645	12.5140197151552	20.6658301809254	49.349773432982	18.391642289687	14.4978301979657	24.1541666446954	21.0499497453909	-0.995554189327337	0.399742495923501	-2.49048875083288	0.012756753403166	0.788542990039271
ENSMUSG00000084086	Gm5761	9	10	10	8	30	14	14	18	7.6260783386259	10.4416760188189	10.4283497626293	7.8726972117811	32.184634847597	14.3046106697566	13.531308184768	18.1156249835215	14.3131225021873	-1.11030176287078	0.446241950790953	-2.48811605655363	0.012842181756584	0.788542990039271
ENSMUSG00000089993	Gm5822	91	222	66	119	352	198	143	254	77.1081254238841	231.805207617779	68.8271084333533	117.106371025244	377.633048878471	202.308065186557	138.212647887273	255.631596989693	183.579021430282	-1.13811234554514	0.456194027108153	-2.49479887485534	0.012602854170945	0.788542990039271
ENSMUSG00000102870	Gm17868	4	6	6	10	17	16	8	13	3.3893681505004	6.26500561129133	6.25700985757758	9.84087151472637	18.2379597469716	16.3481264797218	7.73217610558169	13.0835069325433	10.1442530498643	-1.25462226228762	0.504078202098937	-2.488943693783	0.012812325534732	0.788542990039271
ENSMUSG00000067768	Xlr4b	11	1	14	10	19	39	34	49	9.3207624138761	1.04416760188189	14.599689667681	9.84087151472637	20.3836020701448	39.8485582943219	32.8617484487222	49.3147568995864	22.1517696138676	-1.43124150104413	0.574384373763183	-2.49178349276304	0.012710348919057	0.788542990039271
ENSMUSG00000039899	Fgl2	285	216	133	166	100	103	85	110	241.492480723154	225.540202006488	138.69705184297	163.358467144458	107.282116158657	105.241064213209	82.1543711218055	110.70659712152	146.809043791533	0.661108818543256	0.266295554954092	2.48261304495762	0.013042267799558	0.794378027637497
ENSMUSG00000037885	Stk35	1723	1323	1250	1343	1086	1171	1421	1255	1459.97033082805	1381.43373728974	1303.54372032866	1321.62904442775	1165.08378148301	1196.47850673464	1373.42778075395	1263.06163079553	1308.07856658017	0.179518605092414	0.072371074138243	2.48052978665894	0.01311873024194	0.794378027637497
ENSMUSG00000044211	Gm7887	20	25	18	25	44	44	21	22	16.946840752502	26.1041900470472	18.7710295727327	24.6021787868159	47.2041311098089	44.957347819235	20.2969622771519	22.1413194243041	27.6279999736997	-0.83786696281193	0.337527289660595	-2.48236805875595	0.013051239102127	0.794378027637497
ENSMUSG00000083992	Gm11478	260	386	197	379	771	470	299	363	220.308929782526	403.048694326409	205.438490323797	372.96903040813	827.145115583242	480.226215341828	288.990081946116	365.331770501018	395.432291026633	-0.903202054954536	0.364114610448499	-2.48054329333837	0.013118233228286	0.794378027637497
ENSMUSG00000115568	Tiaf2	8	3	7	6	12	11	5	18	6.7787363010008	3.13250280564566	7.29984483384051	5.90452290883582	12.8738539390388	11.2393369548087	4.83261006598856	18.1156249835215	8.77212909908505	-1.32790799947992	0.535290524334686	-2.48072390433284	0.013111588773466	0.794378027637497
ENSMUSG00000102070	Gm28661	1761	2588	1327	2423	4541	3175	2492	2589	1492.1693282578	2702.30575367033	1383.84201350091	2384.4431680182	4871.6808947646	3244.0813483198	2408.5728568887	2605.63072679651	2636.5907612771	-0.784875705154716	0.316733283384239	-2.47803355797805	0.013210871933925	0.798266238358347
ENSMUSG00000015970	Chdh	239	304	219	223	160	175	226	190	202.514746992399	317.426950972094	228.380859801582	219.451434778398	171.651385853851	178.807633371957	218.433974982683	191.220485937172	215.985934086267	0.391233032257316	0.15804557654921	2.47544436737525	0.013307049173436	0.799362288064457
ENSMUSG00000019577	Pdk4	311	302	283	296	222	235	284	231	263.523373701406	315.33861576833	295.122298282409	291.289796835901	238.166297872218	240.113107670914	274.49225174815	232.483853955193	268.816199479315	0.279690321438948	0.112976449628074	2.47565153941115	0.013299330910262	0.799362288064457
ENSMUSG00000083199	Gm9432	24	28	20	22	52	42	29	26	20.3362089030024	29.2366928526929	20.8566995252586	21.649917332398	55.7867004025014	42.9138320092698	28.0291383827336	26.1670138650867	30.6220254091179	-0.792798885414499	0.320353905283468	-2.47475954667381	0.013332590580789	0.799362288064457
ENSMUSG00000064281	Rpl19-ps1	18	22	6	29	58	30	22	25	15.2521566772518	22.9716872414015	6.25700985757758	28.5385273927065	62.2236273720208	30.6527371494784	21.2634842903497	25.160590254891	26.5399775294597	-1.05830388929105	0.42780680641933	-2.47378927452995	0.013368852513726	0.799362288064457
ENSMUSG00000101413	Gm29485	0	5	2	5	13	9	1	7	0	5.22083800940944	2.08566995252586	4.92043575736319	13.9466751006254	9.19582114484352	0.966522013197712	7.04496527136948	5.42261590616682	-1.95946961391555	0.791931210286203	-2.47429270177066	0.013350027086076	0.799362288064457
ENSMUSG00000025922	Rpl7-ps8	15	12	11	15	51	22	21	15	12.7101305643765	12.5300112225827	11.4711847388922	14.7613072720896	54.7138792409149	22.4786739096175	20.2969622771519	15.0963541529346	20.50731292232	-1.09419810591885	0.44248146962219	-2.47286763636255	0.013403377548537	0.799753515062102
ENSMUSG00000028641	P3h1	541	403	398	413	324	343	372	331	458.412042355179	420.799543558401	415.048320552646	406.427993558199	347.594056354047	350.462961409036	359.546188909549	333.126214974757	386.427165208977	0.262538470020748	0.106254930771316	2.47083564136698	0.013479775631986	0.800959023541457
ENSMUSG00000071303	Rps8-ps1	39	32	16	53	86	43	37	48	33.0463394673789	33.4133632602204	16.6853596202069	52.1566190280498	92.2626198964447	43.9355899142524	35.7613144883153	48.3083332893907	44.4461923705324	-0.841843801224006	0.340842970841387	-2.46988752370593	0.013515554028926	0.800959023541457
ENSMUSG00000063816	Gm4987	8	8	5	10	24	21	13	11	6.7787363010008	8.3533408150551	5.21417488131465	9.84087151472637	25.7477078780776	21.4569160046349	12.5647861715703	11.070659712152	12.6283991598165	-1.18049422268956	0.478057677585168	-2.46935522226656	0.013535677840892	0.800959023541457
ENSMUSG00000106350	Gm4869	4	1	2	2	4	5	1	15	3.3893681505004	1.04416760188189	2.08566995252586	1.96817430294527	4.29128464634626	5.10878952491307	0.966522013197712	15.0963541529346	4.24379129315563	-2.09335132696284	0.847413735468137	-2.47028250705237	0.013500638657924	0.800959023541457
ENSMUSG00000068323	Slc4a5	12	517	2	8	1	8	9	8	10.1681044515012	539.834650172936	2.08566995252586	7.8726972117811	1.07282116158657	8.17406323986091	8.69869811877941	8.05138888156512	73.244761648817	4.30018406579664	1.75161670722389	2.45498004675459	0.014089240847485	0.802160543151318
ENSMUSG00000006154	Eps8l1	504	392	584	455	110	386	643	264	427.06038696305	409.3136999377	609.015626137551	447.75965392005	118.010327774522	394.398551323289	621.473654486129	265.695833091649	411.590966704242	0.954881867228038	0.38838946571693	2.45856788485604	0.013949240166229	0.802160543151318
ENSMUSG00000074825	Itpripl1	86	119	63	52	40	46	59	46	72.8714152357586	124.255944623945	65.6986035045646	51.1725318765771	42.9128464634626	47.0008636292002	57.024798778665	46.2954860689995	63.4040612726465	0.706029220628468	0.28736106325092	2.45694114798	0.014012564010337	0.802160543151318
ENSMUSG00000046618	Olfml2a	264	212	108	148	113	102	124	106	223.698297933026	221.36353159896	112.626177436396	145.64489841795	121.228791259282	104.219306308227	119.848729636516	106.680902680738	144.413829408887	0.574569013249903	0.233294790455966	2.462845450286	0.013783931711488	0.802160543151318
ENSMUSG00000030796	Tead2	103	113	71	91	55	63	75	60	87.2762298753853	117.990939012653	74.041283314668	89.55193078401	59.0051638872611	64.3707480139046	72.4891509898284	60.3854166117384	78.1388578111812	0.52549144390544	0.213412280755328	2.46232991862312	0.01380376255294	0.802160543151318
ENSMUSG00000074364	Ehd2	431	307	231	272	203	228	271	229	365.204418216418	320.55945377774	240.894879516737	267.671705200557	217.782695802073	232.960802336036	261.92746557658	230.471006734802	267.184053395118	0.360871335802811	0.146969858779389	2.45541050933784	0.014072378601374	0.802160543151318
ENSMUSG00000022197	Pdzd2	1047	897	745	939	489	786	882	774	887.16711339348	936.618338888053	776.912057315882	924.057835232806	524.609548015831	803.101713316334	852.472415640382	778.971874291426	810.488862011774	0.317505026151214	0.129120269253064	2.45898671051353	0.013932977525037	0.802160543151318
ENSMUSG00000032511	Scn5a	1443	1130	1206	1269	843	930	1071	1141	1222.71456029302	1179.90939012653	1257.65898137309	1248.80659521878	904.388239217475	950.234851633831	1035.14507613475	1148.32933923323	1118.39837915384	0.247735748934937	0.10071419998725	2.45978967182682	0.013901846024654	0.802160543151318
ENSMUSG00000038244	Mical2	3299	2400	2553	2785	1901	2340	2763	2525	2795.38138212521	2506.00224451653	2662.35769439926	2740.68271685129	2039.43302817606	2390.91349765932	2670.50032246528	2541.21961574399	2543.31131274212	0.202933824567828	0.082401312024174	2.46274991966503	0.013787604566401	0.802160543151318
ENSMUSG00000021290	Atp5mpl	1653	1396	1656	1564	1951	1740	1662	1616	1400.65638819429	1457.65797222712	1726.93472069141	1539.1123049032	2093.07408625539	1777.85875466975	1606.3595859346	1626.38055407616	1653.50429586899	-0.245151477986166	0.099631706317574	-2.46057692924328	0.013871383015822	0.802160543151318
ENSMUSG00000042043	Tbca	2042	1790	1994	1993	2606	2099	1942	1945	1730.27244083045	1869.06000736858	2079.41294266828	1961.28569288497	2795.77194709459	2144.66984255851	1876.98574962996	1957.49392183052	2051.86906810823	-0.272602297268007	0.110875837399096	-2.4586267275419	0.013946954343919	0.802160543151318
ENSMUSG00000093674	Rpl41	7368	6881	5782	6129	9934	6647	6551	6553	6243.21613322174	7184.91726854927	6029.67183275226	6031.47015137579	10657.4054192009	6791.62479441943	6331.68570845821	6595.09391761203	6983.13565319871	-0.332621726861594	0.13540946799176	-2.45641410305101	0.014033134592955	0.802160543151318
ENSMUSG00000083261	Gm7816	77	92	59	72	138	109	109	92	65.2453368971327	96.0634193731337	61.5272635995128	70.8542749060299	148.049320298946	111.371611643105	105.350899438551	92.5909721379989	93.8816372868012	-0.555957340222927	0.226304210876785	-2.4566813762278	0.014022699582597	0.802160543151318
ENSMUSG00000084067	Gm14269	20	23	17	26	46	31	24	30	16.946840752502	24.0158548432834	17.7281945964698	25.5862659382886	49.349773432982	31.674495054461	23.1965283167451	30.1927083058692	27.3363326550751	-0.786774364422412	0.320433826148035	-2.45534116631911	0.014075093728757	0.802160543151318
ENSMUSG00000082283	Gm14472	28	23	12	34	46	47	32	33	23.7255770535028	24.0158548432834	12.5140197151552	33.4589631500697	49.349773432982	48.0226215341828	30.9287044223268	33.2119791364561	31.9034366609949	-0.799765042600641	0.324371448350942	-2.46558396759805	0.013679010983613	0.802160543151318
ENSMUSG00000081394	Gm13215	34	53	16	54	128	53	33	36	28.8096292792534	55.34088289974	16.6853596202069	53.1407061795224	137.32110868308	54.1531689640785	31.8952264355245	36.2312499670431	51.6971665035562	-1.02922826287963	0.417141153897563	-2.46733810189434	0.013612176109167	0.802160543151318
ENSMUSG00000113151	Gm48690	13	30	9	36	72	30	20	30	11.0154464891263	31.3250280564566	9.38551478636636	35.4271374530149	77.2431236342327	30.6527371494784	19.3304402639542	30.1927083058692	30.5715170173124	-1.11399753539139	0.453243098806746	-2.45783672895234	0.013977670486203	0.802160543151318
ENSMUSG00000081731	Calr-ps	3	3	0	1	8	8	4	8	2.5420261128753	3.13250280564566	0	0.984087151472637	8.58256929269253	8.17406323986091	3.86608805279085	8.05138888156512	4.41659069211288	-1.9610101591671	0.797973483269701	-2.45748787432366	0.013991253390665	0.802160543151318
ENSMUSG00000110715	Gm5131	0	2	1	0	8	3	1	5	0	2.08833520376378	1.04283497626293	0	8.58256929269253	3.06527371494784	0.966522013197712	5.0321180509782	2.59720665648037	-2.80963248070489	1.13907393396372	-2.46659360462057	0.013640507139851	0.802160543151318
ENSMUSG00000062312	Erbb2	189	149	109	126	90	91	99	90	160.147645111144	155.580972680401	113.669012412659	123.994981085552	96.5539045427909	92.9799693534178	95.6856793065735	90.5781249176076	116.148786176268	0.477394180301977	0.1946104688074	2.45307553713587	0.014164059187402	0.804817048976409
ENSMUSG00000066491	Cox6c2	16	29	17	24	48	38	24	26	13.5574726020016	30.2808604545747	17.7281945964698	23.6180916353433	51.4954157561552	38.8268003893393	23.1965283167451	26.1670138650867	28.1087972019645	-0.845738050547715	0.345028286787045	-2.45121366257635	0.014237541291068	0.805995472896627
ENSMUSG00000081277	Gm15285	0	8	5	3	21	12	5	7	0	8.3533408150551	5.21417488131465	2.95226145441791	22.5292443933179	12.2610948597914	4.83261006598856	7.04496527136948	7.89846146765687	-1.73045106304864	0.705983474853865	-2.45112120139475	0.014241199181722	0.805995472896627
ENSMUSG00000024529	Lox	45	35	16	31	6	20	16	11	38.1303916931295	36.5458660658661	16.6853596202069	30.5067016956518	6.4369269695194	20.4351580996523	15.4643522111634	11.070659712152	21.9094270084177	1.11788644384516	0.456576665871565	2.44840905680366	0.014348864827145	0.807996770500065
ENSMUSG00000030583	Sipa1l3	2264	1990	1766	1826	1378	1633	1985	1804	1918.38237318323	2077.89352774496	1841.64656808033	1796.94313858904	1478.34756066629	1668.53065883661	1918.54619619746	1815.58819279294	1814.48477701136	0.207627007063122	0.084887914354339	2.44589596342827	0.014449268817397	0.807996770500065
ENSMUSG00000114251	Tmed10-ps	56	54	37	68	80	76	54	66	47.4511541070056	56.3850505016219	38.5848941217284	66.9179263001393	85.8256929269253	77.6536007786786	52.1921887126764	66.4239582729123	61.429308215211	-0.550169515126306	0.224888496990032	-2.44641020990367	0.014428673187441	0.807996770500065
ENSMUSG00000068396	Rpl34-ps1	67	85	45	55	138	74	60	69	56.7719165208817	88.7542461599605	46.9275739318318	54.124793330995	148.049320298946	75.6100849687134	57.9913207918627	69.4432291034992	74.7090606383363	-0.680930592931251	0.27852990555636	-2.44473063519373	0.014496036313593	0.807996770500065
ENSMUSG00000108799	Glud-ps	26	47	27	68	97	61	60	68	22.0308929782526	49.0758772884487	28.1565443590991	66.9179263001393	104.063652673897	62.3272322039394	57.9913207918627	68.4368054933036	57.3750315111178	-0.805895627705056	0.329278535035225	-2.44745873768797	0.014386759725387	0.807996770500065
ENSMUSG00000048538	Gm9826	17	23	11	21	29	31	17	30	14.4048146396267	24.0158548432834	11.4711847388922	20.6658301809254	31.1118136860104	31.674495054461	16.4308742243611	30.1927083058692	22.4959469591787	-0.836929654478392	0.342363529877058	-2.44456427581212	0.014502723601922	0.807996770500065
ENSMUSG00000084390	Gm15425	13	6	13	17	26	30	23	24	11.0154464891263	6.26500561129133	13.5568546914181	16.7294815750348	27.8933502012507	30.6527371494784	22.2300063035474	24.1541666446954	19.0621310832303	-0.979651600113811	0.400198345507436	-2.44791516784421	0.014368548126889	0.807996770500065
ENSMUSG00000113132	Gm9231	10	20	8	12	33	21	9	17	8.473420376251	20.8833520376378	8.34267981010344	11.8090458176716	35.4030983323567	21.4569160046349	8.69869811877941	17.1092013733259	16.5220514838451	-1.08846050770774	0.444909428082694	-2.44647660625756	0.014426015893957	0.807996770500065
ENSMUSG00000017493	Igfbp4	796	673	450	458	446	340	388	328	674.48426194958	702.72479606651	469.275739318318	450.711915374468	478.478238067608	347.397687694089	375.010541120712	330.10694414417	478.523765466932	0.472789257346949	0.193566205725349	2.44251963081712	0.014585136366205	0.808079597254271
ENSMUSG00000063314	Gm12657	20	34	10	24	54	39	33	34	16.946840752502	35.5016984639842	10.4283497626293	23.6180916353433	57.9323427256746	39.8485582943219	31.8952264355245	34.2184027466518	31.2986888520789	-0.894992034060918	0.366645755454142	-2.44102657878132	0.014645576829982	0.808079597254271
ENSMUSG00000081929	Rps11-ps2	16	27	15	27	59	40	32	25	13.5574726020016	28.192525250811	15.6425246439439	26.5703530897612	63.2964485336074	40.8703161993045	30.9287044223268	25.160590254891	30.5273668745809	-0.90921633057858	0.372376616259523	-2.44165796368082	0.014619990752709	0.808079597254271
ENSMUSG00000059033	Rpl18a-ps1	9	22	2	7	36	20	12	18	7.6260783386259	22.9716872414015	2.08566995252586	6.88861006030846	38.6215618171164	20.4351580996523	11.5982641583725	18.1156249835215	16.0428318314406	-1.33319891482425	0.545554727192108	-2.44374917560706	0.014535528203311	0.808079597254271
ENSMUSG00000106354	Gm42607	5	1	7	5	14	13	8	12	4.2367101881255	1.04416760188189	7.29984483384051	4.92043575736319	15.0194962622119	13.282852764774	7.73217610558169	12.0770833223477	8.20159585451579	-1.41323608608485	0.578933721416962	-2.44110169058022	0.014642530951835	0.808079597254271
ENSMUSG00000034684	Sema3f	763	756	617	702	495	605	675	581	646.521974707951	789.390707022707	643.429180354227	690.829180333791	531.04647498535	618.163532514481	652.402358908455	584.732117523667	644.564440793829	0.242985760508446	0.099915747446672	2.43190654844608	0.015019581957142	0.8161115435686
ENSMUSG00000039294	Cybc1	1062	824	871	861	703	780	851	725	899.877243957856	860.394103950675	908.309264325012	847.299037417941	754.193276595356	796.971165886438	822.510233231253	729.657117391839	827.401430344546	0.190793612023632	0.078360325705299	2.4348241320637	0.014899029139485	0.8161115435686
ENSMUSG00000046613	Vwa5b2	3982	2964	3001	3100	2437	2827	2992	2746	3374.11599382315	3094.91277197791	3129.54776376505	3050.67016956518	2614.46517078646	2888.50959738585	2891.83386348755	2763.63923359723	2975.96182054855	0.173864758078036	0.071475104127571	2.43252192774309	0.014994083587979	0.8161115435686
ENSMUSG00000082107	Gm16216	57	79	21	79	112	91	79	97	48.2984961446307	82.4892405486691	21.8995345015215	77.7428849663383	120.155970097695	92.9799693534178	76.3552390426192	97.6230901889771	77.1930531054837	-0.755483006763997	0.310500423581516	-2.43311425488494	0.014969576414414	0.8161115435686
ENSMUSG00000107020	Gm6051	30	60	23	51	81	70	53	57	25.420261128753	62.6500561129133	23.9852044540474	50.1884447251045	86.8985140885118	71.5230533487829	51.2256666994787	57.3661457811515	53.6571682923429	-0.755564498390634	0.310414199206801	-2.4340526313594	0.014930823891241	0.8161115435686
ENSMUSG00000041247	Lamp3	12	22	8	25	36	31	18	26	10.1681044515012	22.9716872414015	8.34267981010344	24.6021787868159	38.6215618171164	31.674495054461	17.3973962375588	26.1670138650867	22.4931396580056	-0.949445376832623	0.390200906910901	-2.43322186088466	0.014965128071462	0.8161115435686
ENSMUSG00000101597	Gm5621	136	199	72	140	395	215	134	168	115.238517117014	207.789352774496	75.0841182909309	137.772201206169	423.764358826694	219.677949571262	129.513949768493	169.079166512868	184.739951758491	-1.02512790691974	0.420795475310999	-2.43616665830852	0.014843843736307	0.8161115435686
ENSMUSG00000103823	Gm7899	5	29	10	31	63	32	21	30	4.2367101881255	30.2808604545747	10.4283497626293	30.5067016956518	67.5877331799537	32.6962529594436	20.2969622771519	30.1927083058692	28.278284852925	-1.18925605749823	0.488543106819603	-2.43429093747784	0.014920996548462	0.8161115435686
ENSMUSG00000039629	Strip2	839	956	718	764	523	702	711	592	710.919969567459	998.224227399085	748.755512956783	751.842583725095	561.085467509774	717.274049297795	687.197151383573	595.802777235819	721.387717384423	0.318210066290159	0.13095692506511	2.42988346077879	0.015103678410499	0.819123781120455
ENSMUSG00000110744	Gm5171	21	25	13	30	45	33	27	35	17.7941827901271	26.1041900470472	13.5568546914181	29.5226145441791	48.2769522713955	33.7180108644262	26.0960943563382	35.2248263568474	28.7867157402224	-0.788761928635046	0.324769029881287	-2.42868579224861	0.015153658718926	0.820277878495495
ENSMUSG00000073616	Cops9	1668	1406	1418	1368	2008	1709	1574	1380	1413.36651875867	1468.09964824593	1478.73999634083	1346.23122321457	2154.22489246582	1746.18425961529	1521.3056487732	1388.86458206998	1564.62709618554	-0.286242104941214	0.117969193726985	-2.42641401452366	0.015248863329932	0.822316533646757
ENSMUSG00000103924	Gm37895	9	4	7	14	21	28	18	16	7.6260783386259	4.17667040752755	7.29984483384051	13.7772201206169	22.5292443933179	28.6092213395132	17.3973962375588	16.1027777631302	14.6898066792664	-1.15250587123937	0.474921848423391	-2.42672741855395	0.01523569810161	0.822316533646757
ENSMUSG00000081087	Rps15a-ps7	12	16	8	18	31	20	12	22	10.1681044515012	16.7066816301102	8.34267981010344	17.7135687265075	33.2574560091835	20.4351580996523	11.5982641583725	22.1413194243041	17.5454040387168	-0.97124089767394	0.40040252998207	-2.42566124074549	0.015280526185102	0.822472163646693
ENSMUSG00000021103	Mnat1	561	442	534	501	576	561	481	539	475.358883107681	461.522080031794	556.873877324404	493.027662887791	617.944989073862	573.206184695246	464.897088348099	542.46232589545	523.161636420541	-0.237186664119849	0.09782166778281	-2.42468432092639	0.015321703270139	0.82313834805235
ENSMUSG00000020620	Abca8b	1263	974	1015	1108	780	951	983	890	1070.1929935205	1017.01924423296	1058.47750090687	1090.36856383168	836.800506037521	971.691767638465	950.091138973351	895.71701307412	986.294841026934	0.202326295265876	0.083568202360612	2.42109186928301	0.015473966083502	0.825636769348236
ENSMUSG00000018574	Acadvl	1883	1557	1546	1553	1196	1375	1475	1415	1595.54505684806	1625.7689561301	1612.22287330249	1528.28734623701	1283.09410925753	1404.91711935109	1425.61996946662	1424.08940842683	1487.44310487747	0.183952224981623	0.076021377915728	2.41974336726097	0.015531463955254	0.825636769348236
ENSMUSG00000035007	Rundc1	1727	1327	1382	1486	1103	1222	1428	1347	1463.35969897855	1385.61040769726	1441.19793719537	1462.35350708834	1183.32174122998	1248.58815988875	1380.19343484633	1355.65260293353	1365.03468623226	0.176052051290665	0.072668135856658	2.4226856684192	0.015406250766876	0.825636769348236
ENSMUSG00000089417	Gm22009	105	37	88	123	138	150	129	135	88.9709139506355	38.6342012696298	91.7694779111378	121.042719631134	148.049320298946	153.263685747392	124.681339702505	135.867187376411	112.784855735974	-0.645908334070694	0.267033131867081	-2.4188321859334	0.015570421562531	0.825636769348236
ENSMUSG00000099471	Gm8451	138	175	92	260	408	299	203	221	116.933201192264	182.72933032933	95.9408178161895	255.862659382886	437.711033927319	305.505613589801	196.203968679135	222.419617853237	226.66328034627	-0.924923276688601	0.381959616998538	-2.42152111251107	0.015455703216977	0.825636769348236
ENSMUSG00000059658	Gm16379	20	27	14	10	49	23	18	26	16.946840752502	28.192525250811	14.599689667681	9.84087151472637	52.5682369177417	23.5004318146001	17.3973962375588	26.1670138650867	23.6516257525885	-0.970073530090828	0.400955702384158	-2.41940325158762	0.015545995574986	0.825636769348236
ENSMUSG00000068674	Gm10247	12	23	13	22	55	33	25	19	10.1681044515012	24.0158548432834	13.5568546914181	21.649917332398	59.0051638872611	33.7180108644262	24.1630503299428	19.1220485937172	25.6748756242435	-0.996846383621466	0.411902743060974	-2.42010134774437	0.015516181964895	0.825636769348236
ENSMUSG00000074743	Thbd	650	512	351	303	230	206	217	199	550.772324456315	534.613812163527	366.035076668288	298.178406896209	246.74886716491	210.482128426418	209.735276863903	200.278298428932	327.105523883563	0.838672706117417	0.347028857740117	2.41672324191979	0.015660919552672	0.827826821329208
ENSMUSG00000036644	Tbc1d9b	7137	5826	5479	5944	4775	5324	5847	5381	6047.48012253034	6083.32044856388	5713.69283494459	5849.41402835336	5122.72104657585	5439.83908612743	5651.25421116702	5415.56544646274	5665.41090309065	0.14004068598699	0.057951379401159	2.41652032158857	0.015669651528607	0.827826821329208
ENSMUSG00000111108	Gm17795	16	21	10	23	35	28	18	27	13.5574726020016	21.9275196395196	10.4283497626293	22.6340044838707	37.5487406555298	28.6092213395132	17.3973962375588	27.1734374752823	22.4095177744882	-0.857228506535574	0.35497886383021	-2.41487196529423	0.015740741704288	0.828026004504021
ENSMUSG00000098973	Mir6236	43	99	28	38	173	125	69	75	36.4357076178793	103.372592586307	29.199379335362	37.3953117559602	185.598060954476	127.719738122827	66.6900189106421	75.481770764673	82.7365725060158	-1.24761680705988	0.516604882684516	-2.41503100121062	0.015733870472532	0.828026004504021
ENSMUSG00000112741	Gm47341	3	1	4	3	3	9	5	20	2.5420261128753	1.04416760188189	4.17133990505172	2.95226145441791	3.2184634847597	9.19582114484352	4.83261006598856	20.1284722039128	6.01064524671643	-1.80786020003665	0.748776558451109	-2.414418800418	0.015760335413393	0.828026004504021
ENSMUSG00000029406	Pitpnm2	4120	3733	3302	3624	2486	3005	3809	3532	3491.04919501541	3897.87765782509	3443.44109162019	3566.33183693684	2667.0334077042	3070.38250447275	3681.48234827008	3554.688191211	3421.53577913195	0.223112757748429	0.092463057856345	2.41299350163248	0.015822101664017	0.8282261678741
ENSMUSG00000083219	Gm11410	33	38	18	51	56	78	62	60	27.9622872416283	39.6783688715117	18.7710295727327	50.1884447251045	60.0779850488477	79.6971165886439	59.9243648182581	60.3854166117384	49.5856266848082	-0.763866270126079	0.316558653239437	-2.41303234743139	0.015820415438017	0.8282261678741
ENSMUSG00000054999	Naaladl1	56	52	42	50	34	24	41	29	47.4511541070056	54.2967152978582	43.799069003043	49.2043575736319	36.4759194939432	24.5221897195827	39.6274025411062	29.1862846956736	40.5703865539805	0.64280951900059	0.266712919833323	2.41011766285001	0.015947376474095	0.829970705045847
ENSMUSG00000041949	Tango6	330	307	247	324	195	225	309	272	279.622872416283	320.55945377774	257.580239136944	318.844237077134	209.20012650938	229.895528621088	298.655302078093	273.747221973214	273.513122698735	0.310906404792438	0.128931221600589	2.41141285200556	0.015890849019057	0.829970705045847
ENSMUSG00000038537	Mc3r	357	219	274	270	203	210	272	223	302.501107432161	228.672704812133	285.736783496043	265.703530897612	217.782695802073	214.569160046349	262.893987589778	224.432465073628	250.286554393722	0.299406377514371	0.124359957662684	2.40757863818582	0.016058703330547	0.829970705045847
ENSMUSG00000038690	Atp5j2	3449	3059	3199	3177	4194	3344	3125	3202	2922.48268776897	3194.10869415669	3336.02908906511	3126.44488022857	4499.41195169406	3416.75843426186	3020.38129124285	3222.56839984644	3342.27317853307	-0.251025495986856	0.104227161034662	-2.4084460662166	0.016020593220581	0.829970705045847
ENSMUSG00000101262	Gm8326	67	108	32	79	134	133	100	92	56.7719165208817	112.770101003244	33.3707192404137	77.7428849663383	143.7580356526	135.893801362688	96.6522013197712	92.5909721379989	93.6938290254919	-0.718100419851129	0.298208729763688	-2.40804627155007	0.016038148152931	0.829970705045847
ENSMUSG00000072460	Atp5l-ps1	34	38	17	37	67	47	36	38	28.8096292792534	39.6783688715117	17.7281945964698	36.4112246044876	71.8790178262999	48.0226215341828	34.7947924751176	38.2440971874343	39.4459932968447	-0.741066457204237	0.307585689175022	-2.40930083318199	0.015983117172094	0.829970705045847
ENSMUSG00000107035	Ybx1-ps2	15	14	12	21	30	24	15	25	12.7101305643765	14.6183464263464	12.5140197151552	20.6658301809254	32.184634847597	24.5221897195827	14.4978301979657	25.160590254891	19.609196488355	-0.863260610335434	0.35824680825143	-2.40968123218999	0.015966463913961	0.829970705045847
ENSMUSG00000028003	Lrat	45	15	40	36	16	19	42	20	38.1303916931295	15.6625140282283	41.7133990505172	35.4271374530149	17.1651385853851	19.4134001946697	40.5939245543039	20.1284722039128	28.5292972203952	0.861976908521978	0.358822213439568	2.40223953879363	0.01629503418093	0.837175670139967
ENSMUSG00000012819	Cdh23	259	310	268	287	169	229	200	161	219.461587744901	323.691956583385	279.479773638465	282.433012472647	181.30677630813	233.982560241018	193.304402639542	162.034201241498	234.461783858698	0.430443199711402	0.17918111315457	2.40227997322509	0.016293232960655	0.837175670139967
ENSMUSG00000026879	Gsn	2976	2220	1917	1953	1664	1532	1438	1356	2521.6899039723	2318.05207617779	1999.11464949604	1921.92220682606	1785.17441288005	1565.33311043336	1389.85865497831	1364.71041542529	1858.23192877365	0.369470217056436	0.153985665168521	2.39938059592813	0.016422835004743	0.837175670139967
ENSMUSG00000027737	Slc7a11	2418	2188	2053	2231	1487	1671	2323	2202	2048.87304697749	2284.63871291757	2140.94020626779	2195.49843493545	1595.28506727922	1707.35745922595	2245.23063665828	2216.1447896508	2054.24604423907	0.246539953506828	0.102571570266951	2.40358954109006	0.016234990552455	0.837175670139967
ENSMUSG00000039834	Zfp335	1098	882	827	881	631	794	957	834	930.38155731236	920.955824859825	862.424525369443	866.980780447393	676.950152961123	811.275776556195	924.96156663021	839.357290903164	854.160934379964	0.215580618430249	0.089805900560167	2.40051730549505	0.016371916600044	0.837175670139967
ENSMUSG00000003546	Klc4	1583	1399	1243	1257	1025	1182	1275	1122	1341.34244556053	1460.79047503276	1296.24387549482	1236.99754940111	1099.64169062623	1207.71784368945	1232.31556682708	1129.20729063951	1250.53209215894	0.197179949124918	0.082253826518844	2.39721308381618	0.016520313423566	0.837175670139967
ENSMUSG00000067847	Romo1	1201	1147	959	983	1539	1171	1102	1054	1017.65778718775	1197.66023935853	1000.07874223615	967.357669897602	1651.07176768173	1196.47850673464	1065.10725854388	1060.77048514621	1144.52280709831	-0.311555554508906	0.129834761937846	-2.39963126868945	0.016411594287558	0.837175670139967
ENSMUSG00000112605	Gm7476	19	28	3	17	51	28	24	30	16.0994987148769	29.2366928526929	3.12850492878879	16.7294815750348	54.7138792409149	28.6092213395132	23.1965283167451	30.1927083058692	25.2383144093045	-1.09590482479588	0.45701516720719	-2.39796160703578	0.016486593177056	0.837175670139967
ENSMUSG00000075596	NA	5	3	4	9	23	13	9	8	4.2367101881255	3.13250280564566	4.17133990505172	8.85678436325374	24.674886716491	13.282852764774	8.69869811877941	8.05138888156512	9.38814546796077	-1.39189483639586	0.580257238038586	-2.39875480244039	0.016450926482206	0.837175670139967
ENSMUSG00000102270	Gm8388	2	6	1	5	9	12	3	9	1.6946840752502	6.26500561129133	1.04283497626293	4.92043575736319	9.65539045427909	12.2610948597914	2.89956603959314	9.05781249176076	5.974603033199	-1.63172000322236	0.680526900313656	-2.39773035051266	0.0164970046001	0.837175670139967
ENSMUSG00000114482	Gm7604	2	4	2	1	10	5	2	8	1.6946840752502	4.17667040752755	2.08566995252586	0.984087151472637	10.7282116158657	5.10878952491307	1.93304402639542	8.05138888156512	4.34531820443944	-1.88503894686817	0.785764113727936	-2.39898834005652	0.016440438192051	0.837175670139967
ENSMUSG00000071040	Gm9386	12	12	7	19	38	31	21	14	10.1681044515012	12.5300112225827	7.29984483384051	18.6976558779801	40.7672041402895	31.674495054461	20.2969622771519	14.089930542739	19.4405260500682	-1.06048894301213	0.442802089743449	-2.39495017655981	0.016622623864728	0.840869402969514
ENSMUSG00000109059	Gm9354	15	17	4	24	41	25	12	20	12.7101305643765	17.7508492319921	4.17133990505172	23.6180916353433	43.9856676250492	25.5439476245653	11.5982641583725	20.1284722039128	19.9383453685829	-1.09365547552648	0.456814440878236	-2.39409129322598	0.016661601074653	0.841351979354521
ENSMUSG00000056724	Nbeal2	1913	1605	1406	1643	1044	1286	1582	1555	1620.96531797682	1675.88900102043	1466.22597662568	1616.85518986954	1120.02529269637	1313.98066580764	1529.03782487878	1564.98871385422	1488.49599784119	0.246550535736266	0.103067439040134	2.39212828059365	0.016750986515038	0.843397779032078
ENSMUSG00000031565	Fgfr1	4888	3946	3900	4080	3145	3360	3578	3628	4141.80787991149	4120.28535702593	4067.05640742542	4015.07557800836	3374.02255318975	3433.10656074158	3458.21576322141	3651.30485778978	3782.60936966422	0.183985828427831	0.076920173978791	2.39190603597129	0.016761132867647	0.843397779032078
ENSMUSG00000102459	Gm38352	0	5	2	2	0	0	6	0	0	5.22083800940944	2.08566995252586	1.96817430294527	0	0	5.79913207918627	0	1.88422679300836	3.97747704958426	1.66340414928198	2.39116696402445	0.016794913262916	0.843612330346922
ENSMUSG00000046743	Fat4	680	541	356	457	363	400	462	338	576.192585585068	564.894672618101	371.249251549603	449.727828222995	389.434081655923	408.703161993045	446.533170097343	340.171180246126	443.363241496026	0.34547410467797	0.144567124717778	2.38971415771323	0.016861490209912	0.843779161795153
ENSMUSG00000090665	Gad1-ps	12	12	3	13	19	23	13	20	10.1681044515012	12.5300112225827	3.12850492878879	12.7931329691443	20.3836020701448	23.5004318146001	12.5647861715703	20.1284722039128	14.3996307290306	-1.05578524930423	0.44190588323739	-2.38916314390198	0.016886801740556	0.843779161795153
ENSMUSG00000112900	Gm48204	1	1	2	2	5	8	1	5	0.8473420376251	1.04416760188189	2.08566995252586	1.96817430294527	5.36410580793283	8.17406323986091	0.966522013197712	5.0321180509782	3.18527037586847	-2.17836592497986	0.911714474682929	-2.38930716301004	0.016880182819807	0.843779161795153
ENSMUSG00000029373	Pf4	32	16	22	14	7	10	13	8	27.1149452040032	16.7066816301102	22.9423694777844	13.7772201206169	7.50974813110596	10.2175790498261	12.5647861715703	8.05138888156512	14.8605898333228	1.1195244086645	0.469744498584337	2.38326241613982	0.017159957099397	0.846702532990197
ENSMUSG00000020467	Efemp1	490	319	271	300	239	171	178	195	415.197598436299	333.089465000322	282.608278567254	295.226145441791	256.404257619189	174.720601752027	172.040918349193	196.25260398815	265.692483644278	0.520451739060024	0.218539337286753	2.38150140620735	0.017242224935208	0.846702532990197
ENSMUSG00000030930	Chst15	422	338	299	282	208	235	278	284	357.578339877792	352.928649436078	311.807657902616	277.512576715284	223.146801610006	240.113107670914	268.693119668964	285.824305295562	289.700569772152	0.328959152231683	0.138270413190687	2.37910008830319	0.017354962979682	0.846702532990197
ENSMUSG00000052133	Sema5b	678	575	445	472	413	444	555	417	574.497901509818	600.396371082085	464.061564437004	464.489135495085	443.075139735252	453.66050981228	536.41971732473	419.678645451582	494.53487310598	0.267564363550954	0.11218603910872	2.38500588555102	0.017078848114937	0.846702532990197
ENSMUSG00000028454	Pigo	1168	981	893	956	780	823	988	884	989.695499946117	1024.32841744613	931.251633802796	940.787316807841	836.800506037521	840.906755800691	954.923749039339	889.678471412946	926.046543786673	0.177944643577516	0.074791854142534	2.37919818431561	0.017350344894943	0.846702532990197
ENSMUSG00000069835	Sat2	428	328	323	341	420	398	376	376	362.662392103543	342.486973417259	336.835697332926	335.573718652169	450.584887866358	406.65964618308	363.41227696234	378.415277433561	372.078858743905	-0.240746722684928	0.101187142782751	-2.37922245914001	0.017349202270739	0.846702532990197
ENSMUSG00000074578	Zfas1	1390	1240	1287	1356	1764	1383	1322	1319	1177.80543229889	1294.76782633354	1342.12861445039	1334.4221773969	1892.4565290387	1413.09118259095	1277.74210144738	1327.47274184805	1382.4858256756	-0.264714444455982	0.111196655103342	-2.38059718801764	0.017284600912161	0.846702532990197
ENSMUSG00000082321	Gm14253	36	30	26	32	56	34	35	50	30.5043133545036	31.3250280564566	27.1137093828362	31.4907888471244	60.0779850488477	34.7397687694089	33.8282704619199	50.321180509782	37.4251305538599	-0.646393932691205	0.271653119659361	-2.37948282538316	0.017336950892625	0.846702532990197
ENSMUSG00000096160	Gm3436	38	41	22	32	71	45	47	47	32.1989974297538	42.8108716771574	22.9423694777844	31.4907888471244	76.1703024726462	45.9791057242176	45.4265346202925	47.3019096791951	43.0401099910214	-0.689105268685129	0.289227681410978	-2.38257024819815	0.017192251447517	0.846702532990197
ENSMUSG00000071141	Rpl36a-ps3	67	111	58	117	214	124	107	88	56.7719165208817	115.90260380889	60.4844286232499	115.138196722299	229.583728579525	126.697980217844	103.417855412155	88.5652776972164	112.070248447758	-0.715258714682811	0.300735669959268	-2.37836341388997	0.017389677998154	0.846702532990197
ENSMUSG00000099980	Gm5619	32	39	12	44	72	54	46	45	27.1149452040032	40.7225364733936	12.5140197151552	43.299834664796	77.2431236342327	55.1749268690611	44.4600126070947	45.2890624588038	43.2273077033176	-0.815365346416653	0.342815841160314	-2.37843544118884	0.017386281102648	0.846702532990197
ENSMUSG00000083657	Gm12245	12	11	14	14	31	21	14	18	10.1681044515012	11.4858436207008	14.599689667681	13.7772201206169	33.2574560091835	21.4569160046349	13.531308184768	18.1156249835215	17.049020380326	-0.934130276262224	0.391333513739897	-2.38704389852769	0.01698446306909	0.846702532990197
ENSMUSG00000081413	Uqcrh-ps2	8	18	8	14	38	28	6	8	6.7787363010008	18.795016833874	8.34267981010344	13.7772201206169	40.7672041402895	28.6092213395132	5.79913207918627	8.05138888156512	16.3650749382687	-1.27595065917909	0.535083844679443	-2.38458079395667	0.017098592984878	0.846702532990197
ENSMUSG00000071414	Gm6736	3	4	1	6	9	11	4	10	2.5420261128753	4.17667040752755	1.04283497626293	5.90452290883582	9.65539045427909	11.2393369548087	3.86608805279085	10.0642361019564	6.06138824616709	-1.55940581144413	0.653988842563211	-2.38445323521464	0.017104521803273	0.846702532990197
ENSMUSG00000096375	Gm7094	3	1	2	12	19	12	5	9	2.5420261128753	1.04416760188189	2.08566995252586	11.8090458176716	20.3836020701448	12.2610948597914	4.83261006598856	9.05781249176076	8.00200362158002	-1.63469135229853	0.687148823063325	-2.37894804943569	0.017362122672568	0.846702532990197
ENSMUSG00000034247	Plekhm1	1189	1150	960	1046	727	893	1124	1004	1007.48968273624	1200.79274216417	1001.12157721241	1029.35516044038	779.940984473433	912.429809149474	1086.37074283423	1010.44930463642	1003.49375045585	0.240552962544654	0.101283574215858	2.37504417085421	0.017546850251295	0.847139403770731
ENSMUSG00000032087	Dscaml1	1298	1010	1069	1119	764	854	1044	1059	1099.84996483738	1054.60927790071	1114.79058962507	1101.19352249788	819.635367452136	872.581250855152	1009.04898177841	1065.80260319718	1017.18894476799	0.226403034222864	0.095303192324696	2.375608085105	0.017520060382017	0.847139403770731
ENSMUSG00000024201	Kdm4b	2509	2129	1882	1947	1522	1725	2145	1968	2125.98117240138	2223.03282440654	1962.61542532683	1916.01768391722	1632.83380793475	1762.53238609501	2073.18971830909	1980.64166486502	1959.60558540698	0.200990681325927	0.084561201573288	2.37686643030647	0.017460409436108	0.847139403770731
ENSMUSG00000100213	Gm28151	104	97	115	104	121	113	103	160	88.1235719130104	101.284257382543	119.926022270237	102.345063753154	129.811360551974	115.458643263035	99.5517673593643	161.027777631302	114.691058015578	-0.409206961231641	0.172241432645068	-2.37577541563347	0.017512117913882	0.847139403770731
ENSMUSG00000104623	Gm6394	10	27	14	20	54	22	13	23	8.473420376251	28.192525250811	14.599689667681	19.6817430294527	57.9323427256746	22.4786739096175	12.5647861715703	23.1477430344997	23.3838655206947	-1.05364084945988	0.443446542315756	-2.37602675613972	0.01750019378132	0.847139403770731
ENSMUSG00000036264	Fstl4	608	429	412	499	292	411	527	436	515.183958876061	447.94790120733	429.648010220327	491.059488584846	313.263779183277	419.942498947854	509.357100955194	438.800694045299	445.650429002524	0.292908258374305	0.12353810582771	2.37099521974867	0.017740260527098	0.853593242634678
ENSMUSG00000031441	Atp11a	4653	4101	3465	3957	2781	3329	4253	3836	3942.68250106959	4282.13133531762	3613.42319275105	3894.03285837723	2983.51565037224	3401.43206568712	4110.61812212987	3860.64096871048	3761.0595868019	0.216497873549861	0.091301470922719	2.3712419018212	0.017728423797248	0.853593242634678
ENSMUSG00000104755	Mir677	0	0	0	0	1	4	1	5	0	0	0	0	1.07282116158657	4.08703161993045	0.966522013197712	5.0321180509782	1.39481160571162	-3.67157935907508	1.54923347432188	-2.36993288612111	0.01779131444327	0.854611022022027
ENSMUSG00000026697	Myoc	712	597	549	573	463	374	363	350	603.307530789071	623.368058323487	572.516401968348	563.881937793821	496.71619781458	382.137456463497	350.847490790769	352.248263568474	493.127917189006	0.40397426938034	0.17056322697807	2.36847224655454	0.017861720432606	0.854965678894828
ENSMUSG00000099377	Gm6159	66	90	47	70	140	97	107	91	55.9245744832566	93.9750841693699	49.0132438843577	68.8861006030846	150.194962622119	99.1105167833135	103.417855412155	91.5845485278033	89.0133608106825	-0.61408799667624	0.25930480630219	-2.36820907962883	0.017874431568379	0.854965678894828
ENSMUSG00000100481	Gm7114	5	18	5	11	25	15	9	22	4.2367101881255	18.795016833874	5.21417488131465	10.824958666199	26.8205290396641	15.3263685747392	8.69869811877941	22.1413194243041	14.007221965875	-1.17741688185388	0.497236920130245	-2.36791926380983	0.017888439032193	0.854965678894828
ENSMUSG00000048612	Myof	213	264	111	123	72	91	115	132	180.483854014146	275.660246896818	115.754682365185	121.042719631134	77.2431236342327	92.9799693534178	111.150031517737	132.847916545825	138.395317994812	0.669274785124314	0.283406380223848	2.36153746643138	0.018199332832808	0.860911464152557
ENSMUSG00000041797	Abca9	449	347	259	309	193	249	243	251	380.45657489367	362.326157853015	270.094258852099	304.082929805045	207.054484186207	254.417718340671	234.864849207044	252.612326159106	283.238662412107	0.383201449714544	0.162301875467591	2.36104141502088	0.0182236953155	0.860911464152557
ENSMUSG00000000184	Ccnd2	1042	917	827	894	694	799	825	710	882.930403205354	957.501690925691	862.424525369443	879.773913416538	744.537886141077	816.384566081108	797.380660888112	714.560763238905	831.936801158279	0.207545676383216	0.087874595334559	2.36183934154167	0.018184520857505	0.860911464152557
ENSMUSG00000042541	Sem1	1331	1254	1251	1235	1626	1301	1252	1308	1127.81225207901	1309.38617275989	1304.58655530492	1215.34763206871	1744.40720873976	1329.30703438238	1210.08556052354	1316.4020821359	1319.66681224926	-0.246679542042487	0.104432925329875	-2.36208591556057	0.018172430150305	0.860911464152557
ENSMUSG00000108702	Gm9333	37	62	23	54	93	59	46	57	31.3516553921287	64.738391316677	23.9852044540474	53.1407061795224	99.7723680275506	60.2837163939742	44.4600126070947	57.3661457811515	54.3872750190183	-0.736529182340159	0.311703314985126	-2.36291738628222	0.018131711027065	0.860911464152557
ENSMUSG00000092116	Gm10320	12	20	12	17	33	28	10	17	10.1681044515012	20.8833520376378	12.5140197151552	16.7294815750348	35.4030983323567	28.6092213395132	9.66522013197712	17.1092013733259	18.8852123695627	-0.956088701581594	0.404498866682778	-2.36363752863464	0.018096508513783	0.860911464152557
ENSMUSG00000062758	Gm16477	24	25	13	13	47	32	13	17	20.3362089030024	26.1041900470472	13.5568546914181	12.7931329691443	50.4225945945686	32.6962529594436	12.5647861715703	17.1092013733259	23.19790271369	-0.964917959501911	0.408677706591697	-2.36107314869011	0.018222135931079	0.860911464152557
ENSMUSG00000097900	Gm8652	36	55	24	47	77	78	67	56	30.5043133545036	57.4292181035038	25.0280394303103	46.252096119214	82.6072294421656	79.6971165886439	64.7569748842467	56.3597221709559	55.329338761693	-0.703655302955681	0.298152720114711	-2.36004991899775	0.018272476069441	0.861791482740402
ENSMUSG00000035615	Frmpd1	768	660	626	659	467	567	688	621	650.758684896077	689.150617242046	652.814695140594	648.513432820468	501.007482460926	579.336732125142	664.967145080026	624.989061931493	626.442231462096	0.217104320858648	0.092021677185148	2.35927367876413	0.018310746169392	0.862173700605246
ENSMUSG00000015568	Lpl	213	184	146	135	127	116	164	122	180.483854014146	192.126838746267	152.253906534388	132.851765448806	136.248287521494	118.523916977983	158.509610164425	122.783680443868	149.222732481422	0.37669150638321	0.159742726160547	2.3581136708824	0.018368067513739	0.862219426749112
ENSMUSG00000028029	Aimp1	1560	1256	1391	1392	1581	1499	1397	1411	1321.85357869516	1311.47450796365	1450.58345198173	1369.84931484991	1696.13025646836	1531.61509956894	1350.2312524372	1420.06371398605	1431.47514699388	-0.187014717969705	0.079309622210554	-2.35803314600605	0.018372052443589	0.862219426749112
ENSMUSG00000115471	C230086J09Rik	5	8	16	13	17	21	14	29	4.2367101881255	8.3533408150551	16.6853596202069	12.7931329691443	18.2379597469716	21.4569160046349	13.531308184768	29.1862846956736	15.5601265280725	-1.06029305488368	0.450151721301426	-2.35541264136075	0.018502146895854	0.866901410541643
ENSMUSG00000037254	Itih2	404	239	106	122	69	52	70	84	342.32618320054	249.556056849771	110.540507483871	120.058632479662	74.024660149473	53.1314110590959	67.6565409238398	84.5395832564338	137.729196925336	1.33570331579989	0.568446926512098	2.34974146838221	0.018786454445763	0.867107728867104
ENSMUSG00000028036	Ptgfr	49	32	54	52	27	21	50	36	41.5197598436299	33.4133632602204	56.3130887181982	51.1725318765771	28.9661713628373	21.4569160046349	48.3261006598856	36.2312499670431	39.6748977116283	0.674245252284678	0.287620824006445	2.34421570348317	0.019067140584672	0.867107728867104
ENSMUSG00000031145	Prickle3	57	45	38	43	27	29	50	30	48.2984961446307	46.9875420846849	39.6277290979913	42.3157475133234	28.9661713628373	29.6309792444958	48.3261006598856	30.1927083058692	39.2931843017148	0.609638952922427	0.260161087796881	2.34331336052222	0.019113322458496	0.867107728867104
ENSMUSG00000040152	Thbs1	336	265	165	188	150	172	146	82	284.706924642034	276.7044144987	172.067771083383	185.008384476856	160.923174237985	175.74235965701	141.112213926866	82.5267360360425	184.848997319859	0.60248770243162	0.256026271513488	2.35322609226795	0.018611313973941	0.867107728867104
ENSMUSG00000025270	Alas2	498	189	217	267	210	134	267	207	421.9763347373	197.347676755677	226.295189849056	262.751269443194	225.292443933179	136.91555926767	258.061377523789	208.329687310498	242.121192352545	0.525904808851099	0.223884431634394	2.34900124591918	0.018823843822902	0.867107728867104
ENSMUSG00000026072	Il1r1	152	150	100	106	75	98	128	93	128.795989719015	156.625140282283	104.283497626293	104.3132380561	80.4615871189925	100.132274688296	123.714817689307	93.5973957481946	111.49049261606	0.433722778517549	0.185037155471279	2.34397668626543	0.019079363967746	0.867107728867104
ENSMUSG00000048677	Tpcn2	287	226	201	196	139	175	210	189	243.187164798404	235.981878025307	209.609830228849	192.881081688637	149.122141460533	178.807633371957	202.969622771519	190.214062326976	200.346676834023	0.328529858136979	0.13984640980036	2.34921910834877	0.018812832620544	0.867107728867104
ENSMUSG00000025885	Myo5b	904	548	560	650	459	503	541	510	765.99720201309	572.203845831274	583.98758670724	639.656648457214	492.424913168234	513.944226206255	522.888409139962	513.276041199777	575.547359090381	0.285704652552695	0.121553456322544	2.35044449739522	0.018751003909235	0.867107728867104
ENSMUSG00000029313	Aff1	775	644	585	676	415	585	664	589	656.690079159453	672.443935611936	610.058461113814	665.242914395503	445.220782058425	597.728374414829	641.770616763281	592.783506405232	610.242333740309	0.251077183278602	0.107089573789243	2.34455301664317	0.019049901978528	0.867107728867104
ENSMUSG00000052105	Mtcl1	2665	2197	2171	2195	1687	1847	2276	2192	2258.16653027089	2294.03622133451	2263.99473346682	2160.07129748244	1809.84929959654	1887.18685050289	2199.80410203799	2206.08055354884	2134.89869853011	0.183607928404529	0.078109154768491	2.35065824164566	0.018740237371197	0.867107728867104
ENSMUSG00000078784	Rbis	669	592	656	779	811	762	744	751	566.871823171192	618.147220314077	684.099744428482	766.603890997184	870.057962046705	778.579523596751	719.092377819098	755.824131256926	719.909584203802	-0.256815987207406	0.109444976958332	-2.34653059779235	0.018949110286566	0.867107728867104
ENSMUSG00000036199	Ndufa13	3124	3173	2635	2655	3922	3149	3060	2927	2647.09652554081	3313.14380077123	2747.87016245282	2612.75138715985	4207.60459574251	3217.51564279025	2957.557360385	2945.80190704264	3081.16767273564	-0.275660128032918	0.117455215034436	-2.34693817513423	0.018928395282973	0.867107728867104
ENSMUSG00000070343	Gm10288	135	138	113	102	191	151	124	123	114.391175079389	144.0951290597	117.840352317711	100.376889450209	204.908841863034	154.285443652375	119.848729636516	123.790104054064	134.942083139125	-0.431871337731299	0.184278127723465	-2.34358435841818	0.019099442535053	0.867107728867104
ENSMUSG00000050675	Gp1ba	44	35	30	37	51	49	32	49	37.2830496555044	36.5458660658661	31.2850492878879	36.4112246044876	54.7138792409149	50.0661373441481	30.9287044223268	49.3147568995864	40.8185834400903	-0.572169120346117	0.243683551418186	-2.34800058114804	0.018874491855891	0.867107728867104
ENSMUSG00000049832	Rbx1-ps	27	40	18	29	61	37	21	34	22.8782350158777	41.7667040752755	18.7710295727327	28.5385273927065	65.4420908567805	37.8050424843567	20.2969622771519	34.2184027466518	33.7146243026917	-0.793954974052504	0.338789919880054	-2.3435023519401	0.019103641798603	0.867107728867104
ENSMUSG00000056772	Rps6-ps2	25	18	10	21	51	27	21	21	21.1835509406275	18.795016833874	10.4283497626293	20.6658301809254	54.7138792409149	27.5874634345306	20.2969622771519	21.1348958141085	24.3507435605952	-0.90688636415921	0.385629664913829	-2.35170280367787	0.018687699361769	0.867107728867104
ENSMUSG00000111966	Gm5781	113	168	67	121	330	170	146	164	95.7496502516363	175.420157116157	69.8699434096163	119.074545328189	354.030983323567	173.698843847044	141.112213926866	165.053472072085	161.751226159395	-0.941458773704687	0.400095113704228	-2.35308740711256	0.018618257027011	0.867107728867104
ENSMUSG00000109241	Gm7434	8	10	9	15	26	22	16	17	6.7787363010008	10.4416760188189	9.38551478636636	14.7613072720896	27.8933502012507	22.4786739096175	15.4643522111634	17.1092013733259	15.5391015092041	-0.987604841568675	0.420801656432733	-2.34696044198331	0.018927264147352	0.867107728867104
ENSMUSG00000113660	Gm5626	8	5	5	8	21	10	10	15	6.7787363010008	5.22083800940944	5.21417488131465	7.8726972117811	22.5292443933179	10.2175790498261	9.66522013197712	15.0963541529346	10.3243555164452	-1.19025988084688	0.50704657446338	-2.34743698270038	0.018903070478962	0.867107728867104
ENSMUSG00000108630	Gm44607	0	0	1	0	1	3	0	6	0	0	1.04283497626293	0	1.07282116158657	3.06527371494784	0	6.03854166117384	1.4024339392464	-3.66976306537243	1.55855494013873	-2.35459332928346	0.018542986581747	0.867107728867104
ENSMUSG00000060419	Rps16-ps2	173	167	125	186	304	200	173	148	146.590172509142	174.375989514275	130.354372032866	183.040210173911	326.137633122316	204.351580996523	167.208308283204	148.950694308955	185.126120117649	-0.497253742703741	0.212284088093707	-2.34239761994898	0.019160289963876	0.867860930994532
ENSMUSG00000045232	Rln3	18	49	7	3	4	7	23	7	15.2521566772518	51.1642124922125	7.29984483384051	2.95226145441791	4.29128464634626	7.15230533487829	22.2300063035474	7.04496527136948	14.673379626733	1.67635132822629	0.716040688457301	2.34113976377232	0.019224968716141	0.868136934718908
ENSMUSG00000082755	Gm8692	12	13	7	19	36	21	15	17	10.1681044515012	13.5741788244645	7.29984483384051	18.6976558779801	38.6215618171164	21.4569160046349	14.4978301979657	17.1092013733259	17.6781616726036	-0.998887514233478	0.426674843950689	-2.34109774315385	0.019227132699243	0.868136934718908
ENSMUSG00000046636	Gm7729	62	93	41	100	136	126	92	82	52.5352063327562	97.1075869750156	42.7562340267801	98.4087151472637	145.903677975773	128.741496027809	88.9200252141895	82.5267360360425	92.1124597169537	-0.649306643874274	0.277550896320903	-2.33941468927396	0.019313982031557	0.870682839816937
ENSMUSG00000023968	Crip3	185	146	155	146	106	130	146	110	156.758276960644	152.448469874756	161.639421320754	143.676724115005	113.719043128176	132.82852764774	141.112213926866	110.70659712152	139.111159261933	0.343505408687883	0.147169532728911	2.33407963128228	0.019591552634357	0.876257091520559
ENSMUSG00000063564	Col23a1	1527	829	1091	1312	909	929	1067	810	1293.89129145353	865.614941960085	1137.73295910286	1291.1223427321	975.194435882188	949.213093728848	1031.27898808196	815.203124258469	1044.90639715	0.300284421647158	0.128666068788715	2.33382759319601	0.019604751344907	0.876257091520559
ENSMUSG00000010406	Mrpl52	695	608	659	597	868	702	698	653	588.902716149445	634.853901944188	687.22824935727	587.500029429164	931.208768257139	717.274049297795	674.632365212003	657.194617457753	684.849337138095	-0.276096850355626	0.118280044853677	-2.33426399776211	0.019581902661152	0.876257091520559
ENSMUSG00000091803	Cox16	255	189	233	220	238	251	192	262	216.072219594401	197.347676755677	242.980549469263	216.49917332398	255.331436457603	256.461234150636	185.572226533961	263.682985871258	229.243437769597	-0.288622701461944	0.123589193131677	-2.33533931364397	0.019525701960886	0.876257091520559
ENSMUSG00000109658	Gm45660	11	17	6	13	35	21	5	11	9.3207624138761	17.7508492319921	6.25700985757758	12.7931329691443	37.5487406555298	21.4569160046349	4.83261006598856	11.070659712152	15.1288351138619	-1.19749772249522	0.512706197929199	-2.33564120607839	0.019509949098874	0.876257091520559
ENSMUSG00000083362	Gm8606	9	20	5	10	53	21	21	13	7.6260783386259	20.8833520376378	5.21417488131465	9.84087151472637	56.859521564088	21.4569160046349	20.2969622771519	13.0835069325433	19.4076729438404	-1.25473378479411	0.537703180717389	-2.33350634660572	0.019621585618878	0.876257091520559
ENSMUSG00000027966	Col11a1	2303	1839	1800	1934	1264	1840	1697	1435	1951.42871265061	1920.22421986079	1877.10295727327	1903.22455094808	1356.04594824542	1880.03454516801	1640.18785639652	1444.21788063074	1746.55833389668	0.252321821797149	0.108230480020573	2.33133791653872	0.019735548379137	0.87723438293017
ENSMUSG00000040952	Rps19	5046	4462	4444	4446	6184	4757	4264	4402	4275.68792185626	4659.07583959698	4634.35863451246	4375.25147544735	6634.32606325132	4860.50235400229	4121.24986427504	4430.27673208121	4748.84111062786	-0.266415200459076	0.114274632218002	-2.33135907145896	0.019734433787312	0.87723438293017
ENSMUSG00000083892	Gm1848	25	13	8	21	29	28	13	25	21.1835509406275	13.5741788244645	8.34267981010344	20.6658301809254	31.1118136860104	28.6092213395132	12.5647861715703	25.160590254891	20.1515814010132	-0.878175934761679	0.376617688816508	-2.33174373068158	0.019714176785282	0.87723438293017
ENSMUSG00000069378	Prdm6	34	44	10	11	9	6	3	3	28.8096292792534	45.9433744828031	10.4283497626293	10.824958666199	9.65539045427909	6.13054742989568	2.89956603959314	3.01927083058692	14.713885868155	1.66325917063819	0.715862863877163	2.32343267763585	0.020155920347472	0.877534220544068
ENSMUSG00000048583	Igf2	254	309	62	77	44	57	56	41	215.224877556775	322.647788981503	64.6557685283016	75.7747106633931	47.2041311098089	58.240200584009	54.1252327390719	41.2633680180213	109.892009772611	1.58285640855041	0.682757497430613	2.31832885688857	0.020431455259989	0.877534220544068
ENSMUSG00000031351	Zfp185	65	156	62	58	35	46	50	45	55.0772324456315	162.890145893574	64.6557685283016	57.077054785413	37.5487406555298	47.0008636292002	48.3261006598856	45.2890624588038	64.7331211320425	0.838311333771375	0.360681110783853	2.32424518142774	0.020112357020831	0.877534220544068
ENSMUSG00000028073	Pear1	338	276	173	197	167	144	207	187	286.401608717284	288.190258119401	180.410450893487	193.86516884011	179.161133984957	147.133138317496	200.070056731926	188.201215106585	207.929128838906	0.423447820577741	0.182753152936243	2.3170479620971	0.020501119235463	0.877534220544068
ENSMUSG00000020891	Alox8	228	190	171	177	128	164	160	112	193.193984578523	198.391844357559	178.324780940961	174.183425810657	137.32110868308	167.568296417149	154.643522111634	112.719444341912	164.543300905184	0.369300462021843	0.158606980570207	2.32839980115738	0.019890884209166	0.877534220544068
ENSMUSG00000032489	Kif9	436	344	269	316	216	223	345	324	369.441128404544	359.193655047369	280.522608614728	310.971539865353	231.729370902698	227.852012811123	333.450094553211	326.081249703388	304.905207487802	0.336689196780255	0.145118649501649	2.32009598998115	0.020335685222471	0.877534220544068
ENSMUSG00000023795	Pisd-ps2	1610	1301	1642	1292	767	1232	1438	1304	1364.22068057641	1358.46205004834	1712.33503102373	1271.44059970265	822.853830936896	1258.80573893858	1389.85865497831	1312.37638769512	1311.2941217375	0.326542136476242	0.140974289762669	2.31632404054652	0.020540582678842	0.877534220544068
ENSMUSG00000038894	Irs2	3740	3223	2924	3183	2104	2949	3286	2903	3169.05922071787	3365.35218086532	3049.24947059281	3132.3494031374	2257.21572397813	3013.16406179373	3175.99133536768	2921.64774039794	3010.50364210636	0.218806756423547	0.09410570405355	2.32511683137758	0.020065713883551	0.877534220544068
ENSMUSG00000053693	Mast1	4494	3596	3132	3443	2507	3070	3645	3374	3807.9551170872	3754.82669636727	3266.15914565549	3388.21206252029	2689.56265209752	3136.79676829662	3522.97273810566	3395.67326080009	3370.26980511627	0.206846900211122	0.089235786521387	2.31798147665285	0.020450327780841	0.877534220544068
ENSMUSG00000055817	Mta3	4156	3021	3062	3507	2478	2917	3290	3098	3521.55350836992	3154.43032528518	3193.16069731709	3451.19364021454	2658.45083841151	2980.46780883428	3179.85742342047	3117.90034438609	3157.12682327989	0.177084145706273	0.07632666813223	2.32008222079716	0.020336429929022	0.877534220544068
ENSMUSG00000030310	Slc6a1	18656	14513	14879	15152	12922	13996	15091	13534	15808.0130539339	15154.0044061118	15516.3416118161	14910.8885191134	13862.9950500216	14300.5236381367	14585.7837011667	13620.9371403878	14719.935890086	0.125621788478708	0.0541024742012	2.32192317141609	0.020237072885045	0.877534220544068
ENSMUSG00000036504	Phpt1	989	752	805	746	942	881	816	843	838.021275211224	785.21403661518	839.482155891658	734.129014998587	1010.59753421455	900.168714289682	788.681962769333	848.415103394925	843.088724673142	-0.205724286751251	0.088282172424302	-2.33030385526194	0.019790097148867	0.877534220544068
ENSMUSG00000029649	Pomp	2708	2363	2499	2519	3132	2647	2646	2563	2294.60223788877	2467.3680432469	2606.04460568106	2478.91553455957	3360.07587808912	2704.59317448898	2557.41724692115	2579.46371293143	2631.06005422587	-0.215881276950529	0.092839246736887	-2.3253234438917	0.02005467162678	0.877534220544068
ENSMUSG00000024907	Gal	974	586	732	831	928	809	713	846	825.311144646848	611.882214702786	763.355202624464	817.776422873762	995.578037952333	826.602145130934	689.130195409969	851.434374225512	797.633717195826	-0.26425349099795	0.113766635728213	-2.32276791263519	0.020191623708594	0.877534220544068
ENSMUSG00000000581	C1d	1798	1456	1802	1771	2317	1708	1692	1796	1523.52098364993	1520.30802834003	1879.1886272258	1742.81834525804	2485.72663139607	1745.1625017103	1635.35524633053	1807.53680391137	1792.45214597776	-0.277759882503537	0.119838698707747	-2.31778119671439	0.020461215525237	0.877534220544068
ENSMUSG00000086922	Gm13835	65	71	54	80	106	77	70	86	55.0772324456315	74.135899733614	56.3130887181982	78.726972117811	113.719043128176	78.6753586836612	67.6565409238398	86.5524304768251	76.3570707784696	-0.486799232205075	0.209072420660825	-2.32837612281154	0.019892140387884	0.877534220544068
ENSMUSG00000091955	Gm9844	100	122	58	109	166	135	111	107	84.73420376251	127.38844742959	60.4844286232499	107.265499510517	178.08831282337	137.937317172653	107.283943464946	107.687326290934	113.858684884721	-0.535196017581117	0.23002418604462	-2.32669453931814	0.019981528705054	0.877534220544068
ENSMUSG00000058927	Gm10053	67	98	41	91	119	109	63	83	56.7719165208817	102.328424984425	42.7562340267801	89.55193078401	127.665718228801	111.371611643105	60.8908868314558	83.5331596462382	84.3587353332121	-0.610950130401264	0.262881900291054	-2.32404790791926	0.020122926507224	0.877534220544068
ENSMUSG00000096403	Rnps1-ps	43	63	33	61	89	75	53	56	36.4357076178793	65.7825589185589	34.4135542166767	60.0293162398309	95.4810833812044	76.631842873696	51.2256666994787	56.3597221709559	59.5449315147851	-0.620894109828566	0.266972487387293	-2.32568575101091	0.020035321187853	0.877534220544068
ENSMUSG00000083454	Gm13226	33	50	20	53	75	45	40	63	27.9622872416283	52.2083800940944	20.8566995252586	52.1566190280498	80.4615871189925	45.9791057242176	38.6608805279085	63.4046874423254	47.7112808378094	-0.723286318013216	0.312240345366921	-2.31644093643077	0.020534205802386	0.877534220544068
ENSMUSG00000058542	Gm15590	30	35	16	36	60	49	35	33	25.420261128753	36.5458660658661	16.6853596202069	35.4271374530149	64.369269695194	50.0661373441481	33.8282704619199	33.2119791364561	36.9442851131949	-0.732706162644377	0.31621591050764	-2.31710719890128	0.020497892963008	0.877534220544068
ENSMUSG00000113015	Gm6296	12	27	14	28	47	35	28	30	10.1681044515012	28.192525250811	14.599689667681	27.5544402412338	50.4225945945686	35.7615266743915	27.0626163695359	30.1927083058692	27.994275694449	-0.855473284752895	0.368937365156973	-2.3187493746775	0.020408629638681	0.877534220544068
ENSMUSG00000083863	Gm13341	1860	2972	1344	2784	5704	3896	3291	3034	1576.05618998269	3103.26611279297	1401.57020809738	2739.69862969982	6119.37190568977	3980.76879781226	3180.82394543367	3053.48923333357	3144.38062785527	-0.86923364487091	0.374677246550197	-2.31995311397821	0.02034341383096	0.877534220544068
ENSMUSG00000108055	Gm43876	12	6	12	7	21	17	16	22	10.1681044515012	6.26500561129133	12.5140197151552	6.88861006030846	22.5292443933179	17.3698843847044	15.4643522111634	22.1413194243041	14.1675675314682	-1.00819201179009	0.434800349831696	-2.31874701154299	0.020408757846976	0.877534220544068
ENSMUSG00000112341	Gm4796	3	8	8	7	28	18	17	12	2.5420261128753	8.3533408150551	8.34267981010344	6.88861006030846	30.0389925244238	18.391642289687	16.4308742243611	12.0770833223477	12.8831561448952	-1.25086202254234	0.538618261246347	-2.3223535341113	0.020213907161635	0.877534220544068
ENSMUSG00000105833	Gm4751	1	2	0	3	10	4	0	4	0.8473420376251	2.08833520376378	0	2.95226145441791	10.7282116158657	4.08703161993045	0	4.02569444078256	3.09110954654818	-2.41895836995315	1.0440595937424	-2.31687768059528	0.020510395911115	0.877534220544068
ENSMUSG00000109495	Gm47692	52	69	28	57	106	74	70	65	44.0617859565052	72.0475645298502	29.199379335362	56.0929676339403	113.719043128176	75.6100849687134	67.6565409238398	65.4175346627166	65.475612642388	-0.657462327441297	0.28398181589195	-2.31515643132393	0.020604372651697	0.878945633967389
ENSMUSG00000114023	Gm6474	46	74	22	70	118	64	61	79	38.9777337307546	77.2684025392597	22.9423694777844	68.8861006030846	126.592897067215	65.3925059188873	58.9578428050604	79.5074652054556	67.3156646684377	-0.76118402834179	0.328882013609961	-2.31445927974802	0.020642542423478	0.879261557385148
ENSMUSG00000028715	Cyp4a14	32	1	1	1	0	0	0	1	27.1149452040032	1.04416760188189	1.04283497626293	0.984087151472637	0	0	0	1.00642361019564	3.89905731797704	4.04393588179317	1.75154660129076	2.30878006831967	0.020955788602236	0.881644976350534
ENSMUSG00000050377	Il31ra	22	9	4	5	0	1	1	3	18.6415248277522	9.39750841693699	4.17133990505172	4.92043575736319	0	1.02175790498261	0.966522013197712	3.01927083058692	5.26729495698392	2.4923472783009	1.07827843971434	2.31141344063337	0.020810029256451	0.881644976350534
ENSMUSG00000029843	Slc13a4	579	821	100	120	83	44	68	95	490.611039784933	857.26160114503	104.283497626293	118.090458176716	89.044156411685	44.957347819235	65.7234968974444	95.6102429685859	233.19773010374	2.09594237854633	0.910057754163447	2.30308721502294	0.021273936498399	0.881644976350534
ENSMUSG00000028716	Pdzk1ip1	26	16	12	13	4	8	4	2	22.0308929782526	16.7066816301102	12.5140197151552	12.7931329691443	4.29128464634626	8.17406323986091	3.86608805279085	2.01284722039128	10.2986263065064	1.49840908239473	0.649470240283418	2.30712508357711	0.021047847969335	0.881644976350534
ENSMUSG00000026315	Serpinb8	8	19	17	14	5	5	11	6	6.7787363010008	19.8391844357559	17.7281945964698	13.7772201206169	5.36410580793283	5.10878952491307	10.6317421451748	6.03854166117384	10.6583143241297	1.30867644023707	0.566873504485628	2.30858635988736	0.020966545569529	0.881644976350534
ENSMUSG00000040212	Emp3	134	74	69	55	57	33	51	42	113.543833041763	77.2684025392597	71.9556133621421	54.124793330995	61.1508062104343	33.7180108644262	49.2926226730833	42.2697916282169	62.9154842062901	0.685942137441156	0.29778796733267	2.30345820747977	0.021253075990209	0.881644976350534
ENSMUSG00000042644	Itpr3	334	241	170	195	107	178	179	173	283.012240566783	251.644392053535	177.281945964698	191.896994537164	114.791864289763	181.872907086905	173.00744036239	174.111284563846	193.452383678136	0.457013352385512	0.199590482106178	2.28975524064514	0.022035509159419	0.881644976350534
ENSMUSG00000036304	Zdhhc23	159	120	113	142	79	91	126	116	134.727383982391	125.300112225827	117.840352317711	139.740375509115	84.7528717653387	92.9799693534178	121.781773662912	116.745138782694	116.733497199926	0.380934759079561	0.166245603456096	2.29139749358943	0.021940434411503	0.881644976350534
ENSMUSG00000056427	Slit3	591	530	422	504	289	386	470	475	500.779144236434	553.408828997401	440.076359982956	495.979924342209	310.045315698518	394.398551323289	454.265346202925	478.051214842929	453.375585703333	0.309710313116138	0.134754086716179	2.29833707209529	0.021542612040005	0.881644976350534
ENSMUSG00000047485	Klhl34	404	338	278	348	220	269	362	314	342.32618320054	352.928649436078	289.908123401094	342.462328712478	236.020655549045	274.852876440323	349.880968777572	316.017013601431	313.04959988982	0.28294517281399	0.12347123105838	2.29158784915821	0.021929437295464	0.881644976350534
ENSMUSG00000023022	Lima1	654	567	464	519	350	437	470	468	554.161692606815	592.04303026703	483.875428985999	510.741231614299	375.487406555298	446.508204477402	454.265346202925	471.00624957156	486.011073785166	0.267510272631136	0.116643009140215	2.29341024895512	0.021824397133436	0.881644976350534
ENSMUSG00000009687	Fxyd5	562	445	393	410	376	353	442	341	476.206225145306	464.65458283744	409.834145671331	403.475732103781	403.380756756549	360.680540458863	427.202729833389	343.190451076713	411.078145485422	0.242851660377584	0.105710813024984	2.29732090245287	0.021600470251561	0.881644976350534
ENSMUSG00000024085	Man2a1	890	638	672	692	532	590	787	668	754.134413486339	666.178930000644	700.785104048689	680.988308819065	570.740857964053	602.837163939742	760.652824386599	672.290971610688	676.076071781977	0.211977174919858	0.09196922369157	2.30487076449345	0.021173812403257	0.881644976350534
ENSMUSG00000026185	Igfbp5	8689	6766	5746	6724	4942	5907	7488	6445	7362.55496492449	7064.83799433285	5992.12977360679	6617.00200650201	5301.88218056081	6035.5239447323	7237.31683482447	6486.4001677109	6512.20598339933	0.206356885148271	0.089957176197718	2.29394578476671	0.021793613072976	0.881644976350534
ENSMUSG00000024736	Tmem132a	2725	2436	2137	2034	1752	1872	2366	2127	2309.0070525284	2543.59227818428	2228.53834427388	2001.63326609534	1879.58267509966	1912.73079812745	2286.79108322579	2140.66301888613	2162.81731455262	0.201182771304229	0.087807185415689	2.29118802011255	0.021952541541508	0.881644976350534
ENSMUSG00000058740	Kcnt1	6968	5297	4845	5475	4092	4755	5208	4989	5904.2793181717	5530.95578716836	5052.53545999389	5387.87715431269	4389.98419321223	4858.45883819233	5033.64664473368	5021.04739126605	5147.34809838137	0.178256273420131	0.077599242120988	2.29713936048763	0.021610821036487	0.881644976350534
ENSMUSG00000038351	Sgsm2	4886	4006	3799	4037	3287	3386	3882	3791	4140.11319583624	4182.93541313884	3961.73007482287	3972.75983049504	3526.36315813504	3459.67226627113	3752.03845523352	3815.35190625167	3851.37053752304	0.152470522397747	0.066154625766544	2.30475980524487	0.021180029387277	0.881644976350534
ENSMUSG00000071415	Rpl23	8138	6335	6872	7664	9339	7638	7231	7032	6895.66950219306	6614.80175792176	7166.36195687885	7542.04392888629	10019.0768280569	7804.1868782572	6988.92067743265	7077.17082689574	7513.52904456531	-0.237164808634299	0.102649572163211	-2.3104315355276	0.020864274869235	0.881644976350534
ENSMUSG00000060636	Rpl35a	5445	4320	4555	5102	6758	5075	4865	4632	4613.77739486867	4510.80404012975	4750.11331687764	5020.8126468134	7250.12541000201	5185.42136778676	4702.12959420687	4661.75416242621	5086.86724163891	-0.271984892287874	0.118652700179268	-2.29227730912944	0.02188964632958	0.881644976350534
ENSMUSG00000016252	Atp5e	2115	2230	1915	2061	2834	2179	1876	2032	1792.12840957709	2328.49375219661	1997.02897954351	2028.20361918511	3040.37517193633	2226.41047495711	1813.19529675891	2045.05277591754	2158.86106000903	-0.29124130785028	0.126780408787896	-2.29721067028209	0.021606754727073	0.881644976350534
ENSMUSG00000082016	Pgam1-ps2	102	110	78	90	139	123	116	112	86.4288878377602	114.858436207008	81.3411281485085	88.5678436325374	149.122141460533	125.676222312861	112.116553530935	112.719444341912	108.853832184007	-0.418377940483467	0.181031671480692	-2.311075940809	0.02082866064375	0.881644976350534
ENSMUSG00000106190	Gm20768	58	78	55	92	96	111	77	84	49.1458381822558	81.4450729467872	57.3559236944611	90.5360179354826	102.99083151231	113.41512745307	74.4221950162238	84.5395832564338	81.7313237496281	-0.510301432961513	0.222825322666807	-2.29014111526531	0.022013137614319	0.881644976350534
ENSMUSG00000087249	Gm16062	41	33	25	36	56	49	40	43	34.7410235426291	34.4575308621023	26.0708744065732	35.4271374530149	60.0779850488477	50.0661373441481	38.6608805279085	43.2762152384125	40.3472230529545	-0.590085703619602	0.256194218861488	-2.30327486015066	0.021263383186147	0.881644976350534
ENSMUSG00000080776	Gm12174	79	86	66	80	171	99	96	74	66.9400209723829	89.7984137618423	68.8271084333533	78.726972117811	183.452418631303	101.154032593279	92.7861132669803	74.4753471544774	94.5200533664286	-0.590695508377383	0.256881425201192	-2.29948704120878	0.021477298398179	0.881644976350534
ENSMUSG00000083270	Gm13498	72	122	40	99	125	163	80	88	61.0086267090072	127.38844742959	41.7133990505172	97.4246279957911	134.102645198321	166.546538512166	77.3217610558169	88.5652776972164	99.2589154560532	-0.681605251700601	0.295470753493338	-2.30684507228553	0.021063458543504	0.881644976350534
ENSMUSG00000082185	Gm12428	52	100	46	87	160	114	126	102	44.0617859565052	104.416760188189	47.9704089080948	85.6155821781194	171.651385853851	116.480401168018	121.781773662912	102.655208239955	99.3291632694555	-0.690689604109311	0.30121195879321	-2.29303513338754	0.021845982328702	0.881644976350534
ENSMUSG00000066245	Gm10156	39	52	13	26	60	56	36	45	33.0463394673789	54.2967152978582	13.5568546914181	25.5862659382886	64.369269695194	57.2184426790264	34.7947924751176	45.2890624588038	41.0197178378857	-0.785392462277535	0.340354516957644	-2.30757173225727	0.021022968257622	0.881644976350534
ENSMUSG00000110532	Gm35857	24	33	12	31	57	38	40	41	20.3362089030024	34.4575308621023	12.5140197151552	30.5067016956518	61.1508062104343	38.8268003893393	38.6608805279085	41.2633680180213	34.7145395402019	-0.785976059418629	0.343258878985774	-2.28974720695048	0.02203597513262	0.881644976350534
ENSMUSG00000058905	Gm10051	31	41	14	32	75	48	40	33	26.2676031663781	42.8108716771574	14.599689667681	31.4907888471244	80.4615871189925	49.0443794391654	38.6608805279085	33.2119791364561	39.5684724476079	-0.816194063091859	0.354632704717158	-2.30151943753418	0.021362287988797	0.881644976350534
ENSMUSG00000109385	Gm44518	16	10	22	25	37	36	32	32	13.5574726020016	10.4416760188189	22.9423694777844	24.6021787868159	39.6943829787029	36.7832845793741	30.9287044223268	32.2055555262605	26.3944530490106	-0.823020623147207	0.358010597079668	-2.29887223970653	0.021512195181638	0.881644976350534
ENSMUSG00000082935	Gm7658	12	37	23	43	61	37	29	51	10.1681044515012	38.6342012696298	23.9852044540474	42.3157475133234	65.4420908567805	37.8050424843567	28.0291383827336	51.3276041199777	37.2133916915438	-0.854694604391238	0.370789439206991	-2.30506728082433	0.021162805605133	0.881644976350534
ENSMUSG00000101502	Rpl7a-ps10	20	26	16	25	61	36	25	19	16.946840752502	27.1483576489291	16.6853596202069	24.6021787868159	65.4420908567805	36.7832845793741	24.1630503299428	19.1220485937172	28.8616513960336	-0.883618397397397	0.382689226357844	-2.30897118742283	0.020945180138672	0.881644976350534
ENSMUSG00000089838	Gm2962	28	49	11	43	96	48	47	45	23.7255770535028	51.1642124922125	11.4711847388922	42.3157475133234	102.99083151231	49.0443794391654	45.4265346202925	45.2890624588038	46.4284412285629	-0.917366098539363	0.398741779780947	-2.30065206370731	0.021411305667497	0.881644976350534
ENSMUSG00000081974	Gm11960	12	6	12	15	20	19	14	25	10.1681044515012	6.26500561129133	12.5140197151552	14.7613072720896	21.4564232317313	19.4134001946697	13.531308184768	25.160590254891	15.4087698645121	-0.942507397982373	0.408138232435223	-2.30928475472329	0.020927785071273	0.881644976350534
ENSMUSG00000057657	Rps18-ps3	11	21	13	13	45	21	16	17	9.3207624138761	21.9275196395196	13.5568546914181	12.7931329691443	48.2769522713955	21.4569160046349	15.4643522111634	17.1092013733259	19.9882114468097	-0.990005641763583	0.431642743642471	-2.29357647347271	0.021814838047172	0.881644976350534
ENSMUSG00000082872	Gm15773	15	18	4	19	39	16	15	27	12.7101305643765	18.795016833874	4.17133990505172	18.6976558779801	41.8400253018761	16.3481264797218	14.4978301979657	27.1734374752823	19.279195329516	-1.04333148968099	0.451352810280917	-2.31156528975999	0.020801651295608	0.881644976350534
ENSMUSG00000082220	Gm12943	7	17	5	11	24	18	4	15	5.9313942633757	17.7508492319921	5.21417488131465	10.824958666199	25.7477078780776	18.391642289687	3.86608805279085	15.0963541529346	12.8528961770464	-1.18856663608404	0.517713241488021	-2.29580111311783	0.021687255775801	0.881644976350534
ENSMUSG00000089698	Gm2541	3	7	6	8	19	14	7	9	2.5420261128753	7.30917321317321	6.25700985757758	7.8726972117811	20.3836020701448	14.3046106697566	6.76565409238398	9.05781249176076	9.31157321493166	-1.25603388828782	0.546395411341079	-2.29876361004752	0.021518366245185	0.881644976350534
ENSMUSG00000063739	Gm4963	4	7	4	2	14	10	5	9	3.3893681505004	7.30917321317321	4.17133990505172	1.96817430294527	15.0194962622119	10.2175790498261	4.83261006598856	9.05781249176076	6.99569418018225	-1.40712625303645	0.611448154494819	-2.3013010059684	0.021374622941516	0.881644976350534
ENSMUSG00000110443	Gm39197	2	4	3	4	24	13	12	5	1.6946840752502	4.17667040752755	3.12850492878879	3.93634860589055	25.7477078780776	13.282852764774	11.5982641583725	5.0321180509782	8.57464385870742	-1.58225591616596	0.691120732546114	-2.28940594841783	0.022055776847928	0.881644976350534
ENSMUSG00000083864	Gm13719	3	4	2	2	14	8	2	3	2.5420261128753	4.17667040752755	2.08566995252586	1.96817430294527	15.0194962622119	8.17406323986091	1.93304402639542	3.01927083058692	4.86480189186615	-1.7809638396951	0.777131321611808	-2.29171542848292	0.021922069538161	0.881644976350534
ENSMUSG00000076436	Oxct2a	2	0	0	0	5	5	1	3	1.6946840752502	0	0	0	5.36410580793283	5.10878952491307	0.966522013197712	3.01927083058692	2.01917153148509	-2.9860997838086	1.29765735960444	-2.30114657132515	0.021383347694659	0.881644976350534
ENSMUSG00000113018	Gm9318	0	0	1	0	3	2	0	4	0	0	1.04283497626293	0	3.2184634847597	2.04351580996523	0	4.02569444078256	1.2913135889713	-3.53390777579298	1.54217855288231	-2.29150364540355	0.021934301276302	0.881644976350534
ENSMUSG00000077645	Gm24983	0	1	0	0	3	4	0	2	0	1.04416760188189	0	0	3.2184634847597	4.08703161993045	0	2.01284722039128	1.29531374087042	-3.53765050340281	1.54172996071137	-2.29459801233317	0.021756172293152	0.881644976350534
ENSMUSG00000074207	Adh1	53	46	29	25	24	13	17	12	44.9091279941303	48.0317096865668	30.242214311625	24.6021787868159	25.7477078780776	13.282852764774	16.4308742243611	12.0770833223477	26.9154686210873	0.953436622284087	0.416669309449672	2.28823337995152	0.02212393379253	0.883134290117732
ENSMUSG00000021782	Dlg5	3379	2661	2507	2823	1946	2333	2810	2701	2863.16874513521	2778.5299886077	2614.38728549116	2778.07802860725	2087.70998044746	2383.76119232444	2715.92685708557	2718.35017113843	2617.48903110465	0.198313293608063	0.086692475404948	2.28754909444822	0.022163793293947	0.883491459043661
ENSMUSG00000103898	Gm30238	109	91	84	66	51	59	108	75	92.3602821011359	95.0192517712518	87.5981380060861	64.9497519971941	54.7138792409149	60.2837163939742	104.384377425353	75.481770764673	79.3488959625729	0.483674168905957	0.211777069063692	2.28388357174067	0.022378374373516	0.887096141427812
ENSMUSG00000052229	Gpr17	1952	1778	1852	1960	1337	1557	2028	1798	1654.0116574442	1856.529996146	1931.33037603895	1928.81081688637	1434.36189304124	1590.87705805793	1960.10664276496	1809.54965113176	1770.69726143892	0.210955473948076	0.092348636790219	2.28433771499289	0.022351691000183	0.887096141427812
ENSMUSG00000030084	Plxna1	6117	4936	4553	5207	3623	4172	5112	4996	5183.19124415274	5154.011282889	4748.02764692512	5124.14179771802	3886.83106842813	4262.77397958746	4940.8605314667	5028.09235653742	4790.99123846307	0.195423250756568	0.085527543944871	2.28491596675024	0.022317755619594	0.887096141427812
ENSMUSG00000081824	Ndufs5-ps	54	82	49	88	112	89	82	93	45.7564700317554	85.6217433543148	51.0989138368835	86.5996693295921	120.155970097695	90.9364535434526	79.2548050822124	93.5973957481946	81.6276776280126	-0.546258791125811	0.239085359983204	-2.28478561449428	0.022325401580558	0.887096141427812
ENSMUSG00000108394	Gm45477	7	1	10	12	22	20	12	13	5.9313942633757	1.04416760188189	10.4283497626293	11.8090458176716	23.6020655549045	20.4351580996523	11.5982641583725	13.0835069325433	12.2414940238789	-1.21980576527732	0.534345612522497	-2.28280299620869	0.022441975402822	0.888385178653831
ENSMUSG00000027249	F2	69	3	3	4	2	3	2	3	58.4666005961319	3.13250280564566	3.12850492878879	3.93634860589055	2.14564232317313	3.06527371494784	1.93304402639542	3.01927083058692	9.85339847894503	2.37453969131464	1.04909118420824	2.26342545534468	0.023609475047806	0.889302862611622
ENSMUSG00000085870	Gm12829	15	16	5	6	1	1	2	4	12.7101305643765	16.7066816301102	5.21417488131465	5.90452290883582	1.07282116158657	1.02175790498261	1.93304402639542	4.02569444078256	6.07360343979804	2.0488473701281	0.90000226643293	2.27649134512572	0.022816618032752	0.889302862611622
ENSMUSG00000032278	Paqr5	144	155	150	180	76	72	105	141	122.017253418014	161.845978291693	156.425246439439	177.135687265075	81.534408280579	73.5665691587482	101.48481138576	141.905729037585	126.989460409612	0.535235278080438	0.235617883934693	2.27162416172446	0.023109220266734	0.889302862611622
ENSMUSG00000001053	N4bp3	368	299	327	247	221	252	277	221	311.821869846037	312.206112962684	341.007037237978	243.069526413741	237.093476710631	257.482992055619	267.726597655766	222.419617853237	274.103403841962	0.3042220244564	0.133860105834785	2.27268626869219	0.023045092714626	0.889302862611622
ENSMUSG00000033276	Stk36	505	424	345	426	243	341	432	393	427.907729000676	442.72706319792	359.778066810711	419.221126527343	260.695542265536	348.419445599071	417.537509701412	395.524478806887	383.976370238694	0.303150045684162	0.13310151183639	2.27758529186954	0.022751297631848	0.889302862611622
ENSMUSG00000029070	Mxra8	691	540	435	480	402	358	422	414	585.513347998944	563.850505016219	453.633214674374	472.361832706866	431.2741069578	365.789329983776	407.872289569434	416.659374620995	462.119250191051	0.296756599605103	0.130793327282842	2.26889708955384	0.023274584766696	0.889302862611622
ENSMUSG00000050248	Evc2	413	355	331	348	260	285	285	265	349.952261539166	370.67949866807	345.17837714303	342.462328712478	278.933502012507	291.201002920045	275.458773761348	266.702256701845	315.071000182311	0.271416566290438	0.119708059381017	2.26732074426627	0.023370639136615	0.889302862611622
ENSMUSG00000019842	Traf3ip2	558	428	389	457	289	368	439	415	472.816856994806	446.903733605448	405.66280576628	449.727828222995	310.045315698518	376.006909033602	424.303163793795	417.665798231191	412.891551418329	0.257454161849201	0.113653685930041	2.26525131800544	0.023497261593317	0.889302862611622
ENSMUSG00000029361	Nos1	4881	3035	3467	3961	2412	3137	3213	3214	4135.87648564811	3169.04867171153	3615.50886270358	3897.96920698312	2587.6446417468	3205.25454793046	3105.43522840425	3234.64548316879	3368.92289103708	0.252571891451396	0.111620896147379	2.26276530801107	0.023650160533491	0.889302862611622
ENSMUSG00000006567	Atp7b	404	313	302	319	253	247	311	285	342.32618320054	326.824459389031	314.936162831405	313.923801319771	271.423753881401	252.374202530706	300.588346104488	286.830728905758	301.153454770387	0.243384392318159	0.107542447439159	2.26314723268551	0.02362661475532	0.889302862611622
ENSMUSG00000040136	Abcc8	938	822	671	764	534	668	876	742	794.806831292344	858.305768746912	699.742269072426	751.842583725095	572.886500287226	682.534280528386	846.673283561195	746.766318765165	744.194729497344	0.243319072271919	0.107268298913448	2.26832227915021	0.023309570977544	0.889302862611622
ENSMUSG00000040852	Plekhh2	545	469	419	470	323	399	432	402	461.80141050568	489.714605282605	436.947855054167	462.52096119214	346.521235192461	407.681404088063	417.537509701412	404.582291298647	428.413409039397	0.231301279666951	0.10208451454755	2.26578223633725	0.023464719521463	0.889302862611622
ENSMUSG00000032648	Pygm	2369	2050	1696	1680	1382	1695	1759	1518	2007.35328713386	2140.54358385787	1768.64811974193	1653.26641447403	1482.63884531263	1731.87964894553	1700.11222121477	1527.75104027698	1751.5241451197	0.22998498266184	0.101459211061527	2.26677282679019	0.023404106904393	0.889302862611622
ENSMUSG00000005057	Sh2b2	601	458	412	456	372	376	440	390	509.252564612685	478.228761661905	429.648010220327	448.743741071523	399.089472110203	384.180972273463	425.269685806993	392.5052079763	433.364801966675	0.226733977126254	0.099785764851547	2.27220763867041	0.02307397212826	0.889302862611622
ENSMUSG00000021061	Sptb	6629	5312	4750	5225	3627	4916	5595	4913	5617.03036741679	5546.61830119659	4953.46613724891	5141.85536644453	3891.12235307447	5022.96186089453	5407.6906638412	4944.55919689118	5065.66303087603	0.207226965923379	0.091556572998467	2.26337617427914	0.023612510186024	0.889302862611622
ENSMUSG00000037326	Capn15	2260	1993	1692	1768	1388	1660	2047	1754	1914.99300503273	2081.0260305506	1764.47677983688	1739.86608380362	1489.07577228215	1696.11812227114	1978.47056101572	1765.26701228315	1803.6616708845	0.199938893810995	0.0881397415461	2.26843067955243	0.023302969625238	0.889302862611622
ENSMUSG00000074405	Zfp865	1621	1225	1126	1125	1026	1051	1250	1041	1373.54144299029	1279.10531230531	1174.23218327206	1107.09804540672	1100.71451178782	1073.86755813673	1208.15251649714	1047.68697821366	1170.54981857622	0.194389219947629	0.085820892685874	2.26505707251428	0.023509177445944	0.889302862611622
ENSMUSG00000036555	Iqce	2338	1932	1882	2018	1430	1712	2000	1921	1981.08568396748	2017.33180683581	1962.61542532683	1985.88787167178	1534.13426106879	1749.24953333023	1933.04402639542	1933.33975518583	1887.08604547277	0.184014016907389	0.080829352044561	2.27657419307212	0.022811665421909	0.889302862611622
ENSMUSG00000044340	Phlpp1	4714	3820	3710	3855	2804	3487	3952	3725	3994.37036536472	3988.72023918881	3868.91776193547	3793.65596892702	3008.19053708873	3562.86981467437	3819.69499615736	3748.92794797876	3723.1684539144	0.178336136657433	0.078650520185347	2.26745018643446	0.023362738649406	0.889302862611622
ENSMUSG00000028479	Gne	2024	1515	1597	1576	1315	1403	1536	1430	1715.0202841532	1581.91391685106	1665.4074570919	1550.92135072088	1410.75982748633	1433.52634069061	1484.57781227169	1439.18576257977	1535.16409398068	0.164084642763436	0.072510850258487	2.26289778948265	0.023641990703172	0.889302862611622
ENSMUSG00000031862	Atp13a1	2478	1970	1932	2017	1601	1762	1987	1903	2099.713569235	2057.01017570732	2014.75717413998	1984.90378452031	1717.58667970009	1800.33742857936	1920.47924022385	1915.2241302023	1938.75152278853	0.15412951134695	0.067857956102957	2.27135505102894	0.023125493130916	0.889302862611622
ENSMUSG00000038145	Snrk	5546	4757	4429	4714	3744	4448	5052	4312	4699.35894066881	4967.10528215214	4618.71610986851	4638.98683204201	4016.6424289801	4544.77916136267	4882.86921067484	4339.6986071636	4588.51957161409	0.146786971282211	0.064611219115191	2.27184958421097	0.023095596840809	0.889302862611622
ENSMUSG00000024309	Pfdn6	1627	1441	1513	1498	1701	1649	1530	1524	1378.62549521604	1504.6455143118	1577.80931908581	1474.16255290601	1824.86879585875	1684.87878531633	1478.7786801925	1533.78958193816	1557.19484060317	-0.181344699493578	0.080148631247651	-2.26260507098671	0.023660045258524	0.889302862611622
ENSMUSG00000022354	Ndufb9	3247	2945	2880	3096	3862	3164	3088	3016	2751.3195961687	3075.07358754216	3003.36473163724	3046.73382095928	4143.23532604732	3232.84201136499	2984.61997675453	3035.37360835005	3159.07033235303	-0.223549575275718	0.098804166053094	-2.26255211906337	0.023663312552439	0.889302862611622
ENSMUSG00000026049	Tex30	109	113	127	124	132	162	128	145	92.3602821011359	117.990939012653	132.440041985392	122.026806782607	141.612393329427	165.524780607183	123.714817689307	145.931423478368	130.200185623259	-0.36374356449464	0.160271198385017	-2.26955041304941	0.023234875169159	0.889302862611622
ENSMUSG00000095597	Rps7-ps3	67	66	67	51	83	72	53	83	56.7719165208817	68.9150617242046	69.8699434096163	50.1884447251045	89.044156411685	73.5665691587482	51.2256666994787	83.5331596462382	67.8893647869946	-0.468874303192306	0.206107738946188	-2.27489906778669	0.022911985290717	0.889302862611622
ENSMUSG00000084817	Gm5526	45	60	35	63	91	80	72	63	38.1303916931295	62.6500561129133	36.4992241692025	61.9974905427761	97.6267257043775	81.7406323986091	69.5895849502352	63.4046874423254	63.9548491266961	-0.590569623122103	0.25890787878996	-2.28100290297154	0.022548275098306	0.889302862611622
ENSMUSG00000045886	Gm9803	33	30	22	29	60	34	24	32	27.9622872416283	31.3250280564566	22.9423694777844	28.5385273927065	64.369269695194	34.7397687694089	23.1965283167451	32.2055555262605	33.159916809523	-0.704147604098216	0.311117330290233	-2.26328634101269	0.023618043737421	0.889302862611622
ENSMUSG00000081871	Gm11488	24	33	14	27	36	45	27	35	20.3362089030024	34.4575308621023	14.599689667681	26.5703530897612	38.6215618171164	45.9791057242176	26.0960943563382	35.2248263568474	30.2356713471333	-0.71317851407008	0.314522357824007	-2.26749703583598	0.023359879773255	0.889302862611622
ENSMUSG00000083692	Gm9575	41	81	24	58	112	88	60	55	34.7410235426291	84.5775757524329	25.0280394303103	57.077054785413	120.155970097695	89.91469563847	57.9913207918627	55.3532985607602	65.6048723249467	-0.771369303006053	0.338333268972786	-2.2799097036718	0.022613044428662	0.889302862611622
ENSMUSG00000079137	Rpl27-ps1	25	58	26	40	105	56	46	37	21.1835509406275	60.5617209091495	27.1137093828362	39.3634860589055	112.646221966589	57.2184426790264	44.4600126070947	37.2376735772387	49.9731022651835	-0.843229254111232	0.372403064608438	-2.2642919305668	0.023556165566611	0.889302862611622
ENSMUSG00000115193	Gm6533	15	40	13	45	79	48	24	28	12.7101305643765	41.7667040752755	13.5568546914181	44.2839218162687	84.7528717653387	49.0443794391654	23.1965283167451	28.1798610854779	37.1864064692582	-0.997028231813317	0.438270574143403	-2.2749148371688	0.022911039110245	0.889302862611622
ENSMUSG00000112908	Gm7392	57	95	40	131	218	157	117	130	48.2984961446307	99.1959221787793	41.7133990505172	128.915416842915	233.875013225871	160.41599108227	113.083075544132	130.835069325433	119.541547924319	-1.02154349992304	0.449373068111088	-2.27326373655867	0.023010291446645	0.889302862611622
ENSMUSG00000044757	Gm6430	9	19	3	16	23	28	14	21	7.6260783386259	19.8391844357559	3.12850492878879	15.7453944235622	24.674886716491	28.6092213395132	13.531308184768	21.1348958141085	16.7861842727017	-1.05566608201587	0.463194206322852	-2.27910035921318	0.0226611001778	0.889302862611622
ENSMUSG00000081520	Gm16200	9	10	4	11	22	20	13	13	7.6260783386259	10.4416760188189	4.17133990505172	10.824958666199	23.6020655549045	20.4351580996523	12.5647861715703	13.0835069325433	12.8436962109207	-1.05786391341614	0.465369199744322	-2.27317130999933	0.023015858489855	0.889302862611622
ENSMUSG00000087943	Gm24245	8	26	4	8	26	34	12	16	6.7787363010008	27.1483576489291	4.17133990505172	7.8726972117811	27.8933502012507	34.7397687694089	11.5982641583725	16.1027777631302	17.0381614948656	-1.19720413985332	0.525500817236463	-2.27821556234537	0.022713737521481	0.889302862611622
ENSMUSG00000105124	Gm5297	3	9	4	6	18	10	7	12	2.5420261128753	9.39750841693699	4.17133990505172	5.90452290883582	19.3107809085582	10.2175790498261	6.76565409238398	12.0770833223477	8.79831183960198	-1.28014483734756	0.563304032672909	-2.27256465975079	0.023052427336781	0.889302862611622
ENSMUSG00000094249	Gm20091	3	11	1	6	24	11	6	8	2.5420261128753	11.4858436207008	1.04283497626293	5.90452290883582	25.7477078780776	11.2393369548087	5.79913207918627	8.05138888156512	8.97659917653907	-1.49439760866658	0.660564558665957	-2.26230364475591	0.023678649398112	0.889302862611622
ENSMUSG00000109793	Gm10043	4	3	4	5	13	11	2	5	3.3893681505004	3.13250280564566	4.17133990505172	4.92043575736319	13.9466751006254	11.2393369548087	1.93304402639542	5.0321180509782	5.97060259392109	-1.5200912336449	0.668224373857913	-2.27482159153944	0.022916634444825	0.889302862611622
ENSMUSG00000090602	Gm5611	19	22	15	31	46	33	30	32	16.0994987148769	22.9716872414015	15.6425246439439	30.5067016956518	49.349773432982	33.7180108644262	28.9956603959314	32.2055555262605	28.6861765644343	-0.750308937173592	0.331773114686578	-2.26151217190217	0.023727559826999	0.889970324692211
ENSMUSG00000054945	Gm9958	33	32	36	37	39	48	33	58	27.9622872416283	33.4133632602204	37.5420591454655	36.4112246044876	41.8400253018761	49.0443794391654	31.8952264355245	58.3725693913471	39.5601418524644	-0.579053813485932	0.2562885895035	-2.25938195144667	0.023859636118119	0.891414718813004
ENSMUSG00000081400	Gm13680	59	97	42	86	130	81	60	90	49.9931802198809	101.284257382543	43.799069003043	84.6314950266468	139.466751006254	82.7623903035917	57.9913207918627	90.5781249176076	81.3133235814287	-0.628041459908195	0.2779193503932	-2.2597975240646	0.023833820151626	0.891414718813004
ENSMUSG00000070443	Gm10291	15	27	14	28	43	35	28	31	12.7101305643765	28.192525250811	14.599689667681	27.5544402412338	46.1313099482223	35.7615266743915	27.0626163695359	31.1991319160649	27.9014213290396	-0.779624586568589	0.34501806339615	-2.25966309964886	0.023842168136569	0.891414718813004
ENSMUSG00000033032	Afap1l1	724	622	509	492	433	472	551	469	613.475635240573	649.472248370534	530.803002917831	484.170878524538	464.531562966983	482.269731151794	532.553629271939	472.012673181755	528.661170203243	0.249363632455299	0.110403410584122	2.25865877816607	0.023904618508791	0.891929375456582
ENSMUSG00000103238	Gm36527	1	1	0	4	7	5	2	7	0.8473420376251	1.04416760188189	0	3.93634860589055	7.50974813110596	5.10878952491307	1.93304402639542	7.04496527136948	3.42805064989768	-2.07526249678706	0.919439296415422	-2.25709571570173	0.024002094541306	0.894398779771914
ENSMUSG00000073119	Speer4a	6	3	6	10	11	19	14	20	5.0840522257506	3.13250280564566	6.25700985757758	9.84087151472637	11.8010327774522	19.4134001946697	13.531308184768	20.1284722039128	11.1485812205629	-1.17800793359324	0.522331044662832	-2.2552899078661	0.024115137682481	0.897441080863279
ENSMUSG00000107951	Gm6210	343	557	228	479	795	695	473	517	290.638318905409	581.601354248211	237.766374587948	471.377745555393	852.89282346132	710.121743962916	457.164912242518	520.321006471146	515.235534929358	-0.768473965321068	0.340937959962898	-2.25399942383857	0.024196204221612	0.899287012819086
ENSMUSG00000029163	Emilin1	215	162	91	84	84	58	75	78	182.178538089397	169.155151504866	94.8979828399266	82.6633207237015	90.1169775732715	59.2619584889916	72.4891509898284	78.50104159526	103.658015225655	0.665422365142118	0.295309618564883	2.25330406905089	0.024239983378482	0.899744110312196
ENSMUSG00000075245	Gm6043	6	10	5	16	28	23	17	14	5.0840522257506	10.4416760188189	5.21417488131465	15.7453944235622	30.0389925244238	23.5004318146001	16.4308742243611	14.089930542739	15.0681908319463	-1.09240516791436	0.484973188713019	-2.25250631032468	0.024290294394638	0.90044215835687
ENSMUSG00000031590	Frg1	837	692	690	773	784	826	774	783	709.225285492209	722.563980502266	719.556133621421	760.699368088349	841.091790683868	843.972029515639	748.088038215029	788.029686783187	766.653289112746	-0.171363682581824	0.076149780864015	-2.25035030485299	0.024426716963589	0.900825803272706
ENSMUSG00000083283	Gm15361	27	24	12	29	42	41	27	28	22.8782350158777	25.0600224451653	12.5140197151552	28.5385273927065	45.0584887866358	41.8920741042872	26.0960943563382	28.1798610854779	28.7771653627055	-0.733051927969152	0.325708181978635	-2.25064020042713	0.024408335091077	0.900825803272706
ENSMUSG00000114737	Gm8483	31	65	16	44	79	65	30	44	26.2676031663781	67.8708941223227	16.6853596202069	43.299834664796	84.7528717653387	66.4142638238699	28.9956603959314	44.2826388486082	47.3211408009315	-0.833509249154741	0.370211480165474	-2.25144084884182	0.024357629359556	0.900825803272706
ENSMUSG00000081416	Gm14383	1	5	2	3	17	6	6	7	0.8473420376251	5.22083800940944	2.08566995252586	2.95226145441791	18.2379597469716	6.13054742989568	5.79913207918627	7.04496527136948	6.03983949767517	-1.64139210425385	0.729112659149166	-2.25121877073053	0.024371684593824	0.900825803272706
ENSMUSG00000050440	Hamp	11	2	0	1	0	0	2	0	9.3207624138761	2.08833520376378	0	0.984087151472637	0	0	1.93304402639542	0	1.79077859943849	3.93605210501461	1.75109158567923	2.24777055478104	0.024590824375826	0.901236221439336
ENSMUSG00000006342	Susd2	1978	1447	1575	1606	1202	1383	1432	1396	1676.04255042245	1510.91051992309	1642.46508761411	1580.44396526506	1289.53103622705	1413.09118259095	1384.05952289912	1404.96735983311	1487.68890309687	0.18711873695942	0.083214562149552	2.24862971246708	0.024536064412752	0.901236221439336
ENSMUSG00000032330	Cox7a2	2795	2301	2404	2444	3075	2632	2405	2372	2368.32099516215	2402.62965193022	2506.97528293608	2405.10899819913	3298.92507187869	2689.26680591424	2324.4854417405	2387.23680338406	2547.86863139313	-0.217098639776149	0.096608369537612	-2.2472032269588	0.024627042053956	0.901236221439336
ENSMUSG00000107369	Gstm2-ps1	52	56	39	48	85	63	44	50	44.0617859565052	58.4733857053857	40.6705640742542	47.2361832706866	91.1897987348581	64.3707480139046	42.5269685806993	50.321180509782	54.8563268557595	-0.557676861677365	0.248145260815018	-2.24738066665351	0.024615709506305	0.901236221439336
ENSMUSG00000056904	Gm5620	52	109	38	78	150	103	85	81	44.0617859565052	113.814268605126	39.6277290979913	76.7587978148657	160.923174237985	105.241064213209	82.1543711218055	81.5203124258469	88.0126879341668	-0.702690772687744	0.312396848900506	-2.24935294693558	0.024490049699241	0.901236221439336
ENSMUSG00000105733	Gm42973	9	4	13	8	15	20	8	15	7.6260783386259	4.17667040752755	13.5568546914181	7.8726972117811	16.0923174237985	20.4351580996523	7.73217610558169	15.0963541529346	11.573538303915	-1.07371468770375	0.477550737545844	-2.24837824190497	0.024552081394582	0.901236221439336
ENSMUSG00000078937	Cpt1b	25	27	25	21	9	12	13	12	21.1835509406275	28.192525250811	26.0708744065732	20.6658301809254	9.65539045427909	12.2610948597914	12.5647861715703	12.0770833223477	17.8338919483657	0.933575080033761	0.41805390309113	2.23314523110733	0.025539368672585	0.902323985371911
ENSMUSG00000022766	Serpind1	174	131	56	80	64	53	52	47	147.437514546767	136.785955846527	58.398758670724	78.726972117811	68.6605543415402	54.1531689640785	50.259144686281	47.3019096791951	80.2154973566156	0.737365978472051	0.32972794873593	2.23628594815475	0.025333046308984	0.902323985371911
ENSMUSG00000091562	NA	42	36	37	32	13	26	44	28	35.5883655802542	37.590033667748	38.5848941217284	31.4907888471244	13.9466751006254	26.565705529548	42.5269685806993	28.1798610854779	31.8091615641507	0.692527266668072	0.309228153407628	2.23953498100535	0.025121127879676	0.902323985371911
ENSMUSG00000097559	D430018E03Rik	67	57	34	41	25	28	46	36	56.7719165208817	59.5175533072676	35.4563891929396	40.3475732103781	26.8205290396641	28.6092213395132	44.4600126070947	36.2312499670431	41.0268056480978	0.631526918409765	0.281262664080376	2.24532794096444	0.024747087592711	0.902323985371911
ENSMUSG00000067158	Col4a4	144	147	85	102	64	86	86	76	122.017253418014	153.492637476637	88.640972982349	100.376889450209	68.6605543415402	87.8711798285048	83.1208931350032	76.4881943748687	97.5835718758909	0.495013686892189	0.221763675150641	2.23216758360418	0.025603889021959	0.902323985371911
ENSMUSG00000039994	Timeless	293	194	220	244	172	154	155	151	248.271217024154	202.568514765086	229.423694777844	240.117264959324	184.525239792889	157.350717367322	149.810912045645	151.969965139542	195.504690733976	0.380442558481295	0.170019607693934	2.23763931490867	0.025244585580806	0.902323985371911
ENSMUSG00000047959	Kcna3	676	492	379	540	306	380	517	487	572.803217434568	513.730460125889	395.23445600365	531.407061795224	328.283275445489	388.268003893393	499.691880823217	490.128298165277	464.943331710838	0.321475565435875	0.144018709787282	2.23217917943231	0.025603122923795	0.902323985371911
ENSMUSG00000066571	4931406P16Rik	1174	976	806	998	598	820	965	908	994.779552171868	1019.10757943672	840.524990867921	982.118977169692	641.547054628766	837.841482085743	932.693742735792	913.832638057642	895.305752144268	0.257439028644403	0.114948003519915	2.23961287504922	0.025116066128781	0.902323985371911
ENSMUSG00000020427	Igfbp3	532	438	421	450	362	354	381	346	450.785964016553	457.345409624267	439.033525006693	442.839218162687	388.361260494337	361.702298363845	368.244887028328	348.222569127692	407.06689147805	0.238071375967756	0.106148632989425	2.24281151120875	0.024908971856164	0.902323985371911
ENSMUSG00000027007	Itprid2	2038	2022	1734	1913	1304	1647	1783	1691	1726.88307267995	2111.30689100518	1808.27584883992	1882.55872076716	1398.95879470888	1682.83526950636	1723.30874953152	1701.86232484083	1754.49870898498	0.214137494520465	0.095581303876648	2.24037009159051	0.025066906286073	0.902323985371911
ENSMUSG00000063952	Brpf3	1414	1197	1003	1219	856	1013	1200	1097	1198.14164120189	1249.86861945262	1045.96348119172	1199.60223764514	918.3349143181	1035.04075774739	1159.82641583725	1104.04670038462	1113.85309597234	0.199766567199694	0.089272422538875	2.2377186763662	0.025239406550529	0.902323985371911
ENSMUSG00000029475	Kdm2b	852	677	658	772	545	615	752	676	721.935416056585	706.901466474038	686.185414381008	759.715280936876	584.687533064678	628.381111564307	726.824553924679	680.342360492253	686.871642111803	0.190374654421406	0.08515748824284	2.23555976520259	0.025380622631342	0.902323985371911
ENSMUSG00000033335	Dnm2	2580	2187	1968	2114	1574	1801	2042	2035	2186.14245707276	2283.59454531569	2052.29923328545	2080.36023821316	1688.62050833725	1840.18598687369	1973.63795094973	2048.07204674813	2019.11412084948	0.186056731543791	0.083333549565473	2.23267498521242	0.025570385213716	0.902323985371911
ENSMUSG00000045980	Tmem104	996	736	767	882	659	707	809	720	843.9526694746	768.507354985069	799.854426793667	867.964867598866	706.989145485547	722.382838822708	781.916308676949	724.624999340861	777.024076397283	0.178737650026046	0.079667077390214	2.2435572620617	0.024860901667259	0.902323985371911
ENSMUSG00000042328	Hps4	1012	809	824	804	693	690	857	771	857.510142076601	844.731589922447	859.296020440654	791.206069784	743.46506497949	705.012954438003	828.309365310439	775.952603460839	800.685476301559	0.173475494725732	0.077658565336193	2.23382306864331	0.025494717050452	0.902323985371911
ENSMUSG00000001158	Snrnp27	1023	837	997	1019	1179	1062	1086	1034	866.830904490477	873.96828277514	1039.70647133414	1002.78480735062	1264.85614951056	1085.10689509154	1049.64290633272	1040.64201294229	1027.94230372844	-0.225641688004203	0.100844784088823	-2.2375147117719	0.025252718882759	0.902323985371911
ENSMUSG00000041841	Rpl37	5861	4630	5006	5330	6782	5522	5387	5008	4966.27168252071	4834.49599671314	5220.43189117222	5245.18451734916	7275.87311788009	5642.14715131399	5206.65408509607	5040.16943985977	5428.90348523814	-0.232534278675377	0.104039464393424	-2.23505839857125	0.025413515075678	0.902323985371911
ENSMUSG00000044285	Ubb-ps	1591	1496	1029	1502	1845	1558	1409	1415	1348.12118186153	1562.0747324153	1073.07719057455	1478.0989015119	1979.35504312721	1591.89881596291	1361.82951659558	1424.08940842683	1477.31809880948	-0.286838370255163	0.128191417671241	-2.23757857948641	0.025248549720428	0.902323985371911
ENSMUSG00000095159	Tubb4b-ps1	141	216	89	149	258	232	170	147	119.475227305139	225.540202006488	92.8123128874007	146.628985569423	276.787859689334	237.047833955966	164.308742243611	147.944270698759	176.318179294515	-0.55925100922882	0.249204088102049	-2.24414861524987	0.024822840895045	0.902323985371911
ENSMUSG00000059179	Gm8991	30	31	23	37	36	53	28	41	25.420261128753	32.3691956583385	23.9852044540474	36.4112246044876	38.6215618171164	54.1531689640785	27.0626163695359	41.2633680180213	34.9108251267973	-0.624088288454191	0.278674373970071	-2.23948933503738	0.025124094479846	0.902323985371911
ENSMUSG00000080242	Atp6v0c-ps2	339	481	246	408	689	572	483	451	287.248950754909	502.244616505188	256.537404160681	401.507557800836	739.173780333144	584.445521650055	466.830132374495	453.897048198234	461.485626472193	-0.630086898882613	0.281812107146472	-2.23584041602274	0.025362226461602	0.902323985371911
ENSMUSG00000091223	Gm8775	32	56	16	36	73	48	37	48	27.1149452040032	58.4733857053857	16.6853596202069	35.4271374530149	78.3159447958193	49.0443794391654	35.7613144883153	48.3083332893907	43.6413499994127	-0.756654360625077	0.33858934803505	-2.23472582648037	0.025435354000933	0.902323985371911
ENSMUSG00000091957	Rps2-ps10	31	61	30	32	99	48	45	45	26.2676031663781	63.6942237147952	31.2850492878879	31.4907888471244	106.20929499707	49.0443794391654	43.493490593897	45.2890624588038	49.5967365631402	-0.770439102148872	0.345096515703485	-2.23253225428347	0.025579805923471	0.902323985371911
ENSMUSG00000086188	Gm15169	18	11	17	16	23	32	15	21	15.2521566772518	11.4858436207008	17.7281945964698	15.7453944235622	24.674886716491	32.6962529594436	14.4978301979657	21.1348958141085	19.1519318757492	-0.807693133957872	0.361145634570621	-2.23647486399266	0.025320682029771	0.902323985371911
ENSMUSG00000096361	Gm5814	159	183	73	179	352	248	159	162	134.727383982391	191.082671144385	76.1269532671938	176.151600113602	377.633048878471	253.395960435688	153.677000098436	163.040624851694	190.729405346483	-0.854465897177312	0.380931563405499	-2.24309555642607	0.024890653166627	0.902323985371911
ENSMUSG00000061833	Gm6311	3	8	2	3	13	10	5	9	2.5420261128753	8.3533408150551	2.08566995252586	2.95226145441791	13.9466751006254	10.2175790498261	4.83261006598856	9.05781249176076	6.74849688038437	-1.42565687396265	0.63672542167014	-2.23904500345397	0.025152988106676	0.902323985371911
ENSMUSG00000082740	Gm14127	3	5	2	3	10	10	6	9	2.5420261128753	5.22083800940944	2.08566995252586	2.95226145441791	10.7282116158657	10.2175790498261	5.79913207918627	9.05781249176076	6.07544134573342	-1.43183511902668	0.641177854385391	-2.23313252201947	0.025540206512141	0.902323985371911
ENSMUSG00000103030	E330011M16Rik	2	2	2	1	5	9	1	4	1.6946840752502	2.08833520376378	2.08566995252586	0.984087151472637	5.36410580793283	9.19582114484352	0.966522013197712	4.02569444078256	3.30061497372114	-1.99219391399409	0.890410937764418	-2.23738706421998	0.0252610532565	0.902323985371911
ENSMUSG00000101793	Gm28500	3	0	0	1	2	7	0	6	2.5420261128753	0	0	0.984087151472637	2.14564232317313	7.15230533487829	0	6.03854166117384	2.35782532294665	-2.77382813776807	1.23591442806595	-2.24435290565284	0.024809704055769	0.902323985371911
ENSMUSG00000083482	Gm14706	0	0	0	0	4	4	2	3	0	0	0	0	4.29128464634626	4.08703161993045	1.93304402639542	3.01927083058692	1.66632889040738	-3.25091242847419	1.45083951807244	-2.24071124888664	0.02504478498333	0.902323985371911
ENSMUSG00000054988	Agtr1b	12	9	8	2	4	0	10	2	10.1681044515012	9.39750841693699	8.34267981010344	1.96817430294527	4.29128464634626	0	9.66522013197712	2.01284722039128	5.7307273725252	1.92959450762545	0.866830305071728	2.22603489556792	0.026011844129026	0.905724764117779
ENSMUSG00000019846	Lama4	304	208	178	194	148	173	193	159	257.59197943803	217.186861191433	185.624625774801	190.912907385692	158.777531914812	176.764117561992	186.538748547158	160.021354021107	191.677265729378	0.331876202969239	0.149165671876028	2.22488323751233	0.026089077590956	0.905724764117779
ENSMUSG00000014503	Pkd2l2	981	676	916	869	624	731	869	725	831.242538910223	705.857298872156	955.236838256843	855.171734629722	669.440404830017	746.90502854229	839.907629468812	729.657117391839	791.677323862738	0.227196189876157	0.101939517548283	2.22873518867252	0.025831529477061	0.905724764117779
ENSMUSG00000030306	Tmtc1	3526	2736	2684	3087	2075	2619	2962	2766	2987.7280246661	2856.84255874884	2798.9690762897	3037.87703659603	2226.10391029212	2675.98395314946	2862.83820309162	2783.76770580114	2778.76380857938	0.183070804038716	0.082296148270083	2.2245367236132	0.02611235455838	0.905724764117779
ENSMUSG00000014426	Map3k4	3069	2474	2520	2572	1865	2223	2682	2548	2600.49271347143	2583.27064705579	2627.94414018258	2531.07215358762	2000.81146635895	2271.36782277635	2592.21203939626	2564.36735877849	2471.44229270093	0.182690279915156	0.082050122265844	2.22656925876643	0.025976075401465	0.905724764117779
ENSMUSG00000035829	Ppp1r26	1852	1463	1476	1559	1265	1428	1649	1395	1569.27745368169	1527.6172015532	1539.22442496408	1534.19186914584	1357.11876940701	1459.07028831517	1593.79479976303	1403.96093622292	1498.03196788162	0.14257356896465	0.064013473087207	2.22724314255561	0.025931028203426	0.905724764117779
ENSMUSG00000073676	Hspe1	2731	2140	2380	2409	2900	2716	2303	2229	2314.09110475415	2234.51866802724	2481.94724350577	2370.66594789758	3111.18136860104	2775.09446993278	2225.90019639433	2243.31822712608	2469.58965327987	-0.220563842609816	0.099046724812751	-2.22686659278027	0.02595619114206	0.905724764117779
ENSMUSG00000091449	Gm10269	113	201	81	171	324	234	176	190	95.7496502516363	209.877687978259	84.4696330772973	168.278902901821	347.594056354047	239.091349765932	170.107874322797	191.220485937172	188.29870507362	-0.832061248672075	0.373926866149244	-2.22519782341603	0.026067960912739	0.905724764117779
ENSMUSG00000113263	Gm4811	12	18	5	15	28	23	20	24	10.1681044515012	18.795016833874	5.21417488131465	14.7613072720896	30.0389925244238	23.5004318146001	19.3304402639542	24.1541666446954	18.2453293358066	-0.924302329275238	0.414540985041414	-2.22970071145775	0.025767318629079	0.905724764117779
ENSMUSG00000062742	Gm5239	11	24	13	36	50	40	19	22	9.3207624138761	25.0600224451653	13.5568546914181	35.4271374530149	53.6410580793283	40.8703161993045	18.3639182507565	22.1413194243041	27.297673619646	-0.938346197834155	0.420900162363726	-2.22937951024897	0.025788664362007	0.905724764117779
ENSMUSG00000106106	CT010467.1	1052	2117	517	896	3783	2528	1901	2006	891.403823581605	2210.50281318396	539.145682727935	881.742087719483	4058.48245428198	2583.00398379605	1837.35834708885	2018.88576205245	1877.56561930404	-1.1823562697389	0.530605281028828	-2.22831606094525	0.025859446067681	0.905724764117779
ENSMUSG00000115604	Gm7691	2	3	1	4	7	13	4	5	1.6946840752502	3.13250280564566	1.04283497626293	3.93634860589055	7.50974813110596	13.282852764774	3.86608805279085	5.0321180509782	4.93714718283729	-1.65804609975386	0.744976231988429	-2.22563623986814	0.026038556714564	0.905724764117779
ENSMUSG00000108597	Gm44708	0	0	4	3	6	8	0	6	0	0	4.17133990505172	2.95226145441791	6.4369269695194	8.17406323986091	0	6.03854166117384	3.47164165375297	-2.30694939199614	1.03513707227651	-2.22864145607559	0.025837770404781	0.905724764117779
ENSMUSG00000070867	Trabd2b	65	72	35	48	38	23	27	18	55.0772324456315	75.1800673354959	36.4992241692025	47.2361832706866	40.7672041402895	23.5004318146001	26.0960943563382	18.1156249835215	40.3090078144707	0.809947737011692	0.364395323725077	2.22271715435835	0.026234878430876	0.906673591817235
ENSMUSG00000002602	Axl	2384	1946	1764	1892	1597	1708	1888	1697	2020.06341769824	2031.95015326215	1839.56089812781	1861.89289058623	1713.29539505375	1745.1625017103	1824.79356091728	1707.900866502	1843.07746048222	0.15383393937907	0.069180603631667	2.223657084551	0.026171524692416	0.906673591817235
ENSMUSG00000014313	Cox6c	5185	4804	4880	5287	6280	5529	5035	4819	4393.46846508614	5016.18115944059	5089.0346841631	5202.86876983583	6737.31689476363	5649.29945664887	4866.43833645048	4849.95537753279	5225.57039299018	-0.225671416641214	0.101510806159668	-2.22312702636065	0.026207235714073	0.906673591817235
ENSMUSG00000056569	Mpz	11	9	0	1	0	0	2	1	9.3207624138761	9.39750841693699	0	0.984087151472637	0	0	1.93304402639542	1.00642361019564	2.8302282023596	3.55468844716595	1.60641024856522	2.212814846233	0.026910413312087	0.907179935674629
ENSMUSG00000038086	Hspb2	21	13	12	16	9	5	9	3	17.7941827901271	13.5741788244645	12.5140197151552	15.7453944235622	9.65539045427909	5.10878952491307	8.69869811877941	3.01927083058692	10.7637405852334	1.21948179566357	0.551120263204728	2.21273264127935	0.026916083602816	0.907179935674629
ENSMUSG00000108425	Gm44706	15	19	11	9	3	7	19	8	12.7101305643765	19.8391844357559	11.4711847388922	8.85678436325374	3.2184634847597	7.15230533487829	18.3639182507565	8.05138888156512	11.2079200067797	1.20470818729264	0.543160424312426	2.21796017045545	0.026557548252847	0.907179935674629
ENSMUSG00000067780	Pi15	97	69	80	72	50	46	68	62	82.1921776496347	72.0475645298502	83.4267981010344	70.8542749060299	53.6410580793283	47.0008636292002	65.7234968974444	62.3982638321297	67.1605622030815	0.461974230551067	0.208508246176491	2.21561611601697	0.026717804180076	0.907179935674629
ENSMUSG00000037762	Slc16a9	289	227	174	194	161	146	199	177	244.881848873654	237.026045627188	181.45328586975	190.912907385692	172.724207015437	149.176654127462	192.337880626345	178.136979004628	193.331226066269	0.330382361902577	0.148882585756664	2.21907995635271	0.026481285397252	0.907179935674629
ENSMUSG00000025316	Banp	930	1096	1167	1000	648	737	1105	1027	788.028094991343	1144.40769166255	1216.98841729884	984.087151472637	695.188112708095	753.035575972186	1068.00682458347	1033.59704767092	960.417364545005	0.329537070493148	0.148925928305175	2.21275820969113	0.026914319847633	0.907179935674629
ENSMUSG00000051855	Mest	969	740	807	803	567	723	834	750	821.074434458722	772.684025392597	841.567825844184	790.221982632528	608.289598619583	738.73096530243	806.079359006892	754.81770764673	766.683237362958	0.202154011112465	0.091218022542296	2.21616305065953	0.026680337399646	0.907179935674629
ENSMUSG00000020171	Yeats4	970	771	852	909	994	901	907	933	821.921776496347	805.053221050935	888.495399776016	894.535220688627	1066.38423461705	920.603872389335	876.635465970325	938.993228312533	901.577802412645	-0.185826302564546	0.083814189738108	-2.21712222172871	0.026614740662838	0.907179935674629
ENSMUSG00000025794	Rpl14	9442	7364	8485	8629	10629	8604	8258	8402	8000.60351925619	7689.25022025822	8848.45477359096	8491.68803005739	11403.0161265036	8791.20501447041	7981.5387849867	8455.97117286377	8707.71595524841	-0.219432777211275	0.098853734733473	-2.21977225041526	0.026434231512796	0.907179935674629
ENSMUSG00000100826	Snhg14	4007	3363	3578	4102	3363	4522	4159	4911	3395.29954476378	3511.53564512879	3731.26354506876	4036.72549534076	3607.89756641562	4620.38924633138	4019.76505288928	4942.54634967079	3983.17780570114	-0.231872858022807	0.104614959677182	-2.21644073408156	0.026661332566632	0.907179935674629
ENSMUSG00000109609	Gm4972	15	23	11	25	30	30	21	32	12.7101305643765	24.0158548432834	11.4711847388922	24.6021787868159	32.184634847597	30.6527371494784	20.2969622771519	32.2055555262605	23.517404841732	-0.771749285701766	0.348725470508055	-2.21305683401161	0.026893727590416	0.907179935674629
ENSMUSG00000084168	Atp5l2-ps	39	78	32	61	133	84	62	46	33.0463394673789	81.4450729467872	33.3707192404137	60.0293162398309	142.685214491013	85.8276640185395	59.9243648182581	46.2954860689995	67.8280221614026	-0.775241226896141	0.349010472979942	-2.22125491042412	0.026333700950492	0.907179935674629
ENSMUSG00000113198	Gm6988	90	139	53	140	265	193	144	139	76.260783386259	145.139296661582	55.2702537419353	137.772201206169	284.29760782044	197.199275661644	139.17916990047	139.892881817194	146.876433774462	-0.903661756936523	0.408345117235517	-2.21298533714394	0.02689865656576	0.907179935674629
ENSMUSG00000111446	Gm6581	13	18	13	19	48	29	26	17	11.0154464891263	18.795016833874	13.5568546914181	18.6976558779801	51.4954157561552	29.6309792444958	25.1295723431405	17.1092013733259	23.1787678261895	-0.908840809037704	0.40930793531541	-2.22043290789698	0.026389395283089	0.907179935674629
ENSMUSG00000083076	Gm11408	68	110	59	151	234	211	172	162	57.6192585585068	114.858436207008	61.5272635995128	148.597159872368	251.040151811256	215.590917951331	166.241786270006	163.040624851694	147.31444989021	-0.935516891175744	0.421424935356715	-2.21988974236628	0.026426252987035	0.907179935674629
ENSMUSG00000025201	Bloc1s2-ps	5	11	8	7	22	17	9	10	4.2367101881255	11.4858436207008	8.34267981010344	6.88861006030846	23.6020655549045	17.3698843847044	8.69869811877941	10.0642361019564	11.3360909799479	-1.11059486345749	0.50077470194266	-2.21775353097739	0.026571642120325	0.907179935674629
ENSMUSG00000103808	Gm37060	4	2	3	4	12	5	4	10	3.3893681505004	2.08833520376378	3.12850492878879	3.93634860589055	12.8738539390388	5.10878952491307	3.86608805279085	10.0642361019564	5.55694056345533	-1.50245399196428	0.676704537440414	-2.22025109754281	0.026401727480057	0.907179935674629
ENSMUSG00000114252	Gm5630	4	4	3	3	14	6	3	7	3.3893681505004	4.17667040752755	3.12850492878879	2.95226145441791	15.0194962622119	6.13054742989568	2.89956603959314	7.04496527136948	5.59267249303811	-1.50255081179779	0.678339890858886	-2.21504120875941	0.026757236149602	0.907179935674629
ENSMUSG00000074108	Rpl10-ps2	0	2	1	4	9	6	2	5	0	2.08833520376378	1.04283497626293	3.93634860589055	9.65539045427909	6.13054742989568	1.93304402639542	5.0321180509782	3.72732734343321	-1.96612990490682	0.887633345146627	-2.21502483616368	0.026758359855372	0.907179935674629
ENSMUSG00000110622	Iqcn	0	0	0	1	1	5	0	3	0	0	0	0.984087151472637	1.07282116158657	5.10878952491307	0	3.01927083058692	1.2731210835699	-3.52318476485189	1.59117725510493	-2.21420005442421	0.026815020133874	0.907179935674629
ENSMUSG00000100786	Gm28940	1	0	0	0	3	1	0	5	0.8473420376251	0	0	0	3.2184634847597	1.02175790498261	0	5.0321180509782	1.2649601847932	-3.53196288678485	1.59509592025967	-2.21426363262835	0.026810648800734	0.907179935674629
ENSMUSG00000040283	Btnl9	10	16	17	10	8	2	5	1	8.473420376251	16.7066816301102	17.7281945964698	9.84087151472637	8.58256929269253	2.04351580996523	4.83261006598856	1.00642361019564	8.65178586204992	1.58010854844202	0.715995757658195	2.20686859040908	0.027323241371691	0.908048196375884
ENSMUSG00000013584	Aldh1a2	469	399	163	146	127	81	105	101	397.403415646172	416.622873150873	169.982101130858	143.676724115005	136.248287521494	82.7623903035917	101.48481138576	101.64878462976	193.728673485439	1.20207609547984	0.544255245600742	2.20866239727833	0.027198131751817	0.908048196375884
ENSMUSG00000035403	Crb2	454	494	258	371	252	217	326	337	384.693285081795	515.818795329653	269.051423875836	365.096333196348	270.350932719815	221.721465381227	315.086176302454	339.164756635931	335.122896065382	0.416665199916277	0.189543452466598	2.19825688776933	0.027930804793286	0.908048196375884
ENSMUSG00000032796	Lama1	497	359	324	389	214	274	339	369	421.128992699675	374.856169075598	337.878532309189	382.809901922856	229.583728579525	279.961665965236	327.650962474024	371.370312162191	340.655033148537	0.3287011598291	0.149233879227753	2.2025907356295	0.027623607479788	0.908048196375884
ENSMUSG00000029913	Prdm5	191	173	153	172	132	143	202	131	161.842329186394	180.640995125567	159.553751368228	169.262990053294	141.612393329427	146.111380412514	195.237446665938	131.841492935629	160.762847384624	0.309170332840701	0.140125967948059	2.20637428856372	0.027357803756683	0.908048196375884
ENSMUSG00000014329	Bicc1	445	394	328	359	281	283	324	312	377.06720674317	411.402035141464	342.049872214241	353.287287378677	301.462746405825	289.15748711008	313.153132276059	314.00416638104	337.697991706319	0.253039917437177	0.114983099724551	2.200670516305	0.027759357515492	0.908048196375884
ENSMUSG00000047248	C2cd3	1588	1294	1157	1382	821	1085	1324	1305	1345.57915574866	1351.15287683516	1206.56006753621	1360.00844333518	880.786173662571	1108.60732690614	1279.67514547377	1313.38281130531	1230.71900010038	0.248924744091881	0.113063135402536	2.20164373830285	0.027690483796805	0.908048196375884
ENSMUSG00000071984	Fndc1	423	310	320	357	257	255	342	322	358.425681915417	323.691956583385	333.707192404137	351.319113075731	275.715038527747	260.548265770566	330.550528513617	324.068402482996	319.7532724092	0.24394970507235	0.11097326793318	2.19827449993849	0.027929550449307	0.908048196375884
ENSMUSG00000032175	Tyk2	794	687	654	635	497	542	703	656	672.789577874329	717.343142492857	682.014074475956	624.895341185125	533.192117308523	553.792784500577	679.464975277991	660.21388828834	640.463237675462	0.212661253254075	0.096468335203129	2.20446691451952	0.027491524276289	0.908048196375884
ENSMUSG00000044433	Camsap3	1550	1261	1159	1144	876	1034	1188	1168	1313.38015831891	1316.69534597306	1208.64573748874	1125.7957012847	939.791337549832	1056.49767375202	1148.22815167888	1175.50277670851	1160.56711034433	0.209304345803978	0.095230628852929	2.19786793729171	0.027958518344732	0.908048196375884
ENSMUSG00000054874	Pcnx3	3337	2813	2337	2537	1898	2241	2684	2560	2827.58037955496	2937.24346409375	2437.10533952647	2496.62910328608	2036.2145646913	2289.75946506604	2594.14508342266	2576.44444210084	2524.39023021776	0.208390171163689	0.094750094560635	2.19936636612358	0.027851882180185	0.908048196375884
ENSMUSG00000059851	Kmt5c	1217	1046	927	964	770	858	918	877	1031.21525978975	1092.19931156845	966.708022995736	948.660014019622	826.072294421656	876.668282475082	887.267208115499	882.633506141577	938.927987440922	0.192868374660702	0.087559195299573	2.20271981715716	0.027614502625415	0.908048196375884
ENSMUSG00000033295	Ptprf	5983	5232	4774	5188	3745	4380	5134	5029	5069.64741111097	5463.08489304604	4978.49417667923	5105.44414184004	4017.71525014169	4475.29962382385	4962.12401575705	5061.30433567388	4891.63923100909	0.179055143074829	0.081143547507065	2.20664672146899	0.027338750144118	0.908048196375884
ENSMUSG00000040797	Iqsec3	10026	7746	7511	8433	5956	7479	8309	7691	8495.45126922925	8088.1222441771	7832.73350671086	8298.80694836875	6389.72283840959	7641.72737136497	8030.83140765979	7740.40398601467	7814.72494649187	0.167192574640151	0.075876376487311	2.20348654456517	0.027560474310094	0.908048196375884
ENSMUSG00000047843	Bri3	671	575	557	551	757	652	631	579	568.566507246442	600.396371082085	580.859081778452	542.232020461423	812.12561932103	666.186154048664	609.875390327756	582.719270303276	620.370051821141	-0.242751813617377	0.110027493615612	-2.20628322649469	0.027364175076921	0.908048196375884
ENSMUSG00000024208	Uqcc2	1712	1672	1430	1400	2044	1670	1669	1575	1450.64956841417	1745.84823034652	1491.25401605599	1377.72201206169	2192.84645428294	1706.33570132096	1613.12524002698	1585.11718605813	1645.36230107092	-0.251366134504995	0.113883504763527	-2.20722162552816	0.027298579653943	0.908048196375884
ENSMUSG00000097961	Gm27000	182	246	122	221	218	271	215	263	154.216250847768	256.865230062944	127.225867104077	217.483260475453	233.875013225871	276.896392250288	207.802232837508	264.689409481453	217.381707035671	-0.425060217799226	0.192227515395935	-2.21123504053891	0.027019565051313	0.908048196375884
ENSMUSG00000067736	Gm10222	126	163	70	165	206	194	181	171	106.765096740763	170.199319106748	72.9984483384051	162.374379992985	221.001159286833	198.221033566627	174.940484388786	172.098437343455	159.824794845575	-0.520151577441695	0.235692294062829	-2.20690956193518	0.027320378267865	0.908048196375884
ENSMUSG00000058126	Tpm3-rs7	72	87	46	83	133	95	77	73	61.0086267090072	90.8425813637242	47.9704089080948	81.6792335722289	142.685214491013	97.0670009733483	74.4221950162238	73.4689235442818	83.6430230722403	-0.551794705043915	0.25037446579499	-2.20387771289638	0.027532945332195	0.908048196375884
ENSMUSG00000087298	Gm9392	32	33	26	43	52	45	29	42	27.1149452040032	34.4575308621023	27.1137093828362	42.3157475133234	55.7867004025014	45.9791057242176	28.0291383827336	42.2697916282169	37.8833336374918	-0.594984302231014	0.270657504601418	-2.1982922775676	0.02792828437047	0.908048196375884
ENSMUSG00000046440	Gm5564	31	44	30	30	50	62	46	44	26.2676031663781	45.9433744828031	31.2850492878879	29.5226145441791	53.6410580793283	63.348990108922	44.4600126070947	44.2826388486082	42.3439176406502	-0.603311465843951	0.273865997931925	-2.20294403248232	0.027598693595758	0.908048196375884
ENSMUSG00000081604	Gm11518	28	32	22	24	56	42	42	35	23.7255770535028	33.4133632602204	22.9423694777844	23.6180916353433	60.0779850488477	42.9138320092698	40.5939245543039	35.2248263568474	35.313746174515	-0.674130333314716	0.304796441020652	-2.21173951722435	0.026984668349466	0.908048196375884
ENSMUSG00000083392	Gm6335	27	27	13	31	46	52	36	28	22.8782350158777	28.192525250811	13.5568546914181	30.5067016956518	49.349773432982	53.1314110590959	34.7947924751176	28.1798610854779	32.573769338304	-0.742535716722048	0.335987742663006	-2.2100083498189	0.027104582805075	0.908048196375884
ENSMUSG00000112637	Gm48225	9	9	11	16	26	21	14	16	7.6260783386259	9.39750841693699	11.4711847388922	15.7453944235622	27.8933502012507	21.4569160046349	13.531308184768	16.1027777631302	15.4030647589751	-0.919147689471764	0.417544401058145	-2.20131724229196	0.027713573071729	0.908048196375884
ENSMUSG00000081642	Gm13532	70	97	53	156	239	167	113	120	59.313942633757	101.284257382543	55.2702537419353	153.517595629731	256.404257619189	170.633570132096	109.216987491341	120.770833223477	128.301462231759	-0.931909513958329	0.423392557342808	-2.20105313094531	0.027732262748507	0.908048196375884
ENSMUSG00000045694	Gm4997	18	34	9	24	40	32	9	30	15.2521566772518	35.5016984639842	9.38551478636636	23.6180916353433	42.9128464634626	32.6962529594436	8.69869811877941	30.1927083058692	24.7822459263126	-0.935602352471717	0.425334308237131	-2.19968700937735	0.027829109103641	0.908048196375884
ENSMUSG00000110887	Cbx3-ps8	6	17	7	10	24	22	10	13	5.0840522257506	17.7508492319921	7.29984483384051	9.84087151472637	25.7477078780776	22.4786739096175	9.66522013197712	13.0835069325433	13.8688408323156	-1.05194168904374	0.475885099768579	-2.21049511647937	0.027070819073521	0.908048196375884
ENSMUSG00000069236	Gm7251	6	11	4	7	16	10	6	17	5.0840522257506	11.4858436207008	4.17133990505172	6.88861006030846	17.1651385853851	10.2175790498261	5.79913207918627	17.1092013733259	9.74011211244186	-1.15704000887292	0.523898732405861	-2.2085184355372	0.027208154130035	0.908048196375884
ENSMUSG00000104877	Gm42651	5	8	4	8	19	9	9	15	4.2367101881255	8.3533408150551	4.17133990505172	7.8726972117811	20.3836020701448	9.19582114484352	8.69869811877941	15.0963541529346	9.75107045083946	-1.16279982877104	0.528359281510711	-2.2007748694152	0.027751965511294	0.908048196375884
ENSMUSG00000058700	Rpl21-ps12	8	7	3	7	21	12	2	6	6.7787363010008	7.30917321317321	3.12850492878879	6.88861006030846	22.5292443933179	12.2610948597914	1.93304402639542	6.03854166117384	8.35836868049372	-1.37695870109909	0.6244116097734	-2.20520996013958	0.027439364589569	0.908048196375884
ENSMUSG00000108401	Rpl19-ps10	2	6	2	3	20	5	5	6	1.6946840752502	6.26500561129133	2.08566995252586	2.95226145441791	21.4564232317313	5.10878952491307	4.83261006598856	6.03854166117384	6.30424819716151	-1.61402669289466	0.733550260689391	-2.20029462109085	0.027785998673705	0.908048196375884
ENSMUSG00000068008	Bpifb3	0	1	3	1	4	3	0	9	0	1.04416760188189	3.12850492878879	0.984087151472637	4.29128464634626	3.06527371494784	0	9.05781249176076	2.69639131689977	-2.46054601434666	1.11758673767233	-2.20165999774783	0.027689334388672	0.908048196375884
ENSMUSG00000081151	Gm11448	2	2	0	2	4	12	3	4	1.6946840752502	2.08833520376378	0	1.96817430294527	4.29128464634626	12.2610948597914	2.89956603959314	4.02569444078256	3.65360419605907	-1.97980786944091	0.901258989917594	-2.19671358797978	0.028040907812469	0.909690336195426
ENSMUSG00000006641	Slc5a6	1655	1456	1253	1253	1118	1104	1276	1176	1402.35107226954	1520.30802834003	1306.67222525745	1233.06120079521	1199.41405865378	1128.02072710081	1233.28208884028	1183.55416559007	1275.8329458559	0.194402933624274	0.088552966622353	2.19532942869473	0.028139975362388	0.911404791843513
ENSMUSG00000029119	Man2b2	1532	1313	1144	1273	951	1083	1198	1172	1298.12800164165	1370.99206127092	1193.00321284479	1252.74294382467	1020.25292466882	1106.56381109617	1157.89337181086	1179.52847114929	1197.3880997884	0.186603348898386	0.085026854439277	2.19464015373697	0.028189420803669	0.911404791843513
ENSMUSG00000028420	Tmem38b	468	371	444	445	495	495	429	437	396.556073608547	387.38618029818	463.018729460741	437.918782405324	531.04647498535	505.770162966394	414.637943661818	439.807117655495	447.017683130231	-0.22929163146664	0.104469577308777	-2.1948172604253	0.02817670883565	0.911404791843513
ENSMUSG00000022890	Atp5j	4496	4155	4018	4018	4973	4472	3940	3983	3809.64980116245	4338.51638581924	4190.11093462445	3954.06217461706	5335.13963656999	4569.30135108225	3808.09673199898	4008.58523940924	4251.68278191046	-0.206185973731181	0.09400283204462	-2.19340172254928	0.028278448332886	0.913250092431864
ENSMUSG00000037466	Tedc1	53	60	51	57	38	33	59	39	44.9091279941303	62.6500561129133	53.1845837894094	56.0929676339403	40.7672041402895	33.7180108644262	57.024798778665	39.25052079763	48.4496587639255	0.527900535088526	0.240801022479081	2.19226866087907	0.02836011324624	0.914464088164716
ENSMUSG00000081121	Gm12791	25	24	8	39	54	45	21	23	21.1835509406275	25.0600224451653	8.34267981010344	38.3793989074329	57.9323427256746	45.9791057242176	20.2969622771519	23.1477430344997	30.0402257331091	-0.899283877475422	0.41025860074212	-2.19199274761992	0.028380030306921	0.914464088164716
ENSMUSG00000049562	Ap5b1	162	140	127	124	102	78	108	105	137.269410095266	146.183464263464	132.440041985392	122.026806782607	109.42775848183	79.6971165886439	104.384377425353	105.674479070542	117.137931836637	0.38702907137554	0.176639679560985	2.19106529369534	0.028447067807684	0.915591942580426
ENSMUSG00000103878	Gm8197	2	8	4	1	0	0	3	1	1.6946840752502	8.3533408150551	4.17133990505172	0.984087151472637	0	0	2.89956603959314	1.00642361019564	2.3886801995773	3.27613826599014	1.50729627094374	2.17351978449393	0.029741218409463	0.920404870890505
ENSMUSG00000033080	Vsx1	35	13	11	13	10	2	4	2	29.6569713168785	13.5741788244645	11.4711847388922	12.7931329691443	10.7282116158657	2.04351580996523	3.86608805279085	2.01284722039128	10.7682663185491	1.55561751818014	0.713492182589431	2.18028670270001	0.029236216119409	0.920404870890505
ENSMUSG00000004864	Mapk13	15	27	11	17	7	5	6	6	12.7101305643765	28.192525250811	11.4711847388922	16.7294815750348	7.50974813110596	5.10878952491307	5.79913207918627	6.03854166117384	11.6949416906867	1.26513244147384	0.58171194505885	2.17484349809226	0.029641846207877	0.920404870890505
ENSMUSG00000074896	Ifit3	758	371	523	480	361	301	369	410	642.285264519826	387.38618029818	545.402692585512	472.361832706866	387.28843933275	307.549129399767	356.646622869956	412.633680180213	438.944230236634	0.382280823842201	0.175896823722876	2.17332420080809	0.029755925289627	0.920404870890505
ENSMUSG00000004665	Cnn2	337	249	206	186	179	176	197	156	285.554266679659	259.99773286859	214.824005110163	183.040210173911	192.034987923995	179.82939127694	190.404836599949	157.00208319052	207.835939227966	0.365361447461321	0.167541247182252	2.18072536528202	0.029203735749405	0.920404870890505
ENSMUSG00000024769	Cdc42bpg	464	492	298	372	241	298	328	327	393.166705458046	513.730460125889	310.764822926353	366.080420347821	258.549899942362	304.483855684819	317.019220328849	329.100520533974	349.111988168514	0.353438160772856	0.161618368022607	2.18686876434377	0.028752105765368	0.920404870890505
ENSMUSG00000021253	Tgfb3	370	311	278	279	227	263	296	239	313.516553921287	324.736124185267	289.908123401094	274.560315260866	243.53040368015	268.722329010427	286.090515906523	240.535242836758	280.199951025297	0.247007920179841	0.113358794775849	2.17899211674105	0.029332253849043	0.920404870890505
ENSMUSG00000042292	Mrtfa	1354	1199	1038	1146	807	923	1191	1151	1147.30111894439	1251.95695465638	1082.46270536092	1127.76387558764	865.766677400359	943.082546298952	1151.12771771847	1158.39357533518	1090.98189641279	0.219594738916543	0.100452277246052	2.18606033568217	0.028811191385208	0.920404870890505
ENSMUSG00000040584	Abcb1a	1453	1207	1075	1173	843	1002	1181	1149	1231.18798066927	1260.31029547144	1121.04759948265	1154.3342286774	904.388239217475	1023.80142079258	1141.4624975865	1156.38072811479	1124.11412375151	0.20036760449444	0.092107872792157	2.17535807114527	0.02960329395609	0.920404870890505
ENSMUSG00000051786	Tubgcp6	1870	1595	1466	1482	1150	1394	1527	1423	1584.52961035894	1665.44732500161	1528.79607520145	1458.41715848245	1233.74433582455	1424.33051954576	1475.87911415291	1432.1407973084	1475.41061698451	0.177794974438482	0.081431036660325	2.18338095313856	0.029007767416015	0.920404870890505
ENSMUSG00000060371	Caln1	3213	2449	2741	2738	2113	2603	2745	2269	2722.50996688945	2557.16645700874	2858.41066993669	2694.43062073208	2266.87111443241	2659.63582666974	2653.10292622772	2283.57517153391	2586.96284417884	0.166300643791449	0.076292067950078	2.17978943630507	0.029273073341374	0.920404870890505
ENSMUSG00000038025	Phf2	2659	2338	2131	2335	1727	2024	2339	2201	2253.08247804514	2441.26385319985	2222.2813344163	2297.84349868861	1852.76214606	2068.03799968481	2260.69498886945	2215.1383660406	2201.3880831256	0.165803249950877	0.075825639007332	2.18663834715385	0.02876893562443	0.920404870890505
ENSMUSG00000026853	Crat	1933	1443	1394	1479	1194	1341	1556	1397	1637.91215872932	1506.73384951556	1453.71195691052	1455.46489702803	1280.94846693436	1370.17735058168	1503.90825253564	1405.97378344331	1451.8538394598	0.160854870675714	0.073577998290184	2.18618166318306	0.028802317261035	0.920404870890505
ENSMUSG00000035206	Sppl2b	1483	1195	1145	1199	963	1061	1218	1136	1256.60824179802	1247.78028424886	1194.04604782105	1179.92049461569	1033.12677860786	1084.08513718655	1177.22381207481	1143.29722118225	1164.51100219189	0.156087897603563	0.071759432848973	2.17515511768426	0.029618494249404	0.920404870890505
ENSMUSG00000019889	Ptprk	2117	1548	1535	1729	1361	1444	1626	1517	1793.82309365234	1616.37144771316	1600.7516885636	1701.48668489619	1460.10960091932	1475.41841479489	1571.56479345948	1526.74461666679	1593.28379258322	0.156023450226091	0.071756394748358	2.17434907053579	0.029678929808022	0.920404870890505
ENSMUSG00000022797	Tfrc	3535	2747	3049	3219	3278	3004	3264	3864	2995.35410300473	2868.32840236955	3179.60384262567	3167.77654059042	3516.70776768076	3069.36074656777	3154.72785107733	3888.82082979595	3230.08501046402	-0.184223822787739	0.084288298164763	-2.18563936867756	0.028841999968945	0.920404870890505
ENSMUSG00000022323	Rida	1370	1085	1243	1294	1381	1361	1203	1234	1160.85859154639	1132.92184804185	1296.24387549482	1273.40877400559	1481.56602415105	1390.61250868134	1162.72598187685	1241.92673498142	1267.53304234741	-0.18624659072556	0.08561157681771	-2.1754837096638	0.029593887563622	0.920404870890505
ENSMUSG00000027965	Olfm3	1549	1357	1490	1571	1474	1676	1724	1884	1312.53281628128	1416.93543575372	1553.82411463176	1546.00091496351	1581.3383921786	1712.46624875086	1666.28395075286	1896.10208160859	1585.68549436515	-0.207165244443382	0.095208269255304	-2.17591650456183	0.029561504448861	0.920404870890505
ENSMUSG00000035171	1110059E24Rik	755	634	761	730	814	755	708	774	639.743238406951	662.002259593117	793.597416936089	718.383620575025	873.276425531465	771.427218261873	684.29758534398	778.971874291426	740.212454867491	-0.208128631240777	0.095200627353721	-2.18621071127472	0.02880019297757	0.920404870890505
ENSMUSG00000048706	Lurap1l	404	298	344	333	374	379	358	383	342.32618320054	311.161945360803	358.735231834448	327.701021440388	401.235114433376	387.246245988411	346.014880724781	385.46024270493	357.48510821096	-0.214218513786792	0.098131729223292	-2.18296890804149	0.029038099774743	0.920404870890505
ENSMUSG00000006412	Pfdn2	3823	3234	3518	3421	4491	3809	3813	3413	3239.38860984076	3376.83802448602	3668.69344649299	3366.56214518789	4818.03983668527	3891.87586007877	3685.34843632287	3434.92378159772	3685.20876758654	-0.22340348703004	0.102572799427508	-2.17799931635801	0.029406087649489	0.920404870890505
ENSMUSG00000046330	Rpl37a	5119	4136	4567	4608	6257	4670	4241	4345	4337.54389060289	4318.67720138349	4762.6273365928	4534.67359398591	6712.64200804714	4771.60941626881	4099.0198579715	4372.91058630006	4738.71298639407	-0.261074523591356	0.119694582304366	-2.18117243541969	0.029170664803969	0.920404870890505
ENSMUSG00000030493	Faap24	120	105	104	119	133	127	95	128	101.681044515012	109.637598197598	108.454837531345	117.106371025244	142.685214491013	129.763253932792	91.8195912537826	128.822222105042	116.246266631479	-0.339797053417465	0.155843121154105	-2.18037890220036	0.029229386712761	0.920404870890505
ENSMUSG00000095478	Gm9824	151	196	92	178	267	208	181	160	127.94864768139	204.65684996885	95.9408178161895	175.167512962129	286.443250143613	212.525644236384	174.940484388786	161.027777631302	179.831373103581	-0.498256820626734	0.229217644910603	-2.17372803398735	0.029725565997047	0.920404870890505
ENSMUSG00000043424	Eif3j2	31	51	37	49	74	67	48	45	26.2676031663781	53.2525476959763	38.5848941217284	48.2202704221592	79.3887659574059	68.4577796338351	46.3930566334902	45.2890624588038	50.7317475112221	-0.601592808179384	0.276089036810396	-2.17898115451983	0.029333068229358	0.920404870890505
ENSMUSG00000111656	Gm47232	47	31	36	27	51	36	26	56	39.8250757683797	32.3691956583385	37.5420591454655	26.5703530897612	54.7138792409149	36.7832845793741	25.1295723431405	56.3597221709559	38.6616427495413	-0.607304555173071	0.27762688499731	-2.18748467094228	0.028707161056778	0.920404870890505
ENSMUSG00000083678	Gm12989	36	49	20	49	67	56	45	51	30.5043133545036	51.1642124922125	20.8566995252586	48.2202704221592	71.8790178262999	57.2184426790264	43.493490593897	51.3276041199777	46.8330063766669	-0.631080977712389	0.289770635920957	-2.17786379805763	0.029416178432214	0.920404870890505
ENSMUSG00000060377	Rpl36a-ps1	39	66	20	56	96	66	53	55	33.0463394673789	68.9150617242046	20.8566995252586	55.1088804824677	102.99083151231	67.4360217288525	51.2256666994787	55.3532985607602	56.8665999625889	-0.716214099777663	0.329105047642183	-2.17624769024011	0.029536744653155	0.920404870890505
ENSMUSG00000111336	Aldoa-ps4	41	67	14	41	76	62	54	68	34.7410235426291	69.9592293260865	14.599689667681	40.3475732103781	81.534408280579	63.348990108922	52.1921887126764	68.4368054933036	53.144988542782	-0.747820389877698	0.342741129999489	-2.18188108873544	0.029118309897894	0.920404870890505
ENSMUSG00000100078	Gm6170	103	167	76	206	316	213	155	191	87.2762298753853	174.375989514275	79.2554581959826	202.721953203363	339.011487061355	217.634433761297	149.810912045645	192.226909547367	180.289171650584	-0.848203729829143	0.390226878142692	-2.17361688120055	0.029733919561975	0.920404870890505
ENSMUSG00000084145	Gm12263	15	8	15	15	28	24	15	17	12.7101305643765	8.3533408150551	15.6425246439439	14.7613072720896	30.0389925244238	24.5221897195827	14.4978301979657	17.1092013733259	17.2044396388454	-0.85286109131638	0.39118360830872	-2.18020661705054	0.029242149342449	0.920404870890505
ENSMUSG00000112099	Gm8960	26	22	7	13	42	26	15	19	22.0308929782526	22.9716872414015	7.29984483384051	12.7931329691443	45.0584887866358	26.565705529548	14.4978301979657	19.1220485937172	21.2924538913132	-0.916982385888224	0.421903416109636	-2.17344148180573	0.029747105615638	0.920404870890505
ENSMUSG00000081070	Gm13181	9	7	4	12	23	15	6	9	7.6260783386259	7.30917321317321	4.17133990505172	11.8090458176716	24.674886716491	15.3263685747392	5.79913207918627	9.05781249176076	10.7217296420875	-1.14723299322951	0.526011938563099	-2.18100181597282	0.02918328216527	0.920404870890505
ENSMUSG00000105946	Gm43776	5	2	10	10	14	16	14	22	4.2367101881255	2.08833520376378	10.4283497626293	9.84087151472637	15.0194962622119	16.3481264797218	13.531308184768	22.1413194243041	11.7043146275313	-1.15729693740332	0.529976406449096	-2.18367633600398	0.028986039837478	0.920404870890505
ENSMUSG00000039013	Siglecf	8	2	6	4	9	11	6	15	6.7787363010008	2.08833520376378	6.25700985757758	3.93634860589055	9.65539045427909	11.2393369548087	5.79913207918627	15.0963541529346	7.60633045118018	-1.26131655715524	0.578553686893955	-2.18012016123653	0.029248555668256	0.920404870890505
ENSMUSG00000104488	Gm38062	1	1	1	2	4	6	1	5	0.8473420376251	1.04416760188189	1.04283497626293	1.96817430294527	4.29128464634626	6.13054742989568	0.966522013197712	5.0321180509782	2.66537388239163	-2.14119168630353	0.980833868268464	-2.18303196450947	0.029033456156586	0.920404870890505
ENSMUSG00000024761	Gm16437	30	41	14	38	64	49	26	30	25.420261128753	42.8108716771574	14.599689667681	37.3953117559602	68.6605543415402	50.0661373441481	25.1295723431405	30.1927083058692	36.7843883205312	-0.771211936368546	0.354998690680478	-2.17243600220117	0.029822791928844	0.921475909317079
ENSMUSG00000059970	Hspa2	1393	1130	1210	1175	931	923	1122	1135	1180.34745841176	1179.90939012653	1261.83032127814	1156.30240298035	998.796501437093	943.082546298952	1084.43769880783	1142.29079757205	1118.37463961409	0.18934488769389	0.087187009252327	2.17170986042093	0.029877554316678	0.92217103663605
ENSMUSG00000034771	Tle2	2208	1520	1497	1600	1268	1424	1479	1373	1870.93121907622	1587.13475486047	1561.12395946561	1574.53944235622	1360.33723289177	1454.98325669524	1429.48605751942	1381.81961679861	1527.54444245794	0.198314380000742	0.091371336373584	2.17042223383827	0.029974873970201	0.922859571699577
ENSMUSG00000088246	Gm25911	38	92	11	42	172	101	60	86	32.1989974297538	96.0634193731337	11.4711847388922	41.3316603618508	184.525239792889	103.197548403244	57.9913207918627	86.5524304768251	76.6664751710564	-1.38432540429781	0.63778245346108	-2.17052914639692	0.029966783089567	0.922859571699577
ENSMUSG00000091668	Gm8358	3	0	0	3	8	5	0	4	2.5420261128753	0	0	2.95226145441791	8.58256929269253	5.10878952491307	0	4.02569444078256	2.90141760321017	-2.3754153612083	1.09459409020266	-2.17013355221797	0.029996730069239	0.922859571699577
ENSMUSG00000095524	Gm15682	139	189	80	219	333	240	187	215	117.780543229889	197.347676755677	83.4267981010344	215.515086172508	357.249446808326	245.221897195827	180.739616467972	216.381076192063	201.707767615412	-0.779977307591448	0.359581491581384	-2.16912529107443	0.030073173070136	0.924216515610269
ENSMUSG00000022946	Dop1b	3518	2961	2699	3104	2077	2623	2946	2856	2980.9492883651	3091.78026917227	2814.61160093365	3054.60651817107	2228.2495526153	2680.0709847694	2847.37385088046	2874.34583071875	2821.49848695325	0.189023688901673	0.087332143610204	2.16442286983539	0.030431910205256	0.92496949845523
ENSMUSG00000053293	Pom121	3566	2680	2446	2686	2087	2452	2752	2525	3021.62170617111	2798.36917304346	2550.77435193913	2643.2580888555	2238.97776423116	2505.35038301737	2659.8685803201	2541.21961574399	2619.92995791523	0.171495972585751	0.079218076467469	2.16485908561762	0.030398478308744	0.92496949845523
ENSMUSG00000000563	Atp5pb	6893	5798	6489	6718	7205	6875	6507	6493	5840.72866534981	6054.08375571118	6766.95616097015	6611.09748359318	7729.67646923121	7024.58559675547	6289.15873987751	6534.70850100029	6606.3744215611	-0.168911344949923	0.078045794776654	-2.16425939966787	0.03044444681182	0.92496949845523
ENSMUSG00000063882	Uqcrh	3943	3038	3501	3587	4148	3655	3384	3446	3341.06965435577	3172.18117451717	3650.96525189652	3529.92061233235	4450.06217826108	3734.52514271145	3270.71049266106	3468.13576073418	3577.1962834337	-0.194968249440275	0.089934466809657	-2.16789242608085	0.030166872260631	0.92496949845523
ENSMUSG00000089941	Gm16168	44	24	32	27	37	58	37	44	37.2830496555044	25.0600224451653	33.3707192404137	26.5703530897612	39.6943829787029	59.2619584889916	35.7613144883153	44.2826388486082	37.6605549044328	-0.591606806333423	0.273355234102174	-2.16424173576385	0.030445801730752	0.92496949845523
ENSMUSG00000067161	Gm5560	27	69	23	32	79	64	41	44	22.8782350158777	72.0475645298502	23.9852044540474	31.4907888471244	84.7528717653387	65.3925059188873	39.6274025411062	44.2826388486082	48.057151490105	-0.774077159523213	0.357341174674093	-2.1662131721294	0.030294901037997	0.92496949845523
ENSMUSG00000105879	Gm6204	96	159	69	100	276	132	96	130	81.3448356120096	166.02264869922	71.9556133621421	98.4087151472637	296.098640597892	134.872043457705	92.7861132669803	130.835069325433	134.040459933581	-0.875411707178848	0.404302848879533	-2.16523754310642	0.030369498616442	0.92496949845523
ENSMUSG00000061390	Uba52-ps	18	29	8	19	38	24	8	27	15.2521566772518	30.2808604545747	8.34267981010344	18.6976558779801	40.7672041402895	24.5221897195827	7.73217610558169	27.1734374752823	21.5960450325808	-0.942468590479413	0.43486185307995	-2.16728274463325	0.030213301403366	0.92496949845523
ENSMUSG00000060438	Rps10-ps1	90	94	41	107	244	150	119	92	76.260783386259	98.1517545768974	42.7562340267801	105.297325207572	261.768363427122	153.263685747392	115.016119570528	92.5909721379989	118.138154760069	-0.95072678277287	0.438951727143828	-2.1659028179683	0.030318613936572	0.92496949845523
ENSMUSG00000098192	Gm3534	11	8	3	5	16	15	6	10	9.3207624138761	8.3533408150551	3.12850492878879	4.92043575736319	17.1651385853851	15.3263685747392	5.79913207918627	10.0642361019564	9.25973990704376	-1.15622177571231	0.534264052962849	-2.16413919166055	0.030453668452691	0.92496949845523
ENSMUSG00000084289	Gm6977	41	93	25	56	184	101	52	59	34.7410235426291	97.1075869750156	26.0708744065732	55.1088804824677	197.399093731928	103.197548403244	50.259144686281	59.3789930015428	77.9078931537102	-1.18897340176031	0.549085378078922	-2.16537072234587	0.030359306306156	0.92496949845523
ENSMUSG00000031902	Nfatc3	743	605	632	612	465	577	651	563	629.575133955449	631.721399138542	659.071704998171	602.261336701254	498.861840137753	589.554311174968	629.20583059171	566.616492540146	600.858506154749	0.191529673618196	0.088553653409104	2.16286585866038	0.030551498372534	0.926677340622853
ENSMUSG00000046312	Myorg	1490	1283	1112	1221	931	1144	1348	1137	1262.5396360614	1339.66703321446	1159.63249360438	1201.57041194809	998.796501437093	1168.89104330011	1302.87167379052	1144.30364479244	1197.28405476856	0.182653552660411	0.0844780220938	2.16214286430146	0.030607165933591	0.926677340622853
ENSMUSG00000002625	Akap8l	5320	4227	4078	4151	3204	3706	4353	4205	4507.85964016553	4413.69645315474	4252.68103320023	4084.94576576292	3437.31900172336	3786.63479586557	4207.27032344964	4232.01128087267	4115.30228677433	0.168931182469027	0.078117043329414	2.16253938025606	0.030576625075835	0.926677340622853
ENSMUSG00000109157	Gm44829	74	43	68	61	81	79	91	106	62.7033107842574	44.8992068809212	70.9127783858792	60.0293162398309	86.8985140885118	80.7188744936265	87.9535032009918	106.680902680738	75.0995508443446	-0.484964601649189	0.224356197051115	-2.1615832681399	0.030650312296318	0.927001667450846
ENSMUSG00000006717	Acot13	1185	978	1022	1027	1224	1122	1147	1081	1004.10031458574	1021.19591464049	1065.77734574071	1010.6575045624	1313.13310178196	1146.41236939049	1108.60074913778	1087.94392262149	1094.72765280763	-0.182127021402789	0.084274256636357	-2.16112284666796	0.030685851182192	0.927095467905109
ENSMUSG00000054910	4931415C17Rik	66	51	56	60	68	70	63	87	55.9245744832566	53.2525476959763	58.398758670724	59.0452290883582	72.9518389878865	71.5230533487829	60.8908868314558	87.5588540870207	64.9432178991826	-0.428513749182647	0.198329198510558	-2.1606185695337	0.030724815783071	0.9272924602914
ENSMUSG00000105331	Gm29865	8	12	11	12	1	8	19	5	6.7787363010008	12.5300112225827	11.4711847388922	11.8090458176716	1.07282116158657	8.17406323986091	18.3639182507565	5.0321180509782	9.40398734791619	1.34214911635792	0.622555452196434	2.15587079291121	0.03109375567601	0.927814430638822
ENSMUSG00000053965	Pde5a	210	230	131	154	106	132	168	144	177.941827901271	240.158548432834	136.611381890444	151.549421326786	113.719043128176	134.872043457705	162.375698217216	144.924999868172	157.769120527825	0.40397928536748	0.187368591404004	2.15606725940753	0.031078413596517	0.927814430638822
ENSMUSG00000031486	Adgra2	880	726	561	598	497	551	615	554	745.660993110088	758.06567896625	585.030421683503	588.484116580637	533.192117308523	562.98860564542	594.411038116593	557.558680048385	615.673956432425	0.247737311052774	0.114904641316518	2.15602527638857	0.031081691506828	0.927814430638822
ENSMUSG00000022556	Hsf1	2097	1705	1606	1671	1426	1466	1814	1634	1776.87625289983	1780.30576120862	1674.79297187826	1644.40963011078	1529.84297642244	1497.89708870451	1753.27093194065	1644.49617905968	1662.7364740281	0.148266093168003	0.068700364394122	2.15815584787043	0.030915716865146	0.927814430638822
ENSMUSG00000075701	Selenos	1059	862	907	959	1112	991	978	955	897.335217844981	900.072472822187	945.851323470477	943.739578262259	1192.97713168426	1012.56208383777	945.258528907362	961.134547736837	974.866360570767	-0.187843548178185	0.08712470798693	-2.15603073477577	0.031081265315272	0.927814430638822
ENSMUSG00000028609	Magoh	659	516	529	594	705	611	542	556	558.398402794941	538.790482571054	551.65970244309	584.547767974747	756.338918918529	624.294079944377	523.85493115316	559.571527268776	587.181976633584	-0.229040463199736	0.106107942974669	-2.15856095951662	0.030884244310918	0.927814430638822
ENSMUSG00000081049	Rps24-ps3	56	49	43	48	74	67	43	49	47.4511541070056	51.1642124922125	44.841903979306	47.2361832706866	79.3887659574059	68.4577796338351	41.5604465675016	49.3147568995864	53.6769003634425	-0.498671804070193	0.230961071650998	-2.15911625498399	0.03084114888027	0.927814430638822
ENSMUSG00000106831	Ube2n-ps1	50	70	52	71	99	86	64	63	42.367101881255	73.0917321317321	54.2274187656723	69.8701877545573	106.20929499707	87.8711798285048	61.8574088446536	63.4046874423254	69.8623764557213	-0.512234396868413	0.237594808335944	-2.15591578139261	0.031090241949342	0.927814430638822
ENSMUSG00000075391	Glo1-ps	44	65	34	52	87	72	72	65	37.2830496555044	67.8708941223227	35.4563891929396	51.1725318765771	93.3354410580312	73.5665691587482	69.5895849502352	65.4175346627166	61.7114993346344	-0.568498054082114	0.263395998690743	-2.15833975044395	0.030901426322045	0.927814430638822
ENSMUSG00000095419	Gm14328	32	49	19	46	76	72	49	35	27.1149452040032	51.1642124922125	19.8138645489957	45.2680089677413	81.534408280579	73.5665691587482	47.3595786466879	35.2248263568474	47.6308017069769	-0.734353793279877	0.34064079175486	-2.15580109914831	0.031099199627445	0.927814430638822
ENSMUSG00000076281	Gm24270	69	152	31	62	247	152	102	130	58.4666005961319	158.713475486047	32.3278842641508	61.0134033913035	264.986826911882	155.307201557357	98.5852453461666	130.835069325433	120.029463359809	-1.16735471996591	0.54057838757241	-2.15945503335451	0.030814882296884	0.927814430638822
ENSMUSG00000048787	Dcun1d3	698	610	536	571	589	739	595	631	591.44474226232	636.942237147951	558.95954727693	561.913763490876	631.891664174487	755.079091782151	575.080597852639	635.053298033449	618.2956177526	-0.204940523283658	0.095091125720299	-2.15520135797393	0.031146080704276	0.928244142449323
ENSMUSG00000025127	Gcgr	8	1	1	1	0	0	2	0	6.7787363010008	1.04416760188189	1.04283497626293	0.984087151472637	0	0	1.93304402639542	0	1.47285875712671	3.65648709597544	1.69798256242765	2.15343029833455	0.031284876546471	0.928389295908531
ENSMUSG00000024142	Mlst8	1410	1119	1138	1147	979	984	1194	1091	1194.75227305139	1168.42354650583	1186.74620298721	1128.74796273911	1050.29191719325	1005.40977850289	1154.02728375807	1098.00815872344	1123.30089043265	0.150193236809114	0.069722210356173	2.15416631288447	0.031227131645749	0.928389295908531
ENSMUSG00000048878	Hexim1	2901	2569	2543	2459	2161	2272	2594	2278	2458.13925115042	2682.46656923457	2651.92934463663	2419.87030547122	2318.36653018857	2321.4339601205	2507.15810223486	2292.63298402567	2456.4996308828	0.138337335936937	0.064237297640616	2.15353604553673	0.031276574391436	0.928389295908531
ENSMUSG00000105944	Gm5075	9	13	5	9	31	10	12	16	7.6260783386259	13.5741788244645	5.21417488131465	8.85678436325374	33.2574560091835	10.2175790498261	11.5982641583725	16.1027777631302	13.3059116735214	-1.0815300261426	0.502320511381858	-2.15306761646537	0.031313364866724	0.928389295908531
ENSMUSG00000082632	Gm13365	2	5	1	8	11	13	6	9	1.6946840752502	5.22083800940944	1.04283497626293	7.8726972117811	11.8010327774522	13.282852764774	5.79913207918627	9.05781249176076	6.97148554823461	-1.40222090141056	0.651030936916775	-2.1538468018914	0.031252188019054	0.928389295908531
ENSMUSG00000025491	Ifitm1	118	57	44	36	30	35	33	28	99.9863604397618	59.5175533072676	45.8847389555689	35.4271374530149	32.184634847597	35.7615266743915	31.8952264355245	28.1798610854779	46.1046298998255	0.773196916297002	0.359343566556454	2.15169266478444	0.031421568253496	0.929055809101179
ENSMUSG00000016257	Prelid3b	1459	1173	1293	1288	1367	1348	1377	1415	1236.27203289502	1224.80859700745	1348.38562430797	1267.50425109676	1466.54652788884	1377.32965591656	1330.90081217325	1424.08940842683	1334.47961371408	-0.150785935374361	0.070082695834783	-2.15154302468377	0.031433363682196	0.929055809101179
ENSMUSG00000082884	Gm13339	166	352	145	377	654	458	304	355	140.658778245767	367.546995862424	151.211071558125	371.000856105184	701.625039677614	467.965120482037	293.822692012104	357.280381619452	356.388866945339	-0.942626487351195	0.438087871324061	-2.15168359832066	0.031422282812323	0.929055809101179
ENSMUSG00000040312	Cchcr1	226	169	167	152	126	135	146	125	191.499300503273	176.464324718039	174.153441035909	149.581247023841	135.175466359907	137.937317172653	141.112213926866	125.802951274455	153.965782751868	0.326324389921499	0.151763643180039	2.15021452492661	0.031538249755451	0.930805977953991
ENSMUSG00000022416	Cacna1i	3730	2962	2917	3119	2320	2570	2950	2996	3160.58580034162	3092.82443677415	3041.94962575896	3069.36782544316	2488.94509488083	2625.91781580532	2851.23993893325	3015.24513614614	2918.25945926043	0.167139973387711	0.077740664417542	2.14996841923048	0.031557712908485	0.930805977953991
ENSMUSG00000020100	Slc29a3	705	674	509	643	453	529	674	563	597.376136525696	703.768963668392	530.803002917831	632.768038396906	485.987986198714	540.509931735803	651.435836895258	566.616492540146	588.658298609843	0.230303132067038	0.107155092833005	2.14925045537456	0.031614551617281	0.931521133787115
ENSMUSG00000041845	Rhod	43	45	33	28	19	20	23	20	36.4357076178793	46.9875420846849	34.4135542166767	27.5544402412338	20.3836020701448	20.4351580996523	22.2300063035474	20.1284722039128	28.5710603547165	0.720852158972904	0.335575433563702	2.14810765888816	0.031705203943162	0.932140901867753
ENSMUSG00000026365	Cfh	1309	840	662	638	439	507	539	555	1109.17072725126	877.100785580786	690.356754286059	627.847602639543	470.968489936502	518.031257826185	520.955365113567	558.56510365858	671.62451078656	0.5688908892364	0.265047313205905	2.14637485796527	0.031843083564727	0.932140901867753
ENSMUSG00000022469	Rapgef3	2185	1956	1828	1780	1334	1643	1851	1783	1851.44235221084	2042.39182928097	1906.30233660863	1751.67512962129	1431.14342955648	1678.74823788643	1789.03224642896	1794.45329697883	1780.64860732156	0.192019194008411	0.089448267562078	2.14670668579631	0.031816640173329	0.932140901867753
ENSMUSG00000036073	Galt	847	751	681	745	595	653	768	657	717.69870586846	784.169869013298	710.170618835055	733.144927847115	638.328591144007	667.207911953647	742.288906135843	661.220311898536	706.778730336995	0.169280177576069	0.078808324989036	2.14799867399313	0.031713860800313	0.932140901867753
ENSMUSG00000072476	Gm9008	10	9	4	8	19	19	9	9	8.473420376251	9.39750841693699	4.17133990505172	7.8726972117811	20.3836020701448	19.4134001946697	8.69869811877941	9.05781249176076	10.9335598481719	-1.06922767616555	0.498195869636591	-2.14619939933565	0.031857073493804	0.932140901867753
ENSMUSG00000081251	Gm12164	6	14	9	13	29	12	5	16	5.0840522257506	14.6183464263464	9.38551478636636	12.7931329691443	31.1118136860104	12.2610948597914	4.83261006598856	16.1027777631302	13.273667847816	-1.09434329388487	0.509911909312085	-2.1461418607799	0.031861662390937	0.932140901867753
ENSMUSG00000048015	Neurod4	9	8	5	8	12	7	7	28	7.6260783386259	8.3533408150551	5.21417488131465	7.8726972117811	12.8738539390388	7.15230533487829	6.76565409238398	28.1798610854779	10.5047457123195	-1.16582046638829	0.543223920353845	-2.14611401064389	0.031863883738316	0.932140901867753
ENSMUSG00000112239	Gm17823	31	45	16	30	60	39	21	36	26.2676031663781	46.9875420846849	16.6853596202069	29.5226145441791	64.369269695194	39.8485582943219	20.2969622771519	36.2312499670431	35.026144956145	-0.744504771587767	0.347059928272747	-2.14517641173105	0.031938744835026	0.933375527740169
ENSMUSG00000110617	Gm5910	26	41	20	27	42	46	40	48	22.0308929782526	42.8108716771574	20.8566995252586	26.5703530897612	45.0584887866358	47.0008636292002	38.6608805279085	48.3083332893907	36.4121729379456	-0.637147400893372	0.297274942416261	-2.14329332877711	0.032089552181543	0.936045041126939
ENSMUSG00000110514	Gm7688	9	7	4	8	19	16	9	9	7.6260783386259	7.30917321317321	4.17133990505172	7.8726972117811	20.3836020701448	16.3481264797218	8.69869811877941	9.05781249176076	10.1834409786298	-1.08813078173355	0.507708852765502	-2.14321805855162	0.032095592887037	0.936045041126939
ENSMUSG00000006014	Prg4	386	248	114	115	92	52	79	85	327.074026523289	258.953565266708	118.883187293974	113.170022419353	98.6995468659641	53.1314110590959	76.3552390426192	85.5460068666294	141.476625667204	1.17766321352253	0.549765624025476	2.14211868122907	0.032183932991142	0.936709764582308
ENSMUSG00000106579	Gm42771	9	0	6	9	10	21	10	15	7.6260783386259	0	6.25700985757758	8.85678436325374	10.7282116158657	21.4569160046349	9.66522013197712	15.0963541529346	9.96082180810869	-1.27247781524403	0.593965341770316	-2.14234354390343	0.032165847293059	0.936709764582308
ENSMUSG00000037025	Foxa2	67	41	20	27	19	29	33	6	56.7719165208817	42.8108716771574	20.8566995252586	26.5703530897612	20.3836020701448	29.6309792444958	31.8952264355245	6.03854166117384	29.3697737780497	0.944167256403407	0.441204429881874	2.13997682810255	0.032356639430154	0.936965665200855
ENSMUSG00000068699	Flnc	311	207	126	185	123	135	143	138	263.523373701406	216.142693589551	131.397207009129	182.056123022438	131.957002875148	137.937317172653	138.212647887273	138.886458206998	167.514102933074	0.453251897714002	0.211719514487466	2.14081304130723	0.032289117858726	0.936965665200855
ENSMUSG00000066306	Numa1	7006	5284	4924	5464	3737	4653	5193	5271	5936.47831560145	5517.38160834389	5134.91942311866	5377.05219564649	4009.132680849	4754.2395318841	5019.14881453572	5304.85884934122	5131.65142741507	0.20272358523292	0.094661373121032	2.14156607440843	0.032228416167687	0.936965665200855
ENSMUSG00000022982	Sod1	8324	6738	7070	7628	9525	7521	7438	7247	7053.27512119133	7035.60130148016	7372.84328217891	7506.61679143328	10218.621564112	7684.64120337424	7188.99073416458	7293.55190308781	7669.26773762779	-0.215850262528372	0.100861316808069	-2.14006984401282	0.032349122714714	0.936965665200855
ENSMUSG00000082419	Gm11425	47	75	46	74	125	80	66	60	39.8250757683797	78.3125701411416	47.9704089080948	72.8224492089752	134.102645198321	81.7406323986091	63.790452871049	60.3854166117384	72.3687063882886	-0.606051913471838	0.283126993346409	-2.14056563914528	0.032309082213646	0.936965665200855
ENSMUSG00000066366	Serpina1a	105	2	2	2	0	2	2	2	88.9709139506355	2.08833520376378	2.08566995252586	1.96817430294527	0	2.04351580996523	1.93304402639542	2.01284722039128	12.6378125583278	3.84044168853732	1.79894429717634	2.1348307974657	0.032774833665196	0.939698275134914
ENSMUSG00000092457	Gm8835	2	4	1	2	0	0	2	0	1.6946840752502	4.17667040752755	1.04283497626293	1.96817430294527	0	0	1.93304402639542	0	1.35192597354767	3.50324397435154	1.64043002246078	2.13556441078564	0.032714934869446	0.939698275134914
ENSMUSG00000032092	Mpzl2	53	38	12	10	10	5	3	8	44.9091279941303	39.6783688715117	12.5140197151552	9.84087151472637	10.7282116158657	5.10878952491307	2.89956603959314	8.05138888156512	16.7162930196826	1.47012653009764	0.688044847831247	2.13667253629114	0.032624635281598	0.939698275134914
ENSMUSG00000057143	Trim12c	231	138	160	181	132	128	164	134	195.736010691398	144.0951290597	166.853596202069	178.119774416547	141.612393329427	130.785011837775	158.509610164425	134.860763766216	156.321536183445	0.316390608519145	0.148101405000589	2.13631064822029	0.032654101529588	0.939698275134914
ENSMUSG00000039646	Vasn	528	383	354	338	261	280	331	349	447.396595866053	399.916191520763	369.163581597077	332.621457197751	280.006323174094	286.092213395132	319.918786368443	351.241839958279	348.294623634699	0.290200509821792	0.135910296513616	2.13523564634942	0.032741766555843	0.939698275134914
ENSMUSG00000026728	Vim	2120	1555	1399	1501	1225	1196	1295	1343	1796.36511976521	1623.68062092634	1458.92613179184	1477.11481436043	1314.20592294354	1222.02245435921	1251.64600709104	1351.62690849275	1436.94849746629	0.231892431562705	0.1084601671788	2.13804235780333	0.032513305564194	0.939698275134914
ENSMUSG00000081344	Gm14303	62	58	53	59	93	82	72	61	52.5352063327562	60.5617209091495	55.2702537419353	58.0611419368856	99.7723680275506	83.7841482085743	69.5895849502352	61.3918402219341	67.6207830411276	-0.46273535744143	0.216584356546511	-2.1365132958809	0.032637598410391	0.939698275134914
ENSMUSG00000084459	Gm24598	15	29	9	20	43	45	37	26	12.7101305643765	30.2808604545747	9.38551478636636	19.6817430294527	46.1313099482223	45.9791057242176	35.7613144883153	26.1670138650867	28.2621241075765	-0.872477134226519	0.408137587893211	-2.13770346105638	0.032540818433108	0.939698275134914
ENSMUSG00000085833	Gm13003	14	9	1	3	13	16	9	18	11.8627885267514	9.39750841693699	1.04283497626293	2.95226145441791	13.9466751006254	16.3481264797218	8.69869811877941	18.1156249835215	10.2955647571272	-1.2331325830972	0.577613921721199	-2.13487337601327	0.032771354604021	0.939698275134914
ENSMUSG00000084422	Gm25108	1	2	1	0	3	5	0	5	0.8473420376251	2.08833520376378	1.04283497626293	0	3.2184634847597	5.10878952491307	0	5.0321180509782	2.16723540978785	-2.50978822402682	1.17567140890526	-2.1347701449709	0.032779790081156	0.939698275134914
ENSMUSG00000041642	Kif21b	4626	3740	3010	3478	2454	3293	3595	3207	3919.80426605371	3905.18683103826	3138.93327855142	3422.65511282183	2632.70313053343	3364.64878110775	3474.64663744577	3227.60051789742	3385.7723194312	0.216241767438072	0.101324706206044	2.13414650320668	0.032830790234734	0.940217250199323
ENSMUSG00000046280	She	256	198	159	165	143	141	175	145	216.919561632026	206.745185172614	165.810761225806	162.374379992985	153.413426106879	144.067864602548	169.1413523096	145.931423478368	170.550494315103	0.319715312423889	0.149917518087589	2.1326080934524	0.032956888840184	0.942883723664962
ENSMUSG00000026463	Atp2b4	6518	4716	4928	5698	3846	4695	5175	4972	5522.9754012404	4924.29441047498	5139.09076302372	5607.32858909109	4126.07018746193	4797.15336389337	5001.75141829816	5003.93818989272	5015.32529042205	0.174435277655195	0.081888890026712	2.13014583050636	0.033159575607279	0.945842146139359
ENSMUSG00000007594	Hapln4	3874	3150	2978	3207	2665	3016	3281	2820	3282.60305375964	3289.12794592795	3105.562559311	3155.96749477275	2859.0683956282	3081.62184142756	3171.15872530169	2838.11458075171	3097.90307461006	0.129468284015754	0.060774019654982	2.13032287070616	0.033144966629121	0.945842146139359
ENSMUSG00000046580	Gm7862	32	33	27	30	58	37	31	36	27.1149452040032	34.4575308621023	28.1565443590991	29.5226145441791	62.2236273720208	37.8050424843567	29.9621824091291	36.2312499670431	35.6842171502417	-0.604894401890423	0.283933824329948	-2.13040627800476	0.033138085946555	0.945842146139359
ENSMUSG00000032440	Tgfbr2	804	682	512	604	476	461	604	582	681.26299825058	712.122304483447	533.93150784662	594.388639489473	510.662872915205	471.030394196985	583.779295971418	585.738541133863	584.114569285949	0.249682489937798	0.117236610548613	2.12973139337105	0.033193795622954	0.945874249949784
ENSMUSG00000031274	Col4a5	512	352	327	330	211	292	270	294	433.839123264051	367.546995862424	341.007037237978	324.74875998597	226.365265094765	298.353308254923	260.960943563382	295.888541397518	318.588746832627	0.337758646023838	0.158688876676601	2.12843302629315	0.033301197324753	0.946330465518998
ENSMUSG00000020674	Pxdn	2079	1690	1647	1951	1197	1655	2095	1732	1761.62409622258	1764.64324718039	1717.54920590504	1919.95403252312	1284.16693041912	1691.00933274623	2024.86361764921	1743.12569285885	1738.36701943807	0.224318336932365	0.10539605213572	2.12833718518704	0.033309137129985	0.946330465518998
ENSMUSG00000072407	Gm6419	7	8	4	9	24	11	10	11	5.9313942633757	8.3533408150551	4.17133990505172	8.85678436325374	25.7477078780776	11.2393369548087	9.66522013197712	11.070659712152	10.629473002969	-1.11101794567693	0.521955192161461	-2.12856958291019	0.033289887304807	0.946330465518998
ENSMUSG00000108231	Gm4045	11	20	13	11	41	15	8	16	9.3207624138761	20.8833520376378	13.5568546914181	10.824958666199	43.9856676250492	15.3263685747392	7.73217610558169	16.1027777631302	17.2166147347039	-1.01667796094599	0.477851372914445	-2.1276028877875	0.033370022603223	0.947118784530993
ENSMUSG00000033227	Wnt6	124	96	29	42	25	24	19	17	105.070412665512	100.240089780661	30.242214311625	41.3316603618508	26.8205290396641	24.5221897195827	18.3639182507565	17.1092013733259	45.4625269378723	1.3736092624179	0.64657072593405	2.12445322270593	0.033632263585144	0.948290073325099
ENSMUSG00000026837	Col5a1	310	318	157	176	116	186	275	200	262.676031663781	332.04529739844	163.72509127328	173.199338659184	124.447254744042	190.046970326766	265.793553629371	201.284722039128	214.152282466749	0.477448656957503	0.225337230133623	2.11881834472883	0.034105821800512	0.948290073325099
ENSMUSG00000026875	Traf1	219	180	143	179	131	133	174	146	185.567906239897	187.95016833874	149.125401605599	176.151600113602	140.53957216784	135.893801362688	168.174830296402	146.937847088564	161.292640901666	0.298187409740453	0.140449923674606	2.12308701876758	0.033746560603289	0.948290073325099
ENSMUSG00000024395	Lims2	472	420	391	420	355	324	419	359	399.945441759047	438.550392790393	407.748475718805	413.316603618508	380.851512363231	331.049561214367	404.972723529841	361.306076060235	392.217598381803	0.206744411951878	0.097431317538543	2.12195028431276	0.033841913149975	0.948290073325099
ENSMUSG00000031503	Col4a2	5125	4124	3586	3955	2849	3754	3954	3642	4342.62794282864	4306.1471901609	3739.60622487886	3892.06468407428	3056.46748936013	3835.67917530473	3821.62804018375	3665.39478833252	3832.45194189048	0.192066607633948	0.090578782414277	2.1204370661056	0.033969203615143	0.948290073325099
ENSMUSG00000025357	Dgka	995	763	789	807	629	703	838	771	843.105327436975	796.69988023588	822.796796271451	794.158331238418	674.80451063795	718.295807202777	809.945447059682	775.952603460839	779.469837942997	0.169670001397129	0.079962549339387	2.12186833459993	0.033848796220782	0.948290073325099
ENSMUSG00000028059	Arhgef2	2671	2493	2220	2266	1794	2153	2485	2167	2263.25058249664	2603.10983149155	2315.0936473037	2229.941485237	1924.6411638863	2199.84476942757	2401.80720279631	2180.91996329395	2264.82608074163	0.168351751884478	0.079372752889527	2.12102699926252	0.033919530404924	0.948290073325099
ENSMUSG00000041836	Ptpre	1691	1265	1404	1504	1108	1265	1345	1258	1432.85538562404	1320.87201638059	1464.14030667315	1480.06707581485	1188.68584703792	1292.52374980301	1299.97210775092	1266.08090162612	1343.14967383882	0.164026182191791	0.077158784529753	2.12582641356335	0.033517715842318	0.948290073325099
ENSMUSG00000009035	Tmem184b	3371	2755	2573	2691	2249	2475	2886	2608	2856.39000883421	2876.6817431846	2683.21439392452	2648.17852461287	2412.77479240819	2528.85081483197	2789.3825300886	2624.75277539023	2677.5281979094	0.135613496085831	0.064057149386189	2.11707041891985	0.034253871792552	0.948290073325099
ENSMUSG00000023286	Ube2j2	1605	1352	1296	1362	1579	1446	1447	1425	1359.98397038829	1411.71459774431	1351.51412923676	1340.32670030573	1693.98461414519	1477.46193060486	1398.55735309709	1434.15364452879	1433.46211750638	-0.161398180995981	0.076232003696337	-2.11719715041068	0.034243119150233	0.948290073325099
ENSMUSG00000060073	Psma3	3631	2838	3371	3394	3742	3454	3361	3371	3076.69893861674	2963.3476541408	3515.39670498233	3339.99179209813	4014.49678665693	3529.15180380995	3248.48048635751	3392.6539899695	3385.02726957899	-0.175062797758782	0.082607782387778	-2.11920466448307	0.034073174270705	0.948290073325099
ENSMUSG00000059518	Znhit1	1382	1199	1108	1162	1430	1242	1277	1250	1171.02669599789	1251.95695465638	1155.46115369933	1143.5092700112	1534.13426106879	1269.02331798841	1234.24861085348	1258.02951274455	1252.1737221275	-0.184167324641201	0.08677692106912	-2.12230766397562	0.033811910321112	0.948290073325099
ENSMUSG00000021537	Cetn3	1665	1327	1647	1652	1738	1601	1545	1722	1410.82449264579	1385.61040769726	1717.54920590504	1625.7119742328	1864.56317883745	1635.83440587716	1493.27651039046	1733.06145675689	1608.30395404286	-0.192671851706468	0.090843652183251	-2.12091705998135	0.033928782737573	0.948290073325099
ENSMUSG00000090000	Ier3ip1	1683	1388	1705	1767	1850	1802	1658	1686	1426.07664932304	1449.30463141206	1778.03363452829	1738.88199665215	1984.71914893515	1841.20774477867	1602.49349788181	1696.83020678985	1689.69343878763	-0.203473422187122	0.09604028842409	-2.11862568850934	0.034122112991236	0.948290073325099
ENSMUSG00000031429	Psmd10	643	497	556	567	674	589	550	569	544.840930192939	518.951298135298	579.816246802189	557.977414884985	723.081462909345	601.815406034759	531.587107258742	572.655034201319	578.840612552447	-0.209857212780632	0.099029954139217	-2.11912864753643	0.034079596281571	0.948290073325099
ENSMUSG00000087687	Pet100	359	276	271	313	413	331	310	296	304.195791507411	288.190258119401	282.608278567254	308.019278410935	443.075139735252	338.201866549245	299.621824091291	297.90138861791	320.226728199837	-0.276959830452838	0.130752120495639	-2.11820526812852	0.034157687229125	0.948290073325099
ENSMUSG00000030188	Magohb	189	168	173	174	205	187	154	196	160.147645111144	175.420157116157	180.410450893487	171.231164356239	219.928338125246	191.068728231749	148.844390032448	197.259027598346	180.538737683102	-0.278971799433383	0.131538830950055	-2.1208322851775	0.033935918737137	0.948290073325099
ENSMUSG00000115593	Gm4824	78	102	54	116	158	127	131	109	66.0926789347578	106.505095391953	56.3130887181982	114.154109570826	169.505743530677	129.763253932792	126.6143837289	109.700173511325	109.831065914929	-0.537357782674108	0.253151705350128	-2.12267099655087	0.033781431050876	0.948290073325099
ENSMUSG00000042165	Gm9774	64	110	47	65	117	80	58	94	54.2298904080064	114.858436207008	49.0132438843577	63.9656648457214	125.520075905628	81.7406323986091	56.0582767654673	94.6038193583902	79.9987549716485	-0.575797948928332	0.271465684133768	-2.12107084829403	0.033915840734968	0.948290073325099
ENSMUSG00000095847	Gm5451	32	30	19	29	51	39	31	32	27.1149452040032	31.3250280564566	19.8138645489957	28.5385273927065	54.7138792409149	39.8485582943219	29.9621824091291	32.2055555262605	32.9403175840985	-0.623731655076751	0.293946994605427	-2.12191880347	0.033844557128336	0.948290073325099
ENSMUSG00000062588	Gm6104	26	31	20	29	48	49	39	31	22.0308929782526	32.3691956583385	20.8566995252586	28.5385273927065	51.4954157561552	50.0661373441481	37.6943585147108	31.1991319160649	34.2812948857044	-0.645515518437801	0.303980058240134	-2.12354561077117	0.033708157682247	0.948290073325099
ENSMUSG00000115783	Bc1	7080	12518	6146	12486	31108	16566	14861	11632	5999.18162638571	13070.8900403575	6409.26376411196	12287.3121732873	33373.3206946349	16926.441453942	14363.4836381312	11706.7194337957	14267.0766030808	-0.987269715049026	0.464448435167517	-2.12568207855612	0.03352974014866	0.948290073325099
ENSMUSG00000086743	Hnrnpa1l2-ps	5	4	3	9	15	12	4	7	4.2367101881255	4.17667040752755	3.12850492878879	8.85678436325374	16.0923174237985	12.2610948597914	3.86608805279085	7.04496527136948	7.45789193693072	-1.27735269265223	0.603426033182478	-2.11683391569213	0.034273945829216	0.948290073325099
ENSMUSG00000108830	Gm44661	8	2	3	4	9	11	2	8	6.7787363010008	2.08833520376378	3.12850492878879	3.93634860589055	9.65539045427909	11.2393369548087	1.93304402639542	8.05138888156512	5.85138566956154	-1.4085250942247	0.66525674467589	-2.11726540992971	0.034237328807995	0.948290073325099
ENSMUSG00000037446	Tulp1	2	2	1	2	3	0	0	19	1.6946840752502	2.08833520376378	1.04283497626293	1.96817430294527	3.2184634847597	0	0	19.1220485937172	3.64181757958738	-2.45769998453804	1.15626054019536	-2.12555898874036	0.03353999746891	0.948290073325099
ENSMUSG00000044597	Mycs	0	0	0	1	3	2	0	3	0	0	0	0.984087151472637	3.2184634847597	2.04351580996523	0	3.01927083058692	1.15816715959806	-3.36744013561621	1.5895813028549	-2.11844473105482	0.034137420980716	0.948290073325099
ENSMUSG00000032743	D430042O09Rik	1231	933	816	998	718	798	1015	930	1043.0780483165	974.208372555801	850.95334063055	982.118977169692	770.285594019154	815.362808176126	981.019843395678	935.973957481946	919.125117718181	0.201361208337422	0.095206316444428	2.11499841457427	0.03443008244067	0.949015497480013
ENSMUSG00000037415	Ranbp10	1893	1548	1498	1566	1170	1454	1536	1431	1604.01847722431	1616.37144771316	1562.16679444187	1541.08047920615	1255.20075905628	1485.63599384472	1484.57781227169	1440.19218618996	1498.65549374352	0.16384389370461	0.077448503891453	2.11552044871316	0.034385613968783	0.949015497480013
ENSMUSG00000030417	Pdcd5	1167	1025	1074	1095	1348	1119	1227	1171	988.848157908492	1070.27179192893	1120.00476450639	1077.57543086254	1446.16292581869	1143.34709567554	1185.92251019359	1178.52204753909	1151.33184055416	-0.206449727966666	0.097613808018208	-2.11496439036736	0.034432982431922	0.949015497480013
ENSMUSG00000106926	Rpl7-ps7	24	39	25	43	64	51	35	34	20.3362089030024	40.7225364733936	26.0708744065732	42.3157475133234	68.6605543415402	52.1096531541133	33.8282704619199	34.2184027466518	39.7827810000647	-0.664659889272945	0.314173427248324	-2.11558276934603	0.034380308586134	0.949015497480013
ENSMUSG00000104802	Gm5869	152	267	89	209	436	283	214	242	128.795989719015	278.792749702464	92.8123128874007	205.674214657781	467.750026451743	289.15748711008	206.83571082431	243.554513667345	239.171625627517	-0.869271824961552	0.411105042102606	-2.1144761944919	0.034474615902863	0.949247588747322
ENSMUSG00000030282	Cmas	4752	3778	3881	3665	4524	4327	4517	4171	4026.56936279448	3944.86519990977	4047.24254287643	3606.67941014722	4853.44293501762	4421.14645485977	4365.77993361406	4197.79287812602	4182.93983966817	-0.167479092708678	0.079256499168318	-2.11312756008817	0.03458985136462	0.950588982550193
ENSMUSG00000096975	NA	21	20	14	17	24	30	25	35	17.7941827901271	20.8833520376378	14.599689667681	16.7294815750348	25.7477078780776	30.6527371494784	24.1630503299428	35.2248263568474	23.2243784731034	-0.698742041912307	0.330638031912143	-2.11331418189053	0.034573885682531	0.950588982550193
ENSMUSG00000059195	Gm12715	443	414	266	381	508	411	391	398	375.372522667919	432.285387179102	277.394103685939	374.937204711075	544.993150085976	419.942498947854	377.910107160305	400.556596857865	400.423946412004	-0.307370435043923	0.145507830294526	-2.1123978992867	0.034652335039384	0.951391342709554
ENSMUSG00000101392	Gm29163	10	1	8	4	0	1	5	2	8.473420376251	1.04416760188189	8.34267981010344	3.93634860589055	0	1.02175790498261	4.83261006598856	2.01284722039128	3.70797894818617	2.38370930820792	1.12884396007664	2.11163756241924	0.034717548171713	0.952267029074585
ENSMUSG00000015340	Cybb	56	31	39	45	29	16	20	18	47.4511541070056	32.3691956583385	40.6705640742542	44.2839218162687	31.1118136860104	16.3481264797218	19.3304402639542	18.1156249835215	31.2101051336344	0.759116999224945	0.360307383722682	2.10685940260723	0.0351297685572	0.954226459942332
ENSMUSG00000113157	Gm48693	54	44	46	39	28	24	38	32	45.7564700317554	45.9433744828031	47.9704089080948	38.3793989074329	30.0389925244238	24.5221897195827	36.727836501513	32.2055555262605	37.6930283252333	0.570252113765346	0.2706427889424	2.10702866310881	0.035115095088242	0.954226459942332
ENSMUSG00000017756	Slc12a7	675	415	285	403	302	227	279	315	571.955875396943	433.329554780983	297.207968234935	396.587122043473	323.991990799143	231.939044431053	269.659641682162	317.023437211627	355.21182932254	0.43776462920775	0.207587843312251	2.10881630746205	0.034960440443555	0.954226459942332
ENSMUSG00000059022	Kcp	220	226	172	167	127	147	216	177	186.415248277522	235.981878025307	179.367615917224	164.34255429593	136.248287521494	150.198412032444	208.768754850706	178.136979004628	179.932466240657	0.330269389999784	0.156594713401362	2.10907113545579	0.034938441913625	0.954226459942332
ENSMUSG00000021223	Papln	205	177	172	154	100	144	159	147	173.705117713146	184.817665533094	179.367615917224	151.549421326786	107.282116158657	147.133138317496	153.677000098436	147.944270698759	155.68454322045	0.32787025149239	0.155573869145212	2.10748921585512	0.035075195502187	0.954226459942332
ENSMUSG00000102543	Pcdhgc5	644	541	471	492	311	461	503	476	545.688272230565	564.894672618101	491.17527381984	484.170878524538	333.647381253422	471.030394196985	486.160572638449	479.057638453125	481.978135466878	0.264785627926039	0.1257363744392	2.10587929791213	0.035214838371386	0.954226459942332
ENSMUSG00000066191	Anks6	653	600	413	529	389	439	546	471	553.31435056919	626.500561129133	430.69084519659	520.582103129025	417.327431857174	448.551720287367	527.721019205951	474.025520402147	499.839193972072	0.251588266292608	0.119330969621457	2.10832332202359	0.035003031955675	0.954226459942332
ENSMUSG00000032034	Kcnj5	526	408	450	499	374	335	481	434	445.701911790803	426.02038156781	469.275739318318	491.059488584846	401.235114433376	342.288898169176	464.897088348099	436.787846824908	434.658308629667	0.22344636203271	0.106080505586988	2.10638477631953	0.035170942602827	0.954226459942332
ENSMUSG00000015127	Unkl	1073	902	767	812	676	700	912	823	909.198006371732	941.839176897463	799.854426793667	799.078766995782	725.227105232519	715.230533487829	881.468076036313	828.286631191012	825.02284037579	0.195982258816794	0.093089045496053	2.10532031747068	0.035263434695915	0.954226459942332
ENSMUSG00000042766	Trim46	3129	2634	2581	2614	2221	2330	2620	2466	2651.33323572894	2750.33746335689	2691.55707373462	2572.40381394947	2382.73579988376	2380.69591860949	2532.287674578	2481.84062274245	2555.39895032295	0.128042722406117	0.060750678858031	2.107675581788	0.035059060854492	0.954226459942332
ENSMUSG00000063953	Amd2	49	69	50	60	98	74	48	55	41.5197598436299	72.0475645298502	52.1417488131465	59.0452290883582	105.136473835483	75.6100849687134	46.3930566334902	55.3532985607602	63.405902034179	-0.539521614857411	0.255863460211881	-2.10863096438481	0.034976447978496	0.954226459942332
ENSMUSG00000113052	Gm31513	45	21	27	35	62	32	28	42	38.1303916931295	21.9275196395196	28.1565443590991	34.4430503015423	66.5149120183671	32.6962529594436	27.0626163695359	42.2697916282169	36.4001348711068	-0.646561944663697	0.30695450565762	-2.1063771104402	0.035171607959212	0.954226459942332
ENSMUSG00000059776	Rpl13-ps6	20	26	12	24	43	30	29	30	16.946840752502	27.1483576489291	12.5140197151552	23.6180916353433	46.1313099482223	30.6527371494784	28.0291383827336	30.1927083058692	26.9041504422791	-0.719401002193905	0.341755356568413	-2.10501748799918	0.035289785807321	0.954226459942332
ENSMUSG00000082826	Mif-ps3	23	26	12	21	56	28	23	20	19.4888668653773	27.1483576489291	12.5140197151552	20.6658301809254	60.0779850488477	28.6092213395132	22.2300063035474	20.1284722039128	26.357844913276	-0.825713341981621	0.391280219016912	-2.11028644396136	0.034833690526659	0.954226459942332
ENSMUSG00000026832	Cytip	5	14	6	3	5	4	10	59	4.2367101881255	14.6183464263464	6.25700985757758	2.95226145441791	5.36410580793283	4.08703161993045	9.66522013197712	59.3789930015428	13.3199598109813	-1.61373624824823	0.766484305046608	-2.10537415785716	0.035258751461358	0.954226459942332
ENSMUSG00000060862	Zbtb40	493	502	495	582	293	346	505	528	417.739624549174	524.172136144708	516.20331325015	572.738722157075	314.336600344864	353.528235123984	488.093616664844	531.391666183298	464.775489302262	0.33214238359016	0.157886780579403	2.10367443285172	0.035406856176855	0.955710069164084
ENSMUSG00000025324	Atp10a	606	511	571	663	375	417	720	613	513.489274800811	533.569644561645	595.458771446133	652.449781426359	402.307935594962	426.07304637775	695.895849502352	616.937673049928	554.522747094992	0.311323774187179	0.14799424018768	2.10362088276118	0.035411530850732	0.955710069164084
ENSMUSG00000043259	Fam13c	1400	1180	1204	1242	891	1127	1220	1121	1186.27885267514	1232.11777022063	1255.57331142057	1222.23624212902	955.88365497363	1151.52115891541	1179.15685610121	1128.20086702931	1163.87108918311	0.171222816668812	0.08141068844896	2.10319824007088	0.035448444076164	0.95580375484985
ENSMUSG00000075707	Dio3	14	9	9	7	3	3	2	1	11.8627885267514	9.39750841693699	9.38551478636636	6.88861006030846	3.2184634847597	3.06527371494784	1.93304402639542	1.00642361019564	5.84470332833273	1.71004701493561	0.814369232308877	2.09984236522213	0.035742710109759	0.960663848045224
ENSMUSG00000040569	Slc26a7	185	126	98	77	78	34	52	31	156.758276960644	131.565117837118	102.197827673767	75.7747106633931	83.6800506037522	34.7397687694089	50.259144686281	31.1991319160649	83.2717536388035	1.05293825819047	0.501535273361844	2.09943011811016	0.035779002041618	0.960663848045224
ENSMUSG00000021591	Glrx	718	647	694	735	842	766	780	732	608.391583014822	675.576438417581	723.727473526473	723.304056332388	903.315418055889	782.666555216682	753.887170294215	736.702082663209	738.446347190157	-0.212723461158412	0.101288120978039	-2.10018173014122	0.035712857885566	0.960663848045224
ENSMUSG00000078184	Rbm8a2	39	35	19	42	61	50	36	36	33.0463394673789	36.5458660658661	19.8138645489957	41.3316603618508	65.4420908567805	51.0878952491307	34.7947924751176	36.2312499670431	39.7867198740204	-0.616891706828185	0.29373902064569	-2.10013537007153	0.035716934693045	0.960663848045224
ENSMUSG00000095526	Gm10243	17	30	19	31	45	35	37	42	14.4048146396267	31.3250280564566	19.8138645489957	30.5067016956518	48.2769522713955	35.7615266743915	35.7613144883153	42.2697916282169	32.2649992503812	-0.68045466591707	0.324145098972489	-2.09922861111906	0.035796753023623	0.960663848045224
ENSMUSG00000038963	Slco4a1	230	183	141	138	130	130	187	131	194.888668653773	191.082671144385	147.039731653073	135.804026903224	139.466751006254	132.82852764774	180.739616467972	131.841492935629	156.711435801506	0.336931458706492	0.160538653734641	2.09875597476615	0.035838417573277	0.960879749213721
ENSMUSG00000024650	Slc22a6	251	222	39	76	35	21	27	50	212.6828514439	231.805207617779	40.6705640742542	74.7906235119204	37.5487406555298	21.4569160046349	26.0960943563382	50.321180509782	86.9215222717673	1.68563530639145	0.803828634991458	2.09700828387304	0.035992842037475	0.961845730235908
ENSMUSG00000028108	Ecm1	327	267	182	184	142	197	226	179	277.080846303408	278.792749702464	189.795965679853	181.072035870965	152.340604945292	201.286307281575	218.433974982683	180.14982622502	209.869038873907	0.364788642853083	0.173931102067636	2.09731691754145	0.035965530254813	0.961845730235908
ENSMUSG00000055322	Tns1	3057	2458	1898	2114	1640	2012	2160	1976	2590.32460901993	2566.56396542568	1979.30078494704	2080.36023821316	1759.42670500197	2055.77690482502	2087.68754850706	1988.69305374659	2138.5167262108	0.224905265734963	0.107212493852675	2.09775239482829	0.035927023814892	0.961845730235908
ENSMUSG00000097504	4930516B21Rik	494	378	407	374	314	361	423	338	418.586966586799	394.695353511354	424.433835339012	368.048594650766	336.865844738182	368.854603698723	408.838811582632	340.171180246126	382.561898794199	0.208920324431253	0.099636504269917	2.09682511406947	0.036009059562381	0.961845730235908
ENSMUSG00000071178	Serpina1b	163	3	7	2	4	3	2	2	138.116752132891	3.13250280564566	7.29984483384051	1.96817430294527	4.29128464634626	3.06527371494784	1.93304402639542	2.01284722039128	20.2274654604254	3.29150340312104	1.57042279455464	2.09593455630812	0.036087996755892	0.962155816492688
ENSMUSG00000047965	Rpl9-ps7	164	296	120	271	496	398	297	272	138.964094170516	309.073610157039	125.140197151552	266.687618049085	532.119296146937	406.65964618308	287.05703791972	273.747221973214	292.431090218893	-0.842804260667538	0.402048974051226	-2.09627263110527	0.036058013152158	0.962155816492688
ENSMUSG00000023046	Igfbp6	232	151	89	72	68	41	45	37	196.583352729023	157.669307884165	92.8123128874007	70.8542749060299	72.9518389878865	41.8920741042872	43.493490593897	37.2376735772387	89.186790708741	1.14892342890749	0.54857245386977	2.09438775279854	0.036225452868094	0.96312527295163
ENSMUSG00000040940	Arhgef1	3451	2928	2435	2555	2058	2407	2717	2524	2924.17737184422	3057.32273831017	2539.30316720023	2514.34267201259	2207.86595054515	2459.37127729315	2626.04030985818	2540.2131921338	2608.57958489969	0.185505013426284	0.088542684515044	2.09509136121533	0.036162871738614	0.96312527295163
ENSMUSG00000104284	Gm10862	10	5	17	14	15	41	30	32	8.473420376251	5.22083800940944	17.7281945964698	13.7772201206169	16.0923174237985	41.8920741042872	28.9956603959314	32.2055555262605	20.5481600691281	-1.02197353536331	0.487922156145599	-2.09454217745821	0.036211709955502	0.96312527295163
ENSMUSG00000089646	Gm15796	3	12	1	9	30	10	8	9	2.5420261128753	12.5300112225827	1.04283497626293	8.85678436325374	32.184634847597	10.2175790498261	7.73217610558169	9.05781249176076	10.5204823962175	-1.39569689850082	0.666707384334911	-2.093417489133	0.036311902550792	0.964526474725089
ENSMUSG00000052825	Gm9892	50	70	43	78	98	85	56	61	42.367101881255	73.0917321317321	44.841903979306	76.7587978148657	105.136473835483	86.8494219235221	54.1252327390719	61.3918402219341	68.0703130658963	-0.537990349077949	0.257058783565002	-2.09286896023107	0.036360853775157	0.964929955197558
ENSMUSG00000026478	Lamc1	1833	1433	1108	1281	881	1205	1367	1239	1553.17795496681	1496.29217349675	1155.46115369933	1260.61564103645	945.155443357765	1231.21827550405	1321.23559204127	1246.9588530324	1276.26438589185	0.250395377383821	0.119666037560418	2.09245147987289	0.036398147786894	0.9650236195707
ENSMUSG00000029287	Tgfbr3	788	649	485	521	414	444	454	470	667.705525648579	677.664773621345	505.774963487521	512.709405917244	444.147960896838	453.66050981228	438.800993991761	473.019096791951	521.68540377094	0.295131671212969	0.141141256899249	2.09103757254793	0.036524696035874	0.967481313624947
ENSMUSG00000076858	Trav3-4	5	7	0	2	0	1	4	0	4.2367101881255	7.30917321317321	0	1.96817430294527	0	1.02175790498261	3.86608805279085	0	2.30023795775218	3.23300999763881	1.55544955503632	2.07850520588778	0.037662851915986	0.967585375506244
ENSMUSG00000022868	Ahsg	1137	31	41	13	22	20	10	31	963.427896779739	32.3691956583385	42.7562340267801	12.7931329691443	23.6020655549045	20.4351580996523	9.66522013197712	31.1991319160649	142.031004392075	3.08121464932688	1.48487656777745	2.07506449774396	0.037980557528167	0.967585375506244
ENSMUSG00000024295	Cyp4f41-ps	14	9	9	12	3	6	13	5	11.8627885267514	9.39750841693699	9.38551478636636	11.8090458176716	3.2184634847597	6.13054742989568	12.5647861715703	5.0321180509782	8.67509658561628	1.19745191232545	0.577687523978351	2.07283671989137	0.038187477819917	0.967585375506244
ENSMUSG00000032232	Cgnl1	1049	1337	669	668	487	654	716	504	888.86179746873	1396.05208371608	697.6565991199	657.370217183722	522.463905692658	668.229669858629	692.029761449562	507.237499538603	753.737691753486	0.614147028361141	0.295558554626717	2.07791998826355	0.037716729185909	0.967585375506244
ENSMUSG00000089707	Slain1os	65	57	47	51	27	47	52	33	55.0772324456315	59.5175533072676	49.0132438843577	50.1884447251045	28.9661713628373	48.0226215341828	50.259144686281	33.2119791364561	46.7820488852648	0.521980754368865	0.251765485025845	2.07328162680949	0.038146077583393	0.967585375506244
ENSMUSG00000040812	Agbl2	123	100	84	94	54	66	71	78	104.223070627887	104.416760188189	87.5981380060861	92.5041922384279	57.9323427256746	67.4360217288525	68.6230629370375	78.50104159526	82.6543287559268	0.427836169506603	0.205670470798603	2.08020221787478	0.037506988911435	0.967585375506244
ENSMUSG00000097379	Gm26873	94	94	84	94	59	72	93	68	79.6501515367594	98.1517545768974	87.5981380060861	92.5041922384279	63.2964485336074	73.5665691587482	89.8865472273872	68.4368054933036	81.6363258464021	0.384982109848895	0.184532473939636	2.08625669850841	0.036955376780318	0.967585375506244
ENSMUSG00000021760	Gpx8	176	155	104	157	108	104	120	98	149.132198622018	161.845978291693	108.454837531345	154.501682781204	115.864685451349	106.262822118192	115.982641583725	98.6295137991728	126.334295022337	0.369641154048799	0.178019820236298	2.0764044900065	0.037856556337332	0.967585375506244
ENSMUSG00000089736	Tgfbr3l	325	194	211	201	142	200	196	159	275.386162228158	202.568514765086	220.038179991478	197.801517446	152.340604945292	204.351580996523	189.438314586752	160.021354021107	200.243278622549	0.33533262687089	0.160941793156392	2.08356462478976	0.037199787600611	0.967585375506244
ENSMUSG00000036103	Colec12	663	476	350	448	318	321	346	379	561.787770945441	497.023778495779	364.992241692025	440.871043859742	341.157129384528	327.984287499419	334.416616566408	381.434548264148	406.208427088436	0.329683280711612	0.157793661468043	2.08933158432591	0.036677885134058	0.967585375506244
ENSMUSG00000029814	Igf2bp3	262	203	204	245	122	213	209	171	222.003613857776	211.966023182023	212.738335157638	241.101352110796	130.884181713561	217.634433761297	202.003100758322	172.098437343455	201.303684735608	0.327588855943795	0.156986758142497	2.08672922366129	0.036912618057403	0.967585375506244
ENSMUSG00000026896	Ifih1	252	192	145	168	126	151	173	141	213.530193481525	200.480179561322	151.211071558125	165.326641447403	135.175466359907	154.285443652375	167.208308283204	141.905729037585	166.140379172681	0.322191649318244	0.154804338167657	2.08128307728239	0.03740800319333	0.967585375506244
ENSMUSG00000018844	Fndc8	230	168	196	191	121	145	176	175	194.888668653773	175.420157116157	204.395655347534	187.960645931274	129.811360551974	148.154896222479	170.107874322797	176.124131784237	173.357923741278	0.300229427183708	0.144392279771314	2.07926232385281	0.037593246042959	0.967585375506244
ENSMUSG00000031822	Gse1	2127	1501	1322	1581	956	1357	1526	1492	1802.29651402859	1567.29557042471	1378.62783861959	1555.84178647824	1025.61703047676	1386.52547706141	1474.91259213971	1501.5840264119	1461.58760445511	0.254087103328234	0.122446352342516	2.07508920002356	0.037978268488857	0.967585375506244
ENSMUSG00000045672	Col27a1	524	548	467	484	367	393	545	477	444.007227715552	572.203845831274	487.003933914788	476.298181312756	393.72536630227	401.550856658167	526.754497192753	480.064062063321	472.70099637386	0.236039632021715	0.113838293129004	2.07346425823717	0.038129094104561	0.967585375506244
ENSMUSG00000022565	Plec	9310	7515	5977	6482	4634	6435	7070	6385	7888.75437028968	7846.91952814239	6233.02465312353	6378.85291584563	4971.45326279215	6575.01211856312	6833.31063330782	6426.01475109916	6644.16777914544	0.232023739011588	0.111495441324754	2.08101547699847	0.037432489447104	0.967585375506244
ENSMUSG00000048148	Nwd1	3328	2801	2356	3003	1803	2463	2986	2730	2819.95430121633	2924.71345287117	2456.91920407546	2955.21371587233	1934.29655434058	2516.58971997218	2886.03473140837	2747.5364558341	2655.15726694881	0.226946943068465	0.109104889136851	2.08008041494643	0.037518157654719	0.967585375506244
ENSMUSG00000020654	Adcy3	2962	2138	2113	2228	1633	1938	2099	2134	2509.82711544555	2232.43033282348	2203.51030484357	2192.54617348104	1751.91695687086	1980.1668198563	2028.729705702	2147.7079841575	2130.85442414754	0.188503189064778	0.090768199756945	2.07675363805324	0.037824303229852	0.967585375506244
ENSMUSG00000000325	Arvcf	2345	2070	1828	1938	1508	1726	2112	1940	1987.01707823086	2161.42693589551	1906.30233660863	1907.16089955397	1617.81431167254	1763.55414399999	2041.29449187357	1952.46180377954	1917.12900020183	0.16991635042606	0.081732087090477	2.07894300114915	0.037622589715085	0.967585375506244
ENSMUSG00000044864	Ankrd50	3329	2500	2573	2896	1992	2470	2645	2548	2820.80164325396	2610.41900470472	2683.21439392452	2849.91639066476	2137.05975388044	2523.74202530706	2556.45072490795	2564.36735877849	2593.24641192774	0.167020362780087	0.080333841150388	2.07907851023105	0.037610134935497	0.967585375506244
ENSMUSG00000047731	Wbp1l	1728	1445	1334	1362	1150	1269	1519	1337	1464.20704101617	1508.82218471933	1391.14185833475	1340.32670030573	1233.74433582455	1296.61078142294	1468.14693804732	1345.58836683157	1381.0735258128	0.15084981176966	0.072733227011139	2.07401510930565	0.038077907645248	0.967585375506244
ENSMUSG00000069662	Marcks	8320	7078	7138	6757	8002	7780	8251	7770	7049.88575304083	7390.61828612	7443.75606056479	6649.47688250061	8584.7149350157	7949.27650076473	7974.77313089432	7819.91145122013	7607.80162501514	-0.152883660657347	0.073562156329216	-2.078292267197	0.037682448245659	0.967585375506244
ENSMUSG00000049517	Rps23	7549	6040	6425	6673	8220	6812	6350	6332	6396.58504203188	6306.7723153666	6700.21472248932	6566.81356177691	8818.58994824157	6960.21484874156	6137.41478380547	6372.6742997588	6782.40994027651	-0.201367154753665	0.096988199959283	-2.07620261885674	0.037875215177721	0.967585375506244
ENSMUSG00000016833	Mrps18c	636	514	579	586	716	599	591	588	538.909535929564	536.70214736729	603.801451256236	576.675070762965	768.139951695981	612.032985084585	571.214509799848	591.777082795037	599.906591836438	-0.216780645639219	0.104529516177284	-2.07387017147917	0.038091369962664	0.967585375506244
ENSMUSG00000047721	Bola2	922	794	759	803	1047	842	811	798	781.249358690342	829.069075894219	791.511746983563	790.221982632528	1123.24375618113	860.320155995361	783.849352703344	803.126040936121	845.323933752077	-0.223770871059732	0.107482841624381	-2.08192179959049	0.037349613222922	0.967585375506244
ENSMUSG00000022450	Ndufa6	2436	2075	2047	2226	2901	2274	2279	2105	2064.12520365474	2166.64777390492	2134.68319641022	2190.57799917809	3112.25418976263	2323.47747593046	2202.70366807759	2118.52169946182	2289.12390079756	-0.226624459216362	0.109324803946805	-2.07294640406246	0.038177267754908	0.967585375506244
ENSMUSG00000084786	Ubl5	2404	2171	2070	2099	2846	2238	2092	2076	2037.01025845074	2266.88786368558	2158.66840086426	2065.59893094107	3053.24902587537	2286.69419135109	2021.96405160961	2089.33541476615	2247.42601719298	-0.230887617415656	0.111092348447353	-2.07833951341009	0.037678099520731	0.967585375506244
ENSMUSG00000021606	Ndufs6	1670	1651	1445	1467	2079	1637	1627	1530	1415.06120283392	1723.920710707	1506.89654069993	1443.65585121036	2230.39519493847	1672.61769045654	1572.53131547268	1539.82812359933	1638.11332873978	-0.243542550752229	0.117071112560852	-2.0802958597121	0.037498404328776	0.967585375506244
ENSMUSG00000020703	5530401A14Rik	68	32	74	49	63	82	54	79	57.6192585585068	33.4133632602204	77.1697882434568	48.2202704221592	67.5877331799537	83.7841482085743	52.1921887126764	79.5074652054556	62.4367769738754	-0.518705359442807	0.248364730745925	-2.0884823617466	0.036754344841029	0.967585375506244
ENSMUSG00000082044	Snrpert	50	47	29	69	91	68	61	55	42.367101881255	49.0758772884487	30.242214311625	67.902013451612	97.6267257043775	69.4795375388177	58.9578428050604	55.3532985607602	58.8755764427446	-0.57459715687062	0.276224001285345	-2.08018548061307	0.037508523470209	0.967585375506244
ENSMUSG00000082536	Gm13456	1063	1416	758	1368	2195	1470	1280	1363	900.724585995481	1478.54132426475	790.4689120073	1346.23122321457	2354.84244968251	1501.98412032444	1237.14817689307	1371.75538069666	1372.71202163485	-0.599055098493976	0.287486800954808	-2.08376557290415	0.037181496305526	0.967585375506244
ENSMUSG00000083325	Gm14121	44	62	24	42	70	60	34	48	37.2830496555044	64.738391316677	25.0280394303103	41.3316603618508	75.0974813110596	61.3054742989568	32.8617484487222	48.3083332893907	48.244272264059	-0.614193036736001	0.29562151372628	-2.07763308222788	0.037743166746637	0.967585375506244
ENSMUSG00000050900	Gm7327	27	39	22	33	56	39	27	35	22.8782350158777	40.7225364733936	22.9423694777844	32.474875998597	60.0779850488477	39.8485582943219	26.0960943563382	35.2248263568474	35.033185127751	-0.636451115327025	0.305107511343179	-2.08598966484033	0.036979559261209	0.967585375506244
ENSMUSG00000111246	4930517E14Rik	25	18	12	22	31	32	23	27	21.1835509406275	18.795016833874	12.5140197151552	21.649917332398	33.2574560091835	32.6962529594436	22.2300063035474	27.1734374752823	23.6874571961889	-0.681266177523966	0.327354533717112	-2.08112644657212	0.037422333732852	0.967585375506244
ENSMUSG00000109905	Gm7380	20	25	15	31	50	31	31	31	16.946840752502	26.1041900470472	15.6425246439439	30.5067016956518	53.6410580793283	31.674495054461	29.9621824091291	31.1991319160649	29.459640574766	-0.704175730897766	0.339184202426542	-2.07608646234127	0.037885955006272	0.967585375506244
ENSMUSG00000058581	Gm5801	23	33	10	19	33	34	20	32	19.4888668653773	34.4575308621023	10.4283497626293	18.6976558779801	35.4030983323567	34.7397687694089	19.3304402639542	32.2055555262605	25.5939082825087	-0.738066617714067	0.35549712173425	-2.07615356803312	0.037879750099736	0.967585375506244
ENSMUSG00000059751	Rps3a3	118	162	71	171	309	198	153	150	99.9863604397618	169.155151504866	74.041283314668	168.278902901821	331.501738930249	202.308065186557	147.87786801925	150.963541529346	168.014113978315	-0.791481557898375	0.381242404921618	-2.07605855928094	0.037888535308371	0.967585375506244
ENSMUSG00000043223	Gm4835	29	27	7	24	46	46	33	25	24.5729190911279	28.192525250811	7.29984483384051	23.6180916353433	49.349773432982	47.0008636292002	31.8952264355245	25.160590254891	29.6362293204651	-0.804021978536982	0.387147455028119	-2.07678487381141	0.037821418916371	0.967585375506244
ENSMUSG00000081491	Gm12778	24	20	11	27	47	34	18	17	20.3362089030024	20.8833520376378	11.4711847388922	26.5703530897612	50.4225945945686	34.7397687694089	17.3973962375588	17.1092013733259	24.8662574680195	-0.812504193204461	0.390470336317289	-2.08083461823905	0.037449046307095	0.967585375506244
ENSMUSG00000092281	Hmgb1-ps7	21	19	11	26	54	33	30	19	17.7941827901271	19.8391844357559	11.4711847388922	25.5862659382886	57.9323427256746	33.7180108644262	28.9956603959314	19.1220485937172	26.8073600603516	-0.827475623706073	0.397704763741797	-2.0806278907016	0.037467978978183	0.967585375506244
ENSMUSG00000087263	Gm15726	11	8	11	11	12	27	20	26	9.3207624138761	8.3533408150551	11.4711847388922	10.824958666199	12.8738539390388	27.5874634345306	19.3304402639542	26.1670138650867	15.7411272670791	-0.908401844021758	0.438147362783488	-2.07327926899026	0.038146296886573	0.967585375506244
ENSMUSG00000103751	Gm37283	7	9	7	8	12	14	4	15	5.9313942633757	9.39750841693699	7.29984483384051	7.8726972117811	12.8738539390388	14.3046106697566	3.86608805279085	15.0963541529346	9.58029394255689	-1.04478125884219	0.503954247556846	-2.07316688748483	0.038156750848773	0.967585375506244
ENSMUSG00000097148	Gm3839	7	11	5	7	23	10	10	14	5.9313942633757	11.4858436207008	5.21417488131465	6.88861006030846	24.674886716491	10.2175790498261	9.66522013197712	14.089930542739	11.0209549083416	-1.06031081698484	0.507842210576828	-2.08787453051705	0.036809154221078	0.967585375506244
ENSMUSG00000101219	Gm20302	4	6	1	12	14	13	6	12	3.3893681505004	6.26500561129133	1.04283497626293	11.8090458176716	15.0194962622119	13.282852764774	5.79913207918627	12.0770833223477	8.58560237303077	-1.2509000934306	0.603236695610288	-2.07364721432451	0.03811208688183	0.967585375506244
ENSMUSG00000081552	Gm12328	4	4	3	10	16	8	5	11	3.3893681505004	4.17667040752755	3.12850492878879	9.84087151472637	17.1651385853851	8.17406323986091	4.83261006598856	11.070659712152	7.72223582561621	-1.25767356501814	0.601912521100348	-2.08946237356719	0.036666121581743	0.967585375506244
ENSMUSG00000104929	Gm42766	2	4	3	4	12	18	16	12	1.6946840752502	4.17667040752755	3.12850492878879	3.93634860589055	12.8738539390388	18.391642289687	15.4643522111634	12.0770833223477	8.96789247246175	-1.35050977800836	0.649701543839182	-2.07866179604253	0.037648446764592	0.967585375506244
ENSMUSG00000112822	A130012E19Rik	5	1	3	3	10	11	7	7	4.2367101881255	1.04416760188189	3.12850492878879	2.95226145441791	10.7282116158657	11.2393369548087	6.76565409238398	7.04496527136948	5.89247651345525	-1.40037297887253	0.67238753933365	-2.08268728516344	0.037279737170452	0.967585375506244
ENSMUSG00000110068	Gm45294	1	1	2	1	2	7	2	7	0.8473420376251	1.04416760188189	2.08566995252586	0.984087151472637	2.14564232317313	7.15230533487829	1.93304402639542	7.04496527136948	2.90465296241523	-1.99875480055262	0.963665553300731	-2.07411668260479	0.038068475583826	0.967585375506244
ENSMUSG00000097122	NA	0	0	2	0	4	4	0	2	0	0	2.08566995252586	0	4.29128464634626	4.08703161993045	0	2.01284722039128	1.55960417989923	-3.11665092520413	1.49549531412584	-2.08402587140562	0.03715781402713	0.967585375506244
ENSMUSG00000078967	Gapdh-ps16	10	16	6	15	17	22	10	21	8.473420376251	16.7066816301102	6.25700985757758	14.7613072720896	18.2379597469716	22.4786739096175	9.66522013197712	21.1348958141085	14.7143960923379	-0.890439059360057	0.429995245640481	-2.07081140637669	0.038376423870074	0.971511577175001
ENSMUSG00000113242	Gm48016	3	5	1	1	0	0	1	0	2.5420261128753	5.22083800940944	1.04283497626293	0.984087151472637	0	0	0.966522013197712	0	1.34453853290225	3.49746955069987	1.69561689108429	2.06265316716878	0.039145592467765	0.974288265571664
ENSMUSG00000034739	Mfrp	31	477	30	32	21	24	33	25	26.2676031663781	498.06794609766	31.2850492878879	31.4907888471244	22.5292443933179	24.5221897195827	31.8952264355245	25.160590254891	86.4023297752959	2.36208872088962	1.14821520820114	2.05718292530735	0.039668633346435	0.974288265571664
ENSMUSG00000073010	Gm5127	10	11	5	5	1	2	2	2	8.473420376251	11.4858436207008	5.21417488131465	4.92043575736319	1.07282116158657	2.04351580996523	1.93304402639542	2.01284722039128	4.64451285674601	1.89888920580706	0.92190275634487	2.05975000371592	0.039422446405776	0.974288265571664
ENSMUSG00000051378	Kif18b	14	8	7	4	1	4	6	2	11.8627885267514	8.3533408150551	7.29984483384051	3.93634860589055	1.07282116158657	4.08703161993045	5.79913207918627	2.01284722039128	5.55301935782902	1.63985221866824	0.796748755000933	2.05817983194254	0.039572873871976	0.974288265571664
ENSMUSG00000039004	Bmp6	522	524	159	196	170	135	216	155	442.312543640302	547.143823386109	165.810761225806	192.881081688637	182.379597469716	137.937317172653	208.768754850706	155.995659580324	254.153692376782	0.972022654601998	0.47023981932817	2.0670785727817	0.038726750787459	0.974288265571664
ENSMUSG00000005628	Tmod4	28	16	17	14	12	11	19	4	23.7255770535028	16.7066816301102	17.7281945964698	13.7772201206169	12.8738539390388	11.2393369548087	18.3639182507565	4.02569444078256	14.8050596232608	0.956965782188687	0.463228679868424	2.06586039202172	0.038841663708498	0.974288265571664
ENSMUSG00000030004	Nat8	84	65	59	72	46	45	58	49	71.1767311605084	67.8708941223227	61.5272635995128	70.8542749060299	49.349773432982	45.9791057242176	56.0582767654673	49.3147568995864	59.0163845763284	0.443475456282273	0.215265153478539	2.06013583302271	0.039385557113922	0.974288265571664
ENSMUSG00000032332	Col12a1	562	473	329	402	236	409	685	400	476.206225145306	493.891275690133	343.092707190504	395.603034892	253.18579413443	417.898983137889	662.067579040433	402.569444078256	430.564380413619	0.405650557310013	0.197158549769257	2.0574839781727	0.039639694522698	0.974288265571664
ENSMUSG00000034687	Fras1	770	904	585	717	450	673	856	635	652.453368971327	943.927512101227	610.058461113814	705.590487605881	482.769522713955	687.643070053299	827.342843297241	639.078992474232	693.608032291372	0.309421077683836	0.150469951811924	2.05636456952275	0.039747388742751	0.974288265571664
ENSMUSG00000102748	Pcdhgb2	377	232	235	254	170	235	261	219	319.447948184663	242.246883636598	245.066219421788	249.95813647405	182.379597469716	240.113107670914	252.262245444603	220.406770632845	243.985113616897	0.290290984644846	0.140824363431913	2.06136905270087	0.039267844969443	0.974288265571664
ENSMUSG00000053877	Srcap	501	400	336	380	232	310	391	388	424.518360850175	417.667040752755	350.392552024344	373.953117559602	248.894509488083	316.74495054461	377.910107160305	390.492360755909	362.571624891973	0.286455238053114	0.138542486643164	2.06763459350142	0.03867439656314	0.974288265571664
ENSMUSG00000079487	Med12	1964	1684	1256	1540	1047	1280	1712	1557	1664.1797618957	1758.3782415691	1309.80073018624	1515.49421326786	1123.24375618113	1307.85011837775	1654.68568659448	1567.00156107461	1487.57925864336	0.24590014316385	0.118891832086284	2.06826775943188	0.038614851690568	0.974288265571664
ENSMUSG00000078234	Klhdc7a	992	1040	759	952	611	817	880	786	840.563301324099	1085.93430595716	791.511746983563	936.850968201951	655.493729729392	834.776208370795	850.539371613986	791.048957613773	848.33982372434	0.244042188499999	0.118172313790548	2.06513844632462	0.038909902603981	0.974288265571664
ENSMUSG00000030536	Iqgap1	1436	1216	1047	1189	768	1059	1153	1110	1216.78316602964	1269.70780388838	1091.84822014729	1170.07962310097	823.926652098483	1082.04162137659	1114.39988121696	1117.13020731716	1110.73964689693	0.218169312360076	0.105659644118883	2.06483103534403	0.038938990240487	0.974288265571664
ENSMUSG00000021365	Nedd9	514	416	415	445	306	392	408	375	435.533807339301	434.373722382865	432.776515149116	437.918782405324	328.283275445489	400.529098753184	394.340981384666	377.408853823365	405.145629585414	0.21076018037241	0.101894083080021	2.06842413221278	0.038600157915304	0.974288265571664
ENSMUSG00000048120	Entpd1	468	381	434	421	333	330	439	386	396.556073608547	397.827856316999	452.590379698111	414.30069076998	357.249446808326	337.180108644262	424.303163793795	388.479513535517	396.060904146942	0.207625629818216	0.100386899411416	2.06825423472144	0.038616122781186	0.974288265571664
ENSMUSG00000016494	Cd34	659	527	537	506	448	485	523	417	558.398402794941	550.276326191755	560.002382253193	497.948098645154	480.623880390782	495.552583916568	505.491012902403	419.678645451582	508.496416568297	0.200304872238377	0.097061238995497	2.06369581010262	0.039046566871913	0.974288265571664
ENSMUSG00000034156	Tspoap1	13988	12184	10325	11150	8299	10356	11829	11027	11852.6204222999	12722.1380613289	10767.2711299147	10972.5717389199	8903.34282000691	10581.3248639999	11432.9888941157	11097.8331496273	11041.2613850267	0.180039488288346	0.08706269081996	2.06792928857043	0.038646672832763	0.974288265571664
ENSMUSG00000035713	Usp35	1806	1341	1301	1415	1097	1224	1275	1247	1530.29971995093	1400.22875412361	1356.72830411807	1392.48331933378	1176.88481426046	1250.63167569872	1232.31556682708	1255.01024191396	1324.32279952833	0.171749143980617	0.083350936093023	2.06055447042537	0.039345564181192	0.974288265571664
ENSMUSG00000023007	Prpf40b	3739	3031	3022	3108	2435	2788	3035	2954	3168.21187868025	3164.872001304	3151.44729826657	3058.54286677696	2612.31952846329	2848.66103909153	2933.39431005506	2972.97534451792	2988.80303339445	0.138640124421274	0.067250944019178	2.06153424971608	0.039252099447731	0.974288265571664
ENSMUSG00000061306	Slc38a10	3997	3352	3315	3241	2908	2927	3305	3046	3386.82612438752	3500.04980150809	3456.99794631161	3189.42645792282	3119.76393789373	2990.68538788411	3194.35525361844	3065.56631665592	3237.95890327278	0.129280046520065	0.06258418159818	2.06569844357963	0.038856962355225	0.974288265571664
ENSMUSG00000055707	Klhl26	2121	1659	1772	1792	1529	1581	1859	1649	1797.21246180284	1732.27405152205	1847.90357793791	1763.48417543897	1640.34355606586	1615.39924777751	1796.76442253455	1659.59253321261	1731.62175328654	0.125661296377277	0.061097900339859	2.05672037301255	0.039713131302325	0.974288265571664
ENSMUSG00000024038	Ndufv3	2305	1906	1795	1901	2480	2067	2145	1952	1953.12339672586	1990.18344918688	1871.88878239196	1870.74967494948	2660.59648073468	2111.97358959906	2073.18971830909	1964.53888710189	2062.03049737486	-0.202020480789837	0.098122701276318	-2.05885567928811	0.039508065923061	0.974288265571664
ENSMUSG00000062933	Gm10123	821	791	707	827	918	830	715	779	695.667812890207	825.936573088573	737.284328217891	813.840074267871	984.849826336468	848.059061135569	691.063239436364	784.003992342404	797.588113464418	-0.212833906405284	0.102982010270046	-2.06670957235324	0.038761528645375	0.974288265571664
ENSMUSG00000090862	Rps13	3695	2932	3220	3334	4314	3394	3476	3205	3130.92882902475	3061.49940871769	3357.92862356663	3280.94656300977	4628.15049108445	3467.84632951099	3359.63051787525	3225.58767067703	3439.06480418332	-0.220708396729627	0.106831819132982	-2.06594251151798	0.038833908150852	0.974288265571664
ENSMUSG00000113555	Gm10095	274	327	203	279	452	308	326	280	232.171718309277	341.442805815377	211.695500181375	274.560315260866	484.915165037128	314.701434734645	315.086176302454	281.798610854779	307.046465811988	-0.390270064494353	0.189620472961928	-2.05816417604186	0.039574376206931	0.974288265571664
ENSMUSG00000081051	Gm15427	160	176	112	152	260	149	123	147	135.574726020016	183.773497931212	116.797517341448	149.581247023841	278.933502012507	152.241927842409	118.882207623319	147.944270698759	160.466112061689	-0.453223681525289	0.219983668872546	-2.06026058137923	0.039373636145719	0.974288265571664
ENSMUSG00000112550	Gm6627	95	119	52	87	158	109	81	86	80.4974935743845	124.255944623945	54.2274187656723	85.6155821781194	169.505743530677	111.371611643105	78.2882830690147	86.5524304768251	98.7893134827179	-0.533398410844569	0.25909103240083	-2.05872972870542	0.039520136665927	0.974288265571664
ENSMUSG00000089764	Gm16580	31	39	36	40	58	59	41	38	26.2676031663781	40.7225364733936	37.5420591454655	39.3634860589055	62.2236273720208	60.2837163939742	39.6274025411062	38.2440971874343	43.0343160423348	-0.54939916601386	0.26708400003192	-2.05702762407407	0.039683568746918	0.974288265571664
ENSMUSG00000054986	Sec14l3	82	61	83	76	75	63	75	186	69.4820470852582	63.6942237147952	86.5553030298231	74.7906235119204	80.4615871189925	64.3707480139046	72.4891509898284	187.194791496389	87.3798093701139	-0.594410290459157	0.288528018869167	-2.0601475475028	0.039384437546425	0.974288265571664
ENSMUSG00000081611	Gm13651	30	42	23	27	59	53	43	33	25.420261128753	43.8550392790393	23.9852044540474	26.5703530897612	63.2964485336074	54.1531689640785	41.5604465675016	33.2119791364561	39.0066126441556	-0.638630060827932	0.309921566743876	-2.06061832849376	0.039339466775208	0.974288265571664
ENSMUSG00000086896	Cyp4x1os	18	12	18	26	31	26	18	28	15.2521566772518	12.5300112225827	18.7710295727327	25.5862659382886	33.2574560091835	26.565705529548	17.3973962375588	28.1798610854779	22.192485284078	-0.711814825314937	0.345075111239502	-2.06278228168388	0.039133318185891	0.974288265571664
ENSMUSG00000110313	Gm45420	3	8	8	10	16	15	14	19	2.5420261128753	8.3533408150551	8.34267981010344	9.84087151472637	17.1651385853851	15.3263685747392	13.531308184768	19.1220485937172	11.7779727739212	-1.02554463676475	0.498556765933138	-2.05702681588376	0.039683646483482	0.974288265571664
ENSMUSG00000105753	Gm43847	4	3	6	0	12	8	4	7	3.3893681505004	3.13250280564566	6.25700985757758	0	12.8738539390388	8.17406323986091	3.86608805279085	7.04496527136948	5.59223141459796	-1.49522622427571	0.725208555824554	-2.06178789848343	0.03922793370675	0.974288265571664
ENSMUSG00000108442	Rpl15-ps5	2	5	0	5	10	8	3	7	1.6946840752502	5.22083800940944	0	4.92043575736319	10.7282116158657	8.17406323986091	2.89956603959314	7.04496527136948	5.085345501089	-1.55898763776379	0.755538964378799	-2.06341130142186	0.039073567112728	0.974288265571664
ENSMUSG00000082844	Gm13537	3	3	1	1	9	3	1	6	2.5420261128753	3.13250280564566	1.04283497626293	0.984087151472637	9.65539045427909	3.06527371494784	0.966522013197712	6.03854166117384	3.42839736123188	-1.8406791391684	0.893338485866676	-2.06044983876706	0.039355556535695	0.974288265571664
ENSMUSG00000082951	Gm13359	2	2	2	0	7	4	0	4	1.6946840752502	2.08833520376378	2.08566995252586	0	7.50974813110596	4.08703161993045	0	4.02569444078256	2.68639542791985	-2.15345902702047	1.04712064044367	-2.05655293558919	0.039729249375128	0.974288265571664
ENSMUSG00000048424	Ranbp3l	321	205	100	103	75	79	87	83	271.996794077657	214.054358385787	104.283497626293	101.360976601682	80.4615871189925	80.7188744936265	84.0874151482009	83.5331596462382	127.56208288731	0.928506084559494	0.452108820677493	2.05372255990961	0.040002551774745	0.974542580560768
ENSMUSG00000032419	Tbx18	136	94	58	73	58	41	48	52	115.238517117014	98.1517545768974	60.4844286232499	71.8383620575025	62.2236273720208	41.8920741042872	46.3930566334902	52.3340277301733	68.5694810268294	0.592693892504377	0.288632646021919	2.05345410740325	0.040028556289001	0.974542580560768
ENSMUSG00000039911	Spsb1	554	521	541	475	391	419	572	486	469.427488844305	544.011320580463	564.173722158245	467.441396949503	419.473074180347	428.116562187715	552.850591549091	489.121874555081	491.827003875594	0.220120170814786	0.107088976540741	2.05548860326482	0.03983183533229	0.974542580560768
ENSMUSG00000003865	Gys1	891	856	713	744	624	634	830	735	754.981755523964	893.807467210896	743.541338075469	732.160840695642	669.440404830017	647.794511758977	802.213270954101	739.721353493796	747.957617817858	0.195169922010492	0.095055668291521	2.05321708340355	0.040051528299081	0.974542580560768
ENSMUSG00000036751	Cox6b1	4622	3868	3777	4080	5048	4483	4424	3869	3916.41489790321	4038.84028407914	3938.78770534508	4015.07557800836	5415.60122368898	4580.54068803706	4275.89338638668	3893.85294784693	4259.37583891193	-0.197603186797424	0.096240237372835	-2.05322838130488	0.04005043306968	0.974542580560768
ENSMUSG00000104882	Gm43096	16	19	16	23	45	21	23	26	13.5574726020016	19.8391844357559	16.6853596202069	22.6340044838707	48.2769522713955	21.4569160046349	22.2300063035474	26.1670138650867	23.8558636983124	-0.751472089633413	0.366021307380152	-2.05308290659956	0.04006453746997	0.974542580560768
ENSMUSG00000112926	Gm7172	301	479	199	414	791	570	516	476	255.049953325155	500.156281301424	207.524160276323	407.412080709672	848.601538814974	582.40200584009	498.725358810019	479.057638453125	472.366127191348	-0.768489545408047	0.374062635720887	-2.05444081290564	0.039933046350342	0.974542580560768
ENSMUSG00000105574	Gm43648	4	4	14	20	25	26	13	15	3.3893681505004	4.17667040752755	14.599689667681	19.6817430294527	26.8205290396641	26.565705529548	12.5647861715703	15.0963541529346	15.3618557686098	-1.07514127963291	0.523671908485873	-2.05308182892899	0.040064641970502	0.974542580560768
ENSMUSG00000107721	Gm44261	1	1	0	1	3	6	0	2	0.8473420376251	1.04416760188189	0	0.984087151472637	3.2184634847597	6.13054742989568	0	2.01284722039128	1.77968186575329	-2.70664163065761	1.31705716597179	-2.05506769226718	0.039872466926362	0.974542580560768
ENSMUSG00000106320	Gm42992	7	8	12	16	24	16	15	21	5.9313942633757	8.3533408150551	12.5140197151552	15.7453944235622	25.7477078780776	16.3481264797218	14.4978301979657	21.1348958141085	15.0340886983777	-0.891149286996596	0.434159224770597	-2.05258632352558	0.040112715084805	0.974882236257483
ENSMUSG00000039672	Kcne2	14	414	16	17	18	6	20	18	11.8627885267514	432.285387179102	16.6853596202069	16.7294815750348	19.3107809085582	6.13054742989568	19.3304402639542	18.1156249835215	67.556301310878	2.77472708082302	1.35301199183896	2.05077789225779	0.040288581445846	0.975350113617759
ENSMUSG00000032777	Gtf3c1	6040	4844	4441	4704	3426	4229	4889	4757	5117.9459072556	5057.94786351586	4631.23012958367	4629.14596052729	3675.48529959557	4321.01418017147	4725.32612252361	4787.55711370066	4618.20657210922	0.181324591551858	0.088397375950889	2.05124405109714	0.040243185985556	0.975350113617759
ENSMUSG00000029066	Mrpl20	1180	1011	1011	1019	1267	1111	1138	1061	999.863604397618	1055.65344550259	1054.30616100182	1002.78480735062	1359.26441173018	1135.17303243568	1099.902051019	1067.81545041757	1096.84537048188	-0.187519796969088	0.09144939855859	-2.05053067515745	0.040312673547611	0.975350113617759
ENSMUSG00000049775	Tmsb4x	9502	7428	9069	9023	10625	8944	8084	8543	8051.4440415137	7756.07694677866	9457.47039972851	8879.41836773761	11398.7248418573	9138.60270216449	7813.3639546903	8597.87690190136	8886.62226954649	-0.210770552862742	0.102785489673907	-2.05058664925783	0.040307217621789	0.975350113617759
ENSMUSG00000030647	Ndufc2	2970	2719	2770	2833	3696	2888	2949	2781	2516.60585174655	2839.09170951685	2888.65288424831	2787.91890012198	3965.14701322395	2950.83682958979	2850.27341692005	2798.86405995408	2949.67383316519	-0.221924728338016	0.108288468693151	-2.04938467609942	0.040424514485224	0.975350113617759
ENSMUSG00000115249	Gm49085	69	55	50	67	80	75	62	71	58.4666005961319	57.4292181035038	52.1417488131465	65.9338391486667	85.8256929269253	76.631842873696	59.9243648182581	71.4560763238905	65.9761729505274	-0.405517992580491	0.197921169735343	-2.04888639816924	0.040473224686003	0.975350113617759
ENSMUSG00000099492	Gm5525	118	195	84	179	353	202	147	166	99.9863604397618	203.612682366968	87.5981380060861	176.151600113602	378.705870040058	206.395096806488	142.078735940064	167.066319292476	182.699350375688	-0.821562718920302	0.400759119917461	-2.0500162768336	0.040362842478774	0.975350113617759
ENSMUSG00000071151	Gm4799	12	15	10	16	34	19	18	18	10.1681044515012	15.6625140282283	10.4283497626293	15.7453944235622	36.4759194939432	19.4134001946697	17.3973962375588	18.1156249835215	17.9258379469518	-0.829020929522681	0.404169783457457	-2.05116998710504	0.040250395582216	0.975350113617759
ENSMUSG00000108850	Gm44914	15	7	16	4	15	21	7	19	12.7101305643765	7.30917321317321	16.6853596202069	3.93634860589055	16.0923174237985	21.4569160046349	6.76565409238398	19.1220485937172	13.0097435147727	-0.993719320508764	0.484927158123097	-2.04921358571654	0.040441234176765	0.975350113617759
ENSMUSG00000104375	Gm6300	1	3	1	3	10	5	2	4	0.8473420376251	3.13250280564566	1.04283497626293	2.95226145441791	10.7282116158657	5.10878952491307	1.93304402639542	4.02569444078256	3.72133511023854	-1.75070354507816	0.854309693522803	-2.04926100962171	0.040436599120553	0.975350113617759
ENSMUSG00000085996	A830012C17Rik	7	10	3	10	0	4	6	2	5.9313942633757	10.4416760188189	3.12850492878879	9.84087151472637	0	4.08703161993045	5.79913207918627	2.01284722039128	5.15518220565222	1.77305036714546	0.867958888702075	2.04278150753987	0.041074071961029	0.976422353341142
ENSMUSG00000019997	Ccn2	578	249	140	138	103	97	107	103	489.763697747308	259.99773286859	145.99689667681	135.804026903224	110.500579643416	99.1105167833135	103.417855412155	103.661631850151	181.031617235621	1.12102805900706	0.548068596214657	2.04541560445109	0.040813901824844	0.976422353341142
ENSMUSG00000040495	Chrm4	109	86	91	105	60	83	75	53	92.3602821011359	89.7984137618423	94.8979828399266	103.329150904627	64.369269695194	84.8059061135569	72.4891509898284	53.3404513403689	81.92382596831	0.424013794267485	0.207471234404936	2.04372329245368	0.040980890806291	0.976422353341142
ENSMUSG00000020272	Stk10	427	311	265	273	226	285	344	243	361.815050065918	324.736124185267	276.351268709676	268.65579235203	242.457582518564	291.201002920045	332.483572540013	244.560937277541	292.782666321132	0.271438576984721	0.132901209317717	2.04240863102918	0.041111014313322	0.976422353341142
ENSMUSG00000036862	Dchs1	1823	1305	1210	1420	946	1127	1220	1301	1544.70453459056	1362.63872045586	1261.83032127814	1397.40375509114	1014.88881886089	1151.52115891541	1179.15685610121	1309.35711686453	1277.68766026972	0.219783258793343	0.107707498309215	2.04055671372453	0.041294908424917	0.976422353341142
ENSMUSG00000030516	Tjp1	3563	2865	2694	3138	1924	2794	3242	2850	3019.07968005823	2991.54017939161	2809.39742605233	3088.06548132114	2064.10791489255	2854.79158652142	3133.46436678698	2868.30728905758	2853.59424051023	0.212634862157865	0.104080534874475	2.04298394905743	0.041054027060682	0.976422353341142
ENSMUSG00000012296	Tjap1	936	903	698	777	607	669	819	749	793.112147217094	942.883344499345	727.898813431525	764.635716694239	651.202445083046	683.556038433368	791.581528808926	753.811284036535	763.58516477551	0.207144947006113	0.10140911430277	2.04266597169614	0.041085515546224	0.976422353341142
ENSMUSG00000022175	Lrp10	1691	1513	1226	1282	1063	1156	1208	1169	1432.85538562404	1579.8255816473	1278.51568089835	1261.59972818792	1140.40889476652	1181.1521381599	1167.55859194284	1176.5092003187	1277.3031501932	0.204936654226148	0.100492408581014	2.03932473228497	0.041417628855869	0.976422353341142
ENSMUSG00000042129	Rassf4	734	562	576	685	457	580	606	520	621.949055616823	586.822192257621	600.672946327447	674.099698758757	490.279270845061	592.619584889916	585.712339997813	523.340277301733	584.436920749396	0.197103266203765	0.096364679485543	2.04538911202767	0.040816511516376	0.976422353341142
ENSMUSG00000041380	Htr2c	3367	3563	2999	3148	2578	2771	3647	2980	2853.00064068371	3720.36916550517	3127.46209381253	3097.90635283586	2765.73295457017	2831.29115470682	3524.90578213205	2999.14235838301	3114.97631282866	0.187924094563538	0.092135772195909	2.03964312757865	0.041385883228882	0.976422353341142
ENSMUSG00000061589	Dot1l	3603	3078	2638	2842	2149	2649	3007	2790	3052.97336156324	3213.94787859245	2750.99866738161	2796.77568448524	2305.49267624953	2706.63669029894	2906.33169368552	2807.92187244584	2817.63481558779	0.175514511217116	0.085822047649606	2.04509815395814	0.040845182255652	0.976422353341142
ENSMUSG00000050132	Sarm1	1301	1009	990	1027	790	919	1057	1000	1102.39199095026	1053.56511029882	1032.4066265003	1010.6575045624	847.528717653387	938.995514679022	1021.61376794998	1006.42361019564	1001.69785534873	0.165327690300526	0.081008857384952	2.04085942744376	0.041264801612189	0.976422353341142
ENSMUSG00000048234	Rnf149	1003	861	836	864	911	898	919	1001	849.884063737975	899.028305220305	871.810040155809	850.251298872359	977.340078205362	917.538598674387	888.233730128697	1007.43003380584	907.689518600091	-0.150453048714052	0.073641227007425	-2.04305461530242	0.04104703194061	0.976422353341142
ENSMUSG00000028247	Coq3	813	652	783	825	843	785	779	858	688.889076589206	680.797276426991	816.539786413874	811.871899964926	904.388239217475	802.079955411352	752.920648281018	863.51145754786	790.124792481588	-0.191776279646123	0.093849285599359	-2.04344954169192	0.041007957501123	0.976422353341142
ENSMUSG00000078974	Sec61g	956	806	880	960	1097	911	861	905	810.058987969596	841.599087116801	917.694779111378	944.723665413732	1176.88481426046	930.821451439161	832.17545336323	910.813367227055	920.596450737677	-0.210927275379607	0.103310299147753	-2.04168681263754	0.041182607709615	0.976422353341142
ENSMUSG00000053317	Sec61b	672	577	569	615	770	623	557	585	569.413849284067	602.484706285849	593.373101493607	605.213598155672	826.072294421656	636.555174804168	538.352761351125	588.75781196445	620.027912220074	-0.232666649199216	0.113757540423246	-2.04528551104004	0.040826718306045	0.976422353341142
ENSMUSG00000031760	Mt3	8091	7958	6543	6330	10011	7852	7868	6961	6855.84442642469	8309.48577577606	6823.26924968835	6229.27166882179	10740.0126486431	8022.84306992348	7604.5951998396	7005.71475057185	7698.87959871112	-0.261685938633076	0.127983652385037	-2.04468253371764	0.040886166691083	0.976422353341142
ENSMUSG00000049124	Gm8186	151	123	91	160	189	141	108	137	127.94864768139	128.432615031472	94.8979828399266	157.453944235622	202.763199539861	144.067864602548	104.384377425353	137.880034596803	137.228583244122	-0.39562020727419	0.193214791292535	-2.04756687946942	0.040602457433771	0.976422353341142
ENSMUSG00000065126	Snord104	67	60	50	63	108	74	75	63	56.7719165208817	62.6500561129133	52.1417488131465	61.9974905427761	115.864685451349	75.6100849687134	72.4891509898284	63.4046874423254	70.1162276052417	-0.470276177763624	0.230563366281033	-2.03968299625885	0.041381909571193	0.976422353341142
ENSMUSG00000030735	Gm9755	66	84	42	70	99	88	71	74	55.9245744832566	87.7100785580786	43.799069003043	68.8861006030846	106.20929499707	89.91469563847	68.6230629370375	74.4753471544774	74.4427779218147	-0.473420958624334	0.231907555297038	-2.0414210223464	0.041208996652079	0.976422353341142
ENSMUSG00000110446	Gm18646	41	74	27	57	82	67	46	62	34.7410235426291	77.2684025392597	28.1565443590991	56.0929676339403	87.9713352500984	68.4577796338351	44.4600126070947	62.3982638321297	57.4432911747608	-0.602132193204987	0.295238256755949	-2.03947889349152	0.04140225562681	0.976422353341142
ENSMUSG00000115457	Gm2387	40	58	22	51	85	50	44	53	33.893681505004	60.5617209091495	22.9423694777844	50.1884447251045	91.1897987348581	51.0878952491307	42.5269685806993	53.3404513403689	50.7164163152624	-0.633837376475404	0.309541868072696	-2.04766282642756	0.040593048676548	0.976422353341142
ENSMUSG00000083380	Ndufb4c	14	14	8	8	30	22	12	9	11.8627885267514	14.6183464263464	8.34267981010344	7.8726972117811	32.184634847597	22.4786739096175	11.5982641583725	9.05781249176076	14.7519871727913	-0.962710672945901	0.470501828918892	-2.04613587827702	0.04074300391323	0.976422353341142
ENSMUSG00000084331	Gm8163	3	7	4	9	16	14	7	8	2.5420261128753	7.30917321317321	4.17133990505172	8.85678436325374	17.1651385853851	14.3046106697566	6.76565409238398	8.05138888156512	8.64576447793059	-1.15975814045087	0.568760040430799	-2.0390991947543	0.041440128568028	0.976422353341142
ENSMUSG00000037982	Gm9725	4	4	5	3	9	12	3	6	3.3893681505004	4.17667040752755	5.21417488131465	2.95226145441791	9.65539045427909	12.2610948597914	2.89956603959314	6.03854166117384	5.82338348857474	-1.32876626673149	0.649566205830591	-2.04562099260139	0.040793674433294	0.976422353341142
ENSMUSG00000102674	8030442B05Rik	0	2	2	2	3	7	1	6	0	2.08833520376378	2.08566995252586	1.96817430294527	3.2184634847597	7.15230533487829	0.966522013197712	6.03854166117384	2.93975149415556	-1.98396341323415	0.970389984459971	-2.04450112326565	0.040904066551836	0.976422353341142
ENSMUSG00000081833	Gm13669	0	1	0	1	3	3	0	3	0	1.04416760188189	0	0.984087151472637	3.2184634847597	3.06527371494784	0	3.01927083058692	1.41640784795612	-2.95865910553341	1.45078669578979	-2.03934810962872	0.041415297314767	0.976422353341142
ENSMUSG00000022091	Sorbs3	1488	1401	1019	1118	920	1068	1162	1006	1260.84495198615	1462.87881023652	1062.64884081193	1100.20943534641	986.995468659641	1091.23744252143	1123.09857933574	1012.46215185681	1137.54696009433	0.222297139320172	0.109076020812692	2.03800191521386	0.041549741337062	0.978198646750066
ENSMUSG00000046352	Gjb2	563	403	266	251	264	214	258	243	477.053567182931	420.799543558401	277.394103685939	247.005875019632	283.224786658853	218.656191666279	249.36267940501	244.560937277541	302.257210556823	0.427612068043371	0.20989633512507	2.03725361754683	0.04162463326497	0.979155262013252
ENSMUSG00000067571	Ms4a15	3	3	3	0	0	0	2	0	2.5420261128753	3.13250280564566	3.12850492878879	0	0	0	1.93304402639542	0	1.34200973421315	3.49562072034009	1.72144548076641	2.03063109427305	0.042292431017272	0.97937611296533
ENSMUSG00000115639	4930404K13Rik	1	3	2	2	0	0	2	0	0.8473420376251	3.13250280564566	2.08566995252586	1.96817430294527	0	0	1.93304402639542	0	1.24584164064217	3.37941309649083	1.6614682537084	2.03399197604166	0.041952404474239	0.97937611296533
ENSMUSG00000030149	Klrk1	2	5	7	3	1	0	0	0	1.6946840752502	5.22083800940944	7.29984483384051	2.95226145441791	1.07282116158657	0	0	0	2.28005619181308	3.19986259617743	1.57591678282514	2.03047688244112	0.042308088690359	0.97937611296533
ENSMUSG00000104263	9430062P05Rik	11	3	4	4	2	0	4	1	9.3207624138761	3.13250280564566	4.17133990505172	3.93634860589055	2.14564232317313	0	3.86608805279085	1.00642361019564	3.44738846457796	2.24964146271376	1.10642638277876	2.03325001801191	0.042027270052633	0.97937611296533
ENSMUSG00000031561	Tenm3	4212	3223	2516	3229	2135	2680	3442	3139	3569.00466247692	3365.35218086532	2623.77280027753	3177.61741210515	2290.47317998732	2738.3111853534	3326.76876942652	3159.16371240412	3031.30798786204	0.23518104853528	0.115663920635604	2.0333138220017	0.042020827616893	0.97937611296533
ENSMUSG00000042564	Fam227a	599	496	476	547	383	468	545	470	507.557880537435	517.907130533416	496.389448701154	538.295671855533	410.890504887655	478.182699531863	526.754497192753	473.019096791951	493.62461625397	0.187691731897989	0.092334868917341	2.03272863327517	0.042079946798918	0.97937611296533
ENSMUSG00000038611	Phrf1	2328	1943	1753	1875	1438	1712	1963	1834	1972.61226359123	2028.81765045651	1828.08971338892	1845.16340901119	1542.71683036148	1749.24953333023	1897.28271190711	1845.7809010988	1838.71412664318	0.160488084536425	0.079013173666619	2.03115603498694	0.042239168668577	0.97937611296533
ENSMUSG00000052488	Cherp	2492	1932	1884	1948	1521	1724	1980	1934	2111.57635776175	2017.33180683581	1964.70109527936	1917.0017710687	1631.76098677317	1761.51062819003	1913.71358613147	1946.42326211837	1908.00243676983	0.157176335556592	0.077438527681002	2.02969168272491	0.042387888868063	0.97937611296533
ENSMUSG00000021756	Il6st	5126	4201	3841	4362	3234	3646	4048	4069	4343.47528486626	4386.54809550581	4005.52914382591	4292.58815472364	3469.50363657095	3725.32932156661	3912.48110942434	4095.13766988606	4028.8240520462	0.15421461741945	0.075819164596396	2.0339793802843	0.041953674477943	0.97937611296533
ENSMUSG00000063200	Nol7	1782	1541	1624	1567	1855	1723	1616	1590	1509.96351104793	1609.06227449999	1693.564001451	1542.06456635762	1990.08325474308	1760.48887028504	1561.8995733275	1600.21354021107	1658.4174489904	-0.171859305509365	0.084579616180082	-2.0319234500125	0.042161406144547	0.97937611296533
ENSMUSG00000058267	Mrps14	1210	993	1124	1166	1278	1176	1164	1152	1025.28386552637	1036.85842866871	1172.14651331953	1147.4456186171	1371.06544450763	1201.58729625955	1125.03162336214	1159.39999894538	1154.8523486508	-0.175736963253153	0.086305537417351	-2.03621886279829	0.041728382963303	0.97937611296533
ENSMUSG00000028798	Eif3i	2659	2165	2236	2256	2801	2338	2258	2269	2253.08247804514	2260.62285807429	2331.77900692391	2220.10061372227	3004.97207360397	2388.86998184935	2182.40670580043	2283.57517153391	2365.67611119416	-0.185774650360541	0.09149979424489	-2.03032861323529	0.042323147611325	0.97937611296533
ENSMUSG00000025967	Eef1b2	5064	3929	4538	4630	5579	4592	4341	4399	4290.94007853351	4102.53450779394	4732.38512228117	4556.32351131831	5985.26926049145	4691.91229968016	4195.67205929127	4427.25746125062	4622.78678758005	-0.20237647057952	0.099527311534829	-2.03337624073869	0.042014525862043	0.97937611296533
ENSMUSG00000001289	Pfdn5	3714	2969	3270	3498	4176	3428	3223	3218	3147.02832773962	3100.13360998732	3410.07037237978	3442.33685585129	4480.1011707855	3502.5860982804	3115.10044853623	3238.67117760957	3429.50350764621	-0.205793720243303	0.10138067589912	-2.0299107144253	0.042365615790372	0.97937611296533
ENSMUSG00000078572	Ndufaf8	355	266	279	248	399	286	277	293	300.806423356911	277.748582100582	290.950958377357	244.053613565214	428.05564347304	292.222760825027	267.726597655766	294.882117787323	299.555837142653	-0.290984283031171	0.143106199916215	-2.03334504865293	0.042017674894639	0.97937611296533
ENSMUSG00000049526	Tmem202	68	45	62	52	83	63	52	67	57.6192585585068	46.9875420846849	64.6557685283016	51.1725318765771	89.044156411685	64.3707480139046	50.259144686281	67.4303818831079	61.4424415053811	-0.440886105351694	0.216996234212388	-2.03176846341108	0.042177101240836	0.97937611296533
ENSMUSG00000097467	Gm26737	42	22	35	46	59	55	38	38	35.5883655802542	22.9716872414015	36.4992241692025	45.2680089677413	63.2964485336074	56.1966847740437	36.727836501513	38.2440971874343	41.8490441193998	-0.566109680234238	0.278482850559604	-2.03283498102901	0.042069197697822	0.97937611296533
ENSMUSG00000081071	Gm9836	21	30	9	26	60	39	44	30	17.7941827901271	31.3250280564566	9.38551478636636	25.5862659382886	64.369269695194	39.8485582943219	42.5269685806993	30.1927083058692	32.6285620559154	-0.821615205155408	0.404087802264395	-2.0332591099046	0.042026351972233	0.97937611296533
ENSMUSG00000094344	Gm11942	122	224	83	193	379	246	195	202	103.375728590262	233.893542821543	86.5553030298231	189.928820234219	406.599220241309	251.352444625723	188.471792573554	203.297569259519	207.934302671994	-0.839643915193332	0.4126286997182	-2.03486552381537	0.041864405830855	0.97937611296533
ENSMUSG00000091083	Gm4535	5	8	10	7	16	13	9	15	4.2367101881255	8.3533408150551	10.4283497626293	6.88861006030846	17.1651385853851	13.282852764774	8.69869811877941	15.0963541529346	10.5187568059989	-0.987661968487651	0.486039198268014	-2.03206237687651	0.04214734157712	0.97937611296533
ENSMUSG00000111151	Gm5120	6	12	3	7	12	15	6	14	5.0840522257506	12.5300112225827	3.12850492878879	6.88861006030846	12.8738539390388	15.3263685747392	5.79913207918627	14.089930542739	9.46505794664172	-1.08505736502642	0.534050960393751	-2.03174873840957	0.042179099095795	0.97937611296533
ENSMUSG00000112007	Gm18119	3	2	1	2	8	5	2	5	2.5420261128753	2.08833520376378	1.04283497626293	1.96817430294527	8.58256929269253	5.10878952491307	1.93304402639542	5.0321180509782	3.53723643635331	-1.68888535139251	0.832085314111066	-2.02970215043007	0.04238682419403	0.97937611296533
ENSMUSG00000038412	Higd1a	2535	2171	2304	2304	2537	2532	2391	2281	2148.01206537963	2266.88786368558	2402.69178530979	2267.33679699296	2721.74728694512	2587.09101541598	2310.95413355573	2295.65225485626	2375.04665026763	-0.153442949377123	0.075626089450578	-2.02896844847967	0.04246150407483	0.979918684400283
ENSMUSG00000106375	Gm43361	15	12	15	14	22	27	17	20	12.7101305643765	12.5300112225827	15.6425246439439	13.7772201206169	23.6020655549045	27.5874634345306	16.4308742243611	20.1284722039128	17.8010952461536	-0.742917520264273	0.366187949428339	-2.02878746125877	0.042479942968124	0.979918684400283
ENSMUSG00000054428	Atpif1	4141	3412	3480	3562	4472	3802	3967	3602	3508.84337780554	3562.699857621	3629.06571739499	3505.31843354553	4797.65623461512	3884.7235547439	3834.19282635532	3625.1378439247	3793.45473075076	-0.185157523228087	0.091293083989039	-2.02816593697631	0.04254331513894	0.980589104827464
ENSMUSG00000112096	A430103D13Rik	173	138	145	174	199	168	167	179	146.590172509142	144.0951290597	151.211071558125	171.231164356239	213.491411155727	171.655328037079	161.409176204018	180.14982622502	167.479159888131	-0.281686195103474	0.138911719820819	-2.02780726829111	0.042579922264678	0.980642029207702
ENSMUSG00000106286	Gm43424	0	1	1	0	3	4	0	2	0	1.04416760188189	1.04283497626293	0	3.2184634847597	4.08703161993045	0	2.01284722039128	1.42566811290328	-2.96044804865037	1.4601769121152	-2.02745847033144	0.042615547490563	0.980672272808198
ENSMUSG00000101315	Krtap28-13	6	3	4	2	0	0	1	1	5.0840522257506	3.13250280564566	4.17133990505172	1.96817430294527	0	0	0.966522013197712	1.00642361019564	2.04112685784833	3.05493974974656	1.50729369024924	2.02677140461021	0.042685796146495	0.98092559204413
ENSMUSG00000108696	Gm5738	0	2	1	0	7	1	0	4	0	2.08833520376378	1.04283497626293	0	7.50974813110596	1.02175790498261	0	4.02569444078256	1.96104633211223	-2.80083504272102	1.38198220455169	-2.02667952850348	0.042695197386477	0.98092559204413
ENSMUSG00000084007	Gm9003	7	11	8	11	4	3	14	5	5.9313942633757	11.4858436207008	8.34267981010344	10.824958666199	4.29128464634626	3.06527371494784	13.531308184768	5.0321180509782	7.8131076196774	1.27321799110039	0.630062488665932	2.02078050035362	0.043302492250571	0.981089039279144
ENSMUSG00000031070	Mrgprf	40	34	8	22	11	7	6	9	33.893681505004	35.5016984639842	8.34267981010344	21.649917332398	11.8010327774522	7.15230533487829	5.79913207918627	9.05781249176076	16.6497824743459	1.17754233997523	0.58179641494247	2.02397661747652	0.042972557668813	0.981089039279144
ENSMUSG00000104420	E230020A03Rik	37	30	30	24	13	24	34	18	31.3516553921287	31.3250280564566	31.2850492878879	23.6180916353433	13.9466751006254	24.5221897195827	32.8617484487222	18.1156249835215	25.8782578280335	0.671135179591425	0.331688207877439	2.02339173854325	0.043032775273092	0.981089039279144
ENSMUSG00000074622	Mafb	364	330	292	321	241	273	290	258	308.432501695536	344.575308621023	304.507813068775	315.891975622717	258.549899942362	278.939908060253	280.291383827336	259.657291430475	293.85576028356	0.224967593817623	0.111335122852052	2.0206345316255	0.043317611543797	0.981089039279144
ENSMUSG00000025265	Fgd1	627	519	515	517	377	472	533	491	531.283457590938	541.9229853767	537.060012775409	508.773057311353	404.453577918135	482.269731151794	515.15623303438	494.153992606059	501.884130970596	0.193767866766086	0.09569302869986	2.024890103268	0.042878650064922	0.981089039279144
ENSMUSG00000034282	Evpl	1334	1043	985	1014	858	854	945	936	1130.35427819188	1089.06680876281	1027.19245161899	997.864371593254	920.480556641274	872.581250855152	913.363302471838	942.012499143119	986.614439909789	0.17855386396449	0.088273810461595	2.02272750015897	0.043101249997471	0.981089039279144
ENSMUSG00000020422	Tns3	3538	2955	3319	3412	2391	2734	3148	3114	2997.8961291176	3085.51526356098	3461.16928621666	3357.70536082464	2565.11539735348	2793.48611222247	3042.6112975464	3134.00312214922	3054.68774612393	0.171513150754976	0.084934616174859	2.01935510489473	0.043450324253512	0.981089039279144
ENSMUSG00000040848	Sft2d2	1821	1336	1352	1419	1149	1183	1299	1296	1543.00985051531	1395.0079161142	1409.91288790748	1396.41966793967	1232.67151466296	1208.73960159443	1255.51209514383	1304.32499881355	1343.19981658643	0.165448127451597	0.08182942123226	2.02186603498023	0.043190193491597	0.981089039279144
ENSMUSG00000040325	Dcaf1	1538	1259	1223	1396	1018	1170	1343	1254	1303.2120538674	1314.6070107693	1275.38717596956	1373.7856634558	1092.13194249512	1195.45674882966	1298.03906372453	1262.05520718533	1264.33435828709	0.149776318534592	0.07414148255854	2.02014194167662	0.043368666439816	0.981089039279144
ENSMUSG00000011832	Evi5l	5186	4428	4142	4339	3533	3981	4502	4186	4394.31580712377	4623.574141133	4319.42247168105	4269.95415023977	3790.27716388534	4067.61821973578	4351.2821034161	4212.88923227895	4253.66666118672	0.126129918913112	0.062402734806038	2.02122421886079	0.043256559711763	0.981089039279144
ENSMUSG00000042670	Immp1l	555	401	484	478	574	493	465	490	470.274830881931	418.711208354637	504.732128511258	470.393658403921	615.799346750689	503.726647156428	449.432736136936	493.147568995864	490.777265648958	-0.215424310504799	0.106762477547169	-2.01779047708612	0.043613087091143	0.981089039279144
ENSMUSG00000029279	Brdt	374	262	354	368	358	357	315	402	316.905922071787	273.571911693055	369.163581597077	362.144071741931	384.069975847991	364.767572078793	304.454434157279	404.582291298647	347.45747006082	-0.241640814738885	0.119703954932609	-2.01865355973347	0.04352324000891	0.981089039279144
ENSMUSG00000035048	Anapc13	935	826	687	723	1084	861	844	753	792.264805179469	862.482439154439	716.427628692633	711.495010514717	1162.93813915984	879.73355619003	815.744579138869	757.836978477317	837.365392063414	-0.259193754407276	0.128336400359467	-2.01964332552012	0.043420397693969	0.981089039279144
ENSMUSG00000021496	Pcbd2	402	399	307	320	503	356	337	364	340.63149912529	416.622873150873	320.150337712719	314.907888471244	539.629044278043	363.74581417381	325.717918447629	366.338194111213	373.467946183853	-0.300237455605237	0.148736202212723	-2.01859030376368	0.04352981965464	0.981089039279144
ENSMUSG00000026708	Cenpl	63	48	59	56	68	73	62	74	53.3825483703813	50.1200448903306	61.5272635995128	55.1088804824677	72.9518389878865	74.5883270637308	59.9243648182581	74.4753471544774	62.7598269208807	-0.402714662312748	0.199436299161775	-2.01926461735074	0.043459723360623	0.981089039279144
ENSMUSG00000050549	Fam241a	76	69	45	42	75	62	65	96	64.3979948595076	72.0475645298502	46.9275739318318	41.3316603618508	80.4615871189925	63.348990108922	62.8239308578513	96.6166665787815	65.9944960434485	-0.477862761597171	0.2366444907822	-2.01932764214224	0.043453176678449	0.981089039279144
ENSMUSG00000083679	Gm12892	481	691	319	533	859	747	556	573	407.571520097673	721.519812900384	332.664357427875	524.518451734916	921.55337780286	763.253155022012	537.386239337928	576.680728642102	598.143455370719	-0.578829254736783	0.286600379685538	-2.01963882731727	0.043420864618125	0.981089039279144
ENSMUSG00000075591	Gm10874	32	55	25	50	78	51	50	54	27.1149452040032	57.4292181035038	26.0708744065732	49.2043575736319	83.6800506037522	52.1096531541133	48.3261006598856	54.3468749505646	49.7852593320035	-0.608455130784321	0.301056398320478	-2.02106693024545	0.043272837090978	0.981089039279144
ENSMUSG00000082284	H3f3a-ps1	27	22	19	27	37	31	20	31	22.8782350158777	22.9716872414015	19.8138645489957	26.5703530897612	39.6943829787029	31.674495054461	19.3304402639542	31.1991319160649	26.7665737636524	-0.613096692832931	0.302858293266879	-2.02436818295304	0.042932282929315	0.981089039279144
ENSMUSG00000113600	Gm7868	20	18	6	19	37	21	25	28	16.946840752502	18.795016833874	6.25700985757758	18.6976558779801	39.6943829787029	21.4569160046349	24.1630503299428	28.1798610854779	21.7738417150865	-0.804936004400779	0.398588228116647	-2.01946757987347	0.043438643665148	0.981089039279144
ENSMUSG00000081967	Gm14017	16	11	8	22	26	20	10	21	13.5574726020016	11.4858436207008	8.34267981010344	21.649917332398	27.8933502012507	20.4351580996523	9.66522013197712	21.1348958141085	16.770567201524	-0.833933618187258	0.411683107442189	-2.02566878045722	0.042798737996484	0.981089039279144
ENSMUSG00000053081	1700069B07Rik	16	21	7	10	18	19	13	32	13.5574726020016	21.9275196395196	7.29984483384051	9.84087151472637	19.3107809085582	19.4134001946697	12.5647861715703	32.2055555262605	17.0150289238933	-0.861838010992913	0.426079426894769	-2.0227167907963	0.043102354753567	0.981089039279144
ENSMUSG00000114218	Gm47423	6	4	4	4	9	8	3	11	5.0840522257506	4.17667040752755	4.17133990505172	3.93634860589055	9.65539045427909	8.17406323986091	2.89956603959314	11.070659712152	6.1460113237632	-1.2443903250443	0.616144107884028	-2.0196416862896	0.043420567849505	0.981089039279144
ENSMUSG00000082253	Gm14639	3	6	2	7	9	13	5	9	2.5420261128753	6.26500561129133	2.08566995252586	6.88861006030846	9.65539045427909	13.282852764774	4.83261006598856	9.05781249176076	6.82624718922542	-1.24641143010393	0.617103140395748	-2.01977813515032	0.04340640610209	0.981089039279144
ENSMUSG00000101191	Gm28809	5	4	3	4	7	9	1	9	4.2367101881255	4.17667040752755	3.12850492878879	3.93634860589055	7.50974813110596	9.19582114484352	0.966522013197712	9.05781249176076	5.27601723890504	-1.38297845712543	0.684326628304067	-2.02093327940898	0.043286672326532	0.981089039279144
ENSMUSG00000107618	Gm6261	0	1	1	1	9	3	3	3	0	1.04416760188189	1.04283497626293	0.984087151472637	9.65539045427909	3.06527371494784	2.89956603959314	3.01927083058692	2.71382384612806	-2.14842754943346	1.06476239059304	-2.01775303900136	0.043616987945945	0.981089039279144
ENSMUSG00000115745	Gm46448	1	0	0	0	3	4	1	2	0.8473420376251	0	0	0	3.2184634847597	4.08703161993045	0.966522013197712	2.01284722039128	1.39152579698803	-2.96046049122616	1.46729128704645	-2.01763652340999	0.043629130153731	0.981089039279144
ENSMUSG00000101567	Txn-ps1	3	2	7	1	7	11	1	6	2.5420261128753	2.08833520376378	7.29984483384051	0.984087151472637	7.50974813110596	11.2393369548087	0.966522013197712	6.03854166117384	4.83355525777981	-1.58878894567158	0.787770423227019	-2.01681720819535	0.043714592467694	0.982238024621986
ENSMUSG00000097138	NA	1	3	3	2	0	0	1	0	0.8473420376251	3.13250280564566	3.12850492878879	1.96817430294527	0	0	0.966522013197712	0	1.25538076102532	3.3874593334741	1.68144111571798	2.01461668910579	0.043944827442764	0.982243587796596
ENSMUSG00000086746	Gm15222	9	11	4	9	4	2	5	1	7.6260783386259	11.4858436207008	4.17133990505172	8.85678436325374	4.29128464634626	2.04351580996523	4.83261006598856	1.00642361019564	5.53923504501598	1.60822416949399	0.797637949694733	2.01623326737334	0.04377558926253	0.982243587796596
ENSMUSG00000029096	Htra3	350	249	188	209	204	160	188	145	296.569713168785	259.99773286859	196.052975537431	205.674214657781	218.855516963659	163.481264797218	181.70613848117	145.931423478368	208.533622494125	0.375593853894513	0.186585856706066	2.01298137235662	0.044116589050634	0.982243587796596
ENSMUSG00000021943	Gdf10	220	179	163	160	129	122	193	169	186.415248277522	186.906000736858	169.982101130858	157.453944235622	138.393929844667	124.654464407879	186.538748547158	170.085590123063	165.053753412953	0.297480306516328	0.147906691072802	2.01127010792165	0.044296934077882	0.982243587796596
ENSMUSG00000021823	Vcl	934	797	657	816	459	651	850	795	791.417463141844	832.201578699865	685.142579404745	803.015115601672	492.424913168234	665.164396143681	821.543711218055	800.106770105534	736.377065935454	0.269031510999857	0.133672375605382	2.0126186115976	0.044154767465923	0.982243587796596
ENSMUSG00000032855	Pkd1	8391	6565	5158	6135	4381	5568	6175	5831	7110.04703771221	6854.96030635459	5378.94280756419	6037.37467428463	4700.02950891075	5689.14801494319	5968.27343149587	5868.45607105078	5950.90398153953	0.210386446591943	0.104629494121018	2.01077572207893	0.044349151613323	0.982243587796596
ENSMUSG00000027678	Ncoa3	1904	1687	1499	1632	1147	1536	1781	1544	1613.33923963819	1761.51074437474	1563.20962941813	1606.03023120334	1230.52587233979	1569.42014205329	1721.37570550512	1553.91805414207	1577.41620233434	0.187386015151142	0.093092871732903	2.01289327166509	0.044125858562301	0.982243587796596
ENSMUSG00000031596	Slc7a2	1205	931	918	939	705	825	898	905	1021.04715533825	972.120037352037	957.322508209369	924.057835232806	756.338918918529	842.950271610656	867.936767851545	910.813367227055	906.57335771753	0.180746272376908	0.089809883925744	2.01254321324311	0.044162706194508	0.982243587796596
ENSMUSG00000009569	Mrtfb	5198	3807	4073	4753	3110	3707	4407	4269	4404.48391157527	3975.14606036435	4247.46685831891	4677.36623094944	3336.47381253422	3787.65655377055	4259.46251216232	4296.42239192519	4123.05979145003	0.179954043540128	0.089362673225076	2.01374955611368	0.04403583424703	0.982243587796596
ENSMUSG00000013275	Slc41a1	2940	2363	1948	2169	1799	2083	2247	1924	2491.18559061779	2467.3680432469	2031.44253376019	2134.48503154415	1930.00526969423	2128.32171607878	2171.77496365526	1936.35902601641	2161.36777182671	0.177334582095642	0.088112101728419	2.01260188574579	0.044156528434836	0.982243587796596
ENSMUSG00000005686	Ampd3	1440	1239	1106	1251	903	1081	1281	1188	1220.17253418014	1293.72365873166	1153.3754837468	1231.09302649227	968.757508912669	1104.52029528621	1238.11469890627	1195.63124891242	1175.67355689605	0.171144082932687	0.085093828546427	2.01123966163199	0.044300148345975	0.982243587796596
ENSMUSG00000035215	Lsm7	1176	961	955	940	1245	1027	1002	986	996.474236247118	1003.44506540849	995.907402331098	925.041922384279	1335.66234617527	1049.34536841714	968.455057224107	992.333679652902	1033.33313473005	-0.202692182115233	0.100650863607648	-2.01381463457042	0.044028998655211	0.982243587796596
ENSMUSG00000108414	Snhg1	525	390	471	513	545	489	501	529	444.854569753178	407.225364733936	491.17527381984	504.836708705463	584.687533064678	499.639615536498	484.227528612054	532.398089793494	493.630585502393	-0.207943390992029	0.103404352443726	-2.0109732915275	0.044328277899156	0.982243587796596
ENSMUSG00000020163	Uqcr11	2033	2123	1551	1695	2497	1866	1771	1854	1722.64636249183	2216.76781879525	1617.4370481838	1668.02772174612	2678.83444048166	1906.60025069756	1711.71048537315	1865.90937330272	1923.49168763401	-0.266782662620011	0.132360218282616	-2.01558040687403	0.04384387029301	0.982243587796596
ENSMUSG00000098178	NA	616	378	440	392	644	411	392	489	521.962695177062	394.695353511354	458.847389555689	385.762163377274	690.896828061748	419.942498947854	378.876629173503	492.141145385668	467.890587898769	-0.318517040463086	0.158400171475919	-2.01083772508106	0.044342599945719	0.982243587796596
ENSMUSG00000056366	Fabp3-ps1	47	44	26	33	80	57	58	40	39.8250757683797	45.9433744828031	27.1137093828362	32.474875998597	85.8256929269253	58.240200584009	56.0582767654673	40.2569444078256	48.2172687896054	-0.60516634139464	0.300460330632284	-2.01413058463038	0.043995825200906	0.982243587796596
ENSMUSG00000080966	Gm6263	12	25	8	23	37	23	13	23	10.1681044515012	26.1041900470472	8.34267981010344	22.6340044838707	39.6943829787029	23.5004318146001	12.5647861715703	23.1477430344997	20.7695403489869	-0.854628906547187	0.425047851378261	-2.01066516105414	0.044360836285715	0.982243587796596
ENSMUSG00000078370	Gm6316	13	32	10	24	62	28	23	19	11.0154464891263	33.4133632602204	10.4283497626293	23.6180916353433	66.5149120183671	28.6092213395132	22.2300063035474	19.1220485937172	26.868929925308	-0.920976621500396	0.458060781930823	-2.01059915589867	0.044367813297135	0.982243587796596
ENSMUSG00000102550	Gm8276	4	13	8	14	20	20	12	16	3.3893681505004	13.5741788244645	8.34267981010344	13.7772201206169	21.4564232317313	20.4351580996523	11.5982641583725	16.1027777631302	13.5845087698215	-0.943545366824791	0.468135433552943	-2.01553930593054	0.043848171944247	0.982243587796596
ENSMUSG00000061062	Hdac1-ps	32	26	21	40	49	39	30	37	27.1149452040032	27.1483576489291	21.8995345015215	39.3634860589055	52.5682369177417	39.8485582943219	28.9956603959314	37.2376735772387	34.2720565748241	-0.577234226180178	0.287190283526287	-2.00993647519186	0.044437912655688	0.98303404149553
ENSMUSG00000054422	Fabp1	45	1	1	0	0	0	1	0	38.1303916931295	1.04416760188189	1.04283497626293	0	0	0	0.966522013197712	0	5.147989535559	5.44124728177272	2.71160889060735	2.00664900481056	0.044787049453231	0.984991116584792
ENSMUSG00000059657	Stfa2l1	9	2	1	1	0	0	0	0	7.6260783386259	2.08833520376378	1.04283497626293	0.984087151472637	0	0	0	0	1.46766695876566	3.64735287619823	1.820973250686	2.00296894796461	0.045180621566992	0.984991116584792
ENSMUSG00000056632	Dsg3	1	2	4	0	0	0	4	0	0.8473420376251	2.08833520376378	4.17133990505172	0	0	0	3.86608805279085	0	1.37163814990393	3.5206086390452	1.76634859656818	1.9931561900552	0.046244346678978	0.984991116584792
ENSMUSG00000033831	Fgb	413	4	12	7	8	10	2	5	349.952261539166	4.17667040752755	12.5140197151552	6.88861006030846	8.58256929269253	10.2175790498261	1.93304402639542	5.0321180509782	49.9121090177562	3.2419430453035	1.61862164606468	2.0029035526527	0.045187641701715	0.984991116584792
ENSMUSG00000105448	Gm25820	7	2	5	0	0	1	3	0	5.9313942633757	2.08833520376378	5.21417488131465	0	0	1.02175790498261	2.89956603959314	0	2.14440353662873	3.13150618227298	1.57052502965845	1.99392312961354	0.046160455830737	0.984991116584792
ENSMUSG00000107894	Gm10388	3	2	4	2	1	0	4	0	2.5420261128753	2.08833520376378	4.17133990505172	1.96817430294527	1.07282116158657	0	3.86608805279085	0	1.96359809237669	2.98102733813276	1.48786679569787	2.00355794399897	0.045117434735012	0.984991116584792
ENSMUSG00000079168	Cd209g	3	3	1	5	1	0	3	0	2.5420261128753	3.13250280564566	1.04283497626293	4.92043575736319	1.07282116158657	0	2.89956603959314	0	1.95127335666585	2.97482859361469	1.50585639439892	1.97550616690918	0.048210735467437	0.984991116584792
ENSMUSG00000029368	Alb	3256	120	83	40	73	106	35	57	2758.94567450733	125.300112225827	86.5553030298231	39.3634860589055	78.3159447958193	108.306337928157	33.8282704619199	57.3661457811515	410.997659348616	2.90424856287477	1.46230321765887	1.98607821401395	0.047024639915821	0.984991116584792
ENSMUSG00000026579	F5	72	930	47	48	24	37	33	61	61.0086267090072	971.075869750156	49.0132438843577	47.2361832706866	25.7477078780776	37.8050424843567	31.8952264355245	61.3918402219341	160.646717579262	2.47761974779202	1.24336470505303	1.99267337871421	0.046297224288368	0.984991116584792
ENSMUSG00000077557	Gm23706	9	8	4	5	0	2	5	3	7.6260783386259	8.3533408150551	4.17133990505172	4.92043575736319	0	2.04351580996523	4.83261006598856	3.01927083058692	4.37082394032958	1.8092159428478	0.908197201090794	1.99209592440368	0.046360534061558	0.984991116584792
ENSMUSG00000090824	Olfr1344	9	8	9	5	2	2	3	2	7.6260783386259	8.3533408150551	9.38551478636636	4.92043575736319	2.14564232317313	2.04351580996523	2.89956603959314	2.01284722039128	4.92336763631667	1.68056250983824	0.837630345436677	2.00632954500009	0.044821099810743	0.984991116584792
ENSMUSG00000026574	Dpt	16	14	11	17	7	8	13	5	13.5574726020016	14.6183464263464	11.4711847388922	16.7294815750348	7.50974813110596	8.17406323986091	12.5647861715703	5.0321180509782	11.2071501169738	1.00028212489821	0.499838534410515	2.00121050306353	0.04536970956771	0.984991116584792
ENSMUSG00000037206	Islr	699	425	235	242	215	133	175	164	592.292084299945	443.771230799802	245.066219421788	238.149090656378	230.656549741112	135.893801362688	169.1413523096	165.053472072085	277.502975082925	0.930920618896653	0.464068248223176	2.00599938147236	0.044856313989412	0.984991116584792
ENSMUSG00000108034	4930557K07Rik	24	34	23	32	12	11	49	30	20.3362089030024	35.5016984639842	23.9852044540474	31.4907888471244	12.8738539390388	11.2393369548087	47.3595786466879	30.1927083058692	26.6224223143204	0.803337888066602	0.40604642435948	1.97843852296897	0.04787925749545	0.984991116584792
ENSMUSG00000030074	Gxylt2	63	98	29	33	31	29	65	39	53.3825483703813	102.328424984425	30.242214311625	32.474875998597	33.2574560091835	29.6309792444958	62.8239308578513	39.25052079763	47.9238688217736	0.722731445684716	0.364941618270965	1.98040291789383	0.047658272352472	0.984991116584792
ENSMUSG00000054889	Dsp	126	100	62	64	50	49	43	49	106.765096740763	104.416760188189	64.6557685283016	62.9815776942488	53.6410580793283	50.0661373441481	41.5604465675016	49.3147568995864	66.6752002552583	0.578963761236618	0.290924805745067	1.99008042560645	0.046582076701112	0.984991116584792
ENSMUSG00000098172	Gm26973	71	36	63	69	35	51	58	29	60.1612846713821	37.590033667748	65.6986035045646	67.902013451612	37.5487406555298	52.1096531541133	56.0582767654673	29.1862846956736	50.7818613207613	0.538822930205605	0.272122192365364	1.98007713197517	0.0476948623114	0.984991116584792
ENSMUSG00000020264	Slc36a2	89	46	63	65	39	52	50	32	75.4134413486339	48.0317096865668	65.6986035045646	63.9656648457214	41.8400253018761	53.1314110590959	48.3261006598856	32.2055555262605	53.5765639915756	0.512004132528362	0.257414716567012	1.98902432369314	0.046698518250782	0.984991116584792
ENSMUSG00000030111	A2m	616	500	336	346	251	351	362	354	521.962695177062	522.083800940944	350.392552024344	340.494154409532	269.278111558228	358.637024648897	349.880968777572	356.273958009257	383.62540819323	0.346071749838734	0.172511832524392	2.00607543711415	0.044848200071844	0.984991116584792
ENSMUSG00000041445	Mmrn2	251	208	163	160	117	147	150	152	212.6828514439	217.186861191433	169.982101130858	157.453944235622	125.520075905628	150.198412032444	144.978301979657	152.976388749737	166.37236708366	0.336583862713265	0.16972382618684	1.98312676702643	0.04735327140345	0.984991116584792
ENSMUSG00000051747	Ttn	180	127	156	188	140	120	173	111	152.521566772518	132.609285439	162.682256297017	185.008384476856	150.194962622119	122.610948597914	167.208308283204	111.713020731716	148.068591652543	0.321965323823329	0.161117953414973	1.99832059059291	0.045681914580253	0.984991116584792
ENSMUSG00000034810	Scn7a	1025	508	688	933	627	614	709	484	868.525588565728	530.437141755999	717.470463668895	918.153312323971	672.658868314777	627.359353659325	685.264107357178	487.10902733469	688.37223287257	0.321648368412264	0.160817400068451	2.00008437069221	0.045491154154551	0.984991116584792
ENSMUSG00000107068	Gm42742	213	147	210	166	129	136	151	137	180.483854014146	153.492637476637	218.995345015215	163.358467144458	138.393929844667	138.959075077635	145.944823992854	137.880034596803	159.688520895302	0.31687179376559	0.159792539137646	1.98301995497196	0.047365200606849	0.984991116584792
ENSMUSG00000028776	Tinagl1	340	293	251	258	232	193	212	194	288.096292792534	305.941107351393	261.751579041995	253.89448507994	248.894509488083	197.199275661644	204.902666797915	195.246180377954	244.490762073932	0.299539816055198	0.150063586813683	1.9960859420687	0.045924568944275	0.984991116584792
ENSMUSG00000041577	Prelp	1415	1213	781	945	768	742	843	877	1198.98898323952	1266.57530108273	814.454116461348	929.962358141642	823.926652098483	758.144365497099	814.778057125671	882.633506141577	936.182917473508	0.290922998659169	0.147100397019309	1.97771729073567	0.047960608549619	0.984991116584792
ENSMUSG00000007682	Dio2	366	339	420	393	253	333	400	324	310.127185770787	353.97281703796	437.99069003043	386.746250528746	271.423753881401	340.24538235921	386.608805279085	326.081249703388	351.649516823876	0.260711391958791	0.130427186762383	1.99890374415393	0.045618769563043	0.984991116584792
ENSMUSG00000044452	Zfp507	897	710	629	755	454	672	874	710	760.065807749715	741.35899733614	655.943200069383	742.985799361841	487.060807360301	686.621312148316	844.7402395348	714.560763238905	704.167115849925	0.250609414124655	0.126855766954702	1.97554608781911	0.048206209835814	0.984991116584792
ENSMUSG00000020614	Fam20a	672	577	700	738	443	581	753	625	569.413849284067	602.484706285849	729.984483384051	726.256317786806	475.259774582849	593.641342794898	727.791075937877	629.014756372275	631.730788303584	0.244780056604009	0.123106572716167	1.9883589576356	0.046772004538908	0.984991116584792
ENSMUSG00000023348	Trip6	440	351	319	313	251	301	308	276	372.830496555044	366.502828260543	332.664357427875	308.019278410935	269.278111558228	307.549129399767	297.688780064895	277.772916413997	316.53823726141	0.236505467019678	0.11850239829309	1.99578633366333	0.045957184992101	0.984991116584792
ENSMUSG00000036273	Lrrk2	690	711	565	652	459	557	716	605	584.666005961319	742.403164938022	589.201761588555	641.62482276016	492.424913168234	569.119153075316	692.029761449562	608.886284168363	615.044483388691	0.222006882036574	0.110819878161167	2.00331281463518	0.045143722880142	0.984991116584792
ENSMUSG00000060924	Csmd1	1998	1641	1456	1574	1078	1554	1818	1515	1692.98939117495	1713.47903468818	1518.36772543883	1548.95317641793	1156.50121219032	1587.81178434298	1757.13701999344	1524.7317694464	1562.49638921163	0.20994706775406	0.10577665770178	1.98481472487032	0.047165088621226	0.984991116584792
ENSMUSG00000026211	Obsl1	1380	1257	982	1043	824	938	1036	1022	1169.33201192264	1312.51867556553	1024.0639466902	1026.40289898596	884.00463714733	958.408914873691	1001.31680567283	1028.56492961994	1050.57660255977	0.209454075129862	0.10566724256671	1.98220441872163	0.04745636633691	0.984991116584792
ENSMUSG00000026104	Stat1	814	582	616	669	499	533	543	545	689.736418626832	607.705544295259	642.386345377965	658.354304335194	535.337759631696	544.596963355733	524.821453166358	548.500867556624	593.929957043208	0.202990834263885	0.102139189801844	1.9873942084101	0.046878728991638	0.984991116584792
ENSMUSG00000025224	Gbf1	4668	3896	3376	3749	2574	3292	3814	3766	3955.39263163397	4068.07697693183	3520.61087986365	3689.34273087092	2761.44166992382	3363.62702320276	3686.31495833607	3790.19131599678	3604.37477334498	0.195074606384063	0.098726505178882	1.97590916472338	0.048165066025177	0.984991116584792
ENSMUSG00000046182	Gsg1l	1387	911	1051	1086	939	907	1020	837	1175.26340618601	951.2366853144	1096.01956005234	1068.71864649928	1007.37907072979	926.73441981923	985.852453461666	842.376561733751	1006.69760047456	0.190494959768323	0.095711522870846	1.99030329948233	0.046557534776566	0.984991116584792
ENSMUSG00000031024	Denn2b	1041	903	756	870	632	769	947	836	882.083061167729	942.883344499345	788.383242054775	856.155821781194	678.02297412271	785.73182893163	915.296346498233	841.370138123555	836.240844647396	0.190267059627036	0.096082589824161	1.98024491195794	0.04767601550818	0.984991116584792
ENSMUSG00000053617	Sh3pxd2a	1759	1390	1164	1258	1014	1212	1307	1172	1490.47464418255	1451.39296661582	1213.85991237005	1237.98163655258	1087.84065784878	1238.37058083893	1263.24427124941	1179.52847114929	1270.33664260093	0.188411366704432	0.094479877286794	1.99419571780888	0.046130669953044	0.984991116584792
ENSMUSG00000021215	Net1	612	481	553	509	427	453	588	482	518.573327026561	502.244616505188	576.6877418734	500.900360099572	458.094635997464	462.856330957124	568.314943760255	485.096180114299	509.096017041733	0.185957088314753	0.093501403070275	1.98881601995843	0.046721513880953	0.984991116584792
ENSMUSG00000070808	Bicra	1028	835	718	792	601	711	833	774	871.067614678603	871.879947571376	748.755512956783	779.397023966329	644.765518113526	726.469870442638	805.112836993694	778.971874291426	778.302524876797	0.185701655223984	0.09396020441535	1.97638624116964	0.048111048661431	0.984991116584792
ENSMUSG00000009418	Nav1	7779	5704	5769	6446	4463	5788	6846	6038	6591.47371068565	5955.93200113429	6016.11497806084	6343.42577839262	4788.00084416084	5913.93475403937	6616.80970235153	6076.78575836128	6037.8096908983	0.172820082264314	0.086957525317755	1.98740800905737	0.046877200865011	0.984991116584792
ENSMUSG00000031833	Mast3	5490	4249	4181	4301	3250	3731	3846	4074	4651.9077865618	4436.66814039614	4360.09303575531	4232.55883848381	3486.66877515634	3812.17874349013	3717.2436627584	4100.16978793704	4099.68609631737	0.17159502252528	0.086710184740795	1.97894887478597	0.047821762688653	0.984991116584792
ENSMUSG00000007817	Zmiz1	5674	4238	4170	4640	3261	4093	4667	4409	4807.81872148482	4425.18229677544	4348.62185101642	4566.16438283304	3498.46980793379	4182.05510509384	4510.75823559372	4437.32169735258	4347.04901226046	0.165921142336031	0.083300831200465	1.99183057293556	0.046389650563954	0.984991116584792
ENSMUSG00000028063	Lmna	1847	1501	1501	1437	1245	1302	1378	1327	1565.04074349356	1567.29557042471	1565.29529937066	1414.13323666618	1335.66234617527	1330.32879228736	1331.86733418645	1335.52413072961	1430.64343166673	0.158467789159323	0.079697689485832	1.98836114549461	0.046771762741669	0.984991116584792
ENSMUSG00000034616	Ssh3	2575	2183	1967	2117	1652	1885	2317	2120	2181.90574688463	2279.41787490816	2051.25639830918	2083.31249966757	1772.30055894101	1926.01365089223	2239.4315045791	2133.61805361476	2083.40703597458	0.156505635291436	0.079017646997607	1.98064155588152	0.047631485205105	0.984991116584792
ENSMUSG00000000632	Sez6	4995	4258	3748	3826	3211	3846	4358	3685	4232.47347793737	4446.06564881308	3908.54549103346	3765.11744153431	3444.82874985446	3929.68090256313	4212.10293351563	3708.67100357094	3955.9357061028	0.154752767290645	0.077324339477691	2.00134612640686	0.045355102102522	0.984991116584792
ENSMUSG00000109336	Samd4b	2986	2736	2411	2555	2059	2432	2716	2356	2530.16332434855	2856.84255874884	2514.27512776992	2514.34267201259	2208.93877170674	2484.91522491772	2625.07378784499	2371.13402562093	2513.21068662128	0.14698526840848	0.07345030304965	2.00115264751355	0.045375942171477	0.984991116584792
ENSMUSG00000020747	Tmem94	3659	2837	2581	2818	2283	2517	2833	2693	3100.42451567024	2962.30348653892	2691.55707373462	2773.15759284989	2449.25071190213	2571.76464684124	2738.15686338912	2710.29878225686	2749.61420914788	0.146919365931378	0.07347949915343	1.9994606335653	0.045558537148748	0.984991116584792
ENSMUSG00000033697	Arhgap39	2590	1998	1934	2041	1586	1886	2112	1968	2194.61587744901	2086.24686856001	2016.84284409251	2008.52187615565	1701.49436227629	1927.03540879721	2041.29449187357	1980.64166486502	1994.58667425866	0.146436078669163	0.07392592501902	1.9808487838534	0.047608234105185	0.984991116584792
ENSMUSG00000028064	Sema4a	3926	2954	2854	2985	2601	2683	2862	2638	3326.66483971614	3084.4710959591	2976.2510222544	2937.50014714582	2790.40784128666	2741.37645906835	2766.18600177185	2654.9454836961	2909.7253613623	0.145665507671646	0.073669239817369	1.97729076657722	0.048008772777556	0.984991116584792
ENSMUSG00000039804	Ncoa5	2104	1828	1788	1980	1470	1656	1965	1820	1782.80764716321	1908.73837624009	1864.58893755812	1948.49255991582	1577.04710753225	1692.03109065121	1899.2157559335	1831.69097055607	1813.07655569378	0.145038471507919	0.072602085484674	1.99771770383285	0.045747273754802	0.984991116584792
ENSMUSG00000015697	Setdb1	2182	1650	1641	1820	1372	1638	1871	1667	1848.90032609797	1722.87654310511	1711.29219604747	1791.0386156802	1471.91063369677	1673.63944836152	1808.36268669292	1677.70815819613	1713.21607598476	0.144019490572028	0.07264027278082	1.98263972667866	0.04740768655631	0.984991116584792
ENSMUSG00000055675	Kbtbd11	3740	2929	3290	3376	2647	2903	3353	3066	3169.05922071787	3058.36690591205	3430.92707190504	3322.27822337162	2839.75761471964	2966.16319816453	3240.74831025193	3085.69478885983	3139.12441673781	0.130223786633244	0.065355980665388	1.99253052754222	0.046312879137396	0.984991116584792
ENSMUSG00000015709	Arnt2	12071	9269	8972	9934	7704	8966	9785	9171	10228.2657361726	9678.38950184322	9356.315407031	9775.92176272918	8265.0142288629	9161.08137607411	9457.41789913961	9229.91092910422	9394.0396051196	0.126462815310575	0.063492649786462	1.9917709488562	0.046396195116432	0.984991116584792
[truncated: 27,236 more rows]
