# Supplementary material for: Reassessment of the involvement of Snord115 in the serotonin 2c receptor pathway in a genetically relevant mouse model
Source: eLife. 2020 Oct 5;9:e60862. doi: 10.7554/eLife.60862 (PMC7673782; doi:10.7554/eLife.60862)
Supplement: Supplementary file 4. [file elife-60862-supp4.xlsx]

## Sheet: Feuil1
List of oligonucleotides used in the study.
Northern blotting
Snord115		GGGCCTCAGCGTAATCCTATTGA
Snord116		ACCTCAGTTCCGATGAGAGTGGCGG
sgRNA (oligo cloning in pX458)
sgRNA1-R		AAACTAGTATGTGATATACCTCAAC
sgRNA1-F		CACCGTTGAGGTATATCACATACTA
sgRNA2-R		AAACGTACTCTTGTTCTAGGATGCC
sgRNA2-F		CACCGGCATCCTAGAACAAGAGTAC
Mouse genotyping (PCR)
P1		CTTGTGCTTAAAATGACTTGGATCC
P2		AATATTCTAGGAATATCAATGTTCAG
P3		GTCATAAGACATGTTATTTGGAACAC
spliced Ht2rc (RT-PCR)
Ht2rc	forward	TCATGCACCTCTGCGCCATATCGC
	reverse	CGAACACTTTGCTTTCGTCCCTCAG
ht2rc RNA editing (RT-PCR)
Primer F	forward	CTTTCCCTACACGACGCTCTTCCGATCTCTGGTGGGACTACTTGTCAT
Primer R	reverse	GGAGTTCAGACGTGTGCTCTTCCGATCTTATTGATATTGCCCAAACGATGG
5-HT2C RNA editing (PCR)
P5		AATGATACGGCGACCACCGAGATCTACACTCTTTCCCTACACGAC
P7		CAAGCAGAAGACGGCATACGAGAT-index-GTGACTGGAGTTCAGACGTGT
RT-qPCR
Snord115	forward	GGGTCAATGATGACAACCCAATG
	reverse	GGGCCTCAGCGTAATCCTATTG
Ht2rc RNA2	forward	ACTTGTCATGCCCCTGTCTC
	reverse	CCTTAGTCCGCGAATTGAAC
Ht2rc RNA1	forward	CCATTGCTGATATGCTGGTG
	reverse	ACTGAAACTCCCGGTCCAG
Snord116	forward	TGGATCTATGATGATTCCCAG
	reverse	TGGACCTCAGTTCCG ATGAG
Ht2rc-UTR	forward	GTCCGTTTCTCGTCTAGCTGCCGC
	reverse	GAAGTTAACAGTATTGTTTCATCCC
Gapdh	forward	TGCACCACCAACTGCTTAG
	reverse	GGATGCAGGGATGATGTTC
Magel2	forward	GGACAGCCACGTCGGCATGCTC
	reverse	GCTATGGACTGCAGGCACTGGG
Ndn	forward	GGCGCACGAGCTCATGTGGTACG
	reverse	TCTGCACCATTTCTTGTAGCTGCC
Snurf	forward	GAGTGATTTGCAACGCAATGGAGCG
	reverse	TGCTCAGTGAGGCTGTCCTTCGACG
Ipw	forward	GTTATTGCCTTGCCTGAGGAAAG
	reverse	GAGATTGTTTTGGTGAAGCTGCTG
Ube3a	forward	AGGTGCATCTAACAACTCAGAG
	reverse	TGACAGCAGCAAAATGTCCGCAGG
Npy	forward	CCGCCACGATGCTAGGTAAC
	reverse	CAGCCAGAATGCCCAAACAC
Pomc	forward	GCGACGGAAGAGAAAAGAGGT
	reverse	ATTGGAGGGACCCCTGTCG
Agrp	forward	CAGCCAGAATGCCCAAACAC
	reverse	GACTCGTGCAGCCTTACACAG
