# Supplementary figures and images for: Reassessment of the involvement of Snord115 in the serotonin 2c receptor pathway in a genetically relevant mouse model
Source: eLife journal article supplement (doi:10.7554/elife.60862), 2020-10-05

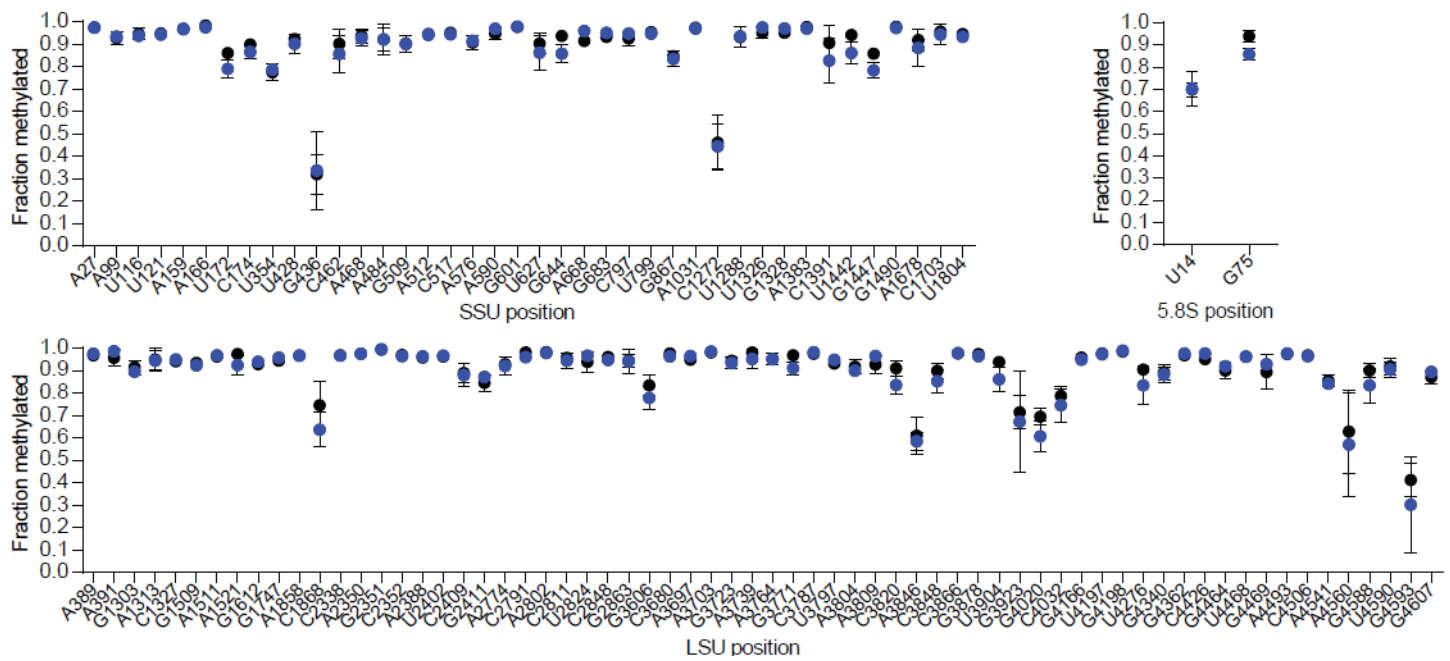

Hebras, Marty et al. Figure 1 - supplement figure 1

Supplement: supp [file elife-60862-supp-v1.zip]
